# Supplementary material
Source: publisher figshare collection journal article supplement (https://gsapubs.figshare.com/articles/dataset/_/12837788)
Supplement: Supplementary file 1 [file 1]

## Sheet: ReadMe
Mean Annual Temperature changes reconstructions from marine core MD96-2048
NAME OF DATA SET:
Mean Annual Temperature changes reconstructions from marine core MD96-2048
LAST UPDATE: 07/2020
CONTRIBUTOR: CHEVALIER Manuel
CONTACT: chevalier.manuel@gmail.com
ORIGINAL REFERENCE:
Manuel Chevalier, Brian M. Chase, Lynne J. Quick, Lydie M. Dupont and Thomas C. Johnson
"Temperature change in subtropical southeastern Africa during the past 790,000 years"
Chevalier, M., et al., 2020, Temperature change in subtropical southeastern Africa during the past 790,000 yr: Geology, v. 49, https://doi.org/10.1130/G47841.1
ABSTRACT:
Across the glacial-interglacial cycles of the late Pleistocene (~700 kyr), temperature variability at low latitudes is often considered to have been negligible compared to changes in precipitation. However, a paucity of quantified temperature records makes this difficult to reliably assess. In this study, we used the Bayesian method CREST (Climate REconstruction SofTware) to produce a 790,000-yea…
GEOGRAPHIC REGION: southeastern Africa
PERIOD OF RECORD: 790,000 YrBP - present
DESCRIPTION:
Pollen counts. If used, please cite BOTH references:
1/ ﻿Dupont, L.M., Caley, T., and Castañeda, I.S., 2019, Pollen and Spores of sediment core MD96-2048 Pleistocene:, doi:10.1594/PANGAEA.897922.
Reconstructions: Mean Annual Temperature Reconstructions ('best estimate')
Uncertainties: Posterior distribution of probabilities for each sample.
Plants_to_pollen: Conversion table of plant species to pollen taxa
Pollen_data: Percentage data used in the reconstruction.
Used_Taxa: List of selected and excluded pollen taxa.

## Sheet: Reconstructions
Numeric	bio1	CIinf_20%	CIsup_80%	sd
0	19.8323	17.0605	22.6934	2.21887
2	20.2197	17.5374	23.0511	2.15682
4	19.1468	16.2856	22.8723	2.58173
7	19.8323	16.7923	22.8126	2.34874
9	20.2197	17.0903	22.9617	2.29074
9	20.8456	17.8056	23.7068	2.30558
11	20.0111	17.1499	22.9319	2.2699
13	18.7593	16.3452	22.0676	2.26286
14	20.0111	17.1797	22.6636	2.14839
15	20.0111	17.1499	22.7828	2.20602
16	17.9248	15.8982	21.5013	2.21935
18	17.2691	15.1233	20.3091	2.0948
19	16.7327	14.3782	18.7593	1.85044
20	16.7625	14.6762	18.9978	1.81296
21	16.9413	14.7954	19.3256	1.87632
22	18.3123	16.7625	22.5146	2.26283
22	17.3287	14.9146	20.8456	2.40979
23	17.0903	14.9444	20.0111	2.08146
25	17.0605	14.8848	19.5938	1.92316
29	17.2393	14.9742	20.1303	2.08817
33	17.5672	15.6895	20.6966	2.00117
38	18.0142	16.226	21.4417	2.06171
41	17.9844	15.779	21.2629	2.17587
47	17.2393	15.0339	20.0409	2.03932
51	17.5672	15.4511	20.488	2.01929
56	17.597	15.4511	21.0244	2.23708
58	17.5374	15.3021	20.7562	2.19282
61	17.1797	14.9742	19.5938	1.90288
64	18.7891	16.6433	22.0676	2.13832
68	17.2095	15.0637	19.9515	2.00394
73	17.7162	15.8386	21.8887	2.39749
81	17.6864	15.6597	21.4417	2.30954
85	17.8056	15.7491	22.3954	2.62583
88	17.9844	15.8684	22.2166	2.52303
91	17.7162	15.5405	21.7397	2.4652
94	18.3421	15.928	22.1868	2.5167
97	18.2527	16.1664	21.7695	2.21705
99	18.6699	16.2558	22.3358	2.42372
102	20.2495	17.1797	22.9617	2.26949
105	19.4746	16.7625	22.2762	2.16634
108	18.4017	16.0174	22.3656	2.49654
110	17.5672	15.4511	22.3358	2.76658
112	20.3091	17.2095	23.1107	2.30156
114	21.6205	18.4017	24.1538	2.24426
115	17.8354	15.6597	21.5013	2.33371
117	20.6072	17.2989	23.5875	2.43475
119	20.2495	16.8817	23.0511	2.40203
121	20.3389	16.8519	23.4087	2.5561
122	18.4315	15.8684	21.6503	2.29116
124	21.7695	18.968	24.3028	2.08043
126	18.5805	15.9876	21.7099	2.2647
128	20.2495	17.597	23.0511	2.13376
129	17.6268	15.6299	21.7695	2.43733
131	17.2989	15.0637	20.0409	2.01478
134	18.2229	16.1664	21.0542	1.93544
135	18.8487	16.0472	21.5311	2.14801
137	17.4182	15.3319	20.8158	2.22762
139	17.3287	15.0339	20.2495	2.1146
141	17.2691	15.0041	20.5774	2.25095
143	17.5672	15.4213	21.3523	2.36397
145	17.3586	15.1829	21.0542	2.38764
146	17.0307	14.6762	19.7131	2.03313
147	18.0142	15.6597	21.3523	2.2737
151	16.9413	14.5868	19.117	1.87911
154	17.1201	14.8252	19.8025	2.04858
158	18.2229	16.1366	21.5907	2.17577
162	17.4778	15.3319	20.5178	2.07359
166	17.0903	14.7954	20.1899	2.22964
170	17.4182	15.1233	20.3389	2.12186
174	17.0009	14.7656	19.3852	1.89363
178	16.6433	14.2888	18.4017	1.78823
181	17.5076	15.1233	20.2197	2.03331
185	18.1633	16.1962	21.6503	2.13713
189	19.6534	16.3452	22.604	2.45999
193	17.597	15.2127	20.9052	2.28746
196	21.6503	18.4613	25.197	2.58957
199	18.3123	16.8221	22.5146	2.25024
202	17.9546	15.8088	21.2032	2.14236
206	18.5507	16.1366	22.0378	2.32652
209	20.1005	16.1962	23.6174	2.86789
212	19.5044	16.1366	22.3954	2.48776
215	20.1601	17.3586	22.8126	2.14319
219	19.6236	16.8221	22.6636	2.28434
222	19.0872	16.7625	22.2762	2.15728
225	18.8785	16.2856	23.3193	2.766
229	18.7295	16.1664	21.8887	2.27287
232	17.448	15.1829	20.5476	2.14361
235	17.3884	15.0935	20.7562	2.28496
239	19.8025	16.7029	22.7232	2.38588
242	17.7758	15.5703	21.4417	2.33166
247	17.5076	15.4213	20.6966	2.1333
252	17.0903	14.9742	20.1899	2.16223
257	18.1633	15.8684	21.4417	2.22499
263	17.1201	14.7954	19.9217	2.05992
268	17.7758	15.6895	21.5907	2.34858
274	17.4778	15.3617	21.4715	2.43588
279	17.2989	14.8848	20.1005	2.10983
285	18.044	16.077	21.7695	2.25848
290	17.4182	15.2425	20.2793	2.05212
296	17.9546	15.8088	21.4715	2.25106
301	18.2825	16.1962	21.1138	1.9596
307	17.895	15.9578	20.7562	2.00286
312	17.6864	15.5405	20.9648	2.16204
318	17.746	15.4511	21.7993	2.611
323	19.7727	16.6731	22.604	2.32687
325	19.1766	16.375	22.5146	2.41677
327	19.2064	16.6731	22.157	2.16326
329	19.6534	16.9413	22.604	2.21989
331	20.5178	17.2691	23.0213	2.23264
333	19.8323	16.9413	22.5444	2.18781
335	18.1036	16.0472	21.4119	2.13494
338	17.7162	15.4511	21.2927	2.34778
340	17.448	15.4809	20.7264	2.10343
342	17.5374	14.9742	21.3523	2.54161
349	17.6566	15.3617	20.7264	2.14454
356	16.8221	14.5272	18.968	1.85312
363	18.8189	16.4346	22.0974	2.23964
370	16.8519	13.8715	20.1005	2.51717
378	19.6833	16.7625	22.604	2.29176
385	17.6268	15.4809	21.1138	2.27365
392	19.5938	16.6433	23.2895	2.60848
400	20.2495	17.3287	23.0213	2.24025
408	19.9217	16.9711	23.0511	2.38562
416	20.2495	17.0009	23.0511	2.38205
423	19.0574	16.7029	21.9781	2.08342
430	19.117	16.4346	22.1272	2.24806
436	17.895	15.8386	21.3821	2.22347
443	18.5209	16.1664	21.7099	2.20741
449	17.2393	15.0935	19.9813	1.98621
455	17.448	15.0339	20.2197	2.09208
462	17.448	15.4213	19.9217	1.83504
466	17.0903	14.9146	19.5342	1.91646
475	17.5672	15.6299	19.8323	1.70722
481	16.9115	14.7954	18.9382	1.74672
486	18.5507	16.2856	21.9483	2.24471
491	19.5044	16.5837	22.7232	2.41048
495	18.2527	16.1366	21.1436	1.99216
500	18.9084	16.375	22.0676	2.25416
504	19.0574	16.4048	21.9781	2.19996
508	17.597	15.2425	20.488	2.10273
513	20.3985	16.9413	23.4385	2.5427
522	19.1766	16.5837	22.0676	2.16097
526	18.9084	16.5539	22.2464	2.24257
531	18.8189	16.4048	21.8589	2.16631
541	17.0605	14.9742	19.3554	1.8314
547	17.5374	15.1829	20.786	2.28557
555	17.7758	15.6001	20.8754	2.09462
561	17.6864	15.5703	20.6072	2.00778
566	18.2527	15.928	21.3225	2.14755
572	21.4417	18.3421	24.2432	2.28413
574	20.637	17.8652	23.2001	2.08869
577	17.746	15.5107	20.8754	2.14104
589	17.0903	14.7358	20.2793	2.32348
595	17.3586	15.1233	19.8323	1.92034
603	17.9844	15.6895	21.1734	2.1883
609	18.2229	16.0174	22.0676	2.38994
620	19.7429	16.9413	22.7232	2.27486
625	19.117	16.8817	21.7099	1.91375
633	17.0903	14.6464	19.8323	2.12818
640	16.9115	14.6166	19.1468	1.90375
647	16.8817	14.7656	19.0276	1.76665
651	17.4182	15.5703	19.9217	1.78105
658	17.0009	14.8848	19.0276	1.70775
665	17.1499	14.9146	19.8323	2.01039
676	16.6731	13.9907	18.7295	2.03521
686	17.1499	14.7656	20.1899	2.21671
694	17.5076	15.3319	20.4581	2.06585
702	18.1335	15.9578	21.6205	2.2765
708	18.1633	15.8684	20.9946	2.02841
713	17.2393	15.1233	20.0111	1.99123
721	16.8519	14.6166	18.9084	1.83266
726	16.8519	14.6166	18.9084	1.83266
734	17.5076	15.3021	20.3985	2.05365
742	16.6135	14.0205	18.8487	2.06617
753	16.9711	14.9146	18.7891	1.65544
760	17.5672	15.5703	20.1899	1.86283
771	17.746	15.7491	20.9052	2.05639
774	16.375	13.7523	18.7295	2.03421
781	20.2197	17.4182	23.0511	2.18847
785	18.0738	15.8684	21.2927	2.13942
790	17.0307	14.706	19.415	1.92669

## Sheet: Uncertainties
Sample	0	2	4	7	9	9	11	13	14	15	16	18	19	20	21	22	22	23	25	29	33	38	41	47	51	56	58	61	64	68	73	81	85	88	91	94	97	99	102	105	108	110	112	114	115	117	119	121	122
3.619	5.5851e-13	1.63e-15	2.03656e-11	1.35682e-12	2.54015e-13	4.23783e-14	4.1566e-14	6.6379e-12	6.79189e-14	3.28143e-14	1.50945e-11	1.17817e-09	1.67779e-07	2.34205e-09	6.10844e-10	7.79351e-16	9.40252e-08	8.86011e-09	1.88889e-09	2.82361e-08	7.68931e-12	1.61225e-14	4.49064e-10	3.70158e-09	1.00493e-09	1.57809e-10	4.07165e-09	3.50199e-09	1.46912e-14	1.12492e-08	6.03385e-10	5.00133e-10	2.76177e-09	6.7769e-10	3.33448e-09	1.30642e-09	6.09589e-13	3.46807e-11	1.20003e-13	1.85116e-13	4.52471e-10	1.48416e-10	3.00405e-14	5.67703e-15	9.57136e-10	1.65161e-13	3.79069e-12	4.91984e-12	1.09621e-10
3.6488	6.14113e-13	1.82551e-15	2.2076e-11	1.48642e-12	2.79122e-13	4.66207e-14	4.59581e-14	7.23818e-12	7.52123e-14	3.63844e-14	1.64497e-11	1.26822e-09	1.78275e-07	2.52234e-09	6.61734e-10	8.74337e-16	9.9358e-08	9.46516e-09	2.03782e-09	3.01044e-08	8.42219e-12	1.80178e-14	4.8466e-10	3.97317e-09	1.08409e-09	1.7076e-10	4.36453e-09	3.7692e-09	1.63397e-14	1.1986e-08	6.4775e-10	5.3772e-10	2.94938e-09	7.26587e-10	3.56858e-09	1.39849e-09	6.72749e-13	3.75702e-11	1.32581e-13	2.0454e-13	4.8648e-10	1.60532e-10	3.32281e-14	6.29849e-15	1.02807e-09	1.81386e-13	4.13015e-12	5.35095e-12	1.19049e-10
3.67861	6.75133e-13	2.04406e-15	2.39268e-11	1.62814e-12	3.06663e-13	5.12798e-14	5.08052e-14	7.8915e-12	8.32735e-14	4.03355e-14	1.79235e-11	1.36495e-09	1.894e-07	2.71607e-09	7.16762e-10	9.80719e-16	1.04982e-07	1.01102e-08	2.19812e-09	3.20918e-08	9.22326e-12	2.01317e-14	5.22994e-10	4.26407e-09	1.16929e-09	1.84746e-10	4.67778e-09	4.05615e-09	1.817e-14	1.27696e-08	6.95286e-10	5.78052e-10	3.14933e-09	7.78914e-10	3.81859e-09	1.49686e-09	7.42332e-13	4.06949e-11	1.46453e-13	2.25961e-13	5.22972e-10	1.7361e-10	3.67476e-14	6.98675e-15	1.10411e-09	1.99172e-13	4.49932e-12	5.81905e-12	1.29267e-10
3.70841	7.42083e-13	2.28831e-15	2.59294e-11	1.78308e-12	3.36869e-13	5.63956e-14	5.61536e-14	8.60244e-12	9.21817e-14	4.47074e-14	1.95263e-11	1.46884e-09	2.01191e-07	2.92422e-09	7.76255e-10	1.09984e-15	1.10911e-07	1.07977e-08	2.37062e-09	3.42057e-08	1.00987e-11	2.24891e-14	5.64271e-10	4.57561e-09	1.26098e-09	1.99846e-10	5.01276e-09	4.36424e-09	2.02015e-14	1.36029e-08	7.46215e-10	6.21324e-10	3.36242e-09	8.34903e-10	4.08555e-09	1.60194e-09	8.18981e-13	4.40734e-11	1.6175e-13	2.49581e-13	5.62122e-10	1.87724e-10	4.06326e-14	7.74886e-15	1.1856e-09	2.18667e-13	4.90072e-12	6.32723e-12	1.40339e-10
3.73822	8.15528e-13	2.56122e-15	2.80959e-11	1.95247e-12	3.69991e-13	6.2012e-14	6.20538e-14	9.37595e-12	1.02024e-13	4.95442e-14	2.12689e-11	1.58039e-09	2.13686e-07	3.14783e-09	8.40568e-10	1.2332e-15	1.17162e-07	1.15305e-08	2.55623e-09	3.64537e-08	1.10553e-11	2.51173e-14	6.08709e-10	4.9092e-09	1.35963e-09	2.16148e-10	5.37092e-09	4.69497e-09	2.2456e-14	1.4489e-08	8.00771e-10	6.67744e-10	3.58948e-09	8.94803e-10	4.37057e-09	1.71416e-09	9.03397e-13	4.7726e-11	1.78614e-13	2.75621e-13	6.04119e-10	2.02954e-10	4.49205e-14	8.5926e-15	1.27292e-09	2.40031e-13	5.33712e-12	6.87885e-12	1.52334e-10
3.76802	8.96082e-13	2.86611e-15	3.04394e-11	2.1376e-12	4.06306e-13	6.81769e-14	6.85619e-14	1.02174e-11	1.12896e-13	5.48942e-14	2.31633e-11	1.70016e-09	2.26924e-07	3.388e-09	9.10078e-10	1.38248e-15	1.23752e-07	1.23113e-08	2.75591e-09	3.88441e-08	1.21002e-11	2.8047e-14	6.56542e-10	5.26635e-09	1.46576e-09	2.33743e-10	5.7538e-09	5.04994e-09	2.49574e-14	1.54312e-08	8.59204e-10	7.17533e-10	3.83139e-09	9.58879e-10	4.67482e-09	1.83401e-09	9.96355e-13	5.16742e-11	1.97204e-13	3.04322e-13	6.49162e-10	2.19386e-10	4.96522e-14	9.52653e-15	1.36648e-09	2.6344e-13	5.81148e-12	7.47754e-12	1.65326e-10
3.79782	9.84419e-13	3.20663e-15	3.29741e-11	2.33992e-12	4.46116e-13	7.49429e-14	7.57389e-14	1.11326e-11	1.24904e-13	6.08107e-14	2.52223e-11	1.82873e-09	2.40947e-07	3.64592e-09	9.85196e-10	1.54953e-15	1.30697e-07	1.31433e-08	2.97067e-09	4.13854e-08	1.32416e-11	3.1312e-14	7.08021e-10	5.64867e-09	1.57992e-09	2.52732e-10	6.16305e-09	5.43087e-09	2.77324e-14	1.64327e-08	9.21782e-10	7.70927e-10	4.08909e-09	1.02741e-09	4.99957e-09	1.96197e-09	1.0987e-12	5.59414e-11	2.17692e-13	3.35952e-13	6.97465e-10	2.37111e-10	5.48726e-14	1.05601e-14	1.46671e-09	2.89085e-13	6.32702e-12	8.12722e-12	1.79397e-10
3.82763	1.08127e-12	3.58689e-15	3.57152e-11	2.56098e-12	4.89749e-13	8.23673e-14	8.36523e-14	1.21279e-11	1.38163e-13	6.73526e-14	2.74599e-11	1.96673e-09	2.55801e-07	3.92285e-09	1.06636e-09	1.73645e-15	1.38017e-07	1.40296e-08	3.20164e-09	4.40868e-08	1.4488e-11	3.49499e-14	7.63415e-10	6.05786e-09	1.70268e-09	2.73221e-10	6.6004e-09	5.83958e-09	3.08101e-14	1.74974e-08	9.88789e-10	8.28181e-10	4.36358e-09	1.10071e-09	5.34614e-09	2.09859e-09	1.21136e-12	6.05527e-11	2.40268e-13	3.70803e-13	7.49257e-10	2.56229e-10	6.06312e-14	1.17038e-14	1.57406e-09	3.17176e-13	6.88723e-12	8.83214e-12	1.94633e-10
3.85743	1.18744e-12	4.01143e-15	3.8679e-11	2.80248e-12	5.37565e-13	9.05128e-14	9.23761e-14	1.321e-11	1.52802e-13	7.45844e-14	2.98911e-11	2.11481e-09	2.71531e-07	4.22014e-09	1.15405e-09	1.94555e-15	1.45729e-07	1.49736e-08	3.44997e-09	4.6958e-08	1.58488e-11	3.90024e-14	8.23012e-10	6.49576e-09	1.83468e-09	2.95326e-10	7.06772e-09	6.27803e-09	3.42231e-14	1.86289e-08	1.06053e-09	8.89563e-10	4.65592e-09	1.17908e-09	5.71594e-09	2.24442e-09	1.33536e-12	6.55353e-11	2.65142e-13	4.09196e-13	8.04782e-10	2.76844e-10	6.69824e-14	1.29691e-14	1.68903e-09	3.4794e-13	7.49589e-12	9.59689e-12	2.11128e-10
3.88723	1.3038e-12	4.48531e-15	4.18834e-11	3.06627e-12	5.89956e-13	9.94482e-14	1.01991e-13	1.43865e-11	1.6896e-13	8.25776e-14	3.25323e-11	2.2737e-09	2.88188e-07	4.53925e-09	1.24877e-09	2.17943e-15	1.53856e-07	1.5979e-08	3.71693e-09	5.00091e-08	1.73343e-11	4.3516e-14	8.87119e-10	6.9643e-09	1.97659e-09	3.19169e-10	7.56699e-09	6.74829e-09	3.80071e-14	1.98315e-08	1.13733e-09	9.55362e-10	4.96721e-09	1.26287e-09	6.11047e-09	2.40007e-09	1.47182e-12	7.09183e-11	2.92542e-13	4.51484e-13	8.643e-10	2.99072e-10	7.39859e-14	1.43686e-14	1.81214e-09	3.81626e-13	8.15708e-12	1.04264e-11	2.28983e-10
3.91704	1.43132e-12	5.01414e-15	4.53472e-11	3.35435e-12	6.47352e-13	1.09248e-13	1.12588e-13	1.56652e-11	1.86793e-13	9.14106e-14	3.5401e-11	2.44416e-09	3.05821e-07	4.8817e-09	1.35106e-09	2.44095e-15	1.62417e-07	1.70496e-08	4.00386e-09	5.3251e-08	1.89556e-11	4.85418e-14	9.56067e-10	7.46555e-09	2.12911e-09	3.44885e-10	8.10029e-09	7.2526e-09	4.22017e-14	2.11093e-08	1.21953e-09	1.02589e-09	5.29865e-09	1.35245e-09	6.53134e-09	2.56618e-09	1.62197e-12	7.67329e-11	3.22719e-13	4.98052e-13	9.2809e-10	3.23034e-10	8.17073e-14	1.59164e-14	1.94394e-09	4.18505e-13	8.87523e-12	1.13261e-11	2.48307e-10
3.94684	1.57102e-12	5.6042e-15	4.90912e-11	3.66891e-12	7.1022e-13	1.19995e-13	1.24262e-13	1.70549e-11	2.06469e-13	1.0117e-13	3.85165e-11	2.627e-09	3.24487e-07	5.24916e-09	1.46153e-09	2.73334e-15	1.71435e-07	1.81895e-08	4.31222e-09	5.66951e-08	2.07247e-11	5.4137e-14	1.03021e-09	8.00173e-09	2.29303e-09	3.72614e-10	8.66986e-09	7.79331e-09	4.68504e-14	2.2467e-08	1.3075e-09	1.10146e-09	5.6515e-09	1.44819e-09	6.98023e-09	2.74342e-09	1.78714e-12	8.30131e-11	3.5595e-13	5.49325e-13	9.96447e-10	3.48861e-10	9.02187e-14	1.76277e-14	2.08503e-09	4.58875e-13	9.65511e-12	1.23017e-11	2.69216e-10
3.97665	1.72405e-12	6.26242e-15	5.31372e-11	4.01233e-12	7.7907e-13	1.31778e-13	1.37123e-13	1.85649e-11	2.28176e-13	1.1195e-13	4.18993e-11	2.82308e-09	3.44243e-07	5.64337e-09	1.5808e-09	3.06018e-15	1.80933e-07	1.9403e-08	4.64353e-09	6.03534e-08	2.26548e-11	6.03646e-14	1.10992e-09	8.57516e-09	2.46916e-09	4.02511e-10	9.27808e-09	8.37296e-09	5.20016e-14	2.39094e-08	1.40164e-09	1.18244e-09	6.02708e-09	1.55052e-09	7.45893e-09	2.93252e-09	1.96882e-12	8.9795e-11	3.92538e-13	6.05768e-13	1.06969e-09	3.76695e-10	9.95992e-14	1.95197e-14	2.23605e-09	5.03057e-13	1.05019e-11	1.33595e-11	2.91838e-10
4.00645	1.89165e-12	6.99653e-15	5.75093e-11	4.3872e-12	8.5446e-13	1.44696e-13	1.51288e-13	2.02054e-11	2.52117e-13	1.23857e-13	4.55717e-11	3.03334e-09	3.65148e-07	6.06622e-09	1.70956e-09	3.42545e-15	1.90936e-07	2.06945e-08	4.99943e-09	6.42388e-08	2.47601e-11	6.72948e-14	1.19561e-09	9.18835e-09	2.65837e-09	4.34739e-10	9.92745e-09	8.99424e-09	5.77084e-14	2.54416e-08	1.50236e-09	1.26919e-09	6.42682e-09	1.65986e-09	7.96937e-09	3.13424e-09	2.16862e-12	9.71179e-11	4.32813e-13	6.67891e-13	1.14815e-09	4.06686e-10	1.09936e-13	2.1611e-14	2.39766e-09	5.51405e-13	1.14212e-11	1.45063e-11	3.16308e-10
4.03625	2.07518e-12	7.81511e-15	6.22329e-11	4.79633e-12	9.36997e-13	1.58854e-13	1.66887e-13	2.19874e-11	2.7852e-13	1.37004e-13	4.95579e-11	3.25876e-09	3.87267e-07	6.51972e-09	1.84854e-09	3.83359e-15	2.01468e-07	2.20691e-08	5.3817e-09	6.83645e-08	2.70562e-11	7.50051e-14	1.28771e-09	9.84397e-09	2.8616e-09	4.69474e-10	1.06207e-08	9.66004e-09	6.40295e-14	2.7069e-08	1.61011e-09	1.36212e-09	6.8522e-09	1.77669e-09	8.51355e-09	3.34939e-09	2.38831e-12	1.05024e-10	4.77141e-13	7.36253e-13	1.2322e-09	4.38996e-10	1.21323e-13	2.39221e-14	2.57058e-09	6.04301e-13	1.2419e-11	1.57493e-11	3.42772e-10
4.06606	2.27611e-12	8.7277e-15	6.73358e-11	5.24278e-12	1.02735e-12	1.7437e-13	1.84061e-13	2.39228e-11	3.0763e-13	1.51519e-13	5.3884e-11	3.5004e-09	4.10666e-07	7.00599e-09	1.99852e-09	4.28955e-15	2.12557e-07	2.35317e-08	5.79221e-09	7.2745e-08	2.95597e-11	8.35815e-14	1.38669e-09	1.05448e-08	3.07986e-09	5.06906e-10	1.13606e-08	1.03734e-08	7.10298e-14	2.87973e-08	1.72537e-09	1.46165e-09	7.30483e-09	1.9015e-09	9.09364e-09	3.57884e-09	2.62985e-12	1.13558e-10	5.25922e-13	8.11467e-13	1.32221e-09	4.73799e-10	1.33867e-13	2.64757e-14	2.75558e-09	6.62165e-13	1.3502e-11	1.70965e-11	3.71389e-10
4.09586	2.49605e-12	9.74488e-15	7.28476e-11	5.72987e-12	1.12623e-12	1.91371e-13	2.02967e-13	2.60244e-11	3.39719e-13	1.67541e-13	5.85781e-11	3.75937e-09	4.35416e-07	7.52733e-09	2.16036e-09	4.79882e-15	2.24231e-07	2.50878e-08	6.23296e-09	7.73951e-08	3.22889e-11	9.31193e-14	1.49302e-09	1.12939e-08	3.31422e-09	5.47237e-10	1.21501e-08	1.11376e-08	7.87807e-14	3.06325e-08	1.84863e-09	1.56823e-09	7.78637e-09	2.03482e-09	9.71191e-09	3.82351e-09	2.89534e-12	1.22768e-10	5.79592e-13	8.94204e-13	1.4186e-09	5.11281e-10	1.47682e-13	2.92967e-14	2.95346e-09	7.25452e-13	1.46771e-11	1.85564e-11	4.02327e-10
4.12566	2.73675e-12	1.08784e-14	7.88003e-11	6.26122e-12	1.23443e-12	2.09997e-13	2.23774e-13	2.83061e-11	3.75086e-13	1.85222e-13	6.36707e-11	4.03689e-09	4.6159e-07	8.08617e-09	2.33496e-09	5.36752e-15	2.36518e-07	2.67432e-08	6.7061e-09	8.23309e-08	3.52637e-11	1.03724e-13	1.60726e-09	1.20945e-08	3.56581e-09	5.90685e-10	1.29926e-08	1.19561e-08	8.7361e-14	3.25812e-08	1.98044e-09	1.68235e-09	8.2986e-09	2.17721e-09	1.03708e-08	4.08437e-09	3.18713e-12	1.32708e-10	6.38632e-13	9.85202e-13	1.5218e-09	5.51642e-10	1.62894e-13	3.24126e-14	3.16511e-09	7.94659e-13	1.59521e-11	2.01381e-11	4.35769e-10
4.15547	3.00014e-12	1.21413e-14	8.52284e-11	6.84075e-12	1.35282e-12	2.30398e-13	2.46671e-13	3.0783e-11	4.14058e-13	2.04732e-13	6.91947e-11	4.33423e-09	4.89265e-07	8.68511e-09	2.52331e-09	6.00248e-15	2.4945e-07	2.85038e-08	7.21393e-09	8.75689e-08	3.85054e-11	1.15513e-13	1.72995e-09	1.295e-08	3.83586e-09	6.37483e-10	1.38914e-08	1.28327e-08	9.68578e-14	3.46499e-08	2.12138e-09	1.80451e-09	8.84342e-09	2.32927e-09	1.10728e-08	4.36245e-09	3.50777e-12	1.43433e-10	7.03569e-13	1.08527e-12	1.63227e-09	5.95097e-10	1.79642e-13	3.58536e-14	3.39144e-09	8.70329e-13	1.73351e-11	2.18516e-11	4.71912e-10
4.18527	3.28828e-12	1.35481e-14	9.21688e-11	7.47274e-12	1.48232e-12	2.52742e-13	2.71863e-13	3.34713e-11	4.56994e-13	2.26255e-13	7.51856e-11	4.65276e-09	5.18525e-07	9.32691e-09	2.72644e-09	6.71125e-15	2.63058e-07	3.03762e-08	7.75887e-09	9.3127e-08	4.20374e-11	1.28614e-13	1.86171e-09	1.38639e-08	4.12567e-09	6.8788e-10	1.48501e-08	1.37712e-08	1.07367e-13	3.68459e-08	2.27205e-09	1.93527e-09	9.42282e-09	2.49163e-09	1.18207e-08	4.65885e-09	3.86004e-12	1.55004e-10	7.74978e-13	1.19528e-12	1.75053e-09	6.41874e-10	1.98076e-13	3.9653e-14	3.63343e-09	9.5305e-13	1.88351e-11	2.37077e-11	5.10968e-10
4.21508	3.60346e-12	1.51148e-14	9.96614e-11	8.16181e-12	1.62397e-12	2.77208e-13	2.99573e-13	3.63886e-11	5.04289e-13	2.49994e-13	8.16818e-11	4.99393e-09	5.49453e-07	1.00145e-08	2.9455e-09	7.50227e-15	2.77377e-07	3.23672e-08	8.34355e-09	9.90237e-08	4.58848e-11	1.43172e-13	2.00319e-09	1.48401e-08	4.43663e-09	7.42147e-10	1.58725e-08	1.47759e-08	1.18994e-13	3.91767e-08	2.43311e-09	2.07522e-09	1.00389e-08	2.66496e-09	1.26174e-08	4.97473e-09	4.24701e-12	1.67486e-10	8.53492e-13	1.31621e-12	1.87708e-09	6.92219e-10	2.18363e-13	4.38473e-14	3.89214e-09	1.04347e-12	2.04618e-11	2.57178e-11	5.53162e-10
4.24488	3.94815e-12	1.68593e-14	1.07749e-10	8.91299e-12	1.77887e-12	3.03994e-13	3.3005e-13	3.95538e-11	5.56375e-13	2.76173e-13	8.87247e-11	5.35929e-09	5.82142e-07	1.07511e-08	3.18169e-09	8.38491e-15	2.92442e-07	3.44838e-08	8.97075e-09	1.05279e-07	5.00752e-11	1.59344e-13	2.15507e-09	1.58828e-08	4.77024e-09	8.00568e-10	1.69627e-08	1.58513e-08	1.31855e-13	4.16504e-08	2.60524e-09	2.22497e-09	1.06939e-08	2.84999e-09	1.34659e-08	5.31134e-09	4.67203e-12	1.80948e-10	9.39802e-13	1.44912e-12	2.0125e-09	7.46397e-10	2.40686e-13	4.84767e-14	4.16866e-09	1.14227e-12	2.22255e-11	2.78945e-11	5.98741e-10
4.27468	4.32503e-12	1.88013e-14	1.16478e-10	9.73176e-12	1.94823e-12	3.33316e-13	3.63562e-13	4.29875e-11	6.13726e-13	3.05036e-13	9.63591e-11	5.75049e-09	6.16684e-07	1.154e-08	3.43631e-09	9.36959e-15	3.08288e-07	3.67338e-08	9.64344e-09	1.11913e-07	5.4638e-11	1.77307e-13	2.31808e-09	1.69963e-08	5.12807e-09	8.63454e-10	1.8125e-08	1.7002e-08	1.4608e-13	4.42753e-08	2.78918e-09	2.38518e-09	1.13903e-08	3.04748e-09	1.43695e-08	5.66998e-09	5.13876e-12	1.95466e-10	1.03467e-12	1.59516e-12	2.15739e-09	8.0469e-10	2.65245e-13	5.35855e-14	4.46419e-09	1.25024e-12	2.41375e-11	3.02512e-11	6.47966e-10
4.30449	4.73706e-12	2.09627e-14	1.25898e-10	1.06241e-11	2.13339e-12	3.65407e-13	4.00407e-13	4.67119e-11	6.76862e-13	3.36854e-13	1.04633e-10	6.1693e-09	6.5318e-07	1.23848e-08	3.71075e-09	1.04679e-14	3.24956e-07	3.91251e-08	1.03648e-08	1.18948e-07	5.96056e-11	1.97253e-13	2.49303e-09	1.81851e-08	5.51181e-09	9.31133e-10	1.9364e-08	1.82333e-08	1.61808e-13	4.70604e-08	2.98573e-09	2.55657e-09	1.21304e-08	3.25823e-09	1.53316e-08	6.05203e-09	5.65121e-12	2.1112e-10	1.13892e-12	1.7556e-12	2.31238e-09	8.67399e-10	2.92258e-13	5.92223e-14	4.77999e-09	1.36819e-12	2.621e-11	3.28025e-11	7.0112e-10
4.33429	5.18741e-12	2.33679e-14	1.36062e-10	1.15963e-11	2.33576e-12	4.00525e-13	4.40906e-13	5.07508e-11	7.46355e-13	3.71921e-13	1.13599e-10	6.61758e-09	6.91734e-07	1.32893e-08	4.00651e-09	1.16926e-14	3.42485e-07	4.16664e-08	1.11382e-08	1.26408e-07	6.50128e-11	2.19398e-13	2.68074e-09	1.94543e-08	5.92328e-09	1.00396e-09	2.06845e-08	1.95505e-08	1.79196e-13	5.00151e-08	3.19571e-09	2.73989e-09	1.2917e-08	3.48312e-09	1.63559e-08	6.45899e-09	6.21377e-12	2.27996e-10	1.25346e-12	1.93184e-12	2.47815e-09	9.3485e-10	3.21965e-13	6.54405e-14	5.11739e-09	1.49702e-12	2.84561e-11	3.55639e-11	7.58506e-10
4.3641	5.67956e-12	2.60438e-14	1.47027e-10	1.26555e-11	2.55693e-12	4.38947e-13	4.85417e-13	5.51301e-11	8.22829e-13	4.10563e-13	1.23313e-10	7.09734e-09	7.32456e-07	1.42576e-08	4.32521e-09	1.30581e-14	3.60917e-07	4.43665e-08	1.19672e-08	1.34315e-07	7.08974e-11	2.43977e-13	2.88212e-09	2.0809e-08	6.36439e-09	1.08231e-09	2.20917e-08	2.09593e-08	1.98416e-13	5.31494e-08	3.42001e-09	2.93593e-09	1.37528e-08	3.72305e-09	1.74462e-08	6.8924e-09	6.83123e-12	2.46188e-10	1.37928e-12	2.12539e-12	2.65544e-09	1.00739e-09	3.5463e-13	7.22989e-14	5.47783e-09	1.63772e-12	3.08899e-11	3.85525e-11	8.20452e-10
4.3939	6.2173e-12	2.90202e-14	1.58856e-10	1.38093e-11	2.7986e-12	4.80979e-13	5.34326e-13	5.98778e-11	9.06969e-13	4.53135e-13	1.33835e-10	7.61071e-09	7.75461e-07	1.52939e-08	4.66855e-09	1.45803e-14	3.80297e-07	4.72349e-08	1.28557e-08	1.42698e-07	7.73001e-11	2.71254e-13	3.09813e-09	2.22547e-08	6.83721e-09	1.16659e-09	2.3591e-08	2.24659e-08	2.19656e-13	5.64738e-08	3.65958e-09	3.14555e-09	1.46409e-08	3.97899e-09	1.86065e-08	7.35394e-09	7.50884e-12	2.65796e-10	1.51749e-12	2.33792e-12	2.84501e-09	1.08538e-09	3.9054e-13	7.9862e-14	5.86281e-09	1.79136e-12	3.35268e-11	4.17864e-11	8.87307e-10
4.4237	6.80474e-12	3.23303e-14	1.71613e-10	1.50658e-11	3.06262e-12	5.26952e-13	5.88059e-13	6.5024e-11	9.99527e-13	5.00028e-13	1.45232e-10	8.15994e-09	8.20869e-07	1.6403e-08	5.03839e-09	1.62767e-14	4.0067e-07	5.02819e-08	1.38078e-08	1.51581e-07	8.42654e-11	3.01517e-13	3.32978e-09	2.37975e-08	7.34391e-09	1.25724e-09	2.51881e-08	2.40767e-08	2.43124e-13	5.99994e-08	3.91542e-09	3.36966e-09	1.55844e-08	4.25199e-09	1.98413e-08	7.84535e-09	8.25233e-12	2.86926e-10	1.66925e-12	2.57124e-12	3.04769e-09	1.16924e-09	4.3001e-13	8.82008e-14	6.27395e-09	1.9591e-12	3.63831e-11	4.52852e-11	9.59447e-10
4.45351	7.44636e-12	3.60105e-14	1.85372e-10	1.6434e-11	3.35101e-12	5.77226e-13	6.47081e-13	7.06012e-11	1.10132e-12	5.51672e-13	1.57572e-10	8.74746e-09	8.68808e-07	1.75896e-08	5.43671e-09	1.81669e-14	4.22086e-07	5.35178e-08	1.48279e-08	1.60994e-07	9.18412e-11	3.35086e-13	3.57817e-09	2.54434e-08	7.88683e-09	1.35472e-09	2.68893e-08	2.57987e-08	2.69048e-13	6.37379e-08	4.18859e-09	3.60922e-09	1.65865e-08	4.54314e-09	2.11551e-08	8.36851e-09	9.06798e-12	3.09693e-10	1.83589e-12	2.82733e-12	3.26434e-09	1.25937e-09	4.73387e-13	9.73932e-14	6.71295e-09	2.14219e-12	3.94767e-11	4.90701e-11	1.03728e-09
4.48331	8.14704e-12	4.01017e-14	2.00207e-10	1.79237e-11	3.66598e-12	6.32197e-13	7.11901e-13	7.66445e-11	1.21326e-12	6.08535e-13	1.70934e-10	9.37582e-09	9.19411e-07	1.88589e-08	5.86563e-09	2.02726e-14	4.44594e-07	5.6954e-08	1.59205e-08	1.70967e-07	1.00079e-10	3.72315e-13	3.84447e-09	2.71991e-08	8.46847e-09	1.45953e-09	2.8701e-08	2.76391e-08	2.97681e-13	6.77017e-08	4.48025e-09	3.86525e-09	1.76509e-08	4.8536e-09	2.25528e-08	8.92538e-09	9.96264e-12	3.34222e-10	2.01882e-12	3.10838e-12	3.4959e-09	1.35624e-09	5.21048e-13	1.07525e-13	7.18165e-09	2.34203e-12	4.28268e-11	5.31639e-11	1.12123e-09
4.51311	8.91205e-12	4.46485e-14	2.16202e-10	1.95452e-11	4.00991e-12	6.92292e-13	7.83076e-13	8.31917e-11	1.33633e-12	6.71136e-13	1.85397e-10	1.00477e-08	9.72816e-07	2.02167e-08	6.32743e-09	2.2618e-14	4.68247e-07	6.06024e-08	1.70908e-08	1.81532e-07	1.09036e-10	4.13593e-13	4.12992e-09	2.90718e-08	9.09147e-09	1.5722e-09	3.063e-08	2.96059e-08	3.29299e-13	7.19039e-08	4.79158e-09	4.13886e-09	1.87812e-08	5.18461e-09	2.40394e-08	9.51806e-09	1.09438e-11	3.60645e-10	2.2196e-12	3.41676e-12	3.74337e-09	1.46033e-09	5.73406e-13	1.18689e-13	7.68196e-09	2.56009e-12	4.6454e-11	5.75912e-11	1.21178e-09
4.54292	9.74717e-12	4.97008e-14	2.33444e-10	2.131e-11	4.38541e-12	7.57978e-13	8.61215e-13	9.02838e-11	1.47161e-12	7.40037e-13	2.01052e-10	1.07662e-08	1.02917e-06	2.16686e-08	6.82454e-09	2.52298e-14	4.931e-07	6.44753e-08	1.83438e-08	1.92722e-07	1.18772e-10	4.59352e-13	4.43583e-09	3.10688e-08	9.75864e-09	1.6933e-09	3.26836e-08	3.17073e-08	3.64207e-13	7.63583e-08	5.12388e-09	4.43119e-09	1.99813e-08	5.53748e-09	2.56206e-08	1.01488e-08	1.20196e-11	3.89103e-10	2.43993e-12	3.75506e-12	4.00779e-09	1.57217e-09	6.30915e-13	1.3099e-13	8.21596e-09	2.79801e-12	5.03807e-11	6.23784e-11	1.30941e-09
4.57272	1.06586e-11	5.53137e-14	2.52029e-10	2.32305e-11	4.7953e-12	8.29764e-13	9.46984e-13	9.79648e-11	1.62027e-12	8.15861e-13	2.17992e-10	1.15342e-08	1.08863e-06	2.32211e-08	7.35959e-09	2.81377e-14	5.19212e-07	6.85861e-08	1.96854e-08	2.04572e-07	1.29354e-10	5.10066e-13	4.76363e-09	3.3198e-08	1.0473e-08	1.82343e-09	3.48695e-08	3.3952e-08	4.0274e-13	8.10794e-08	5.47851e-09	4.74349e-09	2.12555e-08	5.91361e-09	2.73019e-08	1.08199e-08	1.31991e-11	4.19749e-10	2.68168e-12	4.12611e-12	4.29028e-09	1.69231e-09	6.9407e-13	1.44541e-13	8.78581e-09	3.05755e-12	5.4631e-11	6.75541e-11	1.41468e-09
4.60253	1.16533e-11	6.15479e-14	2.72057e-10	2.532e-11	5.24267e-12	9.08204e-13	1.04111e-12	1.06282e-10	1.78362e-12	8.99285e-13	2.36321e-10	1.2355e-08	1.15135e-06	2.48807e-08	7.93536e-09	3.13744e-14	5.46641e-07	7.29487e-08	2.11214e-08	2.1712e-07	1.40851e-10	5.6626e-13	5.11482e-09	3.54679e-08	1.12378e-08	1.96326e-09	3.71959e-08	3.63496e-08	4.45266e-13	8.60826e-08	5.85692e-09	5.07708e-09	2.2608e-08	6.31448e-09	2.90896e-08	1.15338e-08	1.44919e-11	4.52748e-10	2.94688e-12	4.53302e-12	4.59203e-09	1.82134e-09	7.63412e-13	1.59464e-13	9.39383e-09	3.34063e-12	5.92308e-11	7.3149e-11	1.52814e-09
4.63233	1.27385e-11	6.8471e-14	2.9364e-10	2.7593e-11	5.73086e-12	9.93901e-13	1.14439e-12	1.15287e-10	1.96307e-12	9.91055e-13	2.56148e-10	1.32322e-08	1.2175e-06	2.66547e-08	8.55486e-09	3.49767e-14	5.75452e-07	7.75779e-08	2.26582e-08	2.30403e-07	1.53342e-10	6.28513e-13	5.491e-09	3.78875e-08	1.20563e-08	2.11348e-09	3.96713e-08	3.89098e-08	4.92189e-13	9.13841e-08	6.26065e-09	5.43333e-09	2.40435e-08	6.74166e-09	3.099e-08	1.22933e-08	1.59087e-11	4.88273e-10	3.23775e-12	4.97917e-12	4.91433e-09	1.9599e-09	8.39535e-13	1.75898e-13	1.00425e-08	3.64933e-12	6.42081e-11	7.9196e-11	1.65043e-09
4.66213	1.39222e-11	7.61573e-14	3.16894e-10	3.00652e-11	6.26351e-12	1.08751e-12	1.2577e-12	1.25035e-10	2.16018e-12	1.09199e-12	2.77593e-10	1.41695e-08	1.28726e-06	2.85505e-08	9.22129e-09	3.89847e-14	6.05709e-07	8.2489e-08	2.43026e-08	2.44464e-07	1.66909e-10	6.97464e-13	5.89388e-09	4.04661e-08	1.29324e-08	2.27483e-09	4.2305e-08	4.16433e-08	5.43954e-13	9.7001e-08	6.69133e-09	5.81375e-09	2.55669e-08	7.19681e-09	3.30099e-08	1.3101e-08	1.74612e-11	5.26515e-10	3.55673e-12	5.46825e-12	5.2585e-09	2.10868e-09	9.23086e-13	1.93992e-13	1.07344e-08	3.98592e-12	6.95929e-11	8.5731e-11	1.7822e-09
4.69194	1.52133e-11	8.46894e-14	3.41944e-10	3.27537e-11	6.84456e-12	1.18974e-12	1.38198e-12	1.35586e-10	2.37662e-12	1.20297e-12	3.00783e-10	1.51707e-08	1.36082e-06	3.05761e-08	9.9381e-09	4.34435e-14	6.37482e-07	8.76987e-08	2.60619e-08	2.59345e-07	1.81642e-10	7.73816e-13	6.3253e-09	4.32138e-08	1.38697e-08	2.44811e-09	4.51066e-08	4.45612e-08	6.01051e-13	1.02951e-07	7.15071e-09	6.21991e-09	2.71834e-08	7.68171e-09	3.51567e-08	1.39601e-08	1.91621e-11	5.67673e-10	3.90646e-12	6.0043e-12	5.62598e-09	2.2684e-09	1.01477e-12	2.13909e-13	1.14724e-08	4.35285e-12	7.54179e-11	9.2792e-11	1.92416e-09
4.72174	1.66211e-11	9.41583e-14	3.68928e-10	3.56769e-11	7.47831e-12	1.30138e-12	1.51828e-12	1.47003e-10	2.61427e-12	1.32499e-12	3.25858e-10	1.62402e-08	1.43836e-06	3.27402e-08	1.0709e-08	4.84026e-14	6.70842e-07	9.32241e-08	2.79436e-08	2.75092e-07	1.97639e-10	8.58345e-13	6.78718e-09	4.61412e-08	1.48724e-08	2.63417e-09	4.80862e-08	4.76755e-08	6.64016e-13	1.09254e-07	7.64062e-09	6.65348e-09	2.88984e-08	8.19821e-09	3.74379e-08	1.48735e-08	2.10251e-11	6.11965e-10	4.28984e-12	6.59172e-12	6.01831e-09	2.43984e-09	1.11537e-12	2.35829e-13	1.22593e-08	4.75281e-12	8.17179e-11	1.0042e-10	2.07708e-09
4.75154	1.8156e-11	1.04665e-13	3.97989e-10	3.88548e-11	8.16944e-12	1.42327e-12	1.66773e-12	1.59356e-10	2.87514e-12	1.45911e-12	3.52964e-10	1.73824e-08	1.5201e-06	3.50516e-08	1.15378e-08	5.39171e-14	7.05864e-07	9.90835e-08	2.9956e-08	2.91753e-07	2.15003e-10	9.51907e-13	7.28159e-09	4.92596e-08	1.59449e-08	2.83393e-09	5.12547e-08	5.09987e-08	7.33438e-13	1.15929e-07	8.16303e-09	7.11624e-09	3.07177e-08	8.74833e-09	3.98616e-08	1.58446e-08	2.30655e-11	6.59622e-10	4.71004e-12	7.23531e-12	6.43709e-09	2.62382e-09	1.22573e-12	2.5995e-13	1.30983e-08	5.18869e-12	8.85306e-11	1.08661e-10	2.24177e-09
4.78135	1.98291e-11	1.1632e-13	4.29283e-10	4.2309e-11	8.923e-12	1.55632e-12	1.83157e-12	1.7272e-10	3.16145e-12	1.6065e-12	3.82262e-10	1.8602e-08	1.60624e-06	3.75202e-08	1.24288e-08	6.00479e-14	7.42626e-07	1.05296e-07	3.21078e-08	3.09378e-07	2.3385e-10	1.05545e-12	7.81074e-09	5.25809e-08	1.70918e-08	3.04835e-09	5.46236e-08	5.45443e-08	8.09966e-13	1.22998e-07	8.72002e-09	7.61008e-09	3.26474e-08	9.33415e-09	4.24364e-08	1.68769e-08	2.52997e-11	7.10893e-10	5.17051e-12	7.94031e-12	6.88404e-09	2.82124e-09	1.34677e-12	2.86488e-13	1.39927e-08	5.66363e-12	9.58967e-11	1.17561e-10	2.41911e-09
4.81115	2.16525e-11	1.29247e-13	4.62978e-10	4.60628e-11	9.74451e-12	1.70154e-12	2.01115e-12	1.87173e-10	3.47562e-12	1.76846e-12	4.13923e-10	1.9904e-08	1.69701e-06	4.01561e-08	1.33866e-08	6.68624e-14	7.81209e-07	1.11882e-07	3.44081e-08	3.2802e-07	2.543e-10	1.17e-12	8.37697e-09	5.61178e-08	1.83181e-08	3.27847e-09	5.82049e-08	5.83264e-08	8.94309e-13	1.30483e-07	9.31379e-09	8.13702e-09	3.4694e-08	9.95792e-09	4.51712e-08	1.79741e-08	2.77458e-11	7.66044e-10	5.67502e-12	8.71245e-12	7.361e-09	3.03304e-09	1.4795e-12	3.15679e-13	1.4946e-08	6.18107e-12	1.0386e-10	1.27171e-10	2.61003e-09
4.84096	2.36394e-11	1.43582e-13	4.99254e-10	5.01416e-11	1.06399e-11	1.86001e-12	2.20795e-12	2.02804e-10	3.82029e-12	1.94637e-12	4.48132e-10	2.12939e-08	1.79263e-06	4.29701e-08	1.44158e-08	7.44354e-14	8.217e-07	1.18864e-07	3.68668e-08	3.47734e-07	2.76487e-10	1.29671e-12	8.98277e-09	5.98837e-08	1.96291e-08	3.52541e-09	6.20113e-08	6.23601e-08	9.8725e-13	1.38407e-07	9.94669e-09	8.69918e-09	3.68641e-08	1.0622e-08	4.80755e-08	1.91401e-08	3.04232e-11	8.25359e-10	6.22768e-12	9.55796e-12	7.8699e-09	3.26023e-09	1.62503e-12	3.47783e-13	1.5962e-08	6.7447e-12	1.12467e-10	1.37549e-10	2.81554e-09
4.87076	2.5804e-11	1.59474e-13	5.38302e-10	5.45729e-11	1.16158e-11	2.03292e-12	2.42359e-12	2.19705e-10	4.19836e-12	2.14179e-12	4.85089e-10	2.27772e-08	1.89336e-06	4.59739e-08	1.55217e-08	8.28495e-14	8.64185e-07	1.26262e-07	3.94944e-08	3.6858e-07	3.00552e-10	1.43684e-12	9.6308e-09	6.38927e-08	2.10304e-08	3.79034e-09	6.60565e-08	6.66613e-08	1.08964e-12	1.46794e-07	1.06212e-08	9.29883e-09	3.9165e-08	1.13289e-08	5.11596e-08	2.03792e-08	3.33535e-11	8.89145e-10	6.83298e-12	1.04836e-11	8.4128e-09	3.50389e-09	1.78457e-12	3.83086e-13	1.70447e-08	7.35856e-12	1.21769e-10	1.48751e-10	3.03671e-09
4.90056	2.81618e-11	1.77089e-13	5.80328e-10	5.93863e-11	1.2679e-11	2.22154e-12	2.65983e-12	2.37976e-10	4.61297e-12	2.35638e-12	5.25006e-10	2.436e-08	1.99945e-06	4.91795e-08	1.67098e-08	9.21963e-14	9.08759e-07	1.34102e-07	4.23018e-08	3.90618e-07	3.2665e-10	1.59178e-12	1.03239e-08	6.81599e-08	2.25278e-08	4.07453e-09	7.03546e-08	7.1247e-08	1.20243e-12	1.55672e-07	1.134e-08	9.93837e-09	4.16043e-08	1.20813e-08	5.44339e-08	2.16956e-08	3.65598e-11	9.57728e-10	7.49581e-12	1.14969e-11	8.9919e-09	3.76519e-09	1.95942e-12	4.21897e-13	1.81981e-08	8.02701e-12	1.31821e-10	1.60844e-10	3.27471e-09
4.93037	3.07296e-11	1.96611e-13	6.25555e-10	6.46138e-11	1.38374e-11	2.42728e-12	2.91859e-12	2.57725e-10	5.06758e-12	2.59199e-12	5.68114e-10	2.60487e-08	2.11117e-06	5.26001e-08	1.7986e-08	1.02577e-13	9.55517e-07	1.42409e-07	4.5301e-08	4.13913e-07	3.54948e-10	1.76306e-12	1.1065e-08	7.27012e-08	2.41277e-08	4.37934e-09	7.49208e-08	7.61351e-08	1.32664e-12	1.65068e-07	1.21058e-08	1.06204e-08	4.41898e-08	1.2882e-08	5.79099e-08	2.30941e-08	4.00676e-11	1.03146e-09	8.22151e-12	1.26059e-11	9.60952e-09	4.04533e-09	2.15102e-12	4.64559e-13	1.94268e-08	8.75478e-12	1.4268e-10	1.73894e-10	3.53075e-09
4.96017	3.35256e-11	2.18241e-13	6.7422e-10	7.02902e-11	1.50992e-11	2.65164e-12	3.20196e-12	2.79067e-10	5.56594e-12	2.85062e-12	6.1466e-10	2.78501e-08	2.22879e-06	5.62495e-08	1.93565e-08	1.14103e-13	1.00456e-06	1.51208e-07	4.85043e-08	4.38533e-07	3.85623e-10	1.95235e-12	1.18574e-08	7.75335e-08	2.58369e-08	4.70621e-09	7.97709e-08	8.13446e-08	1.4634e-12	1.7501e-07	1.29216e-08	1.13475e-08	4.693e-08	1.3734e-08	6.15992e-08	2.45795e-08	4.39046e-11	1.11071e-09	9.0159e-12	1.38193e-11	1.02681e-08	4.34565e-09	2.36095e-12	5.11445e-13	2.07355e-08	9.54703e-12	1.54411e-10	1.87977e-10	3.80616e-09
4.98997	3.65695e-11	2.42201e-13	7.26576e-10	7.64531e-11	1.64734e-11	2.89629e-12	3.51224e-12	3.02129e-10	6.11217e-12	3.13447e-12	6.6491e-10	2.97713e-08	2.35261e-06	6.01421e-08	2.0828e-08	1.269e-13	1.056e-06	1.60528e-07	5.19251e-08	4.6455e-07	4.18871e-10	2.1615e-12	1.27045e-08	8.26745e-08	2.76624e-08	5.05666e-09	8.49218e-08	8.68956e-08	1.61396e-12	1.85528e-07	1.37906e-08	1.21226e-08	4.98339e-08	1.46405e-08	6.55145e-08	2.61571e-08	4.81009e-11	1.19589e-09	9.88533e-12	1.51468e-11	1.09703e-08	4.66754e-09	2.59092e-12	5.62963e-13	2.21292e-08	1.04093e-11	1.67081e-10	2.03172e-10	4.10235e-09
5.01978	3.98826e-11	2.68737e-13	7.82896e-10	8.31429e-11	1.79697e-11	3.16299e-12	3.85193e-12	3.27043e-10	6.71074e-12	3.44594e-12	7.19149e-10	3.18201e-08	2.48294e-06	6.42937e-08	2.24078e-08	1.41102e-13	1.10993e-06	1.70397e-07	5.55774e-08	4.92038e-07	4.54898e-10	2.39255e-12	1.36098e-08	8.81431e-08	2.96118e-08	5.43235e-09	9.03913e-08	9.28094e-08	1.77967e-12	1.96656e-07	1.47162e-08	1.29488e-08	5.29107e-08	1.56048e-08	6.96691e-08	2.78323e-08	5.26893e-11	1.28742e-09	1.08367e-11	1.65989e-11	1.17189e-08	5.0125e-09	2.84278e-12	6.19563e-13	2.36131e-08	1.13477e-11	1.80763e-10	2.19563e-10	4.42084e-09
5.04958	4.34882e-11	2.98121e-13	8.43473e-10	9.04035e-11	1.95987e-11	3.4537e-12	4.22373e-12	3.53955e-10	7.36655e-12	3.78764e-12	7.77683e-10	3.40046e-08	2.62009e-06	6.87205e-08	2.41035e-08	1.56863e-13	1.16648e-06	1.80848e-07	5.94763e-08	5.21076e-07	4.93931e-10	2.64774e-12	1.45773e-08	9.39594e-08	3.16933e-08	5.83502e-09	9.61981e-08	9.91087e-08	1.96202e-12	2.08425e-07	1.57017e-08	1.38293e-08	5.61703e-08	1.66305e-08	7.40768e-08	2.9611e-08	5.77055e-11	1.38576e-09	1.18776e-11	1.81869e-11	1.25169e-08	5.38212e-09	3.11859e-12	6.81733e-13	2.5193e-08	1.23687e-11	1.95536e-10	2.37244e-10	4.76324e-09
5.07939	4.74113e-11	3.30651e-13	9.08619e-10	9.82824e-11	2.1372e-11	3.77053e-12	4.63062e-12	3.8302e-10	8.08493e-12	4.16245e-12	8.40843e-10	3.63332e-08	2.7644e-06	7.34401e-08	2.59232e-08	1.74349e-13	1.22576e-06	1.91911e-07	6.36376e-08	5.51747e-07	5.36211e-10	2.92953e-12	1.56109e-08	1.00144e-07	3.39152e-08	6.26655e-09	1.02362e-07	1.05817e-07	2.16266e-12	2.20873e-07	1.67511e-08	1.47675e-08	5.96232e-08	1.77212e-08	7.87526e-08	3.14993e-08	6.31885e-11	1.49141e-09	1.30161e-11	1.99232e-11	1.33673e-08	5.7781e-09	3.42055e-12	7.50009e-13	2.68747e-08	1.34794e-11	2.11484e-10	2.56311e-10	5.13128e-09
5.10919	5.16791e-11	3.66657e-13	9.78671e-10	1.06831e-10	2.33019e-11	4.11577e-12	5.07584e-12	4.14404e-10	8.87169e-12	4.57349e-12	9.08982e-10	3.88152e-08	2.91621e-06	7.8471e-08	2.78758e-08	1.93744e-13	1.28791e-06	2.03622e-07	6.80781e-08	5.84138e-07	5.82e-10	3.24062e-12	1.67151e-08	1.0672e-07	3.62867e-08	6.72891e-09	1.08904e-07	1.1296e-07	2.38335e-12	2.34036e-07	1.78683e-08	1.57671e-08	6.32802e-08	1.88811e-08	8.37119e-08	3.35036e-08	6.91805e-11	1.60489e-09	1.42613e-11	2.18214e-11	1.42735e-08	6.20225e-09	3.7511e-12	8.24979e-13	2.86645e-08	1.46876e-11	2.28698e-10	2.76871e-10	5.52681e-09
5.13899	5.63211e-11	4.06502e-13	1.05399e-09	1.16104e-10	2.5402e-11	4.49189e-12	5.56291e-12	4.48287e-10	9.73319e-12	5.02418e-12	9.8248e-10	4.14602e-08	3.0759e-06	8.38328e-08	2.99705e-08	2.15254e-13	1.35303e-06	2.16016e-07	7.28158e-08	6.18339e-07	6.31578e-10	3.58398e-12	1.78944e-08	1.13711e-07	3.88174e-08	7.22425e-09	1.15846e-07	1.20565e-07	2.62607e-12	2.47953e-07	1.90574e-08	1.68318e-08	6.71531e-08	2.01143e-08	8.89713e-08	3.56309e-08	7.57278e-11	1.72676e-09	1.56228e-11	2.38961e-11	1.5239e-08	6.65651e-09	4.11288e-12	9.07283e-13	3.05691e-08	1.60015e-11	2.47277e-10	2.99038e-10	5.95182e-09
5.1688	6.13692e-11	4.50586e-13	1.13495e-09	1.26162e-10	2.76869e-11	4.90161e-12	6.09568e-12	4.84863e-10	1.06763e-11	5.51824e-12	1.06175e-09	4.42785e-08	3.24384e-06	8.95462e-08	3.22172e-08	2.39103e-13	1.42129e-06	2.29131e-07	7.78696e-08	6.54446e-07	6.8525e-10	3.96288e-12	1.91537e-08	1.21141e-07	4.15175e-08	7.75481e-09	1.23211e-07	1.28659e-07	2.89296e-12	2.62667e-07	2.0323e-08	1.79659e-08	7.12539e-08	2.14253e-08	9.4548e-08	3.78883e-08	8.28803e-11	1.85763e-09	1.71113e-11	2.61634e-11	1.62676e-08	7.14295e-09	4.50875e-12	9.97622e-13	3.25957e-08	1.74302e-11	2.67324e-10	3.22933e-10	6.40841e-09
5.1986	6.68578e-11	4.9935e-13	1.22198e-09	1.37069e-10	3.01724e-11	5.34783e-12	6.67833e-12	5.24338e-10	1.17087e-11	6.05975e-12	1.14722e-09	4.72808e-08	3.42042e-06	9.56334e-08	3.46266e-08	2.6554e-13	1.4928e-06	2.43007e-07	8.32596e-08	6.9256e-07	7.43341e-10	4.3809e-12	2.04983e-08	1.29037e-07	4.43979e-08	8.32301e-09	1.31024e-07	1.37273e-07	3.18638e-12	2.78219e-07	2.16699e-08	1.91735e-08	7.55955e-08	2.28187e-08	1.0046e-07	4.02836e-08	9.06926e-11	1.99814e-09	1.87384e-11	2.86407e-11	1.73632e-08	7.66374e-09	4.94187e-12	1.09676e-12	3.47515e-08	1.89835e-11	2.88954e-10	3.48688e-10	6.89885e-09
5.22841	7.28244e-11	5.5328e-13	1.31551e-09	1.48896e-10	3.28756e-11	5.83375e-12	7.31542e-12	5.66935e-10	1.28384e-11	6.65314e-12	1.23936e-09	5.04787e-08	3.60608e-06	1.02118e-07	3.721e-08	2.94841e-13	1.56772e-06	2.57686e-07	8.90071e-08	7.32786e-07	8.06204e-10	4.842e-12	2.19337e-08	1.37427e-07	4.74699e-08	8.93143e-09	1.39311e-07	1.46439e-07	3.50889e-12	2.94656e-07	2.31029e-08	2.04593e-08	8.01915e-08	2.42996e-08	1.06728e-07	4.28247e-08	9.92241e-11	2.14897e-09	2.05165e-11	3.13468e-11	1.853e-08	8.22125e-09	5.41566e-12	1.20555e-12	3.70447e-08	2.06719e-11	3.12286e-10	3.76444e-10	7.42554e-09
5.25821	7.93094e-11	6.12912e-13	1.41602e-09	1.61716e-10	3.58152e-11	6.3628e-12	8.01192e-12	6.12893e-10	1.40745e-11	7.30327e-12	1.33869e-09	5.38844e-08	3.80123e-06	1.09023e-07	3.99795e-08	3.27307e-13	1.64621e-06	2.73212e-07	9.51348e-08	7.75233e-07	8.74216e-10	5.35048e-12	2.34657e-08	1.4634e-07	5.07458e-08	9.58279e-09	1.48099e-07	1.56189e-07	3.86331e-12	3.12026e-07	2.46274e-08	2.18281e-08	8.50561e-08	2.58734e-08	1.1337e-07	4.55202e-08	1.08539e-10	2.31087e-09	2.24594e-11	3.43025e-11	1.97725e-08	8.81795e-09	5.93383e-12	1.32489e-12	3.94835e-08	2.2507e-11	3.37452e-10	4.0635e-10	7.99108e-09
5.28801	8.63566e-11	6.78834e-13	1.52401e-09	1.75613e-10	3.90113e-11	6.93872e-12	8.77325e-12	6.6247e-10	1.54267e-11	8.01542e-12	1.44573e-09	5.75107e-08	4.00634e-06	1.16377e-07	4.29478e-08	3.63275e-13	1.72841e-06	2.89631e-07	1.01666e-07	8.20019e-07	9.47785e-10	5.9111e-12	2.51005e-08	1.55807e-07	5.42385e-08	1.028e-08	1.57417e-07	1.66559e-07	4.25272e-12	3.30379e-07	2.62491e-08	2.32851e-08	9.02043e-08	2.75454e-08	1.2041e-07	4.83792e-08	1.18708e-10	2.48462e-09	2.45818e-11	3.753e-11	2.10954e-08	9.45651e-09	6.50045e-12	1.45578e-12	4.20768e-08	2.45012e-11	3.64592e-10	4.38569e-10	8.59822e-09
5.31782	9.40133e-11	7.51696e-13	1.64003e-09	1.90672e-10	4.24857e-11	7.56556e-12	9.6053e-12	7.15941e-10	1.69056e-11	8.79535e-12	1.56108e-09	6.13714e-08	4.22187e-06	1.24207e-07	4.61287e-08	4.03113e-13	1.8145e-06	3.06991e-07	1.08628e-07	8.67264e-07	1.02735e-09	6.52907e-12	2.68448e-08	1.65862e-07	5.79616e-08	1.10262e-08	1.67294e-07	1.77588e-07	4.68051e-12	3.49769e-07	2.79739e-08	2.48357e-08	9.5652e-08	2.93217e-08	1.27869e-07	5.14111e-08	1.29806e-10	2.67105e-09	2.69001e-11	4.10539e-11	2.25037e-08	1.01398e-08	7.11993e-12	1.59933e-12	4.4834e-08	2.66679e-11	3.93855e-10	4.73275e-10	9.2499e-09
5.34762	1.02331e-10	8.32211e-13	1.76465e-09	2.0699e-10	4.6262e-11	8.24771e-12	1.05145e-11	7.73603e-10	1.85228e-11	9.64937e-12	1.68536e-09	6.54808e-08	4.44832e-06	1.32541e-07	4.95368e-08	4.47228e-13	1.90465e-06	3.25345e-07	1.16045e-07	9.17095e-07	1.11338e-09	7.2101e-12	2.87056e-08	1.76538e-07	6.19297e-08	1.18247e-08	1.77764e-07	1.89313e-07	5.15035e-12	3.70251e-07	2.98081e-08	2.64856e-08	1.01416e-07	3.12086e-08	1.35772e-07	5.4626e-08	1.41917e-10	2.87108e-09	2.94318e-11	4.49005e-11	2.40027e-08	1.08707e-08	7.79709e-12	1.75673e-12	4.7765e-08	2.90216e-11	4.25403e-10	5.10654e-10	9.94926e-09
5.37742	1.11364e-10	9.21165e-13	1.8985e-09	2.24668e-10	5.03656e-11	8.98992e-12	1.15078e-11	8.35773e-10	2.02909e-11	1.05843e-11	1.81922e-09	6.98543e-08	4.68621e-06	1.41411e-07	5.31876e-08	4.96069e-13	1.99903e-06	3.44746e-07	1.23947e-07	9.69647e-07	1.20639e-09	7.96048e-12	3.06902e-08	1.87873e-07	6.61582e-08	1.2679e-08	1.8886e-07	2.01778e-07	5.66628e-12	3.91883e-07	3.17584e-08	2.8241e-08	1.07513e-07	3.32125e-08	1.44143e-07	5.80345e-08	1.55131e-10	3.08565e-09	3.21959e-11	4.90987e-11	2.5598e-08	1.16526e-08	8.53718e-12	1.92928e-12	5.08803e-08	3.15782e-11	4.59411e-10	5.50906e-10	1.06997e-08
5.40723	1.21174e-10	1.01942e-12	2.04224e-09	2.43817e-10	5.48244e-11	9.79736e-12	1.25928e-11	9.02793e-10	2.22235e-11	1.16077e-11	1.9634e-09	7.45081e-08	4.93606e-06	1.5085e-07	5.70978e-08	5.50131e-13	2.09783e-06	3.6525e-07	1.32365e-07	1.02506e-06	1.30691e-09	8.78707e-12	3.28066e-08	1.99906e-07	7.06632e-08	1.35929e-08	2.00617e-07	2.15026e-07	6.23272e-12	4.14728e-07	3.38318e-08	3.01084e-08	1.13963e-07	3.53405e-08	1.53008e-07	6.16476e-08	1.69545e-10	3.31579e-09	3.52134e-11	5.36797e-11	2.72956e-08	1.24887e-08	9.34589e-12	2.1184e-12	5.41911e-08	3.43546e-11	4.96063e-10	5.94246e-10	1.15047e-08
5.43703	1.31824e-10	1.12794e-12	2.19657e-09	2.64556e-10	5.96681e-11	1.06756e-11	1.37778e-11	9.7503e-10	2.43357e-11	1.27275e-11	2.11865e-09	7.94594e-08	5.19844e-06	1.60893e-07	6.12849e-08	6.09959e-13	2.20125e-06	3.86917e-07	1.41329e-07	1.08348e-06	1.41554e-09	9.69743e-12	3.50632e-08	2.12676e-07	7.5462e-08	1.45703e-08	2.13072e-07	2.29105e-07	6.85449e-12	4.38849e-07	3.60358e-08	3.20945e-08	1.20784e-07	3.76e-08	1.62397e-07	6.54773e-08	1.85264e-10	3.56259e-09	3.85068e-11	5.86775e-11	2.91018e-08	1.33829e-08	1.02294e-11	2.32565e-12	5.7709e-08	3.73693e-11	5.35559e-10	6.40903e-10	1.23682e-08
5.46684	1.43385e-10	1.24775e-12	2.36228e-09	2.87012e-10	6.49292e-11	1.16307e-11	1.50719e-11	1.05288e-09	2.66436e-11	1.39529e-11	2.2858e-09	8.47262e-08	5.47393e-06	1.71576e-07	6.57678e-08	6.76155e-13	2.30949e-06	4.09809e-07	1.50874e-07	1.14505e-06	1.53291e-09	1.06998e-11	3.74688e-08	2.26227e-07	8.05728e-08	1.56155e-08	2.26266e-07	2.44062e-07	7.53687e-12	4.64315e-07	3.83783e-08	3.42066e-08	1.27997e-07	3.99988e-08	1.72339e-07	6.9536e-08	2.02405e-10	3.82723e-09	4.21006e-11	6.4129e-11	3.10233e-08	1.43389e-08	1.11946e-11	2.55273e-12	6.14464e-08	4.06422e-11	5.78115e-10	6.91123e-10	1.32942e-08
5.49664	1.55932e-10	1.38001e-12	2.54015e-09	3.11324e-10	7.06426e-11	1.26693e-11	1.64847e-11	1.13675e-09	2.91649e-11	1.52933e-11	2.46573e-09	9.03277e-08	5.76315e-06	1.82938e-07	7.05663e-08	7.4938e-13	2.42276e-06	4.33991e-07	1.61035e-07	1.20995e-06	1.6597e-09	1.18033e-11	4.00327e-08	2.40605e-07	8.60151e-08	1.67331e-08	2.40238e-07	2.59951e-07	8.2856e-12	4.91197e-07	4.08677e-08	3.64523e-08	1.35624e-07	4.25452e-08	1.82864e-07	7.38368e-08	2.21093e-10	4.11094e-09	4.60216e-11	7.00743e-11	3.30671e-08	1.53608e-08	1.22486e-11	2.8015e-12	6.54165e-08	4.41949e-11	6.2396e-10	7.45171e-10	1.4287e-08
5.52644	1.69547e-10	1.52599e-12	2.73107e-09	3.37642e-10	7.68462e-11	1.37984e-11	1.80269e-11	1.22711e-09	3.19187e-11	1.67593e-11	2.65938e-09	9.62842e-08	6.06671e-06	1.9502e-07	7.57019e-08	8.30364e-13	2.54128e-06	4.59533e-07	1.7185e-07	1.27834e-06	1.79662e-09	1.30178e-11	4.2765e-08	2.55858e-07	9.18092e-08	1.79278e-08	2.55034e-07	2.76825e-07	9.107e-12	5.19569e-07	4.35129e-08	3.88397e-08	1.43687e-07	4.52477e-08	1.94004e-07	7.83935e-08	2.41462e-10	4.41506e-09	5.02987e-11	7.65569e-11	3.52407e-08	1.6453e-08	1.33996e-11	3.07396e-12	6.96332e-08	4.80508e-11	6.73341e-10	8.03331e-10	1.53514e-08
5.55625	1.84318e-10	1.68707e-12	2.93597e-09	3.66125e-10	8.35809e-11	1.50257e-11	1.97102e-11	1.32444e-09	3.49259e-11	1.83623e-11	2.86777e-09	1.02617e-07	6.3853e-06	2.07867e-07	8.11971e-08	9.1991e-13	2.66526e-06	4.86507e-07	1.8336e-07	1.35039e-06	1.94447e-09	1.43542e-11	4.56762e-08	2.72035e-07	9.79767e-08	1.92047e-08	2.70699e-07	2.94744e-07	1.00079e-11	5.4951e-07	4.63231e-08	4.13775e-08	1.5221e-07	4.81157e-08	2.05796e-07	8.32207e-08	2.6366e-10	4.74101e-09	5.49634e-11	8.36241e-11	3.75521e-08	1.76203e-08	1.46562e-11	3.37234e-12	7.4111e-08	5.22349e-11	7.26523e-10	8.65904e-10	1.64923e-08
5.58605	2.00341e-10	1.86479e-12	3.15584e-09	3.96947e-10	9.08909e-11	1.63595e-11	2.15471e-11	1.42925e-09	3.82093e-11	2.0115e-11	3.09198e-09	1.09349e-07	6.71958e-06	2.21523e-07	8.7076e-08	1.0189e-12	2.79496e-06	5.14987e-07	1.95606e-07	1.42629e-06	2.10409e-09	1.58244e-11	4.87775e-08	2.89191e-07	1.04541e-07	2.05693e-08	2.87281e-07	3.13768e-07	1.09959e-11	5.81103e-07	4.93082e-08	4.40745e-08	1.61219e-07	5.11588e-08	2.18274e-07	8.83339e-08	2.87846e-10	5.09031e-09	6.00498e-11	9.13272e-11	4.00097e-08	1.88674e-08	1.60279e-11	3.69902e-12	7.88655e-08	5.67747e-11	7.8379e-10	9.33217e-10	1.77149e-08
5.61585	2.17717e-10	2.06081e-12	3.39175e-09	4.30295e-10	9.88241e-11	1.78089e-11	2.35513e-11	1.54211e-09	4.17934e-11	2.20307e-11	3.33317e-09	1.16505e-07	7.07028e-06	2.36037e-07	9.33642e-08	1.12831e-12	2.93061e-06	5.45055e-07	2.08633e-07	1.50623e-06	2.27637e-09	1.74414e-11	5.20806e-08	3.07382e-07	1.11525e-07	2.20273e-08	3.04831e-07	3.33962e-07	1.20792e-11	6.14433e-07	5.24788e-08	4.69404e-08	1.70738e-07	5.43874e-08	2.31477e-07	9.37492e-08	3.14194e-10	5.46458e-09	6.55951e-11	9.97218e-11	4.26223e-08	2.01998e-08	1.7525e-11	4.05665e-12	8.3913e-08	6.16996e-11	8.45447e-10	1.00562e-09	1.90248e-08
5.64566	2.3656e-10	2.27699e-12	3.64483e-09	4.66369e-10	1.07432e-10	1.93837e-11	2.57377e-11	1.66361e-09	4.57051e-11	2.41244e-11	3.59258e-09	1.24108e-07	7.43815e-06	2.5146e-07	1.00089e-07	1.24921e-12	3.07247e-06	5.76793e-07	2.2249e-07	1.59042e-06	2.46229e-09	1.92196e-11	5.55982e-08	3.26666e-07	1.18956e-07	2.3585e-08	3.23402e-07	3.55393e-07	1.32666e-11	6.49592e-07	5.58459e-08	4.99853e-08	1.80797e-07	5.78122e-08	2.45444e-07	9.94838e-08	3.42891e-10	5.86553e-09	7.16395e-11	1.08868e-10	4.53994e-08	2.16231e-08	1.91585e-11	4.44807e-12	8.92707e-08	6.70413e-11	9.11821e-10	1.08348e-09	2.04281e-08
5.67546	2.56987e-10	2.51534e-12	3.9163e-09	5.05386e-10	1.16771e-10	2.10943e-11	2.81225e-11	1.79439e-09	4.99735e-11	2.6412e-11	3.87155e-09	1.32187e-07	7.82396e-06	2.67847e-07	1.07279e-07	1.38278e-12	3.2208e-06	6.10289e-07	2.37224e-07	1.67906e-06	2.66289e-09	2.11745e-11	5.93436e-08	3.47107e-07	1.2686e-07	2.52488e-08	3.43051e-07	3.78133e-07	1.45681e-11	6.86675e-07	5.94211e-08	5.32199e-08	1.91425e-07	6.14447e-08	2.60219e-07	1.05556e-07	3.74141e-10	6.29501e-09	7.82266e-11	1.18832e-10	4.83508e-08	2.31431e-08	2.09407e-11	4.8764e-12	9.49568e-08	7.28343e-11	9.83261e-10	1.1672e-09	2.19311e-08
5.70527	2.7913e-10	2.77808e-12	4.20745e-09	5.4758e-10	1.26901e-10	2.29522e-11	3.07233e-11	1.93513e-09	5.46302e-11	2.89111e-11	4.17148e-09	1.4077e-07	8.22853e-06	2.85255e-07	1.14965e-07	1.53032e-12	3.37588e-06	6.45634e-07	2.52891e-07	1.77238e-06	2.87927e-09	2.33232e-11	6.33306e-08	3.68769e-07	1.35265e-07	2.70258e-08	3.63838e-07	4.02258e-07	1.59942e-11	7.25781e-07	6.32168e-08	5.66555e-08	2.02651e-07	6.52969e-08	2.75845e-07	1.11984e-07	4.08164e-10	6.75498e-09	8.54039e-11	1.29684e-10	5.14872e-08	2.47662e-08	2.28848e-11	5.34504e-12	1.00991e-07	7.91158e-11	1.06014e-09	1.2572e-09	2.35407e-08
5.73507	3.03126e-10	3.06766e-12	4.51969e-09	5.93201e-10	1.37886e-10	2.49698e-11	3.35592e-11	2.08658e-09	5.97096e-11	3.16408e-11	4.49392e-09	1.49885e-07	8.65268e-06	3.03745e-07	1.23181e-07	1.69324e-12	3.538e-06	6.82925e-07	2.69544e-07	1.87061e-06	3.11265e-09	2.56845e-11	6.75744e-08	3.91723e-07	1.44203e-07	2.89232e-08	3.85823e-07	4.27847e-07	1.75566e-11	7.67015e-07	6.72461e-08	6.03039e-08	2.14509e-07	6.93817e-08	2.9237e-07	1.18788e-07	4.45198e-10	7.24754e-09	9.32227e-11	1.41502e-10	5.48196e-08	2.64991e-08	2.50051e-11	5.8577e-12	1.07393e-07	8.59259e-11	1.14287e-09	1.35395e-09	2.5264e-08
5.76487	3.29127e-10	3.38675e-12	4.85448e-09	6.42519e-10	1.49799e-10	2.71604e-11	3.66509e-11	2.24951e-09	6.52489e-11	3.46216e-11	4.84048e-09	1.59566e-07	9.09731e-06	3.23379e-07	1.3196e-07	1.87312e-12	3.70745e-06	7.22263e-07	2.87244e-07	1.97399e-06	3.36429e-09	2.82788e-11	7.20904e-08	4.16042e-07	1.53705e-07	3.09489e-08	4.09072e-07	4.54984e-07	1.9268e-11	8.10486e-07	7.15227e-08	6.41779e-08	2.27032e-07	7.37124e-08	3.09842e-07	1.2599e-07	4.85504e-10	7.77492e-09	1.01739e-10	1.54368e-10	5.83599e-08	2.83491e-08	2.73171e-11	6.4184e-12	1.14184e-07	9.3308e-11	1.23188e-09	1.45794e-09	2.71089e-08
5.79468	3.57296e-10	3.73829e-12	5.21343e-09	6.95826e-10	1.62714e-10	2.95386e-11	4.0021e-11	2.42477e-09	7.12886e-11	3.78761e-11	5.21291e-09	1.69844e-07	9.56331e-06	3.44225e-07	1.41339e-07	2.07167e-12	3.88454e-06	7.63753e-07	3.06052e-07	2.08277e-06	3.63559e-09	3.11285e-11	7.68955e-08	4.41801e-07	1.63805e-07	3.31112e-08	4.33655e-07	4.83758e-07	2.11422e-11	8.5631e-07	7.60612e-08	6.82906e-08	2.40256e-07	7.83033e-08	3.28314e-07	1.33611e-07	5.2936e-10	8.33949e-09	1.11013e-10	1.68374e-10	6.21205e-08	3.03236e-08	2.98377e-11	7.03154e-12	1.21388e-07	1.01309e-10	1.32762e-09	1.56968e-09	2.90834e-08
5.82448	3.87807e-10	4.1255e-12	5.59821e-09	7.53435e-10	1.76713e-10	3.21198e-11	4.3694e-11	2.61326e-09	7.78726e-11	4.14287e-11	5.61307e-09	1.80756e-07	1.00516e-05	3.66355e-07	1.51358e-07	2.2908e-12	4.06959e-06	8.07507e-07	3.26035e-07	2.19723e-06	3.92801e-09	3.4258e-11	8.20072e-08	4.69083e-07	1.74539e-07	3.5419e-08	4.59643e-07	5.14262e-07	2.31944e-11	9.04606e-07	8.08769e-08	7.26562e-08	2.54217e-07	8.31694e-08	3.47839e-07	1.41675e-07	5.7707e-10	8.94379e-09	1.2111e-10	1.83617e-10	6.61146e-08	3.24308e-08	3.25853e-11	7.70191e-12	1.29027e-07	1.09979e-10	1.4306e-09	1.68974e-09	3.11964e-08
5.85429	4.20849e-10	4.55191e-12	6.01065e-09	8.15682e-10	1.91886e-10	3.4921e-11	4.76965e-11	2.81594e-09	8.50487e-11	4.5306e-11	6.04296e-09	1.92339e-07	1.05633e-05	3.89844e-07	1.62058e-07	2.53257e-12	4.26294e-06	8.53641e-07	3.47262e-07	2.31762e-06	4.24314e-09	3.7694e-11	8.74441e-08	4.97972e-07	1.85943e-07	3.78817e-08	4.87111e-07	5.46593e-07	2.54409e-11	9.55502e-07	8.59861e-08	7.72895e-08	2.68956e-07	8.83263e-08	3.68474e-07	1.50207e-07	6.28964e-10	9.59052e-09	1.32101e-10	2.00204e-10	7.0356e-08	3.46792e-08	3.55799e-11	8.43471e-12	1.37128e-07	1.19373e-10	1.54135e-09	1.81872e-09	3.34571e-08
5.88409	4.56626e-10	5.0214e-12	6.45267e-09	8.82931e-10	2.08327e-10	3.79605e-11	5.20573e-11	3.03385e-09	9.28684e-11	4.95367e-11	6.5047e-09	2.0463e-07	1.10993e-05	4.14769e-07	1.73483e-07	2.79928e-12	4.46492e-06	9.02276e-07	3.69805e-07	2.44425e-06	4.58268e-09	4.14657e-11	9.3226e-08	5.28558e-07	1.98059e-07	4.05092e-08	5.16141e-07	5.80855e-07	2.78999e-11	1.00913e-06	9.1406e-08	8.22062e-08	2.84514e-07	9.37909e-08	3.90281e-07	1.59232e-07	6.85396e-10	1.02826e-08	1.44063e-10	2.18249e-10	7.48596e-08	3.7078e-08	3.8843e-11	9.23562e-12	1.45716e-07	1.2955e-10	1.66042e-09	1.95726e-09	3.58755e-08
5.91389	4.95358e-10	5.53822e-12	6.92634e-09	9.5557e-10	2.2614e-10	4.12579e-11	5.68079e-11	3.26809e-09	1.01388e-10	5.41524e-11	7.00057e-09	2.17673e-07	1.16607e-05	4.41216e-07	1.8568e-07	3.09343e-12	4.67591e-06	9.5354e-07	3.93743e-07	2.57741e-06	4.94843e-09	4.56051e-11	9.93735e-08	5.60936e-07	2.10928e-07	4.33122e-08	5.46815e-07	6.17156e-07	3.05907e-11	1.06562e-06	9.71545e-08	8.74227e-08	3.00934e-07	9.95806e-08	4.13322e-07	1.68779e-07	7.46751e-10	1.1023e-08	1.5708e-10	2.37878e-10	7.96409e-08	3.96368e-08	4.23981e-11	1.01108e-11	1.5482e-07	1.40574e-10	1.78845e-09	2.10605e-09	3.84621e-08
5.9437	5.3728e-10	6.10702e-12	7.43387e-09	1.03402e-09	2.45436e-10	4.48347e-11	6.19822e-11	3.51984e-09	1.10668e-10	5.9187e-11	7.53301e-09	2.31509e-07	1.22486e-05	4.69271e-07	1.98699e-07	3.41777e-12	4.89626e-06	1.00757e-06	4.19157e-07	2.71742e-06	5.34236e-09	5.01468e-11	1.05909e-07	5.95204e-07	2.24595e-07	4.63017e-08	5.79221e-07	6.55611e-07	3.35348e-11	1.12513e-06	1.03251e-07	9.29566e-08	3.18261e-07	1.05714e-07	4.37663e-07	1.78874e-07	8.13446e-10	1.18151e-08	1.71241e-10	2.59224e-10	8.47163e-08	4.23659e-08	4.62707e-11	1.1067e-11	1.6447e-07	1.52512e-10	1.92606e-09	2.26582e-09	4.1228e-08
5.9735	5.82647e-10	6.73291e-12	7.9776e-09	1.11873e-09	2.66334e-10	4.87139e-11	6.76173e-11	3.79036e-09	1.20775e-10	6.46774e-11	8.10462e-09	2.46186e-07	1.28641e-05	4.99027e-07	2.12592e-07	3.77533e-12	5.12637e-06	1.0645e-06	4.46133e-07	2.86461e-06	5.76654e-09	5.51291e-11	1.12855e-07	6.31468e-07	2.39105e-07	4.94898e-08	6.13451e-07	6.96339e-07	3.67553e-11	1.18781e-06	1.09715e-07	9.88262e-08	3.36543e-07	1.12211e-07	4.63374e-07	1.8955e-07	8.85931e-10	1.26622e-08	1.86645e-10	2.82436e-10	9.01032e-08	4.52761e-08	5.04884e-11	1.21115e-11	1.74696e-07	1.6544e-10	2.07397e-09	2.43735e-09	4.41852e-08
6.0033	6.31733e-10	7.42147e-12	8.56005e-09	1.21019e-09	2.88965e-10	5.29203e-11	7.37531e-11	4.08101e-09	1.3178e-10	7.06638e-11	8.71817e-09	2.61752e-07	1.35086e-05	5.30583e-07	2.27415e-07	4.16942e-12	5.36664e-06	1.12447e-06	4.74762e-07	3.01931e-06	6.22321e-09	6.05933e-11	1.20237e-07	6.69836e-07	2.5451e-07	5.28891e-08	6.49602e-07	7.39468e-07	4.02775e-11	1.25381e-06	1.16569e-07	1.05051e-07	3.55831e-07	1.19091e-07	4.90529e-07	2.00837e-07	9.64693e-10	1.35683e-08	2.03397e-10	3.07669e-10	9.582e-08	4.8379e-08	5.50812e-11	1.32523e-11	1.85531e-07	1.79436e-10	2.23292e-09	2.62149e-09	4.73464e-08
6.03311	6.84835e-10	8.17883e-12	9.18389e-09	1.30891e-09	3.13468e-10	5.74808e-11	8.04332e-11	4.39323e-09	1.4376e-10	7.71897e-11	9.37663e-09	2.78257e-07	1.41831e-05	5.64041e-07	2.43228e-07	4.60369e-12	5.61748e-06	1.18765e-06	5.05139e-07	3.1819e-06	6.71476e-09	6.65848e-11	1.2808e-07	7.10425e-07	2.7086e-07	5.6513e-08	6.87776e-07	7.85131e-07	4.4129e-11	1.32331e-06	1.23834e-07	1.11651e-07	3.76177e-07	1.26377e-07	5.19204e-07	2.12769e-07	1.05026e-09	1.4537e-08	2.21612e-10	3.35096e-10	1.01886e-07	5.16869e-08	6.00815e-11	1.4498e-11	1.9701e-07	1.94588e-10	2.40371e-09	2.81912e-09	5.0725e-08
6.06291	7.4227e-10	9.01171e-12	9.85201e-09	1.41546e-09	3.39993e-10	6.24244e-11	8.77048e-11	4.72857e-09	1.568e-10	8.43024e-11	1.00832e-08	2.95756e-07	1.4889e-05	5.99509e-07	2.60092e-07	5.08212e-12	5.87933e-06	1.25419e-06	5.37365e-07	3.35275e-06	7.24375e-09	7.3153e-11	1.36412e-07	7.53356e-07	2.8821e-07	6.03757e-08	7.28079e-07	8.33466e-07	4.83398e-11	1.39647e-06	1.31534e-07	1.18649e-07	3.97637e-07	1.34091e-07	5.49481e-07	2.25381e-07	1.1432e-09	1.55728e-08	2.41413e-10	3.64901e-10	1.08322e-07	5.52128e-08	6.55247e-11	1.58581e-11	2.09169e-07	2.10987e-10	2.58719e-09	3.03122e-09	5.43353e-08
6.09272	8.04381e-10	9.92744e-12	1.05674e-08	1.53043e-09	3.68702e-10	6.77825e-11	9.56191e-11	5.08867e-09	1.70991e-10	9.20531e-11	1.08412e-08	3.14305e-07	1.56277e-05	6.37103e-07	2.78075e-07	5.60909e-12	6.15262e-06	1.32427e-06	5.71547e-07	3.53224e-06	7.81291e-09	8.03519e-11	1.45262e-07	7.98757e-07	3.06619e-07	6.44923e-08	7.70623e-07	8.84622e-07	5.29424e-11	1.47347e-06	1.39695e-07	1.26067e-07	4.20268e-07	1.42258e-07	5.81444e-07	2.38711e-07	1.24412e-09	1.668e-08	2.62935e-10	3.97285e-10	1.15149e-07	5.89704e-08	7.14488e-11	1.73426e-11	2.22047e-07	2.28735e-10	2.78429e-09	3.25879e-09	5.81926e-08
6.12252	8.71535e-10	1.09341e-11	1.13335e-08	1.65449e-09	3.99771e-10	7.35888e-11	1.04231e-10	5.4753e-09	1.8643e-10	1.00497e-10	1.16543e-08	3.33964e-07	1.64004e-05	6.76942e-07	2.97247e-07	6.1894e-12	6.43784e-06	1.39805e-06	6.07796e-07	3.72078e-06	8.42519e-09	8.82402e-11	1.5466e-07	8.46761e-07	3.26148e-07	6.88787e-08	8.15525e-07	9.38752e-07	5.79723e-11	1.55452e-06	1.48342e-07	1.33929e-07	4.44131e-07	1.50902e-07	6.15183e-07	2.52797e-07	1.3537e-09	1.78634e-08	2.86323e-10	4.32464e-10	1.22391e-07	6.29745e-08	7.78954e-11	1.89629e-11	2.35685e-07	2.47939e-10	2.99597e-09	3.50294e-09	6.23129e-08
6.15232	9.44131e-10	1.20404e-11	1.21535e-08	1.78831e-09	4.33386e-10	7.98799e-11	1.13602e-10	5.89035e-09	2.03225e-10	1.09696e-10	1.25263e-08	3.54795e-07	1.72088e-05	7.19153e-07	3.17682e-07	6.82832e-12	6.73544e-06	1.47571e-06	6.46232e-07	3.9188e-06	9.0837e-09	9.6882e-11	1.64639e-07	8.9751e-07	3.4686e-07	7.3552e-08	8.62907e-07	9.96019e-07	6.34683e-11	1.6398e-06	1.57503e-07	1.4226e-07	4.6929e-07	1.60051e-07	6.50791e-07	2.67681e-07	1.47265e-09	1.9128e-08	3.11734e-10	4.70672e-10	1.30071e-07	6.72406e-08	8.49092e-11	2.0731e-11	2.50124e-07	2.68715e-10	3.2233e-09	3.76483e-09	6.67135e-08
6.18213	1.02259e-09	1.32561e-11	1.30314e-08	1.93265e-09	4.69752e-10	8.66951e-11	1.23797e-10	6.33582e-09	2.21491e-10	1.19713e-10	1.34614e-08	3.76866e-07	1.80542e-05	7.6387e-07	3.39459e-07	7.5316e-12	7.04595e-06	1.55746e-06	6.86977e-07	4.12674e-06	9.79182e-09	1.06347e-10	1.75232e-07	9.51152e-07	3.68824e-07	7.853e-08	9.129e-07	1.05659e-06	6.94724e-11	1.72953e-06	1.67208e-07	1.51087e-07	4.95812e-07	1.69733e-07	6.88366e-07	2.83405e-07	1.60175e-09	2.04793e-08	3.39337e-10	5.12163e-10	1.38215e-07	7.1785e-08	9.25389e-11	2.26599e-11	2.6541e-07	2.91189e-10	3.4674e-09	4.04571e-09	7.14125e-08
6.21193	1.10738e-09	1.45916e-11	1.39709e-08	2.0883e-09	5.09086e-10	9.40769e-11	1.34886e-10	6.81387e-09	2.41353e-10	1.30621e-10	1.44639e-08	4.00246e-07	1.89381e-05	8.11233e-07	3.62662e-07	8.30557e-12	7.36986e-06	1.64349e-06	7.30162e-07	4.34506e-06	1.05531e-08	1.16712e-10	1.86476e-07	1.00784e-06	3.92111e-07	8.38318e-08	9.65637e-07	1.12066e-06	7.60302e-11	1.82393e-06	1.77487e-07	1.60438e-07	5.23767e-07	1.79977e-07	7.28012e-07	3.00014e-07	1.74183e-09	2.19229e-08	3.69315e-10	5.5721e-10	1.4685e-07	7.66253e-08	1.00837e-10	2.47641e-11	2.8159e-07	3.15497e-10	3.72945e-09	4.3469e-09	7.64293e-08
6.24173	1.19899e-09	1.60586e-11	1.49764e-08	2.25612e-09	5.51624e-10	1.02071e-10	1.46946e-10	7.32679e-09	2.62946e-10	1.42496e-10	1.55385e-08	4.25008e-07	1.98624e-05	8.61391e-07	3.8738e-07	9.15714e-12	7.70771e-06	1.73402e-06	7.75927e-07	4.57425e-06	1.13714e-08	1.2806e-10	1.98408e-07	1.06774e-06	4.16797e-07	8.94775e-08	1.02126e-06	1.18839e-06	8.31915e-11	1.92321e-06	1.88373e-07	1.70343e-07	5.53229e-07	1.90814e-07	7.69837e-07	3.17557e-07	1.8938e-09	2.3465e-08	4.01868e-10	6.06108e-10	1.56005e-07	8.178e-08	1.09861e-10	2.70589e-11	2.98713e-07	3.41783e-10	4.01075e-09	4.66984e-09	8.17844e-08
6.27154	1.29795e-09	1.76695e-11	1.60524e-08	2.43705e-09	5.97619e-10	1.10727e-10	1.6006e-10	7.87704e-09	2.86417e-10	1.5542e-10	1.66903e-08	4.5123e-07	2.08285e-05	9.14498e-07	4.13706e-07	1.00939e-11	8.06007e-06	1.82925e-06	8.24414e-07	4.81481e-06	1.22508e-08	1.40481e-10	2.11068e-07	1.13103e-06	4.4296e-07	9.54885e-08	1.07992e-06	1.26e-06	9.10104e-11	2.02763e-06	1.999e-07	1.80833e-07	5.84276e-07	2.02278e-07	8.13954e-07	3.36083e-07	2.05863e-09	2.5112e-08	4.37209e-10	6.59177e-10	1.65708e-07	8.72686e-08	1.19672e-10	2.95612e-11	3.16833e-07	3.70205e-10	4.31267e-09	5.01603e-09	8.74996e-08
6.30134	1.40484e-09	1.94383e-11	1.72037e-08	2.63206e-09	6.47344e-10	1.20099e-10	1.74319e-10	8.46722e-09	3.11924e-10	1.69486e-10	1.79245e-08	4.78993e-07	2.18382e-05	9.70719e-07	4.41738e-07	1.11241e-11	8.4275e-06	1.92943e-06	8.75779e-07	5.06726e-06	1.31957e-08	1.54073e-10	2.24498e-07	1.19787e-06	4.70684e-07	1.01887e-07	1.14177e-06	1.33569e-06	9.95456e-11	2.13742e-06	2.12104e-07	1.91941e-07	6.16987e-07	2.14403e-07	8.60483e-07	3.55645e-07	2.23737e-09	2.68709e-08	4.7557e-10	7.16761e-10	1.75993e-07	9.31119e-08	1.30338e-10	3.22893e-11	3.36004e-07	4.00933e-10	4.63667e-09	5.38709e-09	9.35981e-08
6.33115	1.52025e-09	2.13799e-11	1.84353e-08	2.84223e-09	7.01092e-10	1.30242e-10	1.8982e-10	9.10014e-09	3.39638e-10	1.84789e-10	1.92468e-08	5.08382e-07	2.28934e-05	1.03023e-06	4.71582e-07	1.22569e-11	8.8106e-06	2.03478e-06	9.3018e-07	5.33214e-06	1.42108e-08	1.68944e-10	2.38743e-07	1.26847e-06	5.00057e-07	1.08698e-07	1.20697e-06	1.41567e-06	1.08861e-10	2.25286e-06	2.25022e-07	2.03702e-07	6.51449e-07	2.27225e-07	9.09549e-07	3.76298e-07	2.43117e-09	2.87488e-08	5.17201e-10	7.79234e-10	1.86891e-07	9.93318e-08	1.4193e-10	3.52631e-11	3.56285e-07	4.34147e-10	4.98431e-09	5.78476e-09	1.00104e-07
6.36095	1.64487e-09	2.35109e-11	1.97527e-08	3.06869e-09	7.5918e-10	1.41221e-10	2.06668e-10	9.77877e-09	3.69745e-10	2.01436e-10	2.06633e-08	5.39489e-07	2.39958e-05	1.0932e-06	5.03349e-07	1.35022e-11	9.20999e-06	2.14557e-06	9.87786e-07	5.61003e-06	1.5301e-08	1.8521e-10	2.5385e-07	1.34302e-06	5.31171e-07	1.15946e-07	1.27569e-06	1.50018e-06	1.19026e-10	2.37421e-06	2.38696e-07	2.16151e-07	6.8775e-07	2.40783e-07	9.61281e-07	3.98101e-07	2.64124e-09	3.07537e-08	5.62371e-10	8.46998e-10	1.98439e-07	1.05952e-07	1.54527e-10	3.85041e-11	3.77735e-07	4.70045e-10	5.35729e-09	6.21087e-09	1.07044e-07
6.39075	1.77939e-09	2.58492e-11	2.11618e-08	3.31266e-09	8.21948e-10	1.53101e-10	2.24979e-10	1.05063e-08	4.02444e-10	2.19541e-10	2.21805e-08	5.72407e-07	2.51475e-05	1.15983e-06	5.37156e-07	1.48709e-11	9.6263e-06	2.26205e-06	1.04878e-06	5.90152e-06	1.64717e-08	2.02998e-10	2.69867e-07	1.42173e-06	5.64124e-07	1.23658e-07	1.34812e-06	1.58946e-06	1.30116e-10	2.50175e-06	2.53167e-07	2.29328e-07	7.25982e-07	2.55116e-07	1.01582e-06	4.21113e-07	2.86891e-09	3.28937e-08	6.11373e-10	9.20486e-10	2.10674e-07	1.12996e-07	1.68214e-10	4.20357e-11	4.00421e-07	5.08837e-10	5.75738e-09	6.66739e-09	1.14446e-07
6.42056	1.92457e-09	2.84145e-11	2.26688e-08	3.57545e-09	8.8976e-10	1.65954e-10	2.44877e-10	1.12861e-08	4.37952e-10	2.39228e-10	2.38052e-08	6.07237e-07	2.63503e-05	1.23032e-06	5.73125e-07	1.63748e-11	1.00602e-05	2.38449e-06	1.11334e-06	6.20722e-06	1.77285e-08	2.22448e-10	2.86847e-07	1.50481e-06	5.99017e-07	1.31862e-07	1.42443e-06	1.68375e-06	1.42213e-10	2.63578e-06	2.68479e-07	2.43272e-07	7.66245e-07	2.70268e-07	1.07331e-06	4.454e-07	3.1156e-09	3.51777e-08	6.64521e-10	1.00017e-09	2.23635e-07	1.20492e-07	1.83083e-10	4.58832e-11	4.24408e-07	5.50751e-10	6.18649e-09	7.15642e-09	1.22338e-07
6.45036	2.08123e-09	3.12284e-11	2.42802e-08	3.85848e-09	9.63011e-10	1.79858e-10	2.66496e-10	1.21218e-08	4.76502e-10	2.60631e-10	2.55448e-08	6.44083e-07	2.76064e-05	1.30488e-06	6.11389e-07	1.8027e-11	1.05124e-05	2.51318e-06	1.18166e-06	6.52778e-06	1.90776e-08	2.43708e-10	3.04845e-07	1.5925e-06	6.35959e-07	1.40589e-07	1.50483e-06	1.78332e-06	1.55405e-10	2.77662e-06	2.84679e-07	2.58026e-07	8.08639e-07	2.86282e-07	1.13389e-06	4.71028e-07	3.38284e-09	3.7615e-08	7.22155e-10	1.08655e-09	2.37363e-07	1.28466e-07	1.99233e-10	5.00743e-11	4.49768e-07	5.96031e-10	6.64668e-09	7.68018e-09	1.30752e-07
6.48017	2.25025e-09	3.43141e-11	2.60032e-08	4.16325e-09	1.04212e-09	1.94896e-10	2.8998e-10	1.30172e-08	5.18347e-10	2.83896e-10	2.7407e-08	6.83055e-07	2.8918e-05	1.38373e-06	6.52085e-07	1.98417e-11	1.09835e-05	2.64843e-06	1.25396e-06	6.86386e-06	2.05255e-08	2.66943e-10	3.23917e-07	1.68504e-06	6.75062e-07	1.49871e-07	1.58952e-06	1.88844e-06	1.6979e-10	2.92458e-06	3.01816e-07	2.73635e-07	8.53274e-07	3.03207e-07	1.19774e-06	4.98068e-07	3.6723e-09	4.02155e-08	7.84642e-10	1.18017e-09	2.51901e-07	1.36947e-07	2.16771e-10	5.46387e-11	4.76576e-07	6.44941e-10	7.14012e-09	8.24107e-09	1.3972e-07
6.50997	2.43258e-09	3.76975e-11	2.78451e-08	4.49138e-09	1.12755e-09	2.11159e-10	3.15489e-10	1.39765e-08	5.63761e-10	3.09179e-10	2.94002e-08	7.24269e-07	3.02872e-05	1.4671e-06	6.9536e-07	2.18345e-11	1.14743e-05	2.79052e-06	1.33046e-06	7.21616e-06	2.2079e-08	2.92329e-10	3.44125e-07	1.78266e-06	7.16446e-07	1.5974e-07	1.67871e-06	1.99941e-06	1.85472e-10	3.08e-06	3.19941e-07	2.90147e-07	9.00259e-07	3.2109e-07	1.26501e-06	5.26594e-07	3.98574e-09	4.29898e-08	8.52377e-10	1.28163e-09	2.67296e-07	1.45968e-07	2.35814e-10	5.96089e-11	5.04909e-07	6.97764e-10	7.66915e-09	8.84161e-09	1.49277e-07
6.53977	2.62922e-09	4.14064e-11	2.98141e-08	4.8446e-09	1.21979e-09	2.28742e-10	3.43193e-10	1.50041e-08	6.13036e-10	3.3665e-10	3.15332e-08	7.67847e-07	3.17163e-05	1.55523e-06	7.41367e-07	2.40223e-11	1.19856e-05	2.9398e-06	1.41136e-06	7.58541e-06	2.37455e-08	3.20062e-10	3.65533e-07	1.88565e-06	7.60236e-07	1.70232e-07	1.77262e-06	2.11653e-06	2.02565e-10	3.24324e-06	3.3911e-07	3.07609e-07	9.49714e-07	3.39984e-07	1.33587e-06	5.56684e-07	4.3251e-09	4.5949e-08	9.25788e-10	1.39156e-09	2.83597e-07	1.5556e-07	2.56487e-10	6.502e-11	5.34852e-07	7.54806e-10	8.23625e-09	9.48453e-09	1.59461e-07
6.56958	2.84126e-09	4.54713e-11	3.19187e-08	5.22477e-09	1.31936e-09	2.47752e-10	3.73275e-10	1.61045e-08	6.66493e-10	3.66493e-10	3.38155e-08	8.13917e-07	3.32077e-05	1.64839e-06	7.90269e-07	2.64237e-11	1.25182e-05	3.0966e-06	1.49693e-06	7.97235e-06	2.5533e-08	3.50349e-10	3.88207e-07	1.99428e-06	8.06562e-07	1.81386e-07	1.8715e-06	2.24011e-06	2.21192e-10	3.41465e-06	3.59379e-07	3.26075e-07	1.00176e-06	3.59943e-07	1.41052e-06	5.88419e-07	4.69243e-09	4.91049e-08	1.00533e-09	1.51064e-09	3.00853e-07	1.65758e-07	2.78926e-10	7.09101e-11	5.66489e-07	8.16394e-10	8.84407e-09	1.01727e-08	1.70311e-07
6.59938	3.06986e-09	4.99257e-11	3.41678e-08	5.63387e-09	1.42682e-09	2.68299e-10	4.05937e-10	1.72829e-08	7.24474e-10	3.98906e-10	3.62572e-08	8.62613e-07	3.47638e-05	1.74683e-06	8.42237e-07	2.9059e-11	1.30728e-05	3.26127e-06	1.58741e-06	8.37776e-06	2.74497e-08	3.8342e-10	4.12219e-07	2.10883e-06	8.55563e-07	1.93241e-07	1.97558e-06	2.37049e-06	2.41487e-10	3.59463e-06	3.80809e-07	3.456e-07	1.05653e-06	3.81025e-07	1.48914e-06	6.21885e-07	5.08997e-09	5.24702e-08	1.09151e-09	1.63961e-09	3.19119e-07	1.76598e-07	3.03278e-10	7.73204e-11	5.99913e-07	8.82881e-10	9.49547e-09	1.09092e-08	1.81867e-07
6.62918	3.31629e-09	5.48056e-11	3.65712e-08	6.07403e-09	1.54279e-09	2.90504e-10	4.41393e-10	1.85444e-08	7.87349e-10	4.34104e-10	3.88688e-08	9.14076e-07	3.63873e-05	1.85086e-06	8.97454e-07	3.19503e-11	1.36504e-05	3.43418e-06	1.68305e-06	8.80248e-06	2.95047e-08	4.19522e-10	4.37643e-07	2.2296e-06	9.07385e-07	2.05839e-07	2.08512e-06	2.50801e-06	2.63596e-10	3.78358e-06	4.03462e-07	3.6624e-07	1.11416e-06	4.03289e-07	1.57192e-06	6.57172e-07	5.52011e-09	5.60583e-08	1.18485e-09	1.77926e-09	3.38452e-07	1.88121e-07	3.29701e-10	8.42957e-11	6.35218e-07	9.54646e-10	1.01935e-08	1.16973e-08	1.94174e-07
6.65899	3.58187e-09	6.0151e-11	3.91392e-08	6.54754e-09	1.66792e-09	3.14498e-10	4.79878e-10	1.98947e-08	8.55519e-10	4.72318e-10	4.16618e-08	9.68455e-07	3.80807e-05	1.96075e-06	9.5611e-07	3.51218e-11	1.42516e-05	3.61571e-06	1.78415e-06	9.24733e-06	3.17074e-08	4.58925e-10	4.64557e-07	2.35693e-06	9.62178e-07	2.19224e-07	2.2004e-06	2.65305e-06	2.87675e-10	3.98191e-06	4.27405e-07	3.88057e-07	1.17478e-06	4.26799e-07	1.65909e-06	6.94375e-07	5.98543e-09	5.98834e-08	1.28594e-09	1.93045e-09	3.58911e-07	2.00367e-07	3.58368e-10	9.18845e-11	6.72506e-07	1.0321e-09	1.09413e-08	1.25404e-08	2.07277e-07
6.68879	3.86804e-09	6.60048e-11	4.18827e-08	7.05685e-09	1.8029e-09	3.40421e-10	5.21645e-10	2.13399e-08	9.29414e-10	5.13799e-10	4.46483e-08	1.0259e-06	3.98468e-05	2.07682e-06	1.01841e-06	3.86e-11	1.48776e-05	3.80627e-06	1.89099e-06	9.7132e-06	3.40681e-08	5.0192e-10	4.93044e-07	2.49113e-06	1.0201e-06	2.33443e-07	2.32168e-06	2.80597e-06	3.13897e-10	4.19005e-06	4.52708e-07	4.11113e-07	1.23855e-06	4.51621e-07	1.75085e-06	7.33591e-07	6.4887e-09	6.39604e-08	1.39539e-09	2.09411e-09	3.80559e-07	2.13378e-07	3.89462e-10	1.00139e-10	7.11882e-07	1.11568e-09	1.17424e-08	1.34424e-08	2.21227e-07
6.7186	4.17635e-09	7.24143e-11	4.48134e-08	7.60456e-09	1.94849e-09	3.68423e-10	5.66967e-10	2.28863e-08	1.0095e-09	5.58818e-10	4.78411e-08	1.08659e-06	4.16883e-05	2.1994e-06	1.08456e-06	4.24135e-11	1.55291e-05	4.00626e-06	2.00388e-06	1.0201e-05	3.65975e-08	5.48825e-10	5.2319e-07	2.63255e-06	1.08133e-06	2.48547e-07	2.44926e-06	2.96719e-06	3.42445e-10	4.40847e-06	4.79445e-07	4.35477e-07	1.30561e-06	4.77825e-07	1.84745e-06	7.74925e-07	7.03291e-09	6.83055e-08	1.51388e-09	2.27123e-09	4.03462e-07	2.27202e-07	4.23184e-10	1.09117e-10	7.53457e-07	1.20585e-09	1.26004e-08	1.44071e-08	2.36075e-07
6.7484	4.50846e-09	7.94308e-11	4.79436e-08	8.19347e-09	2.1055e-09	3.98667e-10	6.1614e-10	2.45408e-08	1.09628e-09	6.07667e-10	5.1254e-08	1.15068e-06	4.36082e-05	2.32883e-06	1.15478e-06	4.65939e-11	1.62072e-05	4.21613e-06	2.12313e-06	1.07117e-05	3.93072e-08	5.99984e-10	5.55087e-07	2.78157e-06	1.14603e-06	2.64587e-07	2.58345e-06	3.13711e-06	3.73521e-10	4.63762e-06	5.07693e-07	4.61217e-07	1.37614e-06	5.05484e-07	1.9491e-06	8.18486e-07	7.62126e-09	7.29355e-08	1.64212e-09	2.46288e-09	4.27691e-07	2.41886e-07	4.5975e-10	1.18879e-10	7.97346e-07	1.30313e-09	1.35193e-08	1.54388e-08	2.51876e-07
6.7782	4.86612e-09	8.71103e-11	5.12867e-08	8.82659e-09	2.2748e-09	4.31326e-10	6.69484e-10	2.63105e-08	1.1903e-09	6.60661e-10	5.49015e-08	1.21835e-06	4.56094e-05	2.46547e-06	1.22932e-06	5.11753e-11	1.69129e-05	4.43632e-06	2.24908e-06	1.12463e-05	4.22094e-08	6.5577e-10	5.88829e-07	2.93855e-06	1.2144e-06	2.81619e-07	2.72456e-06	3.31618e-06	4.07342e-10	4.87801e-06	5.37532e-07	4.88408e-07	1.4503e-06	5.34676e-07	2.05608e-06	8.64387e-07	8.25721e-09	7.78684e-08	1.78089e-09	2.67021e-09	4.53317e-07	2.57482e-07	4.99394e-10	1.29492e-10	8.43673e-07	1.40805e-09	1.45033e-08	1.65419e-08	2.68688e-07
6.80801	5.25125e-09	9.55137e-11	5.48565e-08	9.50712e-09	2.45732e-09	4.66587e-10	7.27345e-10	2.82033e-08	1.29213e-09	7.18141e-10	5.87991e-08	1.2898e-06	4.76952e-05	2.6097e-06	1.30843e-06	5.61953e-11	1.76471e-05	4.6673e-06	2.38209e-06	1.18057e-05	4.53172e-08	7.16589e-10	6.24518e-07	3.10391e-06	1.28662e-06	2.99702e-07	2.87293e-06	3.50485e-06	4.44144e-10	5.13015e-06	5.69049e-07	5.17128e-07	1.52827e-06	5.6548e-07	2.16864e-06	9.12748e-07	8.94446e-09	8.31233e-08	1.93103e-09	2.89446e-09	4.8042e-07	2.74043e-07	5.42367e-10	1.41029e-10	8.92565e-07	1.52121e-09	1.55568e-08	1.77212e-08	2.86573e-07
6.83781	5.66588e-09	1.04708e-10	5.86682e-08	1.02385e-08	2.65405e-09	5.04652e-10	7.90096e-10	3.02273e-08	1.40241e-09	7.80475e-10	6.29632e-08	1.36521e-06	4.98686e-05	2.76191e-06	1.39236e-06	6.16945e-11	1.84109e-05	4.90958e-06	2.52252e-06	1.23912e-05	4.86445e-08	7.8288e-10	6.6226e-07	3.27805e-06	1.3629e-06	3.18897e-07	3.02891e-06	3.70361e-06	4.84181e-10	5.39457e-06	6.02332e-07	5.47457e-07	1.61023e-06	5.97981e-07	2.28705e-06	9.63694e-07	9.68701e-09	8.87203e-08	2.09343e-09	3.13697e-09	5.0908e-07	2.91628e-07	5.88942e-10	1.53567e-10	9.44157e-07	1.64324e-09	1.66846e-08	1.89818e-08	3.05596e-07
6.86761	6.11218e-09	1.14764e-10	6.27376e-08	1.10244e-08	2.86608e-09	5.45738e-10	8.5814e-10	3.23912e-08	1.52181e-09	8.4806e-10	6.74113e-08	1.44481e-06	5.2133e-05	2.92251e-06	1.48139e-06	6.77175e-11	1.92054e-05	5.16365e-06	2.67077e-06	1.30037e-05	5.22061e-08	8.55119e-10	7.02165e-07	3.46141e-06	1.44345e-06	3.39269e-07	3.19285e-06	3.91294e-06	5.2773e-10	5.67183e-06	6.37477e-07	5.79482e-07	1.69638e-06	6.32269e-07	2.41161e-06	1.01736e-06	1.04891e-08	9.46809e-08	2.26908e-09	3.39918e-09	5.39383e-07	3.10297e-07	6.3941e-10	1.67191e-10	9.9859e-07	1.7748e-09	1.78918e-08	2.03291e-08	3.25826e-07
6.89742	6.59249e-09	1.25762e-10	6.70816e-08	1.18687e-08	3.09454e-09	5.90077e-10	9.31915e-10	3.47044e-08	1.65106e-09	9.21323e-10	7.21621e-08	1.52881e-06	5.44918e-05	3.09194e-06	1.57581e-06	7.43125e-11	2.00318e-05	5.43004e-06	2.82723e-06	1.36444e-05	5.60178e-08	9.33823e-10	7.4435e-07	3.65445e-06	1.5285e-06	3.60888e-07	3.36514e-06	4.13337e-06	5.75091e-10	5.96251e-06	6.7458e-07	6.13292e-07	1.78692e-06	6.68437e-07	2.5426e-06	1.07387e-06	1.13554e-08	1.01028e-07	2.459e-09	3.68263e-09	5.71418e-07	3.30112e-07	6.94091e-10	1.81993e-10	1.05601e-06	1.91662e-09	1.91837e-08	2.17688e-08	3.47334e-07
6.92722	7.10932e-09	1.37788e-10	7.17183e-08	1.27756e-08	3.34068e-09	6.37919e-10	1.01189e-09	3.71766e-08	1.79095e-09	1.00073e-09	7.72353e-08	1.61742e-06	5.69485e-05	3.27066e-06	1.67593e-06	8.15325e-11	2.08912e-05	5.70933e-06	2.99233e-06	1.43145e-05	6.00962e-08	1.01955e-09	7.88937e-07	3.85764e-06	1.61828e-06	3.83826e-07	3.54618e-06	4.36545e-06	6.26587e-10	6.26721e-06	7.13748e-07	6.48982e-07	1.88206e-06	7.06583e-07	2.68036e-06	1.13339e-06	1.22909e-08	1.07785e-07	2.66432e-09	3.98898e-09	6.05281e-07	3.51143e-07	7.53323e-10	1.98071e-10	1.11658e-06	2.06949e-09	2.05662e-08	2.33069e-08	3.70199e-07
6.95703	7.66533e-09	1.50934e-10	7.66667e-08	1.37496e-08	3.60582e-09	6.89533e-10	1.09858e-09	3.98185e-08	1.94233e-09	1.08677e-09	8.26518e-08	1.71091e-06	5.95067e-05	3.45913e-06	1.78208e-06	8.94347e-11	2.17848e-05	6.00207e-06	3.16651e-06	1.50153e-05	6.44593e-08	1.11291e-09	8.36056e-07	4.07149e-06	1.71304e-06	4.0816e-07	3.73636e-06	4.60975e-06	6.82569e-10	6.58656e-06	7.55087e-07	6.8665e-07	1.98202e-06	7.4681e-07	2.8252e-06	1.19605e-06	1.33008e-08	1.14978e-07	2.88625e-09	4.32003e-09	6.41072e-07	3.73459e-07	8.17478e-10	2.15534e-10	1.18045e-06	2.23423e-09	2.20453e-08	2.49501e-08	3.94501e-07
6.98683	8.26339e-09	1.65302e-10	8.19471e-08	1.47956e-08	3.89138e-09	7.45207e-10	1.19253e-09	4.26411e-08	2.1061e-09	1.17999e-09	8.8434e-08	1.8095e-06	6.21703e-05	3.65786e-06	1.89458e-06	9.80819e-11	2.27138e-05	6.30887e-06	3.35025e-06	1.57481e-05	6.91258e-08	1.21455e-09	8.8584e-07	4.29651e-06	1.81304e-06	4.3397e-07	3.93614e-06	4.86685e-06	7.43416e-10	6.92122e-06	7.98713e-07	7.264e-07	2.08703e-06	7.89226e-07	2.97747e-06	1.26202e-06	1.43908e-08	1.22634e-07	3.12609e-09	4.67768e-09	6.78895e-07	3.97136e-07	8.8695e-10	2.34495e-10	1.2478e-06	2.41175e-09	2.36277e-08	2.67052e-08	4.20326e-07
7.01663	8.90658e-09	1.81004e-10	8.75813e-08	1.59186e-08	4.19888e-09	8.05251e-10	1.29433e-09	4.56564e-08	2.28325e-09	1.28096e-09	9.46054e-08	1.91347e-06	6.49431e-05	3.86737e-06	2.0138e-06	1.07542e-10	2.36796e-05	6.63035e-06	3.54403e-06	1.65141e-05	7.4116e-08	1.3252e-09	9.38432e-07	4.53325e-06	1.91854e-06	4.61342e-07	4.14594e-06	5.13739e-06	8.09538e-10	7.27186e-06	8.44745e-07	7.68342e-07	2.19734e-06	8.33943e-07	3.13753e-06	1.33146e-06	1.5567e-08	1.30781e-07	3.38523e-09	5.06402e-09	7.1886e-07	4.22252e-07	9.62171e-10	2.55082e-10	1.31881e-06	2.60301e-09	2.53202e-08	2.85795e-08	4.47764e-07
7.04644	9.59816e-09	1.98158e-10	9.35922e-08	1.71241e-08	4.52995e-09	8.69998e-10	1.40463e-09	4.88768e-08	2.47483e-09	1.39031e-09	1.01191e-07	2.0231e-06	6.7829e-05	4.08821e-06	2.14012e-06	1.1789e-10	2.46834e-05	6.96717e-06	3.74836e-06	1.73147e-05	7.94511e-08	1.44561e-09	9.9398e-07	4.78227e-06	2.02982e-06	4.90366e-07	4.36624e-06	5.42202e-06	8.81381e-10	7.6392e-06	8.93309e-07	8.1259e-07	2.31319e-06	8.8108e-07	3.30575e-06	1.40455e-06	1.68361e-08	1.3945e-07	3.66516e-09	5.48126e-09	7.61084e-07	4.48893e-07	1.0436e-09	2.77429e-10	1.39366e-06	2.80904e-09	2.71304e-08	3.05809e-08	4.76911e-07
7.07624	1.03416e-08	2.16896e-10	1.00004e-07	1.84179e-08	4.88634e-09	9.39804e-10	1.52412e-09	5.23159e-08	2.68197e-09	1.50871e-09	1.08218e-07	2.13866e-06	7.08323e-05	4.32094e-06	2.27392e-06	1.29205e-10	2.57267e-05	7.31999e-06	3.96378e-06	1.81514e-05	8.5154e-08	1.57662e-09	1.05264e-06	5.04418e-06	2.1472e-06	5.21137e-07	4.59754e-06	5.72139e-06	9.59423e-10	8.02397e-06	9.44538e-07	8.59263e-07	2.43486e-06	9.30762e-07	3.48252e-06	1.48147e-06	1.8205e-08	1.48673e-07	3.96751e-09	5.93179e-09	8.05689e-07	4.77145e-07	1.13174e-09	3.01683e-10	1.47255e-06	3.03096e-09	2.90661e-08	3.27175e-08	5.07868e-07
7.10605	1.11408e-08	2.3736e-10	1.06843e-07	1.98063e-08	5.26993e-09	1.01505e-09	1.65354e-09	5.59878e-08	2.9059e-09	1.63688e-09	1.15715e-07	2.26046e-06	7.39571e-05	4.56617e-06	2.41562e-06	1.41576e-10	2.68108e-05	7.68952e-06	4.19084e-06	1.90257e-05	9.12487e-08	1.71913e-09	1.11458e-06	5.31958e-06	2.27096e-06	5.53756e-07	4.84032e-06	6.03624e-06	1.04418e-09	8.42694e-06	9.9857e-07	9.08488e-07	2.56261e-06	9.8312e-07	3.66826e-06	1.5624e-06	1.96813e-08	1.58483e-07	4.294e-09	6.41817e-09	8.52802e-07	5.07102e-07	1.22712e-09	3.28002e-10	1.55569e-06	3.26995e-09	3.11357e-08	3.49983e-08	5.40741e-07
7.13585	1.19996e-08	2.59705e-10	1.14137e-07	2.1296e-08	5.68271e-09	1.09616e-09	1.7937e-09	5.99076e-08	3.14793e-09	1.77561e-09	1.23711e-07	2.38882e-06	7.72078e-05	4.82453e-06	2.56566e-06	1.55099e-10	2.79372e-05	8.07649e-06	4.43014e-06	1.99391e-05	9.77609e-08	1.87413e-09	1.17996e-06	5.60912e-06	2.40145e-06	5.88327e-07	5.09514e-06	6.36728e-06	1.13623e-09	8.84891e-06	1.05555e-06	9.60396e-07	2.69673e-06	1.03829e-06	3.86339e-06	1.64755e-06	2.12732e-08	1.68917e-07	4.6465e-09	6.94315e-09	9.02558e-07	5.38861e-07	1.33032e-09	3.56556e-10	1.6433e-06	3.52728e-09	3.33483e-08	3.74325e-08	5.75644e-07
7.16565	1.29224e-08	2.84098e-10	1.21914e-07	2.28941e-08	6.12685e-09	1.18356e-09	1.94547e-09	6.40914e-08	3.40948e-09	1.92573e-09	1.32238e-07	2.52407e-06	8.0589e-05	5.09666e-06	2.7245e-06	1.69877e-10	2.91073e-05	8.48166e-06	4.68228e-06	2.08931e-05	1.04718e-07	2.04265e-09	1.24897e-06	5.91348e-06	2.53899e-06	6.24962e-07	5.36253e-06	6.71529e-06	1.23615e-09	9.2907e-06	1.11563e-06	1.01513e-06	2.83753e-06	1.09641e-06	4.06836e-06	1.73712e-06	2.29893e-08	1.80012e-07	5.027e-09	7.5097e-09	9.55099e-07	5.72527e-07	1.44197e-09	3.87531e-10	1.73559e-06	3.80434e-09	3.57133e-08	4.00301e-08	6.12693e-07
7.19546	1.39137e-08	3.10722e-10	1.30207e-07	2.46082e-08	6.60465e-09	1.27773e-09	2.10979e-09	6.85561e-08	3.69205e-09	2.08815e-09	1.4133e-07	2.66654e-06	8.41052e-05	5.38325e-06	2.89262e-06	1.86023e-10	3.03228e-05	8.90581e-06	4.9479e-06	2.18895e-05	1.12148e-07	2.22586e-09	1.32179e-06	6.23337e-06	2.68395e-06	6.63778e-07	5.64307e-06	7.08108e-06	1.34463e-09	9.75318e-06	1.17897e-06	1.07282e-06	2.98532e-06	1.15764e-06	4.28364e-06	1.83134e-06	2.48388e-08	1.9181e-07	5.43766e-09	8.12097e-09	1.01057e-06	6.08208e-07	1.56274e-09	4.21125e-10	1.83281e-06	4.10258e-09	3.82408e-08	4.28016e-08	6.52014e-07
7.22526	1.49785e-08	3.39776e-10	1.39047e-07	2.64463e-08	7.11856e-09	1.37918e-09	2.28766e-09	7.33199e-08	3.99728e-09	2.26385e-09	1.51024e-07	2.81661e-06	8.77613e-05	5.68503e-06	3.07053e-06	2.03659e-10	3.15852e-05	9.34977e-06	5.22768e-06	2.293e-05	1.20083e-07	2.42497e-09	1.39863e-06	6.56951e-06	2.8367e-06	7.04899e-07	5.93736e-06	7.46547e-06	1.46235e-09	1.02372e-05	1.24574e-06	1.13364e-06	3.14042e-06	1.22214e-06	4.50971e-06	1.93042e-06	2.68319e-08	2.04351e-07	5.88077e-09	8.78039e-09	1.06914e-06	6.46018e-07	1.69335e-09	4.57554e-10	1.9352e-06	4.42358e-09	4.09418e-08	4.57583e-08	6.9374e-07
7.25506	1.6122e-08	3.71474e-10	1.48471e-07	2.84173e-08	7.67123e-09	1.48845e-09	2.48019e-09	7.84018e-08	4.32693e-09	2.45386e-09	1.61356e-07	2.97466e-06	9.15622e-05	6.00273e-06	3.25874e-06	2.22921e-10	3.28962e-05	9.81438e-06	5.52231e-06	2.40163e-05	1.28554e-07	2.64133e-09	1.47969e-06	6.92268e-06	2.99762e-06	7.48455e-07	6.24602e-06	7.86933e-06	1.59008e-09	1.07438e-05	1.31611e-06	1.19774e-06	3.30317e-06	1.29006e-06	4.74707e-06	2.03462e-06	2.89791e-08	2.17682e-07	6.35881e-09	9.4916e-09	1.13095e-06	6.8608e-07	1.83457e-09	4.97052e-10	2.04302e-06	4.76902e-09	4.38277e-08	4.89119e-08	7.38009e-07
7.28487	1.73498e-08	4.06051e-10	1.58515e-07	3.05302e-08	8.26548e-09	1.60613e-09	2.68854e-09	8.38224e-08	4.68288e-09	2.65932e-09	1.72368e-07	3.14107e-06	9.5513e-05	6.33715e-06	3.45784e-06	2.43951e-10	3.42575e-05	1.03005e-05	5.83253e-06	2.51503e-05	1.37596e-07	2.87637e-09	1.56518e-06	7.29368e-06	3.16712e-06	7.94583e-07	6.56971e-06	8.29358e-06	1.72866e-09	1.12739e-05	1.39026e-06	1.26528e-06	3.47394e-06	1.36158e-06	4.99627e-06	2.14417e-06	3.1292e-08	2.3185e-07	6.87444e-09	1.02585e-08	1.1962e-06	7.2852e-07	1.98725e-09	5.39868e-10	2.15656e-06	5.14072e-09	4.69107e-08	5.22751e-08	7.84968e-07
7.31467	1.86679e-08	4.4376e-10	1.69218e-07	3.27949e-08	8.90434e-09	1.73285e-09	2.91399e-09	8.9603e-08	5.06714e-09	2.88145e-09	1.84101e-07	3.31626e-06	9.96188e-05	6.6891e-06	3.66839e-06	2.66908e-10	3.56707e-05	1.08091e-05	6.1591e-06	2.63338e-05	1.47247e-07	3.13165e-09	1.65534e-06	7.68333e-06	3.34563e-06	8.43428e-07	6.90909e-06	8.73916e-06	1.87898e-09	1.18284e-05	1.4684e-06	1.33644e-06	3.6531e-06	1.43688e-06	5.25786e-06	2.25933e-06	3.37828e-08	2.46905e-07	7.43051e-09	1.10854e-08	1.26505e-06	7.73473e-07	2.1523e-09	5.86274e-10	2.27608e-06	5.54061e-09	5.02038e-08	5.58614e-08	8.34771e-07
7.34448	2.00826e-08	4.84877e-10	1.80623e-07	3.5222e-08	9.59104e-09	1.86927e-09	3.15789e-09	9.57667e-08	5.4819e-09	3.12153e-09	1.96603e-07	3.50067e-06	0.000103885	7.05943e-06	3.89102e-06	2.91963e-10	3.71378e-05	1.13412e-05	6.50281e-06	2.75689e-05	1.57543e-07	3.40885e-09	1.75039e-06	8.0925e-06	3.53359e-06	8.95141e-07	7.26488e-06	9.20706e-06	2.04199e-09	1.24085e-05	1.55072e-06	1.41141e-06	3.84102e-06	1.51616e-06	5.5324e-06	2.38039e-06	3.64647e-08	2.629e-07	8.03007e-09	1.19767e-08	1.33769e-06	8.2108e-07	2.33067e-09	6.36562e-10	2.40189e-06	5.97077e-09	5.37208e-08	5.96848e-08	8.87582e-07
7.37428	2.16008e-08	5.29701e-10	1.92775e-07	3.78226e-08	1.0329e-08	2.01611e-09	3.42173e-09	1.02338e-07	5.92948e-09	3.38099e-09	2.09919e-07	3.69474e-06	0.000108317	7.44905e-06	4.12636e-06	3.19302e-10	3.86605e-05	1.18976e-05	6.86451e-06	2.88575e-05	1.68528e-07	3.7098e-09	1.8506e-06	8.52211e-06	3.73147e-06	9.49882e-07	7.63779e-06	9.69829e-06	2.21874e-09	1.30152e-05	1.63742e-06	1.49038e-06	4.03813e-06	1.5996e-06	5.82051e-06	2.50762e-06	3.93517e-08	2.79892e-07	8.67641e-09	1.29372e-08	1.41433e-06	8.7149e-07	2.52342e-09	6.91048e-10	2.53429e-06	6.43341e-09	5.74764e-08	6.37605e-08	9.43571e-07
7.40408	2.32297e-08	5.78556e-10	2.05719e-07	4.06088e-08	1.1122e-08	2.17416e-09	3.70708e-09	1.09342e-07	6.41239e-09	3.66132e-09	2.24102e-07	3.89896e-06	0.000112921	7.85887e-06	4.3751e-06	3.49125e-10	4.02409e-05	1.24794e-05	7.24506e-06	3.02018e-05	1.80243e-07	4.03645e-09	1.95622e-06	8.97309e-06	3.93975e-06	1.00782e-06	8.0286e-06	1.02139e-05	2.41034e-09	1.36496e-05	1.72875e-06	1.57354e-06	4.24483e-06	1.68742e-06	6.12281e-06	2.64132e-06	4.24588e-08	2.9794e-07	9.37304e-09	1.39723e-08	1.49518e-06	9.24861e-07	2.73168e-09	7.50073e-10	2.67363e-06	6.93092e-09	6.14864e-08	6.81044e-08	1.00292e-06
7.43389	2.49771e-08	6.31794e-10	2.19506e-07	4.35931e-08	1.1974e-08	2.34423e-09	4.01566e-09	1.16806e-07	6.93331e-09	3.96415e-09	2.39205e-07	4.11381e-06	0.000117703	8.28988e-06	4.63794e-06	3.81652e-10	4.18807e-05	1.30878e-05	7.64537e-06	3.1604e-05	1.92736e-07	4.39091e-09	2.06752e-06	9.44643e-06	4.15894e-06	1.06913e-06	8.43809e-06	1.07551e-05	2.61802e-09	1.43129e-05	1.82491e-06	1.66112e-06	4.46157e-06	1.77984e-06	6.43997e-06	2.7818e-06	4.58022e-08	3.17107e-07	1.01237e-08	1.50873e-08	1.58044e-06	9.81356e-07	2.95664e-09	8.14004e-10	2.82023e-06	7.46585e-09	6.57671e-08	7.27334e-08	1.06582e-06
7.46369	2.68514e-08	6.89798e-10	2.3419e-07	4.67892e-08	1.28891e-08	2.5272e-09	4.3493e-09	1.24759e-07	7.49514e-09	4.29122e-09	2.55285e-07	4.33981e-06	0.000122668	8.7431e-06	4.91562e-06	4.1712e-10	4.35822e-05	1.37237e-05	8.06639e-06	3.30662e-05	2.06056e-07	4.77548e-09	2.18479e-06	9.94315e-06	4.38957e-06	1.13401e-06	8.86709e-06	1.13229e-05	2.84307e-09	1.50064e-05	1.92617e-06	1.75332e-06	4.68882e-06	1.87708e-06	6.77265e-06	2.92939e-06	4.93991e-08	3.37459e-07	1.09325e-08	1.62884e-08	1.67037e-06	1.04115e-06	3.19961e-09	8.83236e-10	2.97445e-06	8.04092e-09	7.03364e-08	7.76657e-08	1.13247e-06
7.49349	2.88612e-08	7.52979e-10	2.49826e-07	5.02115e-08	1.3872e-08	2.72404e-09	4.70998e-09	1.33233e-07	8.10095e-09	4.6444e-09	2.72403e-07	4.5775e-06	0.000127823	9.21958e-06	5.20894e-06	4.55786e-10	4.53473e-05	1.43884e-05	8.50911e-06	3.45909e-05	2.20253e-07	5.19261e-09	2.30833e-06	1.04643e-05	4.63219e-06	1.20264e-06	9.31645e-06	1.19186e-05	3.0869e-09	1.57312e-05	2.03277e-06	1.85039e-06	4.92704e-06	1.97937e-06	7.12158e-06	3.08443e-06	5.32679e-08	3.59066e-07	1.18038e-08	1.75817e-08	1.76518e-06	1.10443e-06	3.462e-09	9.58197e-10	3.13668e-06	8.65907e-09	7.52129e-08	8.292e-08	1.20308e-06
7.5233	3.10162e-08	8.21788e-10	2.66474e-07	5.38754e-08	1.49274e-08	2.93575e-09	5.09984e-09	1.42259e-07	8.75406e-09	5.0257e-09	2.90622e-07	4.82745e-06	0.000133174	9.72043e-06	5.51869e-06	4.9793e-10	4.71783e-05	1.50831e-05	8.97456e-06	3.61804e-05	2.35383e-07	5.64496e-09	2.43845e-06	1.1011e-05	4.88737e-06	1.27524e-06	9.78706e-06	1.25435e-05	3.35103e-09	1.64888e-05	2.14497e-06	1.95256e-06	5.17674e-06	2.08698e-06	7.4875e-06	3.24727e-06	5.74284e-08	3.82001e-07	1.27421e-08	1.89743e-08	1.86514e-06	1.17138e-06	3.74531e-09	1.03935e-09	3.30728e-06	9.3234e-09	8.04165e-08	8.85168e-08	1.27787e-06
7.5531	3.33263e-08	8.9671e-10	2.84197e-07	5.77973e-08	1.60605e-08	3.16342e-09	5.52117e-09	1.51871e-07	9.45805e-09	5.43729e-09	3.1001e-07	5.09023e-06	0.000138727	1.02468e-05	5.84574e-06	5.43853e-10	4.90772e-05	1.58089e-05	9.46382e-06	3.78372e-05	2.51505e-07	6.13541e-09	2.57547e-06	1.15845e-05	5.15573e-06	1.35202e-06	1.02798e-05	1.31987e-05	3.6371e-09	1.72803e-05	2.26306e-06	2.06009e-06	5.43844e-06	2.20016e-06	7.87118e-06	3.41829e-06	6.19016e-08	4.06344e-07	1.37525e-08	2.04734e-08	1.97052e-06	1.2422e-06	4.05114e-09	1.12718e-09	3.48668e-06	1.00373e-08	8.59684e-08	9.44773e-08	1.35708e-06
7.58291	3.58022e-08	9.78271e-10	3.03062e-07	6.19946e-08	1.72769e-08	3.40821e-09	5.97644e-09	1.62106e-07	1.02167e-08	5.88147e-09	3.3064e-07	5.36647e-06	0.00014449	1.07999e-05	6.19098e-06	5.93885e-10	5.10465e-05	1.65672e-05	9.97801e-06	3.95639e-05	2.68678e-07	6.66703e-09	2.71974e-06	1.21858e-05	5.43788e-06	1.43321e-06	1.07958e-05	1.38858e-05	3.94688e-09	1.81074e-05	2.38733e-06	2.17324e-06	5.71267e-06	2.31918e-06	8.27343e-06	3.59786e-06	6.671e-08	4.32176e-07	1.48403e-08	2.20869e-08	2.08158e-06	1.31712e-06	4.38125e-09	1.22224e-09	3.67531e-06	1.08043e-08	9.1891e-08	1.00824e-07	1.44095e-06
7.61271	3.84554e-08	1.06704e-09	3.2314e-07	6.6486e-08	1.85824e-08	3.67137e-09	6.4683e-09	1.73004e-07	1.10341e-08	6.36074e-09	3.52586e-07	5.65681e-06	0.000150469	1.1381e-05	6.55535e-06	6.48379e-10	5.30885e-05	1.73592e-05	1.05183e-05	4.13632e-05	2.86969e-07	7.24317e-09	2.87162e-06	1.28163e-05	5.7345e-06	1.51905e-06	1.13358e-05	1.4606e-05	4.28225e-09	1.89713e-05	2.51808e-06	2.29229e-06	6.00001e-06	2.44433e-06	8.6951e-06	3.78639e-06	7.18778e-08	4.59585e-07	1.60112e-08	2.38231e-08	2.19863e-06	1.39635e-06	4.7375e-09	1.3251e-09	3.87359e-06	1.16282e-08	9.82082e-08	1.07582e-07	1.52975e-06
7.64251	4.1298e-08	1.16364e-09	3.44506e-07	7.12912e-08	1.99833e-08	3.95423e-09	6.99962e-09	1.84603e-07	1.19147e-08	6.87778e-09	3.75929e-07	5.96192e-06	0.000156671	1.19915e-05	6.93983e-06	7.07722e-10	5.52055e-05	1.81864e-05	1.10859e-05	4.32377e-05	3.06447e-07	7.86741e-09	3.03147e-06	1.34773e-05	6.04624e-06	1.60979e-06	1.19011e-05	1.53609e-05	4.64527e-09	1.98736e-05	2.65562e-06	2.41753e-06	6.30105e-06	2.57591e-06	9.13705e-06	3.98431e-06	7.74306e-08	4.88662e-07	1.72713e-08	2.5691e-08	2.32196e-06	1.48012e-06	5.1219e-09	1.43637e-09	4.08201e-06	1.25132e-08	1.04945e-07	1.14775e-07	1.62373e-06
7.67232	4.43432e-08	1.26874e-09	3.67239e-07	7.64313e-08	2.14864e-08	4.25822e-09	7.57345e-09	1.96949e-07	1.28631e-08	7.43544e-09	4.00754e-07	6.28249e-06	0.000163104	1.26325e-05	7.34545e-06	7.72331e-10	5.74002e-05	1.90502e-05	1.16821e-05	4.51903e-05	3.27183e-07	8.54361e-09	3.19968e-06	1.417e-05	6.37385e-06	1.70571e-06	1.24925e-05	1.6152e-05	5.03815e-09	2.08159e-05	2.8003e-06	2.54927e-06	6.61639e-06	2.71423e-06	9.6002e-06	4.19205e-06	8.33959e-08	5.19504e-07	1.86271e-08	2.77002e-08	2.45189e-06	1.56869e-06	5.5366e-09	1.55673e-09	4.30105e-06	1.34636e-08	1.12129e-07	1.22431e-07	1.7232e-06
7.70212	4.76045e-08	1.38306e-09	3.91424e-07	8.19286e-08	2.30988e-08	4.58486e-09	8.19312e-09	2.10086e-07	1.38843e-08	8.03681e-09	4.2715e-07	6.61926e-06	0.000169775	1.33057e-05	7.77329e-06	8.42656e-10	5.96749e-05	1.99521e-05	1.23083e-05	4.7224e-05	3.49255e-07	9.27595e-09	3.37668e-06	1.4896e-05	6.71804e-06	1.80707e-06	1.31114e-05	1.69808e-05	5.46326e-09	2.17999e-05	2.95246e-06	2.68782e-06	6.94668e-06	2.85961e-06	1.00855e-05	4.41008e-06	8.98031e-08	5.52213e-07	2.00857e-08	2.98611e-08	2.58877e-06	1.66232e-06	5.98393e-09	1.6869e-09	4.53121e-06	1.44841e-08	1.19788e-07	1.30579e-07	1.82844e-06
7.73192	5.10969e-08	1.50738e-09	4.1715e-07	8.78069e-08	2.48282e-08	4.93579e-09	8.86217e-09	2.24063e-07	1.49838e-08	8.68519e-09	4.55213e-07	6.97298e-06	0.000176691	1.40125e-05	8.22447e-06	9.19188e-10	6.20324e-05	2.08935e-05	1.29657e-05	4.93418e-05	3.72744e-07	1.00689e-08	3.56287e-06	1.56567e-05	7.07961e-06	1.91417e-06	1.37588e-05	1.7849e-05	5.92317e-09	2.28271e-05	3.11246e-06	2.83352e-06	7.29257e-06	3.0124e-06	1.05939e-05	4.63887e-06	9.66836e-08	5.86897e-07	2.16546e-08	3.21845e-08	2.73294e-06	1.76127e-06	6.46636e-09	1.82765e-09	4.77303e-06	1.55797e-08	1.27952e-07	1.39248e-07	1.93978e-06
7.76173	5.48361e-08	1.64255e-09	4.4451e-07	9.40917e-08	2.66827e-08	5.31275e-09	9.58441e-09	2.38931e-07	1.61674e-08	9.38411e-09	4.85043e-07	7.34444e-06	0.000183861	1.47544e-05	8.70017e-06	1.00246e-09	6.44754e-05	2.18761e-05	1.36559e-05	5.15467e-05	3.97737e-07	1.09273e-08	3.7587e-06	1.64536e-05	7.45936e-06	2.02733e-06	1.44359e-05	1.87584e-05	6.42061e-09	2.38993e-05	3.28068e-06	2.9867e-06	7.65477e-06	3.17295e-06	1.11265e-05	4.87892e-06	1.04071e-07	6.23669e-07	2.33417e-08	3.46823e-08	2.88476e-06	1.86583e-06	6.98657e-09	1.97982e-09	5.02706e-06	1.67558e-08	1.36654e-07	1.4847e-07	2.05755e-06
7.79153	5.88386e-08	1.7895e-09	4.73605e-07	1.0081e-07	2.86712e-08	5.7176e-09	1.0364e-08	2.54745e-07	1.7441e-08	1.01374e-08	5.16746e-07	7.73448e-06	0.000191293	1.55331e-05	9.20162e-06	1.09303e-09	6.70067e-05	2.29016e-05	1.43803e-05	5.3842e-05	4.24323e-07	1.18563e-08	3.96464e-06	1.72883e-05	7.85813e-06	2.14685e-06	1.5144e-05	1.97105e-05	6.95857e-09	2.50184e-05	3.45753e-06	3.14775e-06	8.034e-06	3.34164e-06	1.16844e-05	5.13076e-06	1.12e-07	6.62649e-07	2.51557e-08	3.73671e-08	3.04463e-06	1.97631e-06	7.54743e-09	2.14432e-09	5.29388e-06	1.8018e-08	1.45928e-07	1.58281e-07	2.1821e-06
7.82134	6.31223e-08	1.94921e-09	5.04541e-07	1.0799e-07	3.08028e-08	6.15233e-09	1.12052e-08	2.71561e-07	1.88115e-08	1.0949e-08	5.50434e-07	8.14395e-06	0.000198994	1.63501e-05	9.7301e-06	1.19153e-09	6.9629e-05	2.39715e-05	1.51405e-05	5.6231e-05	4.52599e-07	1.28616e-08	4.18117e-06	1.81624e-05	8.27679e-06	2.2731e-06	1.58843e-05	2.07074e-05	7.54022e-09	2.61862e-05	3.64341e-06	3.31703e-06	8.43099e-06	3.51886e-06	1.22686e-05	5.39492e-06	1.2051e-07	7.03964e-07	2.71057e-08	4.02521e-08	3.21295e-06	2.09303e-06	8.15202e-09	2.32209e-09	5.57409e-06	1.93726e-08	1.55809e-07	1.68714e-07	2.31378e-06
7.85114	6.77062e-08	2.12275e-09	5.37429e-07	1.15662e-07	3.30876e-08	6.61909e-09	1.21129e-08	2.8944e-07	2.02858e-08	1.18235e-08	5.86225e-07	8.57375e-06	0.000206973	1.72074e-05	1.0287e-05	1.29864e-09	7.23455e-05	2.50878e-05	1.59382e-05	5.87171e-05	4.82666e-07	1.39491e-08	4.4088e-06	1.90776e-05	8.71627e-06	2.40641e-06	1.66583e-05	2.17508e-05	8.169e-09	2.74046e-05	3.83876e-06	3.49495e-06	8.84654e-06	3.705e-06	1.28803e-05	5.67198e-06	1.29641e-07	7.47747e-07	2.92015e-08	4.33519e-08	3.39012e-06	2.2163e-06	8.80363e-09	2.5142e-09	5.86832e-06	2.08259e-08	1.66335e-07	1.79808e-07	2.453e-06
7.88094	7.26103e-08	2.31129e-09	5.72386e-07	1.2386e-07	3.55361e-08	7.12013e-09	1.30921e-08	3.08447e-07	2.18715e-08	1.27653e-08	6.24245e-07	9.02482e-06	0.00021524	1.81066e-05	1.08736e-05	1.41506e-09	7.5159e-05	2.62521e-05	1.67749e-05	6.13039e-05	5.14632e-07	1.51254e-08	4.64805e-06	2.00357e-05	9.17751e-06	2.54717e-06	1.74674e-05	2.28428e-05	8.84861e-09	2.86757e-05	4.04403e-06	3.68191e-06	9.28146e-06	3.9005e-06	1.35208e-05	5.96253e-06	1.39437e-07	7.94136e-07	3.14536e-08	4.66817e-08	3.57661e-06	2.34649e-06	9.50581e-09	2.72176e-09	6.17724e-06	2.23849e-08	1.77548e-07	1.91604e-07	2.60014e-06
7.91075	7.78561e-08	2.51608e-09	6.09539e-07	1.32616e-07	3.81596e-08	7.6579e-09	1.41483e-08	3.28648e-07	2.35767e-08	1.37796e-08	6.64625e-07	9.49814e-06	0.000223802	1.90498e-05	1.14915e-05	1.54159e-09	7.80728e-05	2.74665e-05	1.76525e-05	6.39949e-05	5.48608e-07	1.63973e-08	4.89947e-06	2.10386e-05	9.6615e-06	2.69577e-06	1.83129e-05	2.39854e-05	9.58301e-09	3.00016e-05	4.25969e-06	3.87836e-06	9.7366e-06	4.10581e-06	1.41913e-05	6.26718e-06	1.49943e-07	8.43282e-07	3.38732e-08	5.0258e-08	3.77286e-06	2.48395e-06	1.02624e-08	2.94597e-09	6.50152e-06	2.40572e-08	1.8949e-07	2.04143e-07	2.75564e-06
7.94055	8.34665e-08	2.73847e-09	6.4902e-07	1.41968e-07	4.09701e-08	8.235e-09	1.52873e-08	3.50116e-07	2.54101e-08	1.48718e-08	7.07506e-07	9.99472e-06	0.000232669	2.00388e-05	1.21422e-05	1.67908e-09	8.109e-05	2.87328e-05	1.85728e-05	6.6794e-05	5.84715e-07	1.77724e-08	5.16364e-06	2.2088e-05	1.01693e-05	2.85262e-06	1.91963e-05	2.51808e-05	1.03765e-08	3.13843e-05	4.48624e-06	4.08474e-06	1.02128e-05	4.32137e-06	1.4893e-05	6.58658e-06	1.6121e-07	8.95338e-07	3.64723e-08	5.40982e-08	3.97936e-06	2.62907e-06	1.10774e-08	3.18813e-09	6.84189e-06	2.58506e-08	2.02207e-07	2.1747e-07	2.91995e-06
7.97036	8.94656e-08	2.97993e-09	6.90967e-07	1.51955e-07	4.39805e-08	8.8542e-09	1.65154e-08	3.72927e-07	2.73808e-08	1.60474e-08	7.53035e-07	1.05156e-05	0.00024185	2.10757e-05	1.28273e-05	1.82843e-09	8.42138e-05	3.00531e-05	1.95377e-05	6.9705e-05	6.23078e-07	1.92588e-08	5.44115e-06	2.31862e-05	1.07019e-05	3.01816e-06	2.01193e-05	2.64311e-05	1.12336e-08	3.28261e-05	4.7242e-06	4.30153e-06	1.07111e-05	4.54769e-06	1.56274e-05	6.9214e-06	1.73289e-07	9.50468e-07	3.92636e-08	5.82209e-08	4.19661e-06	2.78225e-06	1.19552e-08	3.44964e-09	7.19908e-06	2.77736e-08	2.15747e-07	2.31634e-07	3.09351e-06
8.00016	9.58793e-08	3.24204e-09	7.35528e-07	1.62617e-07	4.72045e-08	9.51846e-09	1.78395e-08	3.9716e-07	2.94988e-08	1.73128e-08	8.01367e-07	1.10619e-05	0.000251355	2.21627e-05	1.35485e-05	1.99064e-09	8.74478e-05	3.14294e-05	2.05492e-05	7.27318e-05	6.6383e-07	2.08649e-08	5.73263e-06	2.43349e-05	1.12605e-05	3.19285e-06	2.10834e-05	2.77386e-05	1.21593e-08	3.43293e-05	4.97409e-06	4.52923e-06	1.12322e-05	4.78526e-06	1.63959e-05	7.27233e-06	1.86237e-07	1.00885e-06	4.22609e-08	6.26462e-08	4.42514e-06	2.94392e-06	1.29006e-08	3.73199e-09	7.57389e-06	2.98353e-08	2.3016e-07	2.46683e-07	3.27684e-06
8.02996	1.02735e-07	3.52651e-09	7.8286e-07	1.73999e-07	5.06565e-08	1.02309e-08	1.92666e-08	4.22899e-07	3.17746e-08	1.86744e-08	8.52667e-07	1.16348e-05	0.000261194	2.3302e-05	1.43075e-05	2.16678e-09	9.07954e-05	3.28639e-05	2.16092e-05	7.58786e-05	7.0711e-07	2.26002e-08	6.03873e-06	2.55365e-05	1.18463e-05	3.37715e-06	2.20904e-05	2.91057e-05	1.31588e-08	3.58963e-05	5.23649e-06	4.76835e-06	1.17774e-05	5.03461e-06	1.71999e-05	7.6401e-06	2.00113e-07	1.07065e-06	4.54788e-08	6.73954e-08	4.66549e-06	3.11451e-06	1.39185e-08	4.0368e-09	7.96713e-06	3.20453e-08	2.45502e-07	2.62672e-07	3.47044e-06
8.05977	1.10062e-07	3.83517e-09	8.33127e-07	1.86146e-07	5.43522e-08	1.0995e-08	2.08046e-08	4.50234e-07	3.42196e-08	2.01393e-08	9.07108e-07	1.22355e-05	0.000271376	2.44958e-05	1.51061e-05	2.35799e-09	9.426e-05	3.43589e-05	2.272e-05	7.91495e-05	7.53067e-07	2.44746e-08	6.36013e-06	2.67931e-05	1.24603e-05	3.57157e-06	2.31419e-05	3.05348e-05	1.4238e-08	3.75296e-05	5.51198e-06	5.01943e-06	1.23475e-05	5.2963e-06	1.8041e-05	8.02547e-06	2.14982e-07	1.13608e-06	4.89327e-08	7.24911e-08	4.91826e-06	3.29449e-06	1.50143e-08	4.36581e-09	8.37963e-06	3.44139e-08	2.61828e-07	2.79655e-07	3.67485e-06
8.08957	1.1789e-07	4.17002e-09	8.86502e-07	1.99109e-07	5.8308e-08	1.18143e-08	2.24618e-08	4.79259e-07	3.68457e-08	2.17151e-08	9.64873e-07	1.28651e-05	0.000281912	2.57467e-05	1.59462e-05	2.56554e-09	9.78455e-05	3.59167e-05	2.38838e-05	8.2549e-05	8.01855e-07	2.64988e-08	6.69753e-06	2.8107e-05	1.3104e-05	3.77664e-06	2.42397e-05	3.20285e-05	1.54028e-08	3.92316e-05	5.80117e-06	5.28303e-06	1.29437e-05	5.57089e-06	1.89207e-05	8.42923e-06	2.3091e-07	1.20532e-06	5.26395e-08	7.79576e-08	5.18403e-06	3.48435e-06	1.61939e-08	4.72086e-09	8.81229e-06	3.6952e-08	2.79201e-07	2.97692e-07	3.89063e-06
8.11937	1.26254e-07	4.53321e-09	9.43171e-07	2.12939e-07	6.25415e-08	1.26927e-08	2.42471e-08	5.10073e-07	3.96658e-08	2.34098e-08	1.02616e-06	1.35251e-05	0.000292812	2.7057e-05	1.68299e-05	2.79075e-09	0.000101556	3.75396e-05	2.51028e-05	8.60815e-05	8.5364e-07	2.86843e-08	7.05166e-06	2.94806e-05	1.37786e-05	3.9929e-06	2.53857e-05	3.35894e-05	1.666e-08	4.10051e-05	6.10469e-06	5.55974e-06	1.3567e-05	5.85898e-06	1.98408e-05	8.85221e-06	2.47969e-07	1.2786e-06	5.66167e-08	8.38206e-08	5.46344e-06	3.6846e-06	1.74634e-08	5.10397e-09	9.26603e-06	3.96715e-08	2.97683e-07	3.16846e-07	4.11838e-06
8.14918	1.35188e-07	4.92705e-09	1.00333e-06	2.27691e-07	6.70714e-08	1.36342e-08	2.61701e-08	5.42781e-07	4.26937e-08	2.52319e-08	1.09116e-06	1.42167e-05	0.000304087	2.84294e-05	1.77591e-05	3.03507e-09	0.000105394	3.92302e-05	2.63796e-05	8.97515e-05	9.08593e-07	3.10435e-08	7.42331e-06	3.09163e-05	1.44854e-05	4.22094e-06	2.65819e-05	3.52201e-05	1.80164e-08	4.28527e-05	6.42322e-06	5.85018e-06	1.42187e-05	6.16122e-06	2.08029e-05	9.29525e-06	2.66238e-07	1.35614e-06	6.08833e-08	9.01079e-08	5.75714e-06	3.89577e-06	1.88293e-08	5.51727e-09	9.7418e-06	4.25848e-08	3.17344e-07	3.37182e-07	4.35873e-06
8.17898	1.44729e-07	5.35403e-09	1.06717e-06	2.43426e-07	7.19178e-08	1.46432e-08	2.82411e-08	5.77495e-07	4.5944e-08	2.71909e-08	1.1601e-06	1.49414e-05	0.000315748	2.98666e-05	1.87361e-05	3.30009e-09	0.000109365	4.09909e-05	2.77164e-05	9.35639e-05	9.66897e-07	3.35895e-08	7.81325e-06	3.24167e-05	1.52259e-05	4.46135e-06	2.78301e-05	3.69236e-05	1.94797e-08	4.47773e-05	6.75744e-06	6.15499e-06	1.48998e-05	6.47823e-06	2.18088e-05	9.75925e-06	2.85797e-07	1.43816e-06	6.54596e-08	9.68487e-08	6.06581e-06	4.11841e-06	2.0299e-08	5.96309e-09	1.02406e-05	4.57052e-08	3.38254e-07	3.58771e-07	4.61231e-06
8.20879	1.54916e-07	5.81686e-09	1.13493e-06	2.60204e-07	7.71017e-08	1.57244e-08	3.0471e-08	6.1433e-07	4.94325e-08	2.92964e-08	1.23319e-06	1.57005e-05	0.000327806	3.13714e-05	1.97631e-05	3.58747e-09	0.000113472	4.28245e-05	2.9116e-05	9.75235e-05	1.02874e-06	3.63367e-08	8.22233e-06	3.39845e-05	1.60015e-05	4.71478e-06	2.91326e-05	3.87028e-05	2.10581e-08	4.67818e-05	7.10807e-06	6.47483e-06	1.56117e-05	6.81072e-06	2.28603e-05	1.02451e-05	3.06734e-07	1.52492e-06	7.03672e-08	1.04074e-07	6.39018e-06	4.35312e-06	2.18799e-08	6.4439e-09	1.07635e-05	4.90468e-08	3.60489e-07	3.81685e-07	4.87981e-06
8.23859	1.65791e-07	6.31844e-09	1.20682e-06	2.78092e-07	8.26459e-08	1.68828e-08	3.28716e-08	6.5341e-07	5.31758e-08	3.15591e-08	1.31069e-06	1.64958e-05	0.000340273	3.29466e-05	2.08424e-05	3.89904e-09	0.00011772	4.47336e-05	3.05809e-05	0.000101635	1.09433e-06	3.93001e-08	8.6514e-06	3.56223e-05	1.68138e-05	4.98189e-06	3.04913e-05	4.05605e-05	2.27601e-08	4.88691e-05	7.47588e-06	6.8104e-06	1.63557e-05	7.15938e-06	2.39595e-05	1.07539e-05	3.29141e-07	1.61667e-06	7.56289e-08	1.11818e-07	6.73099e-06	4.60051e-06	2.35801e-08	6.96236e-09	1.13116e-05	5.26249e-08	3.8413e-07	4.06003e-07	5.16195e-06
8.26839	1.77399e-07	6.8619e-09	1.28308e-06	2.97161e-07	8.85742e-08	1.81237e-08	3.54555e-08	6.94866e-07	5.71918e-08	3.39901e-08	1.39285e-06	1.73286e-05	0.00035316	3.45954e-05	2.19765e-05	4.23677e-09	0.000122114	4.67211e-05	3.21141e-05	0.000105905	1.16388e-06	4.24963e-08	9.10138e-06	3.7333e-05	1.76643e-05	5.26336e-06	3.19085e-05	4.25001e-05	2.45953e-08	5.10424e-05	7.86164e-06	7.16244e-06	1.71331e-05	7.52497e-06	2.51082e-05	1.12865e-05	3.53116e-07	1.71369e-06	8.12694e-08	1.20116e-07	7.08902e-06	4.86121e-06	2.54085e-08	7.52132e-09	1.18859e-05	5.64555e-08	4.09262e-07	4.31807e-07	5.45947e-06
8.2982	1.89787e-07	7.45061e-09	1.36398e-06	3.17484e-07	9.49123e-08	1.94527e-08	3.82362e-08	7.38834e-07	6.14995e-08	3.66016e-08	1.47991e-06	1.82006e-05	0.000366479	3.63209e-05	2.3168e-05	4.60277e-09	0.000126656	4.87899e-05	3.37182e-05	0.000110336	1.23761e-06	4.59426e-08	9.57319e-06	3.91196e-05	1.85547e-05	5.55994e-06	3.33866e-05	4.45246e-05	2.65736e-08	5.3305e-05	8.26618e-06	7.53169e-06	1.79453e-05	7.90824e-06	2.63085e-05	1.1844e-05	3.78765e-07	1.81626e-06	8.73147e-08	1.29006e-07	7.46509e-06	5.13592e-06	2.73744e-08	8.12387e-09	1.24878e-05	6.05558e-08	4.35975e-07	4.59182e-07	5.77316e-06
8.328	2.03005e-07	8.08821e-09	1.44977e-06	3.39141e-07	1.01687e-07	2.08759e-08	4.12281e-08	7.8546e-07	6.61191e-08	3.94063e-08	1.57218e-06	1.91136e-05	0.000380242	3.81262e-05	2.44194e-05	4.99931e-09	0.000131353	5.0943e-05	3.53964e-05	0.000114936	1.31576e-06	4.96579e-08	1.00678e-05	4.0985e-05	1.94867e-05	5.87239e-06	3.49278e-05	4.66374e-05	2.87059e-08	5.566e-05	8.69033e-06	7.91895e-06	1.87937e-05	8.31001e-06	2.75627e-05	1.24274e-05	4.06199e-07	1.92468e-06	9.37927e-08	1.38527e-07	7.86005e-06	5.42532e-06	2.94876e-08	8.77328e-09	1.31183e-05	6.49441e-08	4.64364e-07	4.88222e-07	6.10383e-06
8.3578	2.17106e-07	8.77862e-09	1.54075e-06	3.62214e-07	1.08928e-07	2.23997e-08	4.44468e-08	8.34895e-07	7.10724e-08	4.2418e-08	1.66993e-06	2.00694e-05	0.000394463	4.00149e-05	2.57335e-05	5.42885e-09	0.000136208	5.31835e-05	3.71518e-05	0.00011971	1.39857e-06	5.36623e-08	1.05863e-05	4.29325e-05	2.0462e-05	6.2015e-06	3.65346e-05	4.8842e-05	3.10035e-08	5.81109e-05	9.13501e-06	8.32504e-06	1.96799e-05	8.73112e-06	2.88729e-05	1.3038e-05	4.35536e-07	2.03927e-06	1.00733e-07	1.48724e-07	8.27477e-06	5.73015e-06	3.17591e-08	9.47308e-09	1.37788e-05	6.96398e-08	4.94528e-07	5.19021e-07	6.45235e-06
8.38761	2.32146e-07	9.52604e-09	1.6372e-06	3.86792e-07	1.16665e-07	2.40309e-08	4.79087e-08	8.87301e-07	7.63823e-08	4.56513e-08	1.77349e-06	2.10696e-05	0.000409153	4.19904e-05	2.71132e-05	5.89405e-09	0.000141226	5.55145e-05	3.89875e-05	0.000124663	1.4863e-06	5.79773e-08	1.11296e-05	4.49652e-05	2.14825e-05	6.54812e-06	3.82096e-05	5.11419e-05	3.3479e-08	6.06613e-05	9.60112e-06	8.75083e-06	2.06055e-05	9.17244e-06	3.02415e-05	1.36769e-05	4.66902e-07	2.16036e-06	1.08168e-07	1.59642e-07	8.71019e-06	6.05119e-06	3.42001e-08	1.02271e-08	1.44706e-05	7.46637e-08	5.26574e-07	5.51682e-07	6.8196e-06
8.41741	2.48184e-07	1.0335e-08	1.73944e-06	4.12969e-07	1.24932e-07	2.57769e-08	5.16316e-08	9.42846e-07	8.20735e-08	4.91219e-08	1.88317e-06	2.21164e-05	0.000424325	4.40563e-05	2.85616e-05	6.39773e-09	0.000146413	5.79395e-05	4.09068e-05	0.000129802	1.57923e-06	6.2626e-08	1.16989e-05	4.70866e-05	2.25501e-05	6.91312e-06	3.99553e-05	5.35407e-05	3.61455e-08	6.33148e-05	1.00896e-05	9.19721e-06	2.15719e-05	9.63488e-06	3.16708e-05	1.43453e-05	5.00432e-07	2.28829e-06	1.1613e-07	1.71329e-07	9.16727e-06	6.38924e-06	3.68229e-08	1.10393e-08	1.51952e-05	8.00379e-08	5.60615e-07	5.86312e-07	7.20654e-06
8.44722	2.65285e-07	1.12105e-08	1.84781e-06	4.40844e-07	1.33762e-07	2.76453e-08	5.56344e-08	1.00171e-06	8.81721e-08	5.28464e-08	1.99932e-06	2.32116e-05	0.000439994	4.62164e-05	3.00816e-05	6.94298e-09	0.000151772	6.04618e-05	4.29133e-05	0.000135131	1.67765e-06	6.76332e-08	1.22953e-05	4.93001e-05	2.36667e-05	7.29741e-06	4.17745e-05	5.60424e-05	3.90174e-08	6.60751e-05	1.06015e-05	9.66512e-06	2.2581e-05	1.01194e-05	3.31634e-05	1.50445e-05	5.36267e-07	2.42344e-06	1.24655e-07	1.83837e-07	9.64702e-06	6.74514e-06	3.96406e-08	1.19142e-08	1.59538e-05	8.57858e-08	5.96768e-07	6.23023e-07	7.61414e-06
8.47702	2.83515e-07	1.21576e-08	1.96265e-06	4.70521e-07	1.43193e-07	2.96445e-08	5.99373e-08	1.06408e-06	9.47061e-08	5.68428e-08	2.1223e-06	2.43574e-05	0.000456172	4.84747e-05	3.16765e-05	7.53309e-09	0.000157311	6.30849e-05	4.50105e-05	0.000140659	1.78186e-06	7.30253e-08	1.29201e-05	5.16093e-05	2.48344e-05	7.70196e-06	4.36699e-05	5.86508e-05	4.21097e-08	6.89461e-05	1.11379e-05	1.01555e-05	2.36345e-05	1.0627e-05	3.47218e-05	1.57758e-05	5.74558e-07	2.56619e-06	1.33783e-07	1.97222e-07	1.01505e-05	7.11978e-06	4.26673e-08	1.28563e-08	1.67481e-05	9.19324e-08	6.35158e-07	6.61936e-07	8.04343e-06
8.50682	3.02945e-07	1.31821e-08	2.08432e-06	5.02112e-07	1.53263e-07	3.17833e-08	6.45621e-08	1.13016e-06	1.01705e-07	6.11298e-08	2.2525e-06	2.55558e-05	0.000472873	5.08352e-05	3.33498e-05	8.1716e-09	0.000163033	6.58126e-05	4.72021e-05	0.000146391	1.89218e-06	7.88307e-08	1.35744e-05	5.4018e-05	2.60554e-05	8.12777e-06	4.56444e-05	6.13699e-05	4.54389e-08	7.19319e-05	1.16998e-05	1.06694e-05	2.47342e-05	1.11587e-05	3.63488e-05	1.65406e-05	6.15466e-07	2.71693e-06	1.43552e-07	2.11542e-07	1.06788e-05	7.51407e-06	4.59178e-08	1.38708e-08	1.75796e-05	9.85043e-08	6.75917e-07	7.03176e-07	8.49548e-06
8.53663	3.23651e-07	1.42901e-08	2.21322e-06	5.35733e-07	1.64015e-07	3.4071e-08	6.95318e-08	1.20015e-06	1.09201e-07	6.5728e-08	2.39031e-06	2.68092e-05	0.000490111	5.33021e-05	3.51049e-05	8.86236e-09	0.000168944	6.86484e-05	4.94919e-05	0.000152333	2.00894e-06	8.50796e-08	1.42594e-05	5.65299e-05	2.73318e-05	8.57589e-06	4.7701e-05	6.4204e-05	4.90223e-08	7.50366e-05	1.22883e-05	1.12079e-05	2.58819e-05	1.17155e-05	3.8047e-05	1.73403e-05	6.59161e-07	2.87609e-06	1.54008e-07	2.26859e-07	1.1233e-05	7.92899e-06	4.94082e-08	1.49629e-08	1.84499e-05	1.0553e-07	7.19185e-07	7.46876e-07	8.97141e-06
8.56643	3.45712e-07	1.54881e-08	2.34974e-06	5.71511e-07	1.75493e-07	3.65176e-08	7.48712e-08	1.27428e-06	1.17227e-07	7.06588e-08	2.53616e-06	2.81197e-05	0.000507901	5.58799e-05	3.69454e-05	9.60945e-09	0.00017505	7.15964e-05	5.18838e-05	0.000158492	2.13249e-06	9.18046e-08	1.49767e-05	5.91492e-05	2.86658e-05	9.04742e-06	4.98428e-05	6.71573e-05	5.28787e-08	7.82644e-05	1.29047e-05	1.17721e-05	2.70796e-05	1.22987e-05	3.98194e-05	1.81764e-05	7.05824e-07	3.04412e-06	1.65195e-07	2.4324e-07	1.18143e-05	8.36554e-06	5.31555e-08	1.61384e-08	1.93608e-05	1.13039e-07	7.65109e-07	7.93174e-07	9.47241e-06
8.59624	3.69213e-07	1.67831e-08	2.49433e-06	6.09574e-07	1.87742e-07	3.91337e-08	8.06068e-08	1.35277e-06	1.25819e-07	7.59453e-08	2.69048e-06	2.94898e-05	0.000526257	5.85729e-05	3.88751e-05	1.04173e-08	0.000181356	7.46605e-05	5.43822e-05	0.000164876	2.2632e-06	9.90403e-08	1.57274e-05	6.18798e-05	3.006e-05	9.54351e-06	5.2073e-05	7.02343e-05	5.70282e-08	8.16196e-05	1.35502e-05	1.2363e-05	2.83294e-05	1.29093e-05	4.1669e-05	1.90505e-05	7.55648e-07	3.22148e-06	1.77162e-07	2.60755e-07	1.24241e-05	8.82476e-06	5.71781e-08	1.74035e-08	2.03139e-05	1.21064e-07	8.13844e-07	8.42218e-07	9.99968e-06
8.62604	3.94244e-07	1.81827e-08	2.64743e-06	6.50064e-07	2.00814e-07	4.19307e-08	8.67667e-08	1.43587e-06	1.35016e-07	8.16121e-08	2.85375e-06	3.09221e-05	0.000545195	6.13859e-05	4.0898e-05	1.12907e-08	0.000187869	7.78447e-05	5.6991e-05	0.000171491	2.40146e-06	1.06824e-07	1.65132e-05	6.4726e-05	3.15166e-05	1.00654e-05	5.43948e-05	7.34396e-05	6.1492e-08	8.5107e-05	1.4226e-05	1.2982e-05	2.96333e-05	1.35485e-05	4.35989e-05	1.9964e-05	8.08836e-07	3.40866e-06	1.89963e-07	2.7948e-07	1.30634e-05	9.30777e-06	6.14954e-08	1.87649e-08	2.13111e-05	1.29638e-07	8.65553e-07	8.94164e-07	1.05545e-05
8.65584	4.20898e-07	1.96951e-08	2.80951e-06	6.93126e-07	2.14761e-07	4.49205e-08	9.33811e-08	1.52383e-06	1.44857e-07	8.76853e-08	3.02645e-06	3.2419e-05	0.000564728	6.43238e-05	4.30181e-05	1.22346e-08	0.000194594	8.11535e-05	5.97149e-05	0.000178345	2.54768e-06	1.15195e-07	1.73354e-05	6.76922e-05	3.30383e-05	1.06142e-05	5.68117e-05	7.67779e-05	6.62932e-08	8.8731e-05	1.49334e-05	1.36302e-05	3.09935e-05	1.42178e-05	4.56123e-05	2.09188e-05	8.65604e-07	3.60617e-06	2.03651e-07	2.99493e-07	1.37338e-05	9.8157e-06	6.61283e-08	2.02294e-08	2.23542e-05	1.38799e-07	9.20411e-07	9.49174e-07	1.11383e-05
8.68565	4.49277e-07	2.1329e-08	2.98107e-06	7.38917e-07	2.29638e-07	4.81159e-08	1.00482e-07	1.61694e-06	1.55387e-07	9.41929e-08	3.20911e-06	3.39833e-05	0.000584874	6.73916e-05	4.52397e-05	1.32547e-08	0.000201537	8.45911e-05	6.25582e-05	0.000185445	2.70229e-06	1.24196e-07	1.81955e-05	7.07829e-05	3.46277e-05	1.11914e-05	5.93271e-05	8.02542e-05	7.14562e-08	9.24965e-05	1.56739e-05	1.4309e-05	3.24123e-05	1.49182e-05	4.77125e-05	2.19165e-05	9.26181e-07	3.81454e-06	2.18287e-07	3.20879e-07	1.44366e-05	1.03498e-05	7.10991e-08	2.18049e-08	2.34454e-05	1.48583e-07	9.78597e-07	1.00742e-06	1.17523e-05
8.71545	4.79486e-07	2.30937e-08	3.16265e-06	7.876e-07	2.45506e-07	5.15305e-08	1.08104e-07	1.71546e-06	1.66651e-07	1.01165e-07	3.40225e-06	3.56177e-05	0.000605647	7.05944e-05	4.75672e-05	1.43568e-08	0.000208704	8.8162e-05	6.55258e-05	0.000192798	2.86572e-06	1.33872e-07	1.90953e-05	7.40028e-05	3.62874e-05	1.17983e-05	6.19447e-05	8.38733e-05	7.70073e-08	9.64085e-05	1.64489e-05	1.50196e-05	3.38919e-05	1.56513e-05	4.99029e-05	2.29588e-05	9.90812e-07	4.03434e-06	2.33931e-07	3.43729e-07	1.51732e-05	1.09112e-05	7.64316e-08	2.34993e-08	2.45866e-05	1.59033e-07	1.04031e-06	1.06908e-06	1.23981e-05
8.74525	5.11638e-07	2.49994e-08	3.35479e-06	8.39349e-07	2.62427e-07	5.51787e-08	1.16284e-07	1.81971e-06	1.78698e-07	1.08632e-07	3.60646e-06	3.73251e-05	0.000627063	7.39378e-05	5.00052e-05	1.55472e-08	0.000216103	9.1871e-05	6.86225e-05	0.000200413	3.03845e-06	1.44272e-07	2.00364e-05	7.73567e-05	3.80204e-05	1.24363e-05	6.46681e-05	8.76406e-05	8.29746e-08	0.000100472	1.72598e-05	1.57636e-05	3.54349e-05	1.64184e-05	5.21872e-05	2.40478e-05	1.05975e-06	4.26615e-06	2.50652e-07	3.68137e-07	1.59452e-05	1.15013e-05	8.21511e-08	2.53213e-08	2.57799e-05	1.70191e-07	1.10574e-06	1.13436e-06	1.30772e-05
8.77506	5.45852e-07	2.70568e-08	3.55807e-06	8.94347e-07	2.80467e-07	5.90759e-08	1.25061e-07	1.92998e-06	1.9158e-07	1.16629e-07	3.82233e-06	3.91086e-05	0.000649139	7.74272e-05	5.25583e-05	1.68328e-08	0.00022374	9.57227e-05	7.18533e-05	0.000208298	3.22097e-06	1.55447e-07	2.10205e-05	8.08496e-05	3.98295e-05	1.31069e-05	6.75013e-05	9.15613e-05	8.93881e-08	0.000104693	1.81081e-05	1.65422e-05	3.70436e-05	1.72211e-05	5.4569e-05	2.51852e-05	1.13328e-06	4.5106e-06	2.6852e-07	3.94206e-07	1.67541e-05	1.21215e-05	8.82848e-08	2.72803e-08	2.70275e-05	1.82104e-07	1.17511e-06	1.20344e-06	1.37911e-05
8.80486	5.82254e-07	2.92776e-08	3.7731e-06	9.52789e-07	2.99699e-07	6.32384e-08	1.34477e-07	2.04663e-06	2.05352e-07	1.25191e-07	4.0505e-06	4.09711e-05	0.000671892	8.10686e-05	5.52317e-05	1.82208e-08	0.000231621	9.97222e-05	7.52234e-05	0.00021646	3.41381e-06	1.67453e-07	2.20493e-05	8.44867e-05	4.17177e-05	1.38117e-05	7.04481e-05	9.56411e-05	9.62797e-08	0.000109075	1.89956e-05	1.73572e-05	3.87208e-05	1.80608e-05	5.70521e-05	2.63732e-05	1.21168e-06	4.76833e-06	2.87609e-07	4.22041e-07	1.76015e-05	1.27732e-05	9.48616e-08	2.93862e-08	2.83319e-05	1.9482e-07	1.24865e-06	1.27654e-06	1.45416e-05
8.83467	6.20975e-07	3.16743e-08	4.00053e-06	1.01488e-06	3.20197e-07	6.76836e-08	1.44576e-07	2.16999e-06	2.20073e-07	1.34357e-07	4.29161e-06	4.2916e-05	0.000695339	8.48677e-05	5.80303e-05	1.9719e-08	0.000239754	0.000103874	7.87383e-05	0.000224908	3.61749e-06	1.80348e-07	2.31248e-05	8.82731e-05	4.36881e-05	1.45524e-05	7.35128e-05	9.98854e-05	1.03684e-07	0.000113626	1.99239e-05	1.82099e-05	4.0469e-05	1.89392e-05	5.96405e-05	2.76137e-05	1.29527e-06	5.04001e-06	3.08e-07	4.51758e-07	1.84893e-05	1.34578e-05	1.01912e-07	3.16496e-08	2.96953e-05	2.08391e-07	1.32658e-06	1.35388e-06	1.53303e-05
8.86447	6.62158e-07	3.42603e-08	4.24104e-06	1.08083e-06	3.4204e-07	7.24299e-08	1.55406e-07	2.30042e-06	2.35805e-07	1.44167e-07	4.54637e-06	4.49466e-05	0.000719495	8.88309e-05	6.09594e-05	2.13359e-08	0.000248145	0.000108185	8.24035e-05	0.000233651	3.83259e-06	1.94196e-07	2.42489e-05	9.22144e-05	4.57441e-05	1.53305e-05	7.66994e-05	0.0001043	1.11637e-07	0.00011835	2.08947e-05	1.91021e-05	4.22911e-05	1.98579e-05	6.23383e-05	2.8909e-05	1.38436e-06	5.32636e-06	3.29776e-07	4.83477e-07	1.94191e-05	1.41769e-05	1.0947e-07	3.40819e-08	3.11202e-05	2.22873e-07	1.40917e-06	1.4357e-06	1.61591e-05
8.89427	7.0595e-07	3.70498e-08	4.49532e-06	1.15088e-06	3.65313e-07	7.74969e-08	1.67017e-07	2.43832e-06	2.52614e-07	1.54664e-07	4.8155e-06	4.70663e-05	0.00074438	9.29645e-05	6.40247e-05	2.30806e-08	0.000256801	0.000112659	8.62246e-05	0.000242698	4.0597e-06	2.09064e-07	2.54236e-05	9.63162e-05	4.78888e-05	1.6148e-05	8.00124e-05	0.000108892	1.20178e-07	0.000123253	2.19098e-05	2.00355e-05	4.41899e-05	2.08187e-05	6.51498e-05	3.02612e-05	1.4793e-06	5.62812e-06	3.53029e-07	5.17327e-07	2.03928e-05	1.49322e-05	1.17569e-07	3.66953e-08	3.26092e-05	2.38323e-07	1.49667e-06	1.52224e-06	1.70299e-05
8.92408	7.52509e-07	4.00583e-08	4.76413e-06	1.22526e-06	3.90105e-07	8.29053e-08	1.79464e-07	2.58409e-06	2.70571e-07	1.65895e-07	5.09977e-06	4.92787e-05	0.000770011	9.72752e-05	6.72317e-05	2.49626e-08	0.000265731	0.000117301	9.02078e-05	0.000252057	4.29945e-06	2.25023e-07	2.66509e-05	0.000100584	5.01258e-05	1.70065e-05	8.34562e-05	0.000113666	1.2935e-07	0.000128342	2.2971e-05	2.10118e-05	4.61685e-05	2.18234e-05	6.80793e-05	3.16727e-05	1.58046e-06	5.94606e-06	3.77853e-07	5.53445e-07	2.14123e-05	1.57252e-05	1.26249e-07	3.95029e-08	3.41651e-05	2.54805e-07	1.58936e-06	1.61376e-06	1.79445e-05
8.95388	8.02e-07	4.33023e-08	5.04825e-06	1.30422e-06	4.1651e-07	8.86773e-08	1.92804e-07	2.73815e-06	2.89751e-07	1.77909e-07	5.39998e-06	5.15875e-05	0.000796406	0.00010177	7.05864e-05	2.69923e-08	0.000274942	0.000122119	9.4359e-05	0.000261738	4.55248e-06	2.4215e-07	2.79331e-05	0.000105025	5.24585e-05	1.79082e-05	8.70355e-05	0.000118629	1.39196e-07	0.000133623	2.40804e-05	2.20328e-05	4.82299e-05	2.28739e-05	7.11314e-05	3.31458e-05	1.68823e-06	6.281e-06	4.04349e-07	5.91973e-07	2.24796e-05	1.65579e-05	1.35547e-07	4.25185e-08	3.57905e-05	2.72384e-07	1.68754e-06	1.71053e-06	1.89051e-05
8.98368	8.546e-07	4.67995e-08	5.3485e-06	1.38804e-06	4.4463e-07	9.48363e-08	2.07098e-07	2.90095e-06	3.10231e-07	1.90756e-07	5.71697e-06	5.39965e-05	0.000823583	0.000106455	7.4095e-05	2.9181e-08	0.000284442	0.000127117	9.86846e-05	0.000271751	4.81949e-06	2.60527e-07	2.92722e-05	0.000109644	5.48908e-05	1.8855e-05	9.07551e-05	0.000123787	1.49764e-07	0.000139103	2.52399e-05	2.31006e-05	5.03772e-05	2.39721e-05	7.43107e-05	3.46832e-05	1.80301e-06	6.63379e-06	4.32625e-07	6.33067e-07	2.35967e-05	1.7432e-05	1.45508e-07	4.5757e-08	3.74884e-05	2.9113e-07	1.7915e-06	1.81284e-06	1.99137e-05
9.01349	9.10493e-07	5.05689e-08	5.66575e-06	1.477e-06	4.7457e-07	1.01407e-07	2.22412e-07	3.07295e-06	3.32098e-07	2.04494e-07	6.05163e-06	5.65097e-05	0.000851561	0.000111339	7.77638e-05	3.15404e-08	0.000294238	0.000132302	0.000103191	0.000282104	5.10118e-06	2.8024e-07	3.06707e-05	0.000114447	5.74264e-05	1.98489e-05	9.46198e-05	0.000129148	1.61105e-07	0.000144787	2.64516e-05	2.4217e-05	5.26139e-05	2.512e-05	7.76222e-05	3.62873e-05	1.92524e-06	7.00532e-06	4.62794e-07	6.76887e-07	2.47659e-05	1.83493e-05	1.56176e-07	4.92343e-08	3.92617e-05	3.11117e-07	1.90159e-06	1.92099e-06	2.09727e-05
9.04329	9.69874e-07	5.46307e-08	6.0009e-06	1.57139e-06	5.06442e-07	1.08416e-07	2.38815e-07	3.25465e-06	3.55439e-07	2.1918e-07	6.40489e-06	5.91313e-05	0.000880359	0.000116429	8.15994e-05	3.40835e-08	0.000304339	0.00013768	0.000107885	0.000292808	5.3983e-06	3.01383e-07	3.2131e-05	0.000119442	6.00692e-05	2.08923e-05	9.86347e-05	0.000134718	1.73273e-07	0.000150683	2.77177e-05	2.53841e-05	5.49432e-05	2.63198e-05	8.10708e-05	3.79608e-05	2.05538e-06	7.39652e-06	4.94978e-07	7.23606e-07	2.59893e-05	1.9312e-05	1.67599e-07	5.29675e-08	4.11136e-05	3.32423e-07	2.01813e-06	2.03529e-06	2.20842e-05
9.0731	1.03295e-06	5.90068e-08	6.3549e-06	1.67154e-06	5.40365e-07	1.15892e-07	2.56381e-07	3.44658e-06	3.8035e-07	2.34877e-07	6.77771e-06	6.18655e-05	0.000909997	0.000121733	8.56086e-05	3.68238e-08	0.000314753	0.000143257	0.000112774	0.000303874	5.71164e-06	3.24053e-07	3.36554e-05	0.000124635	6.28233e-05	2.19874e-05	0.000102805	0.000140505	1.86327e-07	0.000156797	2.90404e-05	2.6604e-05	5.73688e-05	2.75737e-05	8.46618e-05	3.97065e-05	2.19391e-06	7.80836e-06	5.29304e-07	7.73406e-07	2.72693e-05	2.03221e-05	1.79831e-07	5.69747e-08	4.30473e-05	3.55133e-07	2.14148e-06	2.15608e-06	2.32508e-05
9.1029	1.09994e-06	6.37205e-08	6.72876e-06	1.77776e-06	5.76465e-07	1.23864e-07	2.7519e-07	3.64926e-06	4.06932e-07	2.51652e-07	7.17112e-06	6.47167e-05	0.000940493	0.000127258	8.97986e-05	3.97762e-08	0.000325489	0.00014904	0.000117865	0.00031531	6.04202e-06	3.48357e-07	3.52466e-05	0.000130034	6.56929e-05	2.31365e-05	0.000107136	0.000146515	2.00328e-07	0.000163138	3.04222e-05	2.78791e-05	5.98944e-05	2.88838e-05	8.84005e-05	4.15273e-05	2.34135e-06	8.24186e-06	5.65908e-07	8.2648e-07	2.86082e-05	2.13818e-05	1.92924e-07	6.12752e-08	4.50661e-05	3.79333e-07	2.27202e-06	2.28371e-06	2.44749e-05
9.1327	1.17108e-06	6.87966e-08	7.12351e-06	1.89042e-06	6.14875e-07	1.32363e-07	2.95325e-07	3.86327e-06	4.35289e-07	2.69575e-07	7.58619e-06	6.76895e-05	0.000971868	0.000133013	9.41765e-05	4.29561e-08	0.000336556	0.000155035	0.000123165	0.000327128	6.3903e-06	3.74407e-07	3.69072e-05	0.000135644	6.86824e-05	2.43422e-05	0.000111634	0.000152757	2.15341e-07	0.000169712	3.18653e-05	2.92115e-05	6.25235e-05	3.02527e-05	9.22924e-05	4.34261e-05	2.49824e-06	8.69809e-06	6.04934e-07	8.83032e-07	3.00087e-05	2.24932e-05	2.06938e-07	6.58898e-08	4.71736e-05	4.05119e-07	2.41016e-06	2.41854e-06	2.57591e-05
9.16251	1.2466e-06	7.4262e-08	7.54026e-06	2.00988e-06	6.55736e-07	1.41424e-07	3.16875e-07	4.0892e-06	4.65537e-07	2.8872e-07	8.02404e-06	7.07886e-05	0.00100414	0.000139007	9.87501e-05	4.63806e-08	0.000347962	0.000161251	0.000128682	0.000339339	6.75737e-06	4.02321e-07	3.86399e-05	0.000141474	7.17961e-05	2.5607e-05	0.000116303	0.000159237	2.31438e-07	0.000176527	3.33723e-05	3.06037e-05	6.52603e-05	3.16827e-05	9.63433e-05	4.54061e-05	2.66515e-06	9.17816e-06	6.46534e-07	9.43279e-07	3.14732e-05	2.36588e-05	2.21936e-07	7.08407e-08	4.93732e-05	4.32589e-07	2.5563e-06	2.56095e-06	2.71062e-05
9.19231	1.32676e-06	8.01453e-08	7.98016e-06	2.13653e-06	6.99196e-07	1.51081e-07	3.39936e-07	4.32769e-06	4.97793e-07	3.09168e-07	8.48585e-06	7.4019e-05	0.00103733	0.000145249	0.000103527	5.00675e-08	0.000359717	0.000167693	0.000134423	0.000351954	7.14418e-06	4.32229e-07	4.04477e-05	0.00014753	7.50387e-05	2.69337e-05	0.00012115	0.000165965	2.48692e-07	0.000183591	3.49459e-05	3.20581e-05	6.81087e-05	3.31764e-05	0.000100559	4.74703e-05	2.84269e-06	9.68323e-06	6.90869e-07	1.00745e-06	3.30045e-05	2.4881e-05	2.37983e-07	7.61513e-08	5.16688e-05	4.61848e-07	2.71088e-06	2.71136e-06	2.85189e-05
9.22212	1.41184e-06	8.6477e-08	8.44442e-06	2.27078e-06	7.45413e-07	1.61373e-07	3.64609e-07	4.57939e-06	5.32186e-07	3.31003e-07	8.97284e-06	7.73856e-05	0.00107147	0.000151748	0.000108516	5.40363e-08	0.00037183	0.00017437	0.000140397	0.000364983	7.55169e-06	4.64263e-07	4.23334e-05	0.000153822	7.8415e-05	2.8325e-05	0.000126182	0.000172947	2.67184e-07	0.000190912	3.65887e-05	3.35773e-05	7.10729e-05	3.47364e-05	0.000104946	4.96222e-05	3.03151e-06	1.02145e-05	7.3811e-07	1.07579e-06	3.46054e-05	2.61624e-05	2.5515e-07	8.1847e-08	5.40642e-05	4.93007e-07	2.87438e-06	2.87019e-06	3.00003e-05
9.25192	1.50212e-06	9.32899e-08	8.9343e-06	2.41306e-06	7.94554e-07	1.72338e-07	3.91e-07	4.845e-06	5.68849e-07	3.54314e-07	9.48631e-06	8.08937e-05	0.00110656	0.000158512	0.000113724	5.83074e-08	0.00038431	0.000181288	0.000146613	0.000378439	7.98094e-06	4.98571e-07	4.43001e-05	0.000160357	8.19298e-05	2.97839e-05	0.000131403	0.000180193	2.86999e-07	0.000198497	3.83035e-05	3.51641e-05	7.41572e-05	3.63656e-05	0.00010951	5.18651e-05	3.23228e-06	1.07733e-05	7.88438e-07	1.14855e-06	3.62787e-05	2.75055e-05	2.73512e-07	8.79545e-08	5.65634e-05	5.26185e-07	3.04726e-06	3.03787e-06	3.15534e-05
9.28172	1.5979e-06	1.00619e-07	9.45114e-06	2.56381e-06	8.46794e-07	1.84021e-07	4.19226e-07	5.12524e-06	6.07926e-07	3.79197e-07	1.00276e-05	8.45488e-05	0.00114264	0.000165554	0.000119162	6.29029e-08	0.000397168	0.000188456	0.000153078	0.000392334	8.433e-06	5.35303e-07	4.63509e-05	0.000167142	8.55883e-05	3.13134e-05	0.000136821	0.000187711	3.08228e-07	0.000206357	4.00932e-05	3.6821e-05	7.7366e-05	3.80667e-05	0.000114258	5.42025e-05	3.44572e-06	1.13609e-05	8.42045e-07	1.226e-06	3.80276e-05	2.89132e-05	2.9315e-07	9.45027e-08	5.91706e-05	5.61506e-07	3.23005e-06	3.21489e-06	3.31813e-05
9.31153	1.69949e-06	1.08502e-07	9.99633e-06	2.72353e-06	9.02319e-07	1.96465e-07	4.49406e-07	5.42086e-06	6.49566e-07	4.05752e-07	1.05981e-05	8.83564e-05	0.00117972	0.000172881	0.000124837	6.78465e-08	0.000410414	0.000195882	0.000159801	0.000406678	8.90899e-06	5.74625e-07	4.84891e-05	0.000174188	8.93957e-05	3.29167e-05	0.000142442	0.00019551	3.30966e-07	0.000214499	4.19609e-05	3.85512e-05	8.07041e-05	3.98428e-05	0.000119197	5.66382e-05	3.67259e-06	1.19787e-05	8.99133e-07	1.30843e-06	3.9855e-05	3.03883e-05	3.14148e-07	1.01522e-07	6.189e-05	5.99103e-07	3.42328e-06	3.40173e-06	3.48875e-05
9.34133	1.80724e-06	1.16978e-07	1.05713e-05	2.89272e-06	9.61326e-07	2.09718e-07	4.8167e-07	5.73267e-06	6.9393e-07	4.34087e-07	1.11994e-05	9.23224e-05	0.00121783	0.000180505	0.000130759	7.31634e-08	0.000424057	0.000203574	0.000166793	0.000421485	9.41008e-06	6.16709e-07	5.0718e-05	0.000181501	9.33573e-05	3.45972e-05	0.000148273	0.000203599	3.55317e-07	0.000222932	4.39096e-05	4.03574e-05	8.4176e-05	4.16969e-05	0.000124333	5.91759e-05	3.91368e-06	1.26281e-05	9.59917e-07	1.39615e-06	4.17643e-05	3.19339e-05	3.36597e-07	1.09045e-07	6.47262e-05	6.39115e-07	3.62751e-06	3.5989e-06	3.66752e-05
9.37113	1.92149e-06	1.26091e-07	1.11777e-05	3.0719e-06	1.02402e-06	2.2383e-07	5.16155e-07	6.06149e-06	7.41187e-07	4.64314e-07	1.1833e-05	9.64527e-05	0.00125698	0.000188436	0.000136937	7.88805e-08	0.000438108	0.00021154	0.000174062	0.000436766	9.93749e-06	6.61741e-07	5.30412e-05	0.000189092	9.74787e-05	3.63581e-05	0.000154321	0.000211987	3.8139e-07	0.000231666	4.59427e-05	4.22428e-05	8.77868e-05	4.36322e-05	0.000129674	6.18195e-05	4.16984e-06	1.33106e-05	1.02462e-06	1.48948e-06	4.37588e-05	3.35529e-05	3.60593e-07	1.17107e-07	6.76838e-05	6.8169e-07	3.84333e-06	3.80696e-06	3.85482e-05
9.40094	2.04261e-06	1.35886e-07	1.18169e-05	3.26162e-06	1.09063e-06	2.38855e-07	5.53007e-07	6.40821e-06	7.91516e-07	4.96555e-07	1.25004e-05	0.000100754	0.00129721	0.000196686	0.000143383	8.50266e-08	0.000452579	0.000219789	0.000181618	0.000452536	1.04925e-05	7.09917e-07	5.54623e-05	0.000196969	0.000101766	3.82032e-05	0.000160593	0.000220684	4.09302e-07	0.00024071	4.80633e-05	4.42106e-05	9.15416e-05	4.56521e-05	0.000135227	6.45732e-05	4.44197e-06	1.40279e-05	1.09349e-06	1.58875e-06	4.5842e-05	3.52487e-05	3.86239e-07	1.25745e-07	7.07676e-05	7.26985e-07	4.07136e-06	4.02645e-06	4.05101e-05
9.43074	2.171e-06	1.46412e-07	1.24908e-05	3.46249e-06	1.16137e-06	2.5485e-07	5.92381e-07	6.77374e-06	8.45107e-07	5.30936e-07	1.32035e-05	0.000105231	0.00133853	0.000205266	0.000150105	9.16325e-08	0.000467479	0.000228331	0.00018947	0.000468806	1.10764e-05	7.61446e-07	5.79848e-05	0.000205143	0.000106224	4.01361e-05	0.000167096	0.000229699	4.39177e-07	0.000250074	5.0275e-05	4.62641e-05	9.54454e-05	4.776e-05	0.000141	6.74409e-05	4.731e-06	1.47815e-05	1.16678e-06	1.69432e-06	4.80175e-05	3.70247e-05	4.13644e-07	1.34997e-07	7.39824e-05	7.75165e-07	4.31226e-06	4.25799e-06	4.25648e-05
9.46055	2.30707e-06	1.57722e-07	1.3201e-05	3.67511e-06	1.2365e-06	2.71873e-07	6.34441e-07	7.15904e-06	9.0216e-07	5.67593e-07	1.3944e-05	0.000109893	0.00138097	0.000214188	0.000157114	9.87312e-08	0.00048282	0.000237173	0.00019763	0.00048559	1.16907e-05	8.16549e-07	6.06128e-05	0.000213621	0.00011086	4.21608e-05	0.000173839	0.000239043	4.71147e-07	0.000259767	5.25815e-05	4.84067e-05	9.95039e-05	4.99594e-05	0.000147001	7.04272e-05	5.03792e-06	1.55732e-05	1.24475e-06	1.80658e-06	5.02891e-05	3.88843e-05	4.42923e-07	1.44908e-07	7.73336e-05	8.26406e-07	4.56672e-06	4.50218e-06	4.47162e-05
9.49035	2.45126e-06	1.6987e-07	1.39495e-05	3.90013e-06	1.31627e-06	2.89989e-07	6.79361e-07	7.56512e-06	9.62886e-07	6.0667e-07	1.47237e-05	0.000114744	0.00142455	0.000223463	0.000164422	1.06358e-07	0.000498614	0.000246326	0.000206107	0.000502901	1.23367e-05	8.75464e-07	6.33501e-05	0.000222416	0.00011568	4.42811e-05	0.000180828	0.000248726	5.05351e-07	0.000269801	5.49863e-05	5.0642e-05	0.000103723	5.22541e-05	0.000153237	7.35365e-05	5.36379e-06	1.64048e-05	1.32768e-06	1.92591e-06	5.26605e-05	4.08311e-05	4.74199e-07	1.5552e-07	8.08263e-05	8.80893e-07	4.83544e-06	4.7597e-06	4.69687e-05
9.52015	2.60401e-06	1.82917e-07	1.4738e-05	4.13823e-06	1.40095e-06	3.09264e-07	7.27326e-07	7.99303e-06	1.02751e-06	6.48317e-07	1.55446e-05	0.000119793	0.00146929	0.000233106	0.00017204	1.1455e-07	0.000514872	0.0002558	0.000214913	0.000520753	1.3016e-05	9.38439e-07	6.62009e-05	0.000231536	0.00012069	4.65014e-05	0.000188072	0.000258759	5.41941e-07	0.000280185	5.74934e-05	5.29736e-05	0.000108107	5.46479e-05	0.000159718	7.67734e-05	5.7097e-06	1.72781e-05	1.41589e-06	2.05276e-06	5.51359e-05	4.2869e-05	5.07603e-07	1.66883e-07	8.4466e-05	9.38821e-07	5.11919e-06	5.03122e-06	4.93265e-05
9.54996	2.76581e-06	1.96925e-07	1.55688e-05	4.39013e-06	1.49083e-06	3.2977e-07	7.78534e-07	8.44387e-06	1.09627e-06	6.92695e-07	1.64087e-05	0.000125047	0.00151522	0.000243128	0.000179979	1.23347e-07	0.000531606	0.000265603	0.000224059	0.000539161	1.37302e-05	1.00574e-06	6.91694e-05	0.000240993	0.000125897	4.88259e-05	0.000195578	0.000269151	5.81074e-07	0.00029093	6.01067e-05	5.54054e-05	0.000112664	5.71448e-05	0.000166452	8.01428e-05	6.07682e-06	1.81951e-05	1.50968e-06	2.18755e-06	5.77194e-05	4.50019e-05	5.43274e-07	1.79047e-07	8.82586e-05	1.0004e-06	5.41875e-06	5.31745e-06	5.17941e-05
9.57976	2.93718e-06	2.11963e-07	1.64437e-05	4.65659e-06	1.58622e-06	3.51582e-07	8.33192e-07	8.91881e-06	1.16942e-06	7.39976e-07	1.73182e-05	0.000130514	0.00156237	0.000253542	0.000188252	1.32793e-07	0.000548828	0.000275747	0.000233557	0.000558139	1.44808e-05	1.07766e-06	7.22599e-05	0.000250797	0.000131307	5.12592e-05	0.000203357	0.000279915	6.22919e-07	0.000302047	6.28303e-05	5.79414e-05	0.000117398	5.9749e-05	0.000173447	8.36494e-05	6.46639e-06	1.91577e-05	1.60938e-06	2.33076e-06	6.04152e-05	4.72339e-05	5.81359e-07	1.92066e-07	9.22099e-05	1.06584e-06	5.73496e-06	5.61917e-06	5.43761e-05
9.60956	3.11863e-06	2.28103e-07	1.73651e-05	4.9384e-06	1.68743e-06	3.74779e-07	8.91522e-07	9.41904e-06	1.24722e-06	7.90338e-07	1.82753e-05	0.0001362	0.00161075	0.000264363	0.000196871	1.42932e-07	0.000566551	0.000286241	0.000243417	0.000577701	1.52697e-05	1.15448e-06	7.54771e-05	0.000260959	0.000136928	5.3806e-05	0.000211415	0.000291062	6.67656e-07	0.000313548	6.56686e-05	6.05855e-05	0.000122317	6.24647e-05	0.000180713	8.72986e-05	6.87969e-06	2.01682e-05	1.71536e-06	2.4829e-06	6.32279e-05	4.95692e-05	6.22016e-07	2.05999e-07	9.63259e-05	1.13539e-06	6.0687e-06	5.93714e-06	5.70775e-05
9.63937	3.31073e-06	2.45421e-07	1.83353e-05	5.23639e-06	1.7948e-06	3.99445e-07	9.53757e-07	9.94584e-06	1.32995e-06	8.43973e-07	1.92824e-05	0.000142114	0.0016604	0.000275605	0.000205849	1.53814e-07	0.000584787	0.000297098	0.000253653	0.000597861	1.60986e-05	1.23653e-06	7.88255e-05	0.000271491	0.000142768	5.64712e-05	0.000219763	0.000302602	7.15476e-07	0.000325443	6.86259e-05	6.33421e-05	0.000127426	6.52964e-05	0.00018826	9.10954e-05	7.31808e-06	2.12286e-05	1.82798e-06	2.64448e-06	6.61621e-05	5.20123e-05	6.65409e-07	2.20906e-07	0.000100613	1.20927e-06	6.42086e-06	6.27221e-06	5.99032e-05
9.66917	3.51408e-06	2.64001e-07	1.93566e-05	5.55143e-06	1.90869e-06	4.2567e-07	1.02015e-06	1.05005e-05	1.41792e-06	9.01083e-07	2.03418e-05	0.000148265	0.00171133	0.000287283	0.0002152	1.65491e-07	0.00060355	0.000308326	0.000264276	0.000618636	1.69695e-05	1.32416e-06	8.23099e-05	0.000282404	0.000148832	5.92598e-05	0.000228409	0.000314549	7.66581e-07	0.000337746	7.17068e-05	6.62155e-05	0.000132734	6.82487e-05	0.000196097	9.50455e-05	7.78301e-06	2.23413e-05	1.94764e-06	2.81606e-06	6.92225e-05	5.45677e-05	7.11716e-07	2.36853e-07	0.000105078	1.28776e-06	6.79242e-06	6.62523e-06	6.28585e-05
9.69898	3.72929e-06	2.83929e-07	2.04317e-05	5.88444e-06	2.02947e-06	4.53547e-07	1.09095e-06	1.10845e-05	1.51142e-06	9.61881e-07	2.14561e-05	0.000154661	0.00176358	0.000299411	0.000224936	1.78017e-07	0.000622852	0.000319939	0.0002753	0.000640041	1.78841e-05	1.4177e-06	8.59354e-05	0.00029371	0.00015513	6.21771e-05	0.000237363	0.000326914	8.21187e-07	0.000350469	7.49159e-05	6.92102e-05	0.000138246	7.13264e-05	0.000204234	9.91544e-05	8.27599e-06	2.35087e-05	2.07475e-06	2.99821e-06	7.2414e-05	5.72402e-05	7.61125e-07	2.5391e-07	0.000109727	1.37112e-06	7.18438e-06	6.99712e-06	6.59487e-05
9.72878	3.95701e-06	3.05299e-07	2.1563e-05	6.23639e-06	2.15753e-06	4.83176e-07	1.16646e-06	1.16992e-05	1.61079e-06	1.02659e-06	2.2628e-05	0.00016131	0.00181716	0.000312005	0.000235072	1.91452e-07	0.000642707	0.000331946	0.000286739	0.000662091	1.88446e-05	1.51756e-06	8.9707e-05	0.000305423	0.000161669	6.52287e-05	0.000246635	0.000339711	8.79524e-07	0.000363623	7.82583e-05	7.23308e-05	0.000143969	7.45344e-05	0.000212682	0.000103428	8.7986e-06	2.47333e-05	2.20975e-06	3.19157e-06	7.57418e-05	6.00348e-05	8.13833e-07	2.7215e-07	0.000114567	1.45964e-06	7.59778e-06	7.38882e-06	6.91795e-05
9.75858	4.19794e-06	3.28211e-07	2.27534e-05	6.60828e-06	2.2933e-06	5.14663e-07	1.24695e-06	1.23461e-05	1.71639e-06	1.09546e-06	2.38602e-05	0.000168223	0.00187212	0.00032508	0.000245623	2.05859e-07	0.000663129	0.000344361	0.000298605	0.000684803	1.98531e-05	1.62412e-06	9.36301e-05	0.000317553	0.000168457	6.842e-05	0.000256234	0.00035295	9.41833e-07	0.000377222	8.17389e-05	7.55824e-05	0.000149912	7.78779e-05	0.000221451	0.000107872	9.35254e-06	2.60176e-05	2.3531e-06	3.39678e-06	7.92112e-05	6.29567e-05	8.70052e-07	2.91654e-07	0.000119606	1.55363e-06	8.03374e-06	7.80132e-06	7.25568e-05
9.78839	4.45278e-06	3.5277e-07	2.40058e-05	7.0012e-06	2.4372e-06	5.48118e-07	1.33276e-06	1.30269e-05	1.82857e-06	1.16873e-06	2.51556e-05	0.000175407	0.00192846	0.000338654	0.000256604	2.21305e-07	0.000684131	0.000357195	0.000310912	0.000708193	2.09118e-05	1.73783e-06	9.77101e-05	0.000330115	0.000175503	7.17572e-05	0.000266171	0.000366646	1.00837e-06	0.000391278	8.5363e-05	7.89697e-05	0.000156082	8.13621e-05	0.000230552	0.000112493	9.93957e-06	2.73643e-05	2.50528e-06	3.61451e-06	8.28277e-05	6.60111e-05	9.30005e-07	3.12503e-07	0.000124851	1.6534e-06	8.49342e-06	8.23567e-06	7.60864e-05
9.81819	4.72231e-06	3.79089e-07	2.53231e-05	7.41623e-06	2.58971e-06	5.83659e-07	1.4242e-06	1.37431e-05	1.94774e-06	1.24668e-06	2.65174e-05	0.000182874	0.00198622	0.000352743	0.000268031	2.37861e-07	0.000705729	0.000370461	0.000323675	0.000732276	2.2023e-05	1.85913e-06	0.000101953	0.000343122	0.000182814	7.52462e-05	0.000276455	0.000380813	1.07942e-06	0.000405806	8.91359e-05	8.24981e-05	0.000162486	8.49926e-05	0.000239997	0.000117297	1.05615e-05	2.87763e-05	2.66682e-06	3.8455e-06	8.65968e-05	6.92037e-05	9.93931e-07	3.34788e-07	0.00013031	1.75929e-06	8.97802e-06	8.69296e-06	7.97747e-05
9.84799	5.00732e-06	4.0729e-07	2.67086e-05	7.85457e-06	2.75131e-06	6.21411e-07	1.52163e-06	1.44965e-05	2.07429e-06	1.32958e-06	2.79485e-05	0.000190633	0.00204543	0.000367365	0.000279918	2.55604e-07	0.000727937	0.000384171	0.000336909	0.000757071	2.3189e-05	1.9885e-06	0.000106363	0.000356587	0.000190401	7.88935e-05	0.000287099	0.000395463	1.15526e-06	0.000420819	9.30633e-05	8.61729e-05	0.000169133	8.87752e-05	0.000249797	0.000122291	1.12204e-05	3.02565e-05	2.83826e-06	4.0905e-06	9.05244e-05	7.25402e-05	1.06208e-06	3.58603e-07	0.000135991	1.87166e-06	9.48882e-06	9.17433e-06	8.36282e-05
9.8778	5.30864e-06	4.37499e-07	2.81654e-05	8.31743e-06	2.9225e-06	6.61504e-07	1.62542e-06	1.5289e-05	2.20867e-06	1.41773e-06	2.94525e-05	0.000198695	0.00210612	0.000382538	0.000292284	2.74614e-07	0.000750769	0.000398339	0.000350628	0.000782595	2.44124e-05	2.12646e-06	0.000110948	0.000370524	0.000198271	8.27056e-05	0.000298114	0.00041061	1.2362e-06	0.000436331	9.71508e-05	8.99995e-05	0.000176031	9.27156e-05	0.000259965	0.000127482	1.19182e-05	3.18078e-05	3.02015e-06	4.35032e-06	9.46166e-05	7.60267e-05	1.13472e-06	3.84049e-07	0.000141901	1.99089e-06	1.00271e-05	9.68096e-06	8.76536e-05
9.9076	5.62715e-06	4.69852e-07	2.9697e-05	8.80611e-06	3.10384e-06	7.04078e-07	1.73596e-06	1.61224e-05	2.35132e-06	1.51146e-06	3.10326e-05	0.000207069	0.0021683	0.00039828	0.000305144	2.94978e-07	0.000774241	0.000412977	0.000364849	0.000808864	2.56958e-05	2.27355e-06	0.000115714	0.000384947	0.000206435	8.66894e-05	0.000309509	0.00042627	1.32258e-06	0.000452356	0.000101405	9.39838e-05	0.000183189	9.682e-05	0.000270512	0.000132876	1.26572e-05	3.34335e-05	3.21311e-06	4.6258e-06	9.88796e-05	7.96692e-05	1.21213e-06	4.11232e-07	0.00014805	2.11737e-06	1.05944e-05	1.02141e-05	9.18578e-05
9.93741	5.96379e-06	5.04496e-07	3.1307e-05	9.32196e-06	3.29588e-06	7.49278e-07	1.85368e-06	1.69986e-05	2.50274e-06	1.61109e-06	3.26925e-05	0.000215768	0.00223202	0.00041461	0.000318517	3.16788e-07	0.000798369	0.0004281	0.000379587	0.000835897	2.70418e-05	2.43033e-06	0.000120666	0.000399872	0.000214901	9.08521e-05	0.000321298	0.000442456	1.41473e-06	0.000468911	0.000105831	9.81315e-05	0.000190616	0.000101095	0.000281451	0.000138482	1.34395e-05	3.51369e-05	3.41777e-06	4.91783e-06	0.00010332	8.34744e-05	1.29462e-06	4.40267e-07	0.000154446	2.25152e-06	1.1192e-05	1.07751e-05	9.6248e-05
9.96721	6.31951e-06	5.41584e-07	3.29991e-05	9.86639e-06	3.49923e-06	7.97261e-07	1.979e-06	1.79198e-05	2.66343e-06	1.71697e-06	3.44359e-05	0.000224802	0.00229729	0.000431547	0.000332421	3.40142e-07	0.000823168	0.000443722	0.000394859	0.000863713	2.84533e-05	2.59742e-06	0.000125812	0.000415313	0.00022368	9.52008e-05	0.000333493	0.000459184	1.51303e-06	0.000486008	0.000110435	0.000102449	0.00019832	0.000105547	0.000292795	0.000144305	1.42676e-05	3.69213e-05	3.63479e-06	5.22733e-06	0.000107944	8.74489e-05	1.38249e-06	4.71274e-07	0.000161099	2.39379e-06	1.18215e-05	1.13652e-05	0.000100832
9.99701	6.69533e-06	5.8128e-07	3.47772e-05	1.04409e-05	3.71452e-06	8.48189e-07	2.1124e-06	1.88881e-05	2.83392e-06	1.82949e-06	3.62668e-05	0.000234183	0.00236415	0.000449113	0.000346873	3.65144e-07	0.000848654	0.000459857	0.000410682	0.000892328	2.99332e-05	2.77546e-06	0.000131158	0.000431286	0.000232782	9.97434e-05	0.000346104	0.000476469	1.61786e-06	0.000503666	0.000115225	0.000106942	0.000206311	0.000110182	0.000304559	0.000150355	1.5144e-05	3.87903e-05	3.86488e-06	5.55531e-06	0.000112759	9.15996e-05	1.47609e-06	5.0438e-07	0.000168017	2.54463e-06	1.24846e-05	1.1986e-05	0.000105617
10.0268	7.09233e-06	6.23758e-07	3.66454e-05	1.1047e-05	3.94239e-06	9.02235e-07	2.25438e-06	1.99058e-05	3.01479e-06	1.94902e-06	3.81892e-05	0.000243923	0.00243262	0.000467327	0.000361894	3.91904e-07	0.000874844	0.00047652	0.000427072	0.000921762	3.14845e-05	2.96512e-06	0.000136711	0.000447807	0.000242217	0.000104488	0.000359146	0.000494326	1.72965e-06	0.000521898	0.000120207	0.000111618	0.000214599	0.000115008	0.000316755	0.000156639	1.60714e-05	4.07476e-05	4.10877e-06	5.90279e-06	0.000117772	9.59339e-05	1.57577e-06	5.39723e-07	0.000175211	2.70454e-06	1.31828e-05	1.26389e-05	0.000110611
10.0566	7.51163e-06	6.69205e-07	3.86079e-05	1.16864e-05	4.18356e-06	9.5958e-07	2.40544e-06	2.09752e-05	3.20662e-06	2.07599e-06	4.02075e-05	0.000254035	0.00250274	0.000486211	0.000377503	4.20541e-07	0.000901755	0.000493725	0.000444047	0.000952035	3.31104e-05	3.16714e-06	0.000142478	0.000464891	0.000251995	0.000109442	0.000372632	0.000512772	1.84883e-06	0.000540721	0.000125388	0.000116482	0.000223195	0.000120032	0.000329397	0.000163165	1.70525e-05	4.27971e-05	4.36724e-06	6.27087e-06	0.00012299	0.000100459	1.68191e-06	5.77446e-07	0.000182689	2.87404e-06	1.39179e-05	1.33254e-05	0.000115822
10.0864	7.9544e-06	7.17817e-07	4.06691e-05	1.23608e-05	4.43876e-06	1.02042e-06	2.56614e-06	2.20986e-05	3.41005e-06	2.21083e-06	4.2326e-05	0.000264531	0.00257454	0.000505787	0.00039372	4.5118e-07	0.000929403	0.000511488	0.000461627	0.000983165	3.48142e-05	3.38226e-06	0.000148467	0.000482555	0.000262128	0.000114615	0.000386574	0.000531822	1.97585e-06	0.000560153	0.000130775	0.000121543	0.000232107	0.000125262	0.000342501	0.000169941	1.80901e-05	4.49427e-05	4.64111e-06	6.66069e-06	0.000128421	0.000105183	1.79491e-06	6.17703e-07	0.000190464	3.05366e-06	1.46919e-05	1.40472e-05	0.00012126
10.1162	8.42188e-06	7.69805e-07	4.28337e-05	1.30719e-05	4.70874e-06	1.08495e-06	2.73707e-06	2.32788e-05	3.62574e-06	2.35401e-06	4.45493e-05	0.000275425	0.00264804	0.000526078	0.000410566	4.83954e-07	0.000957807	0.000529825	0.000479828	0.00101517	3.65994e-05	3.61131e-06	0.000154685	0.000500817	0.000272627	0.000120015	0.000400986	0.000551494	2.11123e-06	0.00058021	0.000136376	0.000126807	0.000241347	0.000130705	0.000356082	0.000176977	1.91875e-05	4.71885e-05	4.93124e-06	7.07347e-06	0.000134073	0.000110114	1.91519e-06	6.60657e-07	0.000198545	3.24399e-06	1.55065e-05	1.4806e-05	0.000126932
10.146	8.91536e-06	8.2539e-07	4.51065e-05	1.38216e-05	4.99433e-06	1.15339e-06	2.91883e-06	2.45184e-05	3.85438e-06	2.506e-06	4.68825e-05	0.00028673	0.00272327	0.000547106	0.000428063	5.19005e-07	0.000986984	0.000548753	0.000498671	0.00104808	3.84694e-05	3.85512e-06	0.000161139	0.000519693	0.000283504	0.000125651	0.000415883	0.000571804	2.25547e-06	0.000600909	0.000142198	0.000132281	0.000250925	0.000136369	0.000370154	0.000184281	2.03477e-05	4.9539e-05	5.23854e-06	7.51046e-06	0.000139953	0.00011526	2.0432e-06	7.06479e-07	0.000206943	3.44562e-06	1.63637e-05	1.56036e-05	0.000132848
10.1758	9.4362e-06	8.84808e-07	4.74925e-05	1.4612e-05	5.29637e-06	1.22597e-06	3.11208e-06	2.58201e-05	4.09671e-06	2.66733e-06	4.93303e-05	0.000298461	0.00280027	0.000568896	0.000446233	5.56484e-07	0.00101695	0.000568287	0.000518176	0.0010819	4.04281e-05	4.11461e-06	0.000167839	0.000539203	0.000294769	0.000131533	0.000431278	0.000592771	2.40913e-06	0.000622269	0.00014825	0.000137974	0.000260854	0.000142263	0.000384733	0.000191863	2.15742e-05	5.19984e-05	5.56395e-06	7.97302e-06	0.00014607	0.00012063	2.17941e-06	7.55353e-07	0.000215669	3.65919e-06	1.72658e-05	1.64418e-05	0.000139018
10.2056	9.98583e-06	9.48313e-07	4.99969e-05	1.5445e-05	5.61576e-06	1.30292e-06	3.3175e-06	2.71869e-05	4.35351e-06	2.83854e-06	5.18982e-05	0.000310631	0.00287907	0.000591472	0.000465099	5.96549e-07	0.00104773	0.000588444	0.000538361	0.00111666	4.24792e-05	4.39073e-06	0.000174793	0.000559363	0.000306436	0.000137671	0.000447187	0.000614411	2.57279e-06	0.000644308	0.000154539	0.000143893	0.000271144	0.000148395	0.000399837	0.000199731	2.28705e-05	5.45716e-05	5.90848e-06	8.46253e-06	0.000152433	0.000126233	2.32432e-06	8.07473e-07	0.000224736	3.88537e-06	1.82148e-05	1.73226e-05	0.000145452
10.2354	1.05657e-05	1.01617e-06	5.26252e-05	1.63228e-05	5.95344e-06	1.3845e-06	3.53582e-06	2.86217e-05	4.62557e-06	3.0202e-06	5.45915e-05	0.000323256	0.00295969	0.00061486	0.000484683	6.39373e-07	0.00107933	0.000609242	0.000559249	0.00115238	4.46268e-05	4.68449e-06	0.000182008	0.000580193	0.000318516	0.000144075	0.000463625	0.000636743	2.74707e-06	0.000667044	0.000161075	0.000150046	0.000281807	0.000154775	0.000415481	0.000207897	2.42403e-05	5.72633e-05	6.27318e-06	8.98047e-06	0.000159051	0.000132078	2.47846e-06	8.63045e-07	0.000234155	4.12486e-06	1.92131e-05	1.82479e-05	0.000152158
10.2652	1.11775e-05	1.08866e-06	5.53831e-05	1.72477e-05	6.31038e-06	1.47096e-06	3.7678e-06	3.01277e-05	4.91378e-06	3.21291e-06	5.7416e-05	0.000336351	0.00304218	0.000639085	0.000505012	6.85134e-07	0.00111179	0.000630699	0.00058086	0.00118908	4.6875e-05	4.99695e-06	0.000189494	0.000601711	0.000331022	0.000150756	0.000480607	0.000659785	2.93263e-06	0.000690496	0.000167865	0.000156441	0.000292856	0.00016141	0.000431683	0.000216369	2.56874e-05	6.00785e-05	6.65915e-06	9.5284e-06	0.000165932	0.000138176	2.64239e-06	9.22287e-07	0.000243938	4.3784e-06	2.02631e-05	1.922e-05	0.000159149
10.2951	1.18227e-05	1.16609e-06	5.82764e-05	1.8222e-05	6.68764e-06	1.5626e-06	4.01424e-06	3.17083e-05	5.21901e-06	3.41731e-06	6.03776e-05	0.000349931	0.00312655	0.000664175	0.000526108	7.34025e-07	0.00114511	0.000652832	0.000603215	0.00122678	4.92282e-05	5.32925e-06	0.000197259	0.000623938	0.000343968	0.000157723	0.000498149	0.000683557	3.13015e-06	0.000714685	0.000174919	0.000163087	0.000304304	0.000168312	0.000448461	0.000225159	2.7216e-05	6.30224e-05	7.06755e-06	1.01079e-05	0.000173086	0.000144535	2.8167e-06	9.8543e-07	0.0002541	4.64678e-06	2.13672e-05	2.0241e-05	0.000166434
10.3249	1.25032e-05	1.24877e-06	6.13114e-05	1.92482e-05	7.08629e-06	1.6597e-06	4.276e-06	3.33668e-05	5.54223e-06	3.63406e-06	6.34825e-05	0.000364014	0.00321285	0.000690156	0.000547998	7.8625e-07	0.00117931	0.00067566	0.000626338	0.00126551	5.16908e-05	5.68258e-06	0.000205313	0.000646894	0.000357367	0.00016499	0.000516268	0.000708077	3.34038e-06	0.000739629	0.000182246	0.000169994	0.000316162	0.000175489	0.000465831	0.000234276	2.88303e-05	6.61004e-05	7.49961e-06	1.07208e-05	0.000180523	0.000151167	3.00202e-06	1.05272e-06	0.000264651	4.93082e-06	2.25281e-05	2.13132e-05	0.000174025
10.3547	1.32206e-05	1.33704e-06	6.44944e-05	2.03289e-05	7.50749e-06	1.76257e-06	4.55397e-06	3.51068e-05	5.88443e-06	3.86387e-06	6.67371e-05	0.000378615	0.00330111	0.000717058	0.000570707	8.42024e-07	0.00121443	0.000699202	0.000650251	0.00130529	5.42676e-05	6.05819e-06	0.000213666	0.000670599	0.000371232	0.000172566	0.000534981	0.000733366	3.56409e-06	0.00076535	0.000189856	0.000177169	0.000328446	0.000182953	0.000483814	0.000243733	3.05348e-05	6.93181e-05	7.9566e-06	1.13688e-05	0.000188252	0.000158082	3.199e-06	1.12441e-06	0.000275607	5.23137e-06	2.37486e-05	2.2439e-05	0.000181934
10.3845	1.3977e-05	1.43127e-06	6.78323e-05	2.14667e-05	7.95242e-06	1.87154e-06	4.84911e-06	3.6932e-05	6.24666e-06	4.10749e-06	7.01482e-05	0.000393752	0.00339136	0.000744909	0.000594264	9.01577e-07	0.00125047	0.000723477	0.000674978	0.00134614	5.69634e-05	6.45743e-06	0.000222328	0.000695074	0.000385577	0.000180465	0.000554305	0.000759443	3.80209e-06	0.000791869	0.000197759	0.000184624	0.000341167	0.000190712	0.000502428	0.000253539	3.23342e-05	7.26812e-05	8.43986e-06	1.20538e-05	0.000196285	0.000165291	3.40835e-06	1.20079e-06	0.000286982	5.54934e-06	2.50313e-05	2.36209e-05	0.000190172
10.4143	1.47742e-05	1.53182e-06	7.13318e-05	2.26645e-05	8.42236e-06	1.98696e-06	5.1624e-06	3.88464e-05	6.63003e-06	4.3657e-06	7.37227e-05	0.000409443	0.00348363	0.000773739	0.000618695	9.65153e-07	0.00128746	0.000748506	0.000700542	0.00138807	5.97833e-05	6.88169e-06	0.000231307	0.00072034	0.000400417	0.0001887	0.000574257	0.000786329	4.05526e-06	0.000819206	0.000205964	0.000192366	0.000354341	0.000198779	0.000521693	0.000263708	3.42334e-05	7.61959e-05	8.95081e-06	1.27778e-05	0.000204631	0.000172807	3.63081e-06	1.28214e-06	0.000298788	5.88569e-06	2.63795e-05	2.48615e-05	0.000198752
10.4441	1.56143e-05	1.63911e-06	7.50004e-05	2.39253e-05	8.91863e-06	2.10919e-06	5.49491e-06	4.08538e-05	7.0357e-06	4.63932e-06	7.74678e-05	0.000425706	0.00357796	0.000803579	0.000644029	1.03301e-06	0.00132542	0.000774307	0.000726968	0.00143113	6.27326e-05	7.33246e-06	0.000240616	0.000746421	0.000415767	0.000197282	0.000594856	0.000814046	4.3245e-06	0.000847384	0.000214483	0.000200407	0.000367983	0.000207164	0.000541629	0.00027425	3.62375e-05	7.98684e-05	9.49092e-06	1.35429e-05	0.000213302	0.000180641	3.86715e-06	1.36876e-06	0.000311043	6.24142e-06	2.77961e-05	2.61637e-05	0.000207686
10.4739	1.64996e-05	1.75357e-06	7.88455e-05	2.52521e-05	9.4426e-06	2.23862e-06	5.84774e-06	4.29586e-05	7.46489e-06	4.92922e-06	8.13912e-05	0.00044256	0.00367438	0.000834461	0.000670296	1.10542e-06	0.00136438	0.000800902	0.000754282	0.00147533	6.58165e-05	7.81131e-06	0.000250264	0.000773338	0.000431641	0.000206225	0.000616121	0.000842614	4.6108e-06	0.000876424	0.000223326	0.000208757	0.000382106	0.000215879	0.000562256	0.000285179	3.83519e-05	8.3705e-05	1.00618e-05	1.43512e-05	0.000222309	0.000188805	4.11819e-06	1.461e-06	0.00032376	6.61757e-06	2.92844e-05	2.75301e-05	0.000216988
10.5037	1.74322e-05	1.87563e-06	8.28749e-05	2.66481e-05	9.99574e-06	2.37564e-06	6.22206e-06	4.5165e-05	7.91888e-06	5.23631e-06	8.55007e-05	0.000460025	0.00377292	0.000866417	0.000697525	1.18268e-06	0.00140435	0.000828312	0.000782508	0.00152069	6.9041e-05	8.31989e-06	0.000260262	0.000801115	0.000448056	0.000215544	0.00063807	0.000872055	4.91516e-06	0.00090635	0.000232505	0.000217426	0.000396727	0.000224936	0.000583595	0.000296506	4.05823e-05	8.77126e-05	1.06649e-05	1.5205e-05	0.000231663	0.000197313	4.38481e-06	1.55918e-06	0.000336956	7.01527e-06	3.08478e-05	2.89638e-05	0.000226671
10.5335	1.84145e-05	2.0058e-06	8.7097e-05	2.81168e-05	1.05796e-05	2.52068e-06	6.6191e-06	4.74777e-05	8.39902e-06	5.56156e-06	8.98045e-05	0.00047812	0.00387363	0.000899481	0.000725748	1.26509e-06	0.00144535	0.000856559	0.000811675	0.00156725	7.24118e-05	8.85996e-06	0.000270622	0.000829775	0.000465026	0.000225253	0.000660723	0.000902392	5.23867e-06	0.000937185	0.000242031	0.000226426	0.000411861	0.000234347	0.000605668	0.000308246	4.29345e-05	9.18981e-05	1.13022e-05	1.61068e-05	0.000241377	0.000206178	4.66792e-06	1.66368e-06	0.000350647	7.43567e-06	3.24899e-05	3.04679e-05	0.000236749
10.5633	1.94491e-05	2.14456e-06	9.15201e-05	2.96616e-05	1.11957e-05	2.67418e-06	7.04015e-06	4.99014e-05	8.90674e-06	5.90597e-06	9.43111e-05	0.000496866	0.00397653	0.000933688	0.000754996	1.35298e-06	0.00148742	0.000885664	0.000841809	0.00161502	7.5935e-05	9.43335e-06	0.000281356	0.000859342	0.000482568	0.000235366	0.000684101	0.000933648	5.58248e-06	0.000968953	0.000251915	0.000235767	0.000427525	0.000244126	0.000628498	0.00032041	4.54147e-05	9.62687e-05	1.19753e-05	1.7059e-05	0.000251462	0.000215414	4.96848e-06	1.77489e-06	0.00036485	7.87999e-06	3.42143e-05	3.20455e-05	0.000247237
10.5931	2.05385e-05	2.29247e-06	9.61531e-05	3.12862e-05	1.18458e-05	2.83663e-06	7.48659e-06	5.24411e-05	9.44352e-06	6.27062e-06	9.90294e-05	0.000516283	0.00408167	0.000969072	0.000785302	1.44669e-06	0.00153057	0.00091565	0.000872938	0.00166403	7.9617e-05	1.0042e-05	0.000292475	0.000889842	0.000500699	0.000245899	0.000708224	0.000965845	5.94779e-06	0.00100168	0.000262171	0.000245462	0.000443735	0.000254284	0.000652106	0.000333014	4.80294e-05	0.000100832	1.26861e-05	1.80644e-05	0.000261932	0.000225035	5.28753e-06	1.89321e-06	0.000379582	8.34952e-06	3.60249e-05	3.37001e-05	0.000258149
10.6229	2.16854e-05	2.45009e-06	0.000101005	3.29944e-05	1.25317e-05	3.0085e-06	7.95986e-06	5.51017e-05	1.00109e-05	6.65663e-06	0.000103969	0.000536395	0.00418908	0.00100567	0.0008167	1.5466e-06	0.00157484	0.000946541	0.00090509	0.00171431	8.34644e-05	1.0688e-05	0.000303991	0.0009213	0.000519436	0.000256868	0.000733113	0.000999008	6.33587e-06	0.00103538	0.00027281	0.000255521	0.000460509	0.000264836	0.000676517	0.000346071	5.07853e-05	0.000105595	1.34365e-05	1.91256e-05	0.0002728	0.000235056	5.62613e-06	2.01907e-06	0.00039486	8.8456e-06	3.79258e-05	3.54351e-05	0.000269502
10.6527	2.28927e-05	2.61802e-06	0.000106086	3.47903e-05	1.32551e-05	3.19034e-06	8.46146e-06	5.78887e-05	1.06106e-05	7.06517e-06	0.000109138	0.000557224	0.0042988	0.00104352	0.000849224	1.6531e-06	0.00162023	0.000978359	0.000938295	0.00176588	8.7484e-05	1.13735e-05	0.000315918	0.000953742	0.000538796	0.000268289	0.00075879	0.00103316	6.74806e-06	0.0010701	0.000283847	0.000265959	0.000477864	0.000275796	0.000701755	0.000359595	5.36894e-05	0.000110567	1.42288e-05	2.02456e-05	0.000284078	0.000245492	5.98543e-06	2.15293e-06	0.000410703	9.36965e-06	3.9921e-05	3.72542e-05	0.00028131
10.6825	2.41633e-05	2.7969e-06	0.000111406	3.6678e-05	1.40181e-05	3.38267e-06	8.99299e-06	6.08077e-05	1.12443e-05	7.49748e-06	0.000114548	0.000578791	0.00441086	0.00108266	0.000882909	1.76658e-06	0.00166678	0.00101113	0.000972583	0.00181877	9.16829e-05	1.21008e-05	0.000328267	0.000987194	0.000558796	0.000280179	0.000785278	0.00106833	7.18579e-06	0.00110585	0.000295293	0.000276787	0.000495819	0.000287177	0.000727842	0.000373602	5.67492e-05	0.000115755	1.50649e-05	2.14274e-05	0.000295781	0.000256361	6.36661e-06	2.29529e-06	0.000427129	9.92316e-06	4.20151e-05	3.91612e-05	0.00029359
10.7123	2.55004e-05	2.98741e-06	0.000116974	3.86619e-05	1.48226e-05	3.58609e-06	9.55613e-06	6.38643e-05	1.19137e-05	7.95487e-06	0.000120209	0.000601122	0.0045253	0.00112313	0.000917792	1.8875e-06	0.00171452	0.00104487	0.00100798	0.00187301	9.60686e-05	1.28722e-05	0.000341053	0.00102168	0.000579456	0.000292556	0.000812598	0.00110453	7.65054e-06	0.00114265	0.000307164	0.000288019	0.000514392	0.000298996	0.000754806	0.000388108	5.99723e-05	0.000121169	1.59473e-05	2.26742e-05	0.000307923	0.000267677	6.77095e-06	2.44664e-06	0.000444159	1.05077e-05	4.42126e-05	4.116e-05	0.00030636
10.7421	2.69071e-05	3.19027e-06	0.000122802	4.07466e-05	1.56707e-05	3.80119e-06	1.01526e-05	6.70646e-05	1.26209e-05	8.4387e-06	0.000126132	0.000624241	0.00464217	0.00116497	0.00095391	2.0163e-06	0.00176346	0.00107962	0.00104453	0.00192863	0.000100649	1.36904e-05	0.000354289	0.00105724	0.000600793	0.000305439	0.000840776	0.00114181	8.14391e-06	0.00118055	0.000319473	0.000299667	0.000533603	0.000311267	0.000782671	0.000403127	6.33668e-05	0.000126817	1.68781e-05	2.39894e-05	0.000320518	0.000279459	7.19977e-06	2.60752e-06	0.000461812	1.11248e-05	4.65181e-05	4.32548e-05	0.000319636
10.7719	2.8387e-05	3.40622e-06	0.000128901	4.29367e-05	1.65648e-05	4.02863e-06	1.07844e-05	7.04149e-05	1.33678e-05	8.95043e-06	0.000132327	0.000648173	0.00476149	0.00120822	0.000991302	2.15349e-06	0.00181365	0.0011154	0.00108226	0.00198565	0.000105431	1.45579e-05	0.000367989	0.00109389	0.000622827	0.000318845	0.000869834	0.00118017	8.66756e-06	0.00121956	0.000332235	0.000311747	0.000553471	0.000324006	0.000811464	0.000418676	6.6941e-05	0.000132708	1.786e-05	2.53764e-05	0.000333582	0.000291723	7.65447e-06	2.77851e-06	0.000480108	1.17763e-05	4.89368e-05	4.54498e-05	0.000333437
10.8017	2.99434e-05	3.63606e-06	0.000135282	4.52373e-05	1.75071e-05	4.26906e-06	1.14533e-05	7.39215e-05	1.41565e-05	9.49155e-06	0.000138807	0.000672944	0.00488332	0.00125293	0.00103001	2.29958e-06	0.00186509	0.00115222	0.00112119	0.00204411	0.000110424	1.54777e-05	0.000382167	0.00113166	0.000645577	0.000332794	0.000899798	0.00121965	9.22323e-06	0.00125971	0.000345465	0.000324271	0.000574017	0.00033723	0.000841211	0.000434772	7.07038e-05	0.000138851	1.88955e-05	2.6839e-05	0.00034713	0.000304489	8.13655e-06	2.96022e-06	0.000499068	1.2464e-05	5.14737e-05	4.77494e-05	0.000347781
10.8315	3.15802e-05	3.88066e-06	0.000141958	4.76536e-05	1.85001e-05	4.5232e-06	1.21614e-05	7.75913e-05	1.49892e-05	1.00637e-05	0.000145583	0.00069858	0.00500768	0.00129914	0.00107006	2.45511e-06	0.00191783	0.00119013	0.00116137	0.00210403	0.000115636	1.64527e-05	0.000396838	0.00117059	0.000669063	0.000347306	0.000930693	0.00126028	9.81279e-06	0.00130103	0.000359179	0.000337255	0.000595262	0.000350955	0.000871941	0.000451432	7.46644e-05	0.000145258	1.99873e-05	2.83808e-05	0.000361178	0.000317775	8.64754e-06	3.15327e-06	0.000518714	1.31898e-05	5.41343e-05	5.01584e-05	0.000362687
10.8613	3.33012e-05	4.14088e-06	0.000148941	5.01908e-05	1.95463e-05	4.79179e-06	1.29109e-05	8.14312e-05	1.58681e-05	1.06685e-05	0.000152668	0.00072511	0.00513463	0.00134689	0.00111152	2.62067e-06	0.00197189	0.00122915	0.00120283	0.00216544	0.000121076	1.7486e-05	0.000412018	0.0012107	0.000693306	0.000362403	0.000962544	0.00130209	1.04382e-05	0.00134355	0.000373393	0.000350715	0.000617226	0.000365198	0.00090368	0.000468673	7.88322e-05	0.000151938	2.11383e-05	3.00061e-05	0.000375742	0.000331601	9.1891e-06	3.35834e-06	0.000539069	1.39555e-05	5.69242e-05	5.26816e-05	0.000378175
10.8911	3.51104e-05	4.41768e-06	0.000156244	5.28547e-05	2.06484e-05	5.07562e-06	1.37041e-05	8.54485e-05	1.67959e-05	1.13077e-05	0.000160075	0.000752561	0.00526421	0.00139624	0.00115441	2.79687e-06	0.00202729	0.0012693	0.0012456	0.00222838	0.000126753	1.85809e-05	0.000427721	0.00125202	0.000718326	0.000378105	0.00099538	0.00134509	1.11015e-05	0.00138731	0.000388123	0.000364665	0.000639933	0.000379979	0.00093646	0.000486513	8.32173e-05	0.000158901	2.23514e-05	3.17189e-05	0.000390839	0.000345987	9.76295e-06	3.57613e-06	0.000560155	1.47634e-05	5.98492e-05	5.53239e-05	0.000394265
10.9209	3.7012e-05	4.71207e-06	0.00016388	5.5651e-05	2.18093e-05	5.3755e-06	1.45433e-05	8.96508e-05	1.77748e-05	1.19831e-05	0.000167818	0.000780962	0.00539644	0.00144723	0.00119878	2.98435e-06	0.00208407	0.00131062	0.00128973	0.00229287	0.000132678	1.97409e-05	0.000443964	0.0012946	0.000744144	0.000394434	0.00102923	0.00138933	1.18048e-05	0.00143233	0.000403386	0.000379121	0.000663405	0.000395314	0.000970307	0.000504972	8.783e-05	0.000166158	2.36298e-05	3.35237e-05	0.000406487	0.000360955	1.03709e-05	3.80741e-06	0.000581996	1.56155e-05	6.29154e-05	5.80906e-05	0.000410978
10.9507	3.90105e-05	5.02508e-06	0.000171864	5.85859e-05	2.30318e-05	5.69229e-06	1.54311e-05	9.4046e-05	1.88077e-05	1.26968e-05	0.000175911	0.000810345	0.00553139	0.00149991	0.00124468	3.18381e-06	0.00214226	0.00135313	0.00133524	0.00235895	0.000138859	2.09697e-05	0.000460764	0.00133845	0.000770783	0.000411414	0.00106411	0.00143483	1.25506e-05	0.00147864	0.000419201	0.0003941	0.000687665	0.000411224	0.00100525	0.000524067	9.26813e-05	0.000173722	2.49767e-05	3.54251e-05	0.000422702	0.000376526	1.10149e-05	4.05295e-06	0.000604616	1.65142e-05	6.61292e-05	6.09872e-05	0.000428336
10.9805	4.11105e-05	5.35783e-06	0.000180209	6.16658e-05	2.4319e-05	6.02691e-06	1.63699e-05	9.86421e-05	1.98973e-05	1.34508e-05	0.000184368	0.000840739	0.0056691	0.00155433	0.00129215	3.39598e-06	0.00220189	0.00139686	0.00138219	0.00242665	0.000145307	2.22711e-05	0.000478136	0.00138362	0.000798265	0.000429068	0.00110006	0.00148162	1.3341e-05	0.00152628	0.000435584	0.00040962	0.000712738	0.000427727	0.00104133	0.000543819	9.77825e-05	0.000181602	2.63955e-05	3.74279e-05	0.000439503	0.000392722	1.16969e-05	4.31359e-06	0.00062804	1.74618e-05	6.94971e-05	6.40192e-05	0.000446361
11.0103	4.33166e-05	5.7115e-06	0.000188932	6.48972e-05	2.56741e-05	6.38031e-06	1.73627e-05	0.000103448	2.10465e-05	1.42471e-05	0.000193204	0.000872176	0.0058096	0.00161055	0.00134124	3.62161e-06	0.00226299	0.00144185	0.0014306	0.00249599	0.000152032	2.36491e-05	0.000496099	0.00143014	0.000826613	0.000447419	0.00113711	0.00152974	1.41788e-05	0.00157528	0.000452554	0.000425696	0.000738647	0.000444844	0.00107857	0.000564248	0.000103145	0.000189813	2.78897e-05	3.95371e-05	0.000456909	0.000409567	1.24191e-05	4.59021e-06	0.000652294	1.84609e-05	7.30261e-05	6.71926e-05	0.000465076
11.0401	4.5634e-05	6.08733e-06	0.000198047	6.82871e-05	2.71005e-05	6.75349e-06	1.84124e-05	0.000108471	2.22585e-05	1.5088e-05	0.000202435	0.000904689	0.00595295	0.00166861	0.00139199	3.86152e-06	0.0023256	0.00148812	0.00148052	0.00256703	0.000159047	2.51081e-05	0.000514671	0.00147804	0.00085585	0.000466495	0.00117529	0.00157921	1.50666e-05	0.00162567	0.000470132	0.000442348	0.000765418	0.000462596	0.001117	0.000585373	0.000108782	0.000198365	2.94631e-05	4.1758e-05	0.000474939	0.000427085	1.31837e-05	4.88374e-06	0.000677403	1.95141e-05	7.67234e-05	7.05134e-05	0.000484504
11.07	4.80679e-05	6.48662e-06	0.000207572	7.18427e-05	2.86018e-05	7.1475e-06	1.95218e-05	0.000113723	2.35363e-05	1.59759e-05	0.000212078	0.000938312	0.00609919	0.00172858	0.00144447	4.11656e-06	0.00238973	0.00153571	0.00153199	0.00263978	0.000166362	2.66525e-05	0.000533869	0.00152736	0.000885999	0.000486319	0.00121463	0.00163007	1.60071e-05	0.00167749	0.000488336	0.000459594	0.000793078	0.000481003	0.00115666	0.000607217	0.000114706	0.000207273	3.11196e-05	4.40962e-05	0.000493613	0.0004453	1.3993e-05	5.19516e-06	0.000703396	2.0624e-05	8.05963e-05	7.39881e-05	0.00050467
11.0998	5.06236e-05	6.91077e-06	0.000217521	7.55714e-05	3.01815e-05	7.56345e-06	2.06943e-05	0.000119211	2.48834e-05	1.69132e-05	0.00022215	0.00097308	0.00624837	0.00179051	0.00149872	4.38765e-06	0.00245544	0.00158465	0.00158505	0.00271428	0.000173989	2.8287e-05	0.000553712	0.00157814	0.000917086	0.00050692	0.00125516	0.00168235	1.70034e-05	0.00173076	0.000507186	0.000477453	0.000821652	0.000500089	0.00119758	0.0006298	0.000120929	0.000216549	3.28631e-05	4.65573e-05	0.000512951	0.000464239	1.48496e-05	5.52549e-06	0.000730299	2.17937e-05	8.46527e-05	7.76232e-05	0.000525599
11.1296	5.3307e-05	7.36122e-06	0.000227914	7.94809e-05	3.18435e-05	8.0025e-06	2.19332e-05	0.000124945	2.63032e-05	1.79025e-05	0.000232667	0.00100903	0.00640054	0.00185447	0.00155479	4.67575e-06	0.00252275	0.00163498	0.00163975	0.00279058	0.000181941	3.00167e-05	0.000574219	0.00163041	0.000949136	0.000528324	0.00129691	0.00173609	1.80586e-05	0.00178554	0.000526704	0.000495944	0.000851168	0.000519876	0.00123979	0.000653145	0.000127467	0.000226207	3.46979e-05	4.91475e-05	0.000532974	0.000483928	1.57559e-05	5.87583e-06	0.000758142	2.30261e-05	8.89007e-05	8.14255e-05	0.000547317
11.1594	5.61238e-05	7.83952e-06	0.000238768	8.35796e-05	3.3592e-05	8.46588e-06	2.3242e-05	0.000130937	2.77996e-05	1.89466e-05	0.000243649	0.00104619	0.00655575	0.00192051	0.00161273	4.98185e-06	0.00259169	0.00168672	0.00169614	0.0028687	0.000190231	3.18467e-05	0.000595411	0.00168422	0.000982174	0.00055056	0.00133992	0.00179132	1.91759e-05	0.00184186	0.000546912	0.000515087	0.000881655	0.000540387	0.00128334	0.000677275	0.000134334	0.000236262	3.66285e-05	5.1873e-05	0.000553703	0.000504394	1.67148e-05	6.24732e-06	0.000786953	2.43243e-05	9.33485e-05	8.54023e-05	0.00056985
11.1892	5.90803e-05	8.34729e-06	0.000250101	8.78756e-05	3.54309e-05	8.95485e-06	2.46244e-05	0.000137196	2.93763e-05	2.00484e-05	0.000255113	0.00108461	0.00671405	0.00198869	0.00167261	5.30704e-06	0.00266231	0.00173992	0.00175425	0.00294869	0.000198871	3.37825e-05	0.000617307	0.00173961	0.00101623	0.000573658	0.00138422	0.00184808	2.03589e-05	0.00189974	0.000567831	0.000534904	0.00091314	0.000561647	0.00132825	0.000702213	0.000141544	0.000246728	3.86595e-05	5.47404e-05	0.00057516	0.000525665	1.7729e-05	6.64116e-06	0.000816763	2.56917e-05	9.8005e-05	8.95608e-05	0.000593225
11.219	6.21829e-05	8.88624e-06	0.000261934	9.23779e-05	3.73649e-05	9.47077e-06	2.60841e-05	0.000143733	3.10373e-05	2.12107e-05	0.000267081	0.00112433	0.0068755	0.00205908	0.00173447	5.65245e-06	0.00273464	0.00179461	0.00181413	0.00303057	0.000207877	3.58301e-05	0.000639929	0.0017966	0.00105132	0.000597648	0.00142985	0.0019064	2.16111e-05	0.00195924	0.000589483	0.000555414	0.000945655	0.000583679	0.00137456	0.000727983	0.000149113	0.000257621	4.07956e-05	5.77566e-05	0.000597368	0.000547772	1.88017e-05	7.05864e-06	0.000847604	2.71317e-05	0.000102879	9.39087e-05	0.000617472
11.2488	6.54384e-05	9.45818e-06	0.000274286	9.70956e-05	3.93984e-05	1.0015e-05	2.76254e-05	0.000150561	3.2787e-05	2.24367e-05	0.000279572	0.00116537	0.00704014	0.00213175	0.00179839	6.01926e-06	0.00280872	0.00185083	0.00187585	0.0031144	0.000217261	3.79953e-05	0.000663297	0.00185526	0.00108748	0.000622562	0.00147684	0.00196633	2.29363e-05	0.00202039	0.000611894	0.000576642	0.000979229	0.00060651	0.00142232	0.00075461	0.000157059	0.000268956	4.3042e-05	6.09287e-05	0.000620349	0.000570742	1.9936e-05	7.50108e-06	0.000879506	2.86479e-05	0.000107981	9.84542e-05	0.000642618
11.2786	6.88536e-05	1.0065e-05	0.000287178	0.000102038	4.15362e-05	1.05892e-05	2.92524e-05	0.00015769	3.46298e-05	2.37297e-05	0.000292607	0.0012078	0.00720804	0.00220677	0.00186441	6.40874e-06	0.00288459	0.00190861	0.00193943	0.0032002	0.000227039	4.02847e-05	0.000687434	0.00191562	0.00112474	0.000648431	0.00152523	0.00202789	2.43387e-05	0.00208324	0.000635087	0.000598607	0.00101389	0.000630166	0.00147155	0.000782118	0.000165397	0.00028075	4.54038e-05	6.42642e-05	0.000644128	0.000594609	2.11352e-05	7.9699e-06	0.000912502	3.02441e-05	0.000113319	0.000103205	0.000668694
11.3084	7.2436e-05	1.07087e-05	0.000300631	0.000107215	4.37834e-05	1.11947e-05	3.09696e-05	0.000165133	3.65702e-05	2.50932e-05	0.000306208	0.00125164	0.00737925	0.0022842	0.00193261	6.82221e-06	0.00296228	0.00196799	0.00200495	0.00328803	0.000237227	4.27049e-05	0.000712363	0.00197773	0.00116312	0.000675288	0.00157506	0.00209114	2.58224e-05	0.00214781	0.000659086	0.000621335	0.00104968	0.000654674	0.00152231	0.000810534	0.000174145	0.000293019	4.78865e-05	6.77711e-05	0.000668729	0.000619404	2.24027e-05	8.46658e-06	0.000946627	3.19243e-05	0.000118905	0.000108171	0.000695731
11.3382	7.6193e-05	1.13915e-05	0.000314669	0.000112638	4.61453e-05	1.18332e-05	3.27816e-05	0.000172903	3.86131e-05	2.65308e-05	0.000320397	0.00129695	0.00755383	0.00236412	0.00200304	7.26109e-06	0.00304184	0.00202902	0.00207244	0.00337791	0.000247841	4.5263e-05	0.000738106	0.00204163	0.00120266	0.00070317	0.00162637	0.00215611	2.73919e-05	0.00221417	0.000683918	0.000644848	0.00108662	0.000680061	0.00157462	0.000839884	0.000183323	0.000305781	5.04958e-05	7.14574e-05	0.000694176	0.00064516	2.37424e-05	8.99269e-06	0.000981915	3.36926e-05	0.000124749	0.000113359	0.000723761
11.368	8.01326e-05	1.21154e-05	0.000329313	0.000118316	4.86272e-05	1.25065e-05	3.46933e-05	0.000181013	4.07637e-05	2.80463e-05	0.000335199	0.00134376	0.00773184	0.0024466	0.00207576	7.72685e-06	0.00312331	0.00209174	0.00214197	0.0034699	0.000258897	4.79665e-05	0.000764688	0.00210736	0.00124339	0.00073211	0.00167919	0.00222284	2.90519e-05	0.00228234	0.000709608	0.000669172	0.00112475	0.000706357	0.00162853	0.000870195	0.000192948	0.000319053	5.32378e-05	7.53318e-05	0.000720497	0.000671911	2.5158e-05	9.54988e-06	0.0010184	3.55534e-05	0.000130862	0.000118781	0.000752815
11.3978	8.4263e-05	1.2883e-05	0.000344587	0.00012426	5.12349e-05	1.32163e-05	3.67098e-05	0.000189477	4.30273e-05	2.96435e-05	0.000350638	0.00139213	0.00791334	0.00253173	0.00215086	8.22107e-06	0.00320673	0.00215618	0.0022136	0.00356404	0.000270412	5.08232e-05	0.000792132	0.00217498	0.00128533	0.000762145	0.00173358	0.00229139	3.08073e-05	0.00235238	0.000736185	0.000694331	0.00116411	0.000733591	0.00168409	0.000901495	0.000203042	0.000332855	5.61185e-05	7.9403e-05	0.000747716	0.000699693	2.66535e-05	1.01399e-05	0.00105612	3.7511e-05	0.000137255	0.000124444	0.000782929
11.4276	8.85928e-05	1.36966e-05	0.000360517	0.000130483	5.39744e-05	1.39645e-05	3.88365e-05	0.000198308	4.54093e-05	3.13268e-05	0.000366738	0.0014421	0.0080984	0.00261958	0.00222839	8.74539e-06	0.00329215	0.00222239	0.00228737	0.00366037	0.000282405	5.38412e-05	0.000820465	0.00224454	0.00132852	0.000793313	0.00178957	0.00236178	3.26632e-05	0.00242433	0.000763676	0.000720352	0.00120472	0.000761792	0.00174132	0.000933813	0.000213624	0.000347206	5.91445e-05	8.36805e-05	0.000775861	0.000728541	2.82333e-05	1.07645e-05	0.00109512	3.95704e-05	0.00014394	0.000130359	0.000814136
11.4574	9.3131e-05	1.45589e-05	0.000377128	0.000136997	5.6852e-05	1.47532e-05	4.10789e-05	0.000207523	4.79156e-05	3.31005e-05	0.000383526	0.00149372	0.00828709	0.00271024	0.00230843	9.30156e-06	0.00337961	0.00229041	0.00236336	0.00375894	0.000294893	5.70292e-05	0.000849712	0.00231609	0.001373	0.000825653	0.00184721	0.00243408	3.46252e-05	0.00249823	0.000792111	0.000747262	0.00124664	0.000790993	0.00180029	0.000967178	0.000224716	0.000362125	6.23226e-05	8.8174e-05	0.00080496	0.000758494	2.99018e-05	1.14256e-05	0.00113542	4.17364e-05	0.00015093	0.000136537	0.000846472
11.4872	9.78867e-05	1.54726e-05	0.000394446	0.000143813	5.98741e-05	1.55842e-05	4.3443e-05	0.000217135	5.05523e-05	3.4969e-05	0.00040103	0.00154704	0.00847948	0.00280379	0.00239106	9.89143e-06	0.00346916	0.0023603	0.00244161	0.0038598	0.000307898	6.03963e-05	0.000879901	0.00238967	0.00141878	0.000859206	0.00190653	0.00250832	3.66989e-05	0.00257415	0.000821518	0.000775087	0.00128988	0.000821225	0.00186103	0.00100162	0.000236342	0.000377632	6.56597e-05	9.28935e-05	0.00083504	0.000789589	3.16636e-05	1.21253e-05	0.00117708	4.40142e-05	0.000158238	0.000142988	0.000879975
11.517	0.00010287	1.64406e-05	0.000412498	0.000150944	6.30476e-05	1.646e-05	4.59349e-05	0.000227162	5.33258e-05	3.69373e-05	0.000419276	0.00160213	0.00867563	0.00290032	0.00247634	1.05169e-05	0.00356084	0.00243209	0.00252221	0.003963	0.000321438	6.39518e-05	0.000911057	0.00246536	0.00146592	0.000894011	0.00196759	0.00258455	3.88904e-05	0.00265212	0.000851928	0.000803856	0.0013345	0.000852522	0.00192359	0.00103717	0.000248523	0.00039375	6.91633e-05	9.78497e-05	0.000866133	0.000821866	3.35236e-05	1.28657e-05	0.00122012	4.64092e-05	0.000165876	0.000149724	0.000914682
11.5468	0.00010809	1.74659e-05	0.000431314	0.000158405	6.63795e-05	1.73827e-05	4.8561e-05	0.000237619	5.62426e-05	3.90103e-05	0.000438294	0.00165902	0.00887563	0.00299991	0.00256436	1.11801e-05	0.0036547	0.00250584	0.0026052	0.00406857	0.000335534	6.7706e-05	0.000943211	0.00254319	0.00151445	0.000930113	0.00203044	0.00266284	4.1206e-05	0.00273221	0.000883374	0.0008336	0.00138053	0.000884916	0.00198801	0.00107386	0.000261284	0.000410498	7.28408e-05	0.000103054	0.000898267	0.000855367	3.54871e-05	1.3649e-05	0.0012646	4.89271e-05	0.000173859	0.000156755	0.000950633
11.5766	0.000113558	1.85518e-05	0.000450921	0.000166209	6.98773e-05	1.83546e-05	5.1328e-05	0.000248523	5.93097e-05	4.11933e-05	0.000458115	0.00171779	0.00907955	0.00310267	0.00265519	1.18832e-05	0.00375081	0.00258159	0.00269067	0.00417659	0.000350209	7.16691e-05	0.00097639	0.00262322	0.00156439	0.000967554	0.00209512	0.00274322	4.36522e-05	0.00281445	0.000915887	0.000864347	0.00142801	0.000918443	0.00205434	0.00111172	0.00027465	0.000427901	7.67004e-05	0.000108517	0.000931473	0.000890133	3.75593e-05	1.44775e-05	0.00131056	5.15737e-05	0.000182202	0.000164094	0.000987867
11.6064	0.000119285	1.97016e-05	0.00047135	0.00017437	7.35487e-05	1.93784e-05	5.4243e-05	0.000259893	6.25344e-05	4.34918e-05	0.000478769	0.00177847	0.00928747	0.0032087	0.00274893	1.26284e-05	0.0038492	0.0026594	0.00277868	0.0042871	0.000365484	7.58523e-05	0.00101063	0.00270553	0.0016158	0.00100638	0.00216168	0.00282576	4.62362e-05	0.00289891	0.000949501	0.000896129	0.00147698	0.000953139	0.00212264	0.00115078	0.000288648	0.000445981	8.07504e-05	0.000114251	0.000965783	0.000926209	3.9746e-05	1.53537e-05	0.00135804	5.43552e-05	0.000190918	0.000171753	0.00102643
11.6362	0.000125282	2.09188e-05	0.000492631	0.000182904	7.74018e-05	2.04567e-05	5.73133e-05	0.000271747	6.59243e-05	4.59115e-05	0.000500288	0.00184115	0.00949947	0.00331808	0.00284565	1.34182e-05	0.00394994	0.00273931	0.0028693	0.00440015	0.000381384	8.02671e-05	0.00104595	0.00279016	0.0016687	0.00104664	0.00223017	0.00291051	4.89653e-05	0.00298565	0.000984251	0.000928979	0.00152749	0.00098904	0.00219294	0.00119109	0.000303304	0.000464762	8.49992e-05	0.000120269	0.00100123	0.000963637	4.20531e-05	1.62802e-05	0.00140708	5.7278e-05	0.000200025	0.000179746	0.00106635
11.666	0.000131561	2.22072e-05	0.000514798	0.000191826	8.1445e-05	2.15922e-05	6.05466e-05	0.000284103	6.94873e-05	4.84584e-05	0.000522707	0.00190587	0.00971566	0.00343093	0.00294544	1.4255e-05	0.00405307	0.0028214	0.00296261	0.0045158	0.000397932	8.49257e-05	0.00108239	0.00287719	0.00172314	0.00108838	0.00230066	0.00299753	5.18471e-05	0.00307472	0.00102017	0.000962929	0.00157958	0.00102618	0.00226531	0.00123267	0.000318646	0.000484269	8.94561e-05	0.000126584	0.00103785	0.00100247	4.44867e-05	1.72597e-05	0.00145774	6.0349e-05	0.000209537	0.000188085	0.00110769
11.6958	0.000138133	2.35708e-05	0.000537884	0.000201153	8.56872e-05	2.27877e-05	6.3951e-05	0.000296982	7.32317e-05	5.11389e-05	0.000546059	0.00197271	0.00993611	0.00354735	0.0030484	1.51417e-05	0.00415866	0.0029057	0.00305869	0.00463412	0.000415154	8.98408e-05	0.00111999	0.00296667	0.00177917	0.00113165	0.00237318	0.00308688	5.48897e-05	0.00316618	0.0010573	0.000998014	0.0016333	0.00106461	0.00233979	0.00127556	0.000334704	0.000504527	9.41303e-05	0.000133209	0.00107567	0.00104274	4.70535e-05	1.8295e-05	0.00151006	6.3575e-05	0.000219471	0.000196784	0.00115049
11.7256	0.000145013	2.50135e-05	0.000561921	0.0002109	9.01375e-05	2.40464e-05	6.75349e-05	0.000310405	7.71661e-05	5.39597e-05	0.00057038	0.00204172	0.0101609	0.00366746	0.00315462	1.6081e-05	0.00426677	0.00299228	0.00315762	0.00475516	0.000433076	9.50259e-05	0.00115877	0.00305867	0.00183681	0.0011765	0.0024478	0.00317862	5.81018e-05	0.0032601	0.00109568	0.00103427	0.00168868	0.00110436	0.00241643	0.00131979	0.000351509	0.000525563	9.90316e-05	0.000140158	0.00111473	0.00108451	4.97601e-05	1.93892e-05	0.00156409	6.69634e-05	0.000229845	0.000205857	0.00119479
11.7554	0.000152213	2.65399e-05	0.000586946	0.000221087	9.48055e-05	2.53714e-05	7.1307e-05	0.000324392	8.12996e-05	5.69275e-05	0.000595708	0.00211298	0.0103902	0.00379137	0.0032642	1.7076e-05	0.00437746	0.0030812	0.00325948	0.00487898	0.000451727	0.000100495	0.00119877	0.00315327	0.00189613	0.00122298	0.00252457	0.00327282	6.14921e-05	0.00335653	0.00113533	0.00107173	0.00174579	0.00114547	0.00249529	0.00136541	0.00036909	0.000547404	0.00010417	0.000147447	0.00115506	0.00112783	5.26138e-05	2.05454e-05	0.00161988	7.05219e-05	0.000240677	0.00021532	0.00124064
11.7852	0.000159746	2.81545e-05	0.000612996	0.000231729	9.97012e-05	2.6766e-05	7.52766e-05	0.000338966	8.56416e-05	6.00497e-05	0.000622081	0.00218656	0.010624	0.00391919	0.00337724	1.81298e-05	0.00449078	0.00317253	0.00336436	0.00500566	0.000471134	0.000106263	0.00124003	0.00325054	0.00195715	0.00127116	0.00260356	0.00336956	6.50702e-05	0.00345555	0.00117632	0.00111043	0.00180466	0.00118799	0.00257643	0.00141245	0.000387482	0.000570078	0.000109557	0.000155091	0.00119671	0.00117274	5.56221e-05	2.17668e-05	0.00167748	7.42584e-05	0.000251985	0.000225188	0.0012881
11.815	0.000167628	2.9862e-05	0.000640107	0.000242848	0.000104835	2.82337e-05	7.94533e-05	0.00035415	9.02019e-05	6.33339e-05	0.000649539	0.00226253	0.0108626	0.00405106	0.00349384	1.92457e-05	0.00460682	0.00326632	0.00347235	0.00513526	0.000491327	0.000112345	0.00128258	0.00335055	0.00201994	0.00132108	0.00268483	0.00346889	6.88458e-05	0.00355723	0.00121867	0.00115042	0.00186535	0.00123196	0.0026599	0.00146096	0.000406717	0.000593614	0.000115202	0.000163106	0.00123971	0.00121931	5.87928e-05	2.30571e-05	0.00173695	7.81813e-05	0.000263789	0.000235477	0.00133721
11.8448	0.000175873	3.16675e-05	0.000668318	0.000254461	0.000110218	2.97781e-05	8.38471e-05	0.000369968	9.4991e-05	6.6788e-05	0.000678123	0.00234097	0.0111059	0.0041871	0.00361411	2.04273e-05	0.00472564	0.00336264	0.00358355	0.00526784	0.000512338	0.000118757	0.00132648	0.00345338	0.00208454	0.0013728	0.00276843	0.0035709	7.28294e-05	0.00366163	0.00126243	0.00119174	0.00192791	0.00127742	0.00274575	0.00151096	0.000426832	0.000618041	0.000121118	0.000171508	0.00128411	0.00126758	6.21341e-05	2.44196e-05	0.00179834	8.22993e-05	0.000276109	0.000246203	0.00138802
11.8747	0.000184497	3.35763e-05	0.00069767	0.00026659	0.000115861	3.14031e-05	8.84685e-05	0.000386445	0.000100019	7.04203e-05	0.000707876	0.00242196	0.0113541	0.00432744	0.00373816	2.16783e-05	0.00484731	0.00346157	0.00369804	0.00540349	0.000534199	0.000125517	0.00137174	0.00355911	0.00215099	0.00142639	0.00285443	0.00367567	7.70319e-05	0.00376883	0.00130764	0.00123442	0.00199239	0.00132442	0.00283406	0.00156252	0.000447862	0.000643391	0.000127316	0.000180316	0.00132993	0.00131761	6.56546e-05	2.58584e-05	0.00186172	8.66214e-05	0.000288966	0.000257383	0.0014406
11.9045	0.000193515	3.55941e-05	0.000728204	0.000279254	0.000121777	3.31127e-05	9.33284e-05	0.000403606	0.000105299	7.42395e-05	0.000738841	0.00250557	0.0116074	0.00447222	0.00386612	2.30027e-05	0.0049719	0.00356318	0.00381594	0.00554228	0.000556943	0.000132643	0.00141843	0.00366783	0.00221937	0.0014819	0.0029429	0.00378327	8.14648e-05	0.00387891	0.00135435	0.0012785	0.00205884	0.00137301	0.00292486	0.00161566	0.000469846	0.000669696	0.000133808	0.000189547	0.00137722	0.00136946	6.93633e-05	2.73774e-05	0.00192713	9.11572e-05	0.00030238	0.000269036	0.00149499
11.9343	0.000202944	3.77267e-05	0.000759961	0.000292477	0.000127977	3.49111e-05	9.84384e-05	0.000421479	0.00011084	7.82548e-05	0.000771065	0.0025919	0.0118659	0.00462158	0.0039981	2.44046e-05	0.0050995	0.00366754	0.00393735	0.00568429	0.000580607	0.000140153	0.00146657	0.00377962	0.00228971	0.00153941	0.00303391	0.00389379	8.61399e-05	0.00399195	0.00140261	0.00132405	0.00212732	0.00142323	0.00301824	0.00167043	0.000492822	0.000696988	0.000140609	0.00019922	0.00142604	0.0014232	7.32696e-05	2.89807e-05	0.00199464	9.59166e-05	0.000316375	0.000281178	0.00155126
11.9641	0.000212803	3.99802e-05	0.000792986	0.00030628	0.000134475	3.68027e-05	0.00010381	0.000440091	0.000116656	8.24757e-05	0.000804595	0.00268102	0.0121297	0.00477567	0.00413422	2.58885e-05	0.00523017	0.00377473	0.00406237	0.0058296	0.000605227	0.000148067	0.00151623	0.00389457	0.00236208	0.00159897	0.00312753	0.00400732	9.10702e-05	0.00410803	0.00145247	0.00137109	0.00219789	0.00147514	0.00311425	0.00172689	0.000516832	0.000725302	0.00014773	0.000209355	0.00147641	0.00147887	7.73834e-05	3.06729e-05	0.00206431	0.00010091	0.000330974	0.000293831	0.00160946
11.9939	0.000223108	4.23612e-05	0.000827324	0.000320686	0.000141284	3.8792e-05	0.000109457	0.000459471	0.00012276	8.69122e-05	0.000839481	0.00277304	0.012399	0.00493464	0.00427463	2.7459e-05	0.00536402	0.00388484	0.00419113	0.0059783	0.000630841	0.000156407	0.00156743	0.00401278	0.00243654	0.00166066	0.00322384	0.00412396	9.62687e-05	0.00422724	0.00150396	0.00141969	0.00227061	0.00152878	0.00321296	0.00178507	0.000541917	0.000754672	0.000155186	0.000219973	0.00152839	0.00153655	8.17151e-05	3.24584e-05	0.0021362	0.000106147	0.0003462	0.000307012	0.00166966
12.0237	0.000233878	4.48764e-05	0.000863021	0.000335721	0.000148418	4.0884e-05	0.000115391	0.000479649	0.000129165	9.15748e-05	0.000875772	0.00286804	0.0126739	0.00509866	0.00441944	2.9121e-05	0.00550112	0.00399795	0.00432374	0.00613048	0.000657491	0.000165193	0.00162024	0.00413435	0.00251314	0.00172454	0.0033229	0.00424381	0.00010175	0.00434966	0.00155716	0.00146988	0.00234553	0.00158421	0.00331442	0.00184502	0.000568121	0.000785135	0.000162993	0.000231095	0.00158202	0.00159629	8.62753e-05	3.43421e-05	0.00221039	0.000111641	0.000362079	0.000320743	0.00173192
12.0535	0.000245134	4.7533e-05	0.000900125	0.000351409	0.000155892	4.30836e-05	0.000121626	0.000500658	0.000135884	9.64744e-05	0.000913523	0.00296612	0.0129546	0.00526788	0.0045688	3.08798e-05	0.00564156	0.00411415	0.00446033	0.00628624	0.000685218	0.000174449	0.0016747	0.00425938	0.00259196	0.00179069	0.0034248	0.00436697	0.000107527	0.0044754	0.0016121	0.00152173	0.00242271	0.00164149	0.00341872	0.00190679	0.00059549	0.000816727	0.000171163	0.000242744	0.00163736	0.00165818	9.10754e-05	3.63291e-05	0.00228694	0.000117402	0.000378636	0.000335045	0.00179631
12.0833	0.000256895	5.03386e-05	0.000938685	0.000367775	0.000163721	4.53962e-05	0.000128176	0.000522529	0.000142933	0.000101623	0.000952788	0.00306739	0.0132413	0.00544249	0.00472287	3.27409e-05	0.00578544	0.00423353	0.00460102	0.00644567	0.000714068	0.000184198	0.00173087	0.00438797	0.00267307	0.00185919	0.00352963	0.00449355	0.000113618	0.00460455	0.00166885	0.00157528	0.00250223	0.00170066	0.00352591	0.00197044	0.00062407	0.000849489	0.000179715	0.000254943	0.00169445	0.00172227	9.61272e-05	3.84247e-05	0.00236591	0.000123443	0.000395898	0.000349939	0.00186288
12.1131	0.000269182	5.33009e-05	0.000978752	0.000384848	0.00017192	4.78273e-05	0.000135057	0.000545296	0.000150326	0.000107031	0.000993623	0.00317194	0.0135341	0.00562265	0.00488178	3.47101e-05	0.00593287	0.00435619	0.00474595	0.00660888	0.000744085	0.000194467	0.0017888	0.00452024	0.00275653	0.00193012	0.00363745	0.00462366	0.000120037	0.00473722	0.00172747	0.0016306	0.00258415	0.00176179	0.00363607	0.00203601	0.000653911	0.000883459	0.000188663	0.000267716	0.00175334	0.00178863	0.000101443	4.06344e-05	0.00244738	0.000129776	0.000413893	0.000365448	0.00193172
12.1429	0.000282016	5.64284e-05	0.00102038	0.000402655	0.000180508	5.03827e-05	0.000142284	0.000568996	0.00015808	0.000112713	0.00103609	0.0032799	0.0138333	0.00580856	0.00504571	3.67936e-05	0.00608393	0.00448224	0.00489526	0.00677599	0.00077532	0.000205281	0.00184855	0.0046563	0.00284242	0.00200355	0.00374837	0.00475743	0.000126801	0.0048735	0.001788	0.00168775	0.00266853	0.00182494	0.00374928	0.00210356	0.000685062	0.000918679	0.000198026	0.000281089	0.00181409	0.00185735	0.000107036	4.29641e-05	0.00253143	0.000136415	0.000432649	0.000381596	0.0020029
12.1727	0.000295422	5.97297e-05	0.00106362	0.000421224	0.000189501	5.30685e-05	0.000149872	0.000593664	0.000166211	0.000118681	0.00108024	0.00339137	0.0141391	0.00600041	0.00521481	3.89981e-05	0.00623875	0.00461178	0.0050491	0.00694709	0.000807822	0.000216669	0.00191019	0.00479628	0.00293083	0.00207957	0.00386246	0.00489498	0.00013393	0.00501352	0.00185052	0.00174678	0.00275544	0.00189015	0.0038656	0.00217315	0.000717576	0.000955191	0.00020782	0.000295088	0.00187675	0.00192849	0.000112919	4.54198e-05	0.00261813	0.000143373	0.000452195	0.000398407	0.00207648
12.2025	0.000309422	6.3214e-05	0.00110852	0.000440587	0.000198916	5.58911e-05	0.000157839	0.000619339	0.000174736	0.000124949	0.00112615	0.00350647	0.0144516	0.00619839	0.00538926	4.13305e-05	0.00639742	0.00474493	0.00520763	0.00712232	0.000841647	0.00022866	0.00197376	0.0049403	0.00302182	0.00215828	0.00397984	0.00503645	0.00014144	0.00515738	0.00191509	0.00180776	0.00284496	0.00195751	0.00398511	0.00224483	0.000751508	0.000993039	0.000218065	0.000309741	0.00194138	0.00200213	0.000119107	4.8008e-05	0.00270755	0.000150665	0.000472563	0.000415907	0.00215254
12.2323	0.00032404	6.68909e-05	0.00115515	0.000460774	0.000208774	5.88572e-05	0.000166203	0.000646061	0.000183674	0.000131532	0.00117388	0.00362533	0.0147711	0.00640272	0.00556923	4.37981e-05	0.00656008	0.00488181	0.00537099	0.00730179	0.00087685	0.000241284	0.00203935	0.0050885	0.0031155	0.00223975	0.00410058	0.00518199	0.000149354	0.00530521	0.00198177	0.00187077	0.00293716	0.00202706	0.0041079	0.00231866	0.000786913	0.00103227	0.000228779	0.000325077	0.00200804	0.00207836	0.000125615	5.07352e-05	0.00279979	0.000158307	0.000493785	0.00043412	0.00223117
12.2621	0.000339302	7.07703e-05	0.00120357	0.000481818	0.000219094	6.19737e-05	0.000174981	0.000673871	0.000193043	0.000138444	0.0012235	0.00374807	0.0150979	0.00661362	0.00575492	4.64088e-05	0.00672685	0.00502254	0.00553937	0.00748565	0.000913492	0.000254576	0.00210702	0.00524101	0.00321195	0.00232409	0.0042248	0.00533173	0.000157691	0.00545714	0.00205063	0.00193586	0.00303211	0.00209888	0.00423403	0.0023947	0.000823849	0.00107293	0.000239982	0.000341125	0.00207679	0.00215726	0.000132457	5.36085e-05	0.00289492	0.000166313	0.000515892	0.000453075	0.00231244
12.2919	0.000355235	7.4863e-05	0.00125382	0.000503751	0.000229897	6.52479e-05	0.000184194	0.000702814	0.000202863	0.000145702	0.00127507	0.00387483	0.0154322	0.00683131	0.00594652	4.9171e-05	0.00689785	0.00516725	0.00571294	0.00767403	0.000951633	0.000268567	0.00217683	0.00539798	0.00331126	0.0024114	0.0043526	0.00548584	0.000166473	0.00561329	0.00212174	0.00200312	0.00312989	0.00217303	0.0043636	0.00247302	0.000862377	0.00111506	0.000251696	0.000357916	0.00214769	0.00223891	0.00013965	5.66351e-05	0.00299303	0.000174699	0.000538919	0.000472798	0.00239644
12.3217	0.000371864	7.91799e-05	0.00130598	0.000526609	0.000241204	6.86876e-05	0.000193861	0.000732934	0.000213155	0.000153322	0.00132868	0.00400574	0.0157743	0.00705602	0.00614423	5.20935e-05	0.00707321	0.00531608	0.00589188	0.00786707	0.000991342	0.000283295	0.00224888	0.00555955	0.00341354	0.00250177	0.00448408	0.00564449	0.000175723	0.00577382	0.00219518	0.00207262	0.00323058	0.00224959	0.00449669	0.00255367	0.00090256	0.00115873	0.000263941	0.000375484	0.00222081	0.0023234	0.000147212	5.98228e-05	0.00309421	0.000183484	0.000562901	0.00049332	0.00248325
12.3515	0.00038922	8.37327e-05	0.00136011	0.000550428	0.000253037	7.23008e-05	0.000204002	0.00076428	0.000223941	0.000161322	0.0013844	0.00414095	0.0161244	0.00728801	0.00634826	5.51857e-05	0.00725309	0.00546917	0.00607638	0.00806493	0.00103269	0.000298797	0.00232323	0.0057259	0.0035189	0.00259531	0.00461937	0.00580785	0.000185466	0.00593886	0.00227101	0.00214444	0.00333427	0.00232862	0.00463338	0.00263673	0.00094446	0.00120397	0.00027674	0.000393862	0.00229622	0.00241082	0.000155158	6.31796e-05	0.00319855	0.000192685	0.000587874	0.00051467	0.00257296
12.3813	0.000407331	8.85337e-05	0.00141627	0.000575244	0.00026542	7.60958e-05	0.000214641	0.000796899	0.000235242	0.00016972	0.0014423	0.00428062	0.0164829	0.00752753	0.00655885	5.84577e-05	0.00743762	0.00562669	0.00626664	0.00826776	0.00107574	0.000315113	0.00239998	0.00589717	0.00362745	0.00269214	0.00475857	0.0059761	0.000195728	0.00610856	0.00234933	0.00221868	0.00344104	0.00241019	0.00477377	0.00272227	0.000988146	0.00125085	0.000290117	0.000413085	0.00237399	0.00250127	0.000163509	6.67137e-05	0.00330614	0.000202319	0.000613876	0.00053688	0.00266567
12.4111	0.000426228	9.35955e-05	0.00147453	0.000601096	0.000278378	8.00816e-05	0.000225799	0.000830844	0.000247083	0.000178534	0.00150248	0.0044249	0.0168501	0.00777484	0.00677622	6.192e-05	0.00762696	0.00578879	0.00646288	0.00847575	0.00112058	0.000332285	0.0024792	0.00607356	0.0037393	0.00279237	0.00490181	0.00614944	0.000206535	0.00628309	0.0024302	0.00229541	0.00355098	0.00249439	0.00491795	0.00281035	0.00103369	0.00129941	0.000304096	0.000433191	0.00245418	0.00259484	0.000172282	7.04339e-05	0.00341708	0.000212407	0.000640946	0.00055998	0.00276146
12.4409	0.000445942	9.89316e-05	0.00153496	0.000628025	0.000291936	8.42673e-05	0.000237501	0.000866168	0.000259487	0.000187786	0.00156502	0.00457395	0.0172263	0.00803022	0.00700061	6.55839e-05	0.00782127	0.00595564	0.0066653	0.00868905	0.00116729	0.000350356	0.00256099	0.00625523	0.00385458	0.00289612	0.00504922	0.00632808	0.000217915	0.00646261	0.00251371	0.00237473	0.00366419	0.00258128	0.00506601	0.00290105	0.00108115	0.00134972	0.000318703	0.000454218	0.00253688	0.00269165	0.000181499	7.43494e-05	0.00353148	0.000222969	0.000669124	0.000584006	0.00286043
12.4707	0.000466507	0.000104556	0.00159763	0.000656071	0.000306121	8.86626e-05	0.000249771	0.000902927	0.000272482	0.000197496	0.00163	0.00472795	0.0176118	0.00829397	0.00723227	6.94617e-05	0.00802071	0.00612742	0.00687415	0.00890787	0.00121595	0.000369374	0.00264545	0.00644238	0.00397343	0.00300351	0.00520093	0.00651224	0.000229899	0.00664729	0.00259996	0.00245675	0.00378074	0.00267095	0.00521805	0.00299444	0.00113062	0.00140183	0.000333962	0.000476205	0.00262217	0.00279178	0.000191181	7.84698e-05	0.00364942	0.000234025	0.00069845	0.00060899	0.00296269
12.5005	0.000487956	0.000110484	0.00166262	0.000685278	0.000320961	9.32776e-05	0.000262635	0.00094118	0.000286092	0.000207686	0.00169753	0.00488706	0.018007	0.00856638	0.00747148	7.3566e-05	0.00822548	0.00630431	0.00708965	0.00913238	0.00126666	0.000389387	0.00273267	0.00663519	0.00409597	0.00311468	0.00535707	0.00670213	0.000242518	0.00683731	0.00268903	0.00254156	0.00390075	0.00276348	0.00537417	0.0030906	0.00118216	0.00145581	0.000349902	0.000499196	0.00271012	0.00289535	0.000201348	8.28049e-05	0.00377103	0.000245597	0.000728969	0.00063497	0.00306833
12.5303	0.000510325	0.00011673	0.00172999	0.00071569	0.000336484	9.8123e-05	0.00027612	0.000980989	0.000300347	0.00021838	0.00176769	0.00505149	0.0184123	0.00884776	0.00771851	7.79106e-05	0.00843574	0.00648653	0.00731206	0.00936281	0.0013195	0.000410447	0.00282277	0.00683389	0.00422236	0.00322976	0.0055178	0.00689801	0.000255806	0.00703287	0.00278101	0.00262928	0.00402431	0.00285896	0.00553448	0.00318962	0.00123586	0.00151172	0.000366552	0.000523232	0.00280082	0.00300247	0.000212025	8.73653e-05	0.0038964	0.000257707	0.000760723	0.000661982	0.00317746
12.5601	0.000533651	0.00012331	0.00179982	0.000747352	0.000352722	0.00010321	0.000290254	0.00102242	0.000315276	0.0002296	0.00184059	0.00522142	0.0188281	0.00913844	0.00797364	8.25102e-05	0.00865169	0.00667427	0.00754164	0.00959934	0.00137459	0.000432608	0.00291584	0.00703869	0.00435274	0.00334889	0.00568326	0.00710013	0.000269796	0.00723416	0.002876	0.00272001	0.00415153	0.00295746	0.00569908	0.00329157	0.0012918	0.00156962	0.00038394	0.00054836	0.00289435	0.00311325	0.000223235	9.21617e-05	0.00402566	0.00027038	0.000793759	0.000690065	0.00329019
12.5899	0.000557972	0.000130243	0.00187219	0.000780314	0.000369706	0.00010855	0.000305067	0.00106553	0.000330909	0.000241374	0.00191633	0.00539706	0.0192548	0.00943876	0.00823718	8.73802e-05	0.00887352	0.00686775	0.00777866	0.00984222	0.00143203	0.000455926	0.00301202	0.0072498	0.00448728	0.00347223	0.0058536	0.00730874	0.000284526	0.00744138	0.00297411	0.00281388	0.00428252	0.00305909	0.00586807	0.00339654	0.00135006	0.00162959	0.000402097	0.000574626	0.00299081	0.00322782	0.000235003	9.72057e-05	0.00415891	0.000283641	0.000828123	0.000719258	0.00340663
12.6197	0.000583326	0.000137544	0.00194719	0.000814623	0.000387468	0.000114155	0.000320588	0.0011104	0.000347278	0.000253727	0.00199503	0.0055786	0.0196928	0.00974907	0.00850944	9.25373e-05	0.00910145	0.00706722	0.00802341	0.0100917	0.00149193	0.000480463	0.00311142	0.00746747	0.00462614	0.00359992	0.00602898	0.00752413	0.000300035	0.00765476	0.00307543	0.00291102	0.00441738	0.00316392	0.00604158	0.00350463	0.00141073	0.00169169	0.000421056	0.000602081	0.0030903	0.0033463	0.000247355	0.000102509	0.00429628	0.000297513	0.000863864	0.000749603	0.00352689
12.6496	0.000609756	0.000145234	0.00202489	0.000850332	0.000406044	0.000120038	0.000336851	0.00115709	0.000364417	0.000266687	0.0020768	0.00576629	0.0201427	0.0100697	0.00879075	9.79992e-05	0.0093357	0.0072729	0.00827617	0.0103479	0.00155442	0.000506281	0.00321417	0.00769194	0.00476951	0.00373213	0.00620958	0.0077466	0.000316362	0.00787451	0.00318007	0.00301155	0.00455623	0.00327206	0.00621972	0.00361591	0.0014739	0.001756	0.000440849	0.000630774	0.0031929	0.00346882	0.000260318	0.000108084	0.00443789	0.000312025	0.000901032	0.000781142	0.00365109
12.6794	0.000637303	0.00015333	0.00210538	0.000887493	0.00042547	0.000126213	0.000353887	0.00120569	0.00038236	0.000280284	0.00216175	0.00596033	0.0206048	0.0104012	0.00908146	0.000103785	0.00957647	0.00748506	0.00853726	0.0106113	0.00161961	0.000533447	0.0033204	0.00792345	0.00491757	0.00386902	0.00639556	0.00797645	0.000333552	0.00810087	0.00328816	0.00311562	0.00469919	0.0033836	0.0064026	0.00373049	0.00153966	0.00182258	0.000461511	0.000660761	0.00329872	0.00359551	0.000273922	0.000113944	0.00458386	0.000327204	0.000939679	0.00081392	0.00377935
12.7092	0.000666012	0.000161854	0.00218875	0.00092616	0.000445783	0.000132693	0.000371733	0.00125627	0.000401144	0.000294548	0.00225001	0.00616098	0.0210796	0.0107437	0.00938191	0.000109914	0.00982402	0.00770395	0.00880699	0.0108819	0.00168764	0.000562032	0.00343025	0.00816229	0.0050705	0.00401076	0.00658712	0.00821399	0.000351648	0.00833408	0.00339979	0.00322336	0.00484638	0.00349864	0.00659036	0.00384845	0.00160811	0.00189152	0.000483077	0.000692095	0.00340786	0.00372651	0.000288195	0.000120102	0.00473433	0.000343079	0.000979858	0.000847983	0.0039118
12.739	0.000695928	0.000170828	0.00227508	0.000966392	0.000467022	0.000139493	0.000390423	0.00130892	0.000420807	0.000309511	0.00234171	0.00636847	0.0215678	0.0110978	0.00969248	0.000116409	0.0100786	0.00792987	0.0090857	0.0111602	0.00175866	0.00059211	0.00354387	0.00840871	0.00522853	0.00415755	0.00678442	0.00845958	0.0003707	0.00857439	0.0035151	0.00333493	0.00499792	0.00361728	0.00678311	0.00396991	0.00167935	0.0019629	0.000505586	0.000724835	0.00352044	0.00386196	0.000303168	0.000126572	0.00488943	0.000359679	0.00102162	0.000883377	0.00404856
12.7688	0.000727098	0.000180272	0.00236447	0.00100825	0.000489228	0.000146628	0.000409995	0.00136371	0.000441388	0.000325207	0.00243698	0.00658307	0.0220697	0.0114639	0.0100135	0.000123293	0.0103404	0.0081631	0.00937373	0.0114463	0.00183281	0.000623759	0.00366141	0.00866301	0.00539185	0.00430957	0.00698767	0.00871355	0.000390756	0.00882207	0.0036342	0.00345049	0.00515396	0.00373963	0.00698099	0.00409496	0.00175348	0.00203681	0.000529075	0.000759042	0.00363655	0.00400201	0.000318875	0.000133369	0.00504929	0.000377037	0.00106503	0.000920154	0.00418976
12.7986	0.000759572	0.00019021	0.00245701	0.00105178	0.000512445	0.000154115	0.000430488	0.00142075	0.000462929	0.000341672	0.00253597	0.00680504	0.0225859	0.0118424	0.0103455	0.000130589	0.0106097	0.00840395	0.00967145	0.0117406	0.00191024	0.000657061	0.00378302	0.00892549	0.00556068	0.00446701	0.00719708	0.00897627	0.000411869	0.00907738	0.00375722	0.00357021	0.00531461	0.00386579	0.00718413	0.00422371	0.0018306	0.00211331	0.000553584	0.000794778	0.00375632	0.00414681	0.000335348	0.000140509	0.00521405	0.000395184	0.00111014	0.000958363	0.00433554
12.8284	0.000793399	0.000200667	0.00255279	0.00109706	0.000536716	0.00016197	0.000451944	0.00148012	0.000485473	0.000358941	0.00263881	0.00703465	0.0231171	0.0122337	0.0106888	0.000138325	0.0108869	0.00865274	0.00997922	0.0120434	0.00199112	0.000692103	0.00390888	0.00919644	0.00573527	0.00463009	0.00741284	0.00924813	0.000434095	0.00934061	0.00388431	0.00369425	0.00548002	0.00399588	0.00739266	0.00435626	0.00191084	0.00219251	0.000579155	0.000832108	0.00387987	0.00429652	0.000352622	0.000148006	0.00538387	0.000414154	0.00115701	0.000998057	0.00448603
12.8582	0.000828633	0.000211667	0.00265192	0.00114416	0.000562087	0.00017021	0.000474404	0.00154192	0.000509065	0.000377053	0.00274565	0.0072722	0.0236637	0.0126385	0.0110439	0.000146528	0.0111721	0.0089098	0.0102974	0.012355	0.00207563	0.000728976	0.00403915	0.00947619	0.00591584	0.00479901	0.00763517	0.00952951	0.000457492	0.00961205	0.00401558	0.0038228	0.00565032	0.00413	0.00760673	0.00449274	0.00199429	0.0022745	0.000605832	0.000871099	0.00400732	0.00445131	0.000370735	0.000155879	0.00555888	0.000433983	0.0012057	0.00103929	0.00464137
12.888	0.000865328	0.000223238	0.00275449	0.00119313	0.000588607	0.000178855	0.000497912	0.00160625	0.000533751	0.00039605	0.00285666	0.00751799	0.0242263	0.013057	0.0114111	0.000155228	0.0114656	0.00917547	0.0106265	0.0126756	0.00216395	0.000767775	0.00417401	0.00976506	0.00610266	0.00497399	0.0078643	0.00982084	0.000482121	0.009892	0.00415119	0.00395604	0.00582567	0.00426828	0.00782648	0.00463324	0.00208107	0.00235937	0.000633659	0.000911824	0.00413878	0.00461133	0.000389724	0.000164144	0.00573925	0.000454707	0.00125628	0.00108212	0.00480171
12.9178	0.000903539	0.000235407	0.00286061	0.00124405	0.000616326	0.000187923	0.000522514	0.00167322	0.000559582	0.000415973	0.002972	0.00777232	0.0248057	0.0134899	0.011791	0.000164456	0.0117678	0.00945012	0.0109668	0.0130057	0.00225627	0.000808601	0.00431365	0.0100634	0.00629597	0.00515526	0.00810046	0.0101225	0.000508046	0.0101808	0.00429127	0.00409418	0.00600622	0.00441083	0.00805205	0.00477789	0.00217131	0.00244721	0.000662682	0.000954353	0.0042744	0.00477676	0.000409629	0.000172819	0.00592512	0.000476365	0.00130881	0.00112661	0.00496719
12.9476	0.000943325	0.000248203	0.00297038	0.00129699	0.000645297	0.000197435	0.000548258	0.00174293	0.000586607	0.000436866	0.00309183	0.00803551	0.0254023	0.0139377	0.012184	0.000174247	0.012079	0.00973412	0.0113187	0.0133456	0.00235278	0.000851561	0.00445825	0.0103715	0.00649605	0.00534307	0.00834388	0.010435	0.000535336	0.0104787	0.00443599	0.00423741	0.00619211	0.00455778	0.0082836	0.00492682	0.00226512	0.00253813	0.00069295	0.000998765	0.00441431	0.00494779	0.000430492	0.000181923	0.00611665	0.000498994	0.00136335	0.00117282	0.00513796
12.9774	0.000984746	0.000261656	0.00308391	0.00135202	0.000675573	0.000207411	0.000575194	0.00181549	0.000614879	0.000458776	0.00321633	0.0083079	0.0260167	0.0144009	0.0125907	0.000184637	0.0123994	0.0100279	0.0116828	0.0136956	0.00245371	0.000896765	0.00460802	0.0106898	0.00670316	0.00553765	0.0085948	0.0107588	0.000564062	0.0107861	0.00458548	0.00438594	0.00638351	0.00470925	0.00852128	0.00508013	0.00236264	0.00263222	0.000724512	0.00104514	0.00455863	0.0051246	0.000452356	0.000191476	0.00631402	0.000522637	0.00141999	0.0012208	0.00531418
13.0072	0.00102786	0.000275797	0.00320131	0.00140922	0.000707211	0.000217873	0.000603372	0.00189104	0.000644455	0.000481751	0.00334567	0.00858982	0.0266498	0.01488	0.0130115	0.000195664	0.0127293	0.0103317	0.0120595	0.0140561	0.00255927	0.000944331	0.00476316	0.0110187	0.00691761	0.00573926	0.00885348	0.0110942	0.000594297	0.0111032	0.00473992	0.00454	0.00658057	0.00486538	0.00876524	0.00523796	0.00246398	0.00272961	0.000757421	0.00109355	0.00470752	0.00530737	0.000475265	0.000201498	0.00651737	0.000547336	0.00147878	0.00127063	0.005496
13.037	0.00107274	0.00029066	0.00332269	0.00146867	0.00074027	0.000228845	0.000632846	0.00196967	0.000675391	0.000505842	0.00348006	0.00888162	0.027302	0.0153757	0.013447	0.000207368	0.0130692	0.0106461	0.0124491	0.0144273	0.00266969	0.00099438	0.00492388	0.0113584	0.00713968	0.00594816	0.00912017	0.0114419	0.000626121	0.0114306	0.00489945	0.0046998	0.00678346	0.00502628	0.00901564	0.00540043	0.00256929	0.00283038	0.00079173	0.00114409	0.00486112	0.00549631	0.000499267	0.00021201	0.00672689	0.000573134	0.0015398	0.00132237	0.00568359
13.0668	0.00111945	0.000306278	0.00344816	0.00153044	0.000774812	0.00024035	0.000663671	0.00205153	0.000707747	0.000531101	0.00361967	0.00918367	0.027974	0.0158885	0.0138976	0.000219795	0.0134193	0.0109715	0.0128523	0.0148098	0.00278522	0.00104704	0.00509041	0.0117095	0.00736967	0.00616463	0.00939514	0.0118023	0.000659615	0.0117685	0.00506426	0.00486559	0.00699234	0.00519211	0.00927265	0.00556768	0.0026787	0.00293467	0.000827494	0.00119685	0.00501956	0.00569161	0.000524409	0.000223034	0.00694275	0.000600079	0.00160313	0.00137609	0.0058771
13.0966	0.00116805	0.000322687	0.00357784	0.00159464	0.000810898	0.000252412	0.000695905	0.00213675	0.000741586	0.000557583	0.00376472	0.00949634	0.0286665	0.0164191	0.014364	0.000232988	0.0137799	0.0113083	0.0132695	0.0152038	0.00290611	0.00110245	0.00526295	0.0120722	0.0076079	0.00638893	0.00967866	0.0121759	0.000694866	0.0121172	0.00523451	0.0050376	0.00720739	0.00536299	0.00953643	0.00573984	0.00279235	0.00304257	0.000864771	0.00125192	0.00518301	0.00589349	0.000550743	0.000234594	0.00716511	0.000628216	0.00166884	0.00143187	0.0060767
13.1264	0.00121861	0.000339925	0.00371185	0.00166133	0.000848596	0.000265059	0.000729608	0.00222544	0.00077697	0.000585346	0.00391541	0.00982	0.0293801	0.0169679	0.0148467	0.000246999	0.0141514	0.0116569	0.0137011	0.0156098	0.00303261	0.00116075	0.00544175	0.012447	0.00785468	0.00662136	0.009971	0.0125632	0.000731963	0.0124772	0.00541037	0.00521607	0.00742878	0.00553908	0.00980714	0.00591704	0.00291038	0.00315422	0.00090362	0.00130938	0.00535161	0.00610214	0.00057832	0.000246713	0.00739417	0.000657596	0.001737	0.00148977	0.00628256
13.1562	0.00127122	0.000358029	0.00385031	0.00173061	0.000887973	0.000278318	0.000764841	0.00231776	0.000813968	0.00061445	0.00407194	0.0101551	0.0301155	0.0175357	0.0153463	0.000261878	0.0145341	0.0120178	0.0141478	0.016028	0.00316502	0.00122208	0.00562704	0.0128343	0.00811035	0.0068622	0.0102724	0.0129647	0.000771002	0.0128488	0.00559202	0.00540127	0.00765669	0.00572051	0.010085	0.00609943	0.00303295	0.00326973	0.000944102	0.00136935	0.00552553	0.00631779	0.000607196	0.000259416	0.00763011	0.000688269	0.00180772	0.00154988	0.00649487
13.186	0.00132594	0.000377041	0.00399334	0.00180257	0.000929101	0.000292216	0.000801668	0.00241385	0.000852649	0.000644957	0.00423455	0.0105019	0.0308734	0.0181231	0.0158634	0.00027768	0.0149284	0.0123915	0.0146099	0.0164589	0.0033036	0.0012866	0.00581907	0.0132346	0.00837523	0.00711176	0.0105833	0.013381	0.00081208	0.0132325	0.00577965	0.00559345	0.00789128	0.00590743	0.0103701	0.00628713	0.00316021	0.00338923	0.000986281	0.00143191	0.00570491	0.00654066	0.000637427	0.000272729	0.00787311	0.000720289	0.00188105	0.00161228	0.00671378
13.2158	0.00138284	0.000397002	0.00414107	0.00187731	0.000972052	0.000306784	0.000840156	0.00251386	0.000893085	0.000676932	0.00440345	0.010861	0.0316543	0.0187308	0.0163985	0.000294466	0.0153346	0.0127785	0.0150881	0.0169029	0.00344867	0.00135448	0.00601807	0.0136481	0.00864967	0.00737034	0.0109038	0.0138127	0.000855303	0.0136286	0.00597344	0.00579288	0.00813275	0.0061	0.0106626	0.00648031	0.0032923	0.00351284	0.00103022	0.00149718	0.00588993	0.00677098	0.000669071	0.000286679	0.00812336	0.000753708	0.0019571	0.00167704	0.00693948
13.2456	0.00144202	0.000417956	0.00429362	0.00195491	0.0010169	0.000322051	0.000880372	0.00261793	0.00093535	0.000710443	0.00457888	0.0112327	0.032459	0.0193594	0.0169523	0.000312296	0.0157531	0.0131792	0.0155829	0.0173603	0.00360052	0.00142587	0.00622431	0.0140755	0.008934	0.00763826	0.0112343	0.0142602	0.000900776	0.0140374	0.00617359	0.00599984	0.00838128	0.00629838	0.0109628	0.0066791	0.00342939	0.0036407	0.00107599	0.00156527	0.00608074	0.00700898	0.00070219	0.000301293	0.00838105	0.000788585	0.00203594	0.00174425	0.00717216
13.2754	0.00150355	0.000439948	0.00445112	0.00203549	0.00106373	0.000338051	0.000922389	0.00272623	0.000979521	0.00074556	0.00476108	0.0116174	0.033288	0.0200095	0.0175254	0.000331236	0.0161842	0.0135941	0.0160949	0.0178314	0.00375948	0.00150096	0.00643804	0.014517	0.0092286	0.00791585	0.0115751	0.0147241	0.000948615	0.0144596	0.00638029	0.0062146	0.00863704	0.00650271	0.0112708	0.00688364	0.00357164	0.00377294	0.00112367	0.00163628	0.00627751	0.00725489	0.000736847	0.000316601	0.00864638	0.000824978	0.00211766	0.001814	0.007412
13.3052	0.00156751	0.000463027	0.00461371	0.00211915	0.00111262	0.000354816	0.000966279	0.00283891	0.00102568	0.000782357	0.0049503	0.0120156	0.034142	0.0206819	0.0181183	0.000351355	0.0166283	0.0140238	0.0166245	0.0183168	0.00392588	0.00157993	0.00665953	0.0149732	0.0095338	0.00820342	0.0119264	0.015205	0.000998935	0.0148953	0.00659373	0.00643745	0.00890023	0.00671316	0.0115867	0.00709409	0.00371921	0.0039097	0.00117331	0.00171033	0.00648041	0.00750896	0.000773108	0.000332632	0.00891954	0.000862947	0.00220237	0.00188639	0.00765918
13.335	0.001634	0.00048724	0.00478152	0.00220598	0.00116365	0.000372382	0.00101212	0.00295614	0.00107391	0.00082091	0.00514678	0.0124278	0.0350216	0.0213773	0.0187318	0.000372727	0.0170857	0.0144687	0.0171723	0.0188167	0.00410007	0.00166297	0.00688905	0.0154444	0.00984999	0.0085013	0.0122887	0.0157035	0.00105186	0.0153452	0.00681412	0.00666868	0.00917104	0.00692991	0.0119108	0.00731061	0.00387228	0.00405112	0.001225	0.00178754	0.00668962	0.00777142	0.00081104	0.000349418	0.00920074	0.000902556	0.00229015	0.00196149	0.00791391
13.3648	0.00170309	0.000512639	0.00495469	0.00229611	0.00121691	0.000390783	0.00105999	0.00307809	0.00112429	0.000861298	0.00535078	0.0128543	0.0359274	0.0220963	0.0193665	0.000395428	0.0175568	0.0149293	0.017739	0.0193316	0.00428239	0.00175027	0.00712688	0.0159311	0.0101775	0.00880985	0.0126622	0.0162201	0.00110752	0.0158095	0.00704167	0.00690859	0.00944965	0.00715311	0.0122433	0.00753334	0.00403102	0.00419734	0.00127881	0.00186804	0.0069053	0.00804254	0.000850714	0.000366991	0.00949017	0.000943867	0.00238109	0.00203941	0.00817636
13.3946	0.00177489	0.000539278	0.00513334	0.00238963	0.0012725	0.000410059	0.00110996	0.00320493	0.00117691	0.000903604	0.00556257	0.0132957	0.03686	0.0228397	0.020023	0.000419542	0.0180419	0.0154063	0.0183251	0.0198617	0.00447321	0.00184204	0.00737328	0.0164338	0.0105168	0.0091294	0.0130472	0.0167554	0.00116605	0.0162888	0.00727658	0.00715747	0.00973624	0.00738294	0.0125843	0.00776244	0.00419561	0.00434851	0.00133483	0.00195194	0.00712763	0.00832257	0.000892202	0.000385384	0.00978804	0.000986949	0.00247531	0.00212025	0.00844674
13.4245	0.00184948	0.000567211	0.00531762	0.00248667	0.0013305	0.000430248	0.00116213	0.00333685	0.00123187	0.000947913	0.00578242	0.0137524	0.0378199	0.0236081	0.020702	0.000445153	0.0185414	0.0159	0.0189311	0.0204075	0.00467292	0.00193851	0.00762855	0.0169529	0.0108681	0.0094603	0.0134441	0.01731	0.00122758	0.0167834	0.00751907	0.00741564	0.010031	0.00761957	0.012934	0.00799806	0.00436622	0.00450478	0.00139313	0.00203939	0.00735678	0.00861175	0.000935581	0.000404633	0.0100946	0.00103187	0.00257288	0.00220411	0.00872525
13.4543	0.00192697	0.000596496	0.00550768	0.00258734	0.001391	0.000451391	0.00121657	0.00347402	0.00128926	0.000994314	0.00601059	0.0142248	0.0388077	0.0244023	0.021404	0.000472352	0.0190556	0.0164111	0.0195577	0.0209693	0.00488191	0.00203988	0.00789297	0.0174889	0.011232	0.0098029	0.0138531	0.0178844	0.00129226	0.0172938	0.00776934	0.00768339	0.0103342	0.00786319	0.0132926	0.00824038	0.00454304	0.00466631	0.00145379	0.00213051	0.00759295	0.00891037	0.000980928	0.000424774	0.0104099	0.0010787	0.00267393	0.00229109	0.00901209
13.4841	0.00200745	0.000627192	0.00570365	0.00269177	0.00145412	0.000473529	0.00127339	0.00361664	0.00134917	0.0010429	0.00624739	0.0147136	0.0398239	0.025223	0.0221298	0.000501236	0.0195849	0.0169401	0.0202055	0.0215475	0.00510057	0.0021464	0.00816685	0.0180422	0.0116087	0.0101576	0.0142747	0.0184792	0.00136025	0.0178204	0.00802762	0.00796106	0.0106459	0.00811397	0.0136603	0.00848954	0.00472625	0.00483324	0.00151691	0.00222544	0.0078363	0.00921867	0.00102832	0.000445844	0.0107344	0.00112752	0.00277856	0.0023813	0.00930747
13.5139	0.00209102	0.000659362	0.00590567	0.00280006	0.00151995	0.000496708	0.00133266	0.00376489	0.00141171	0.00109376	0.00649308	0.015219	0.0408691	0.026071	0.02288	0.000531903	0.0201296	0.0174875	0.020875	0.0221424	0.00532932	0.00225829	0.00845046	0.0186132	0.0119986	0.0105247	0.0147091	0.0190951	0.0014317	0.0183637	0.00829414	0.00824895	0.0109663	0.00837211	0.0140372	0.00874572	0.00491606	0.00500575	0.00158258	0.00232433	0.00808702	0.00953694	0.00107785	0.000467881	0.0110681	0.0011784	0.00288687	0.00247485	0.00961158
13.5437	0.00217779	0.000693068	0.0061139	0.00291237	0.00158859	0.000520971	0.00139448	0.00391898	0.00147697	0.00114701	0.00674796	0.0157417	0.0419437	0.0269469	0.0236553	0.000564461	0.0206901	0.0180539	0.0215668	0.0227543	0.00556859	0.00237582	0.00874413	0.0192025	0.0124022	0.0109045	0.0151567	0.0197324	0.00150676	0.0189241	0.00856911	0.00854739	0.0112957	0.0086378	0.0144236	0.00900909	0.00511264	0.00518399	0.00165088	0.00242732	0.0083453	0.00986544	0.0011296	0.000490927	0.0114113	0.00123141	0.00299897	0.00257186	0.00992464
13.5735	0.00226786	0.000728379	0.00632849	0.0030288	0.00166016	0.000546367	0.00145896	0.0040791	0.00154508	0.00120273	0.00701233	0.0162821	0.0430481	0.0278515	0.0244563	0.00059902	0.0212666	0.0186397	0.0222816	0.0233836	0.00581882	0.00249923	0.00904814	0.0198104	0.0128199	0.0112976	0.0156178	0.020392	0.00158562	0.0195021	0.00885276	0.0088567	0.0116343	0.00891122	0.0148196	0.0092798	0.00531621	0.00536813	0.0017219	0.00253456	0.00861132	0.0102045	0.00118366	0.000515022	0.0117642	0.00128664	0.00311499	0.00267243	0.0102469
13.6033	0.00236135	0.000765362	0.00654957	0.0031495	0.00173476	0.000572944	0.00152618	0.00424546	0.00161613	0.00126104	0.0072865	0.0168408	0.0441829	0.0287855	0.0252836	0.000635697	0.0218596	0.0192457	0.0230199	0.0240307	0.00608045	0.00262879	0.00936282	0.0204374	0.013252	0.0117042	0.0160927	0.0210742	0.00166844	0.0200982	0.00914532	0.00917721	0.0119821	0.00919257	0.0152255	0.00955803	0.00552696	0.00555833	0.00179576	0.00264621	0.00888527	0.0105543	0.00124011	0.00054021	0.0121271	0.00134418	0.00323502	0.00277669	0.0105784
13.6331	0.00245836	0.00080409	0.0067773	0.00327459	0.00181252	0.000600754	0.00159626	0.00441827	0.00169023	0.00132205	0.00757077	0.0174181	0.0453484	0.0297496	0.0261379	0.000674614	0.0224693	0.0198723	0.0237824	0.0246957	0.00635396	0.00276478	0.00968848	0.021084	0.0136989	0.0121247	0.0165818	0.0217796	0.00175542	0.0207127	0.00944704	0.00950926	0.0123395	0.00948206	0.0156414	0.00984396	0.0057451	0.00575477	0.00187254	0.00276242	0.00916734	0.0109152	0.00129906	0.000566536	0.0125001	0.0014041	0.0033592	0.00288477	0.0109196
13.6629	0.00255901	0.000844636	0.00701184	0.00340423	0.00189355	0.000629849	0.0016693	0.00459775	0.00176752	0.00138586	0.00786545	0.0180146	0.046545	0.0307446	0.0270198	0.0007159	0.0230961	0.02052	0.0245696	0.0253791	0.00663981	0.00290748	0.0100254	0.0217506	0.0141611	0.0125594	0.0170854	0.0225088	0.00184673	0.0213462	0.00975813	0.00985318	0.0127066	0.00977989	0.0160675	0.0101378	0.00597083	0.00595763	0.00195234	0.00288336	0.00945772	0.0112875	0.00136061	0.000594045	0.0128835	0.00146651	0.00348764	0.00299678	0.0112706
13.6927	0.00266342	0.000887078	0.00725333	0.00353855	0.00197797	0.000660283	0.0017454	0.00478411	0.0018481	0.00145261	0.00817087	0.0186309	0.0477731	0.0317711	0.02793	0.00075969	0.0237404	0.0211895	0.0253821	0.0260812	0.00693848	0.00305718	0.010374	0.0224377	0.014639	0.0130089	0.0176038	0.0232624	0.00194257	0.021999	0.0100789	0.0102093	0.0130835	0.0100863	0.016504	0.0104396	0.00620436	0.00616708	0.00203528	0.0030092	0.0097566	0.0116714	0.00142485	0.000622786	0.0132775	0.00153148	0.00362046	0.00311286	0.0116316
13.7225	0.00277172	0.000931494	0.00750194	0.0036777	0.00206591	0.000692114	0.00182469	0.00497757	0.0019321	0.0015224	0.00848734	0.0192674	0.0490331	0.0328299	0.028869	0.000806125	0.0244023	0.0218812	0.0262206	0.0268022	0.00725049	0.00321419	0.0107345	0.0231456	0.0151329	0.0134734	0.0181375	0.0240409	0.00204315	0.0226717	0.0104094	0.010578	0.0134705	0.0104014	0.0169512	0.0107497	0.00644593	0.00638331	0.00212146	0.0031401	0.0100642	0.0120673	0.00149189	0.000652809	0.0136823	0.00159911	0.00375779	0.00323314	0.0120028
13.7523	0.00288401	0.000977968	0.00775781	0.00382183	0.00215749	0.000725399	0.00190727	0.00517837	0.00201964	0.00159537	0.0088152	0.0199247	0.0503251	0.0339218	0.0298376	0.000855353	0.0250822	0.0225958	0.0270856	0.0275424	0.00757634	0.00337882	0.0111072	0.0238749	0.0156433	0.0139533	0.0186867	0.0248448	0.00214868	0.0233647	0.0107501	0.0109596	0.0138678	0.0107255	0.0174091	0.0110682	0.00669573	0.00660649	0.00221099	0.00327625	0.0103806	0.0124755	0.00156184	0.000684164	0.0140981	0.0016695	0.00389977	0.00335776	0.0123845
13.7821	0.00300043	0.00102658	0.00802111	0.00397108	0.00225285	0.000760201	0.00199327	0.00538673	0.00211086	0.00167164	0.00915477	0.0206032	0.0516496	0.0350473	0.0308363	0.000907529	0.0257805	0.0233338	0.0279777	0.0283021	0.00791654	0.00355139	0.0114926	0.0246259	0.0161706	0.0144491	0.0192519	0.0256746	0.00225938	0.0240785	0.0111012	0.0113544	0.0142756	0.0110589	0.0178781	0.0113953	0.006954	0.00683682	0.00230399	0.00341782	0.0107062	0.0128962	0.0016348	0.000716905	0.0145253	0.00174274	0.00404651	0.00348685	0.0127769
13.8119	0.00312112	0.00107743	0.00829199	0.00412563	0.00235214	0.000796581	0.00208279	0.0056029	0.0022059	0.00175135	0.00950639	0.0213035	0.0530067	0.0362072	0.0318657	0.000962816	0.0264974	0.0240958	0.0288975	0.0290816	0.00827165	0.00373224	0.0118909	0.0253991	0.0167151	0.0149611	0.0198332	0.0265309	0.00237546	0.0248135	0.0114629	0.0117628	0.014694	0.0114016	0.0183582	0.0117311	0.00722096	0.0070745	0.00240057	0.00356499	0.0110411	0.0133298	0.0017109	0.000751087	0.0149639	0.00181895	0.00419816	0.00362056	0.0131802
13.8417	0.00324619	0.0011306	0.00857062	0.00428562	0.00245547	0.000834604	0.00217598	0.00582711	0.00230488	0.00183464	0.00987041	0.022026	0.0543966	0.0374023	0.0329264	0.00102138	0.0272332	0.0248823	0.0298457	0.0298811	0.00864219	0.0039217	0.0123025	0.026195	0.0172774	0.0154897	0.0204311	0.0274141	0.00249717	0.0255703	0.0118354	0.0121852	0.0151232	0.011754	0.0188498	0.012076	0.00749683	0.0073197	0.00250086	0.00371796	0.0113854	0.0137766	0.00179025	0.000786766	0.0154144	0.00189823	0.00435485	0.00375903	0.0135946
13.8715	0.00337578	0.00118618	0.00885714	0.00445121	0.00256301	0.000874339	0.00227296	0.00605961	0.00240795	0.00192165	0.0102472	0.0227714	0.0558197	0.0386331	0.034019	0.00108341	0.0279882	0.0256939	0.0308228	0.0307009	0.00902873	0.00412012	0.0127276	0.0270138	0.0178578	0.0160353	0.021046	0.0283247	0.00262475	0.0263491	0.012219	0.0126219	0.0155634	0.0121163	0.019353	0.01243	0.00778187	0.00757264	0.00260497	0.00387692	0.0117394	0.0142369	0.00187298	0.000824002	0.0158768	0.00198067	0.00451672	0.00390241	0.0140204
13.9013	0.00351005	0.00124428	0.00915173	0.00462258	0.00267489	0.000915855	0.00237385	0.00630065	0.00251525	0.00201252	0.010637	0.02354	0.0572759	0.0399003	0.035144	0.00114908	0.0287627	0.0265311	0.0318293	0.0315412	0.00943184	0.00432788	0.0131668	0.0278562	0.0184568	0.0165983	0.0216781	0.0292633	0.00275844	0.0271506	0.0126141	0.0130732	0.0160148	0.0124887	0.019868	0.0127934	0.00807629	0.00783351	0.00271303	0.00404207	0.0121033	0.014711	0.0019592	0.000862854	0.0163514	0.00206641	0.00468392	0.00405085	0.0144577
13.9311	0.00364911	0.001305	0.00945455	0.00479989	0.00279127	0.000959223	0.0024788	0.00655048	0.00262694	0.00210741	0.0110403	0.0243324	0.0587655	0.0412046	0.0363021	0.00121859	0.0295569	0.0273945	0.0328659	0.0324023	0.0098521	0.00454533	0.0136202	0.0287224	0.0190746	0.0171791	0.0223278	0.0302303	0.0028985	0.0279751	0.0130207	0.0135396	0.0164775	0.0128714	0.0203951	0.0131664	0.00838034	0.00810252	0.00282518	0.0042136	0.0124774	0.0151993	0.00204905	0.000903386	0.0168386	0.00215555	0.00485659	0.00420451	0.0149069
13.9609	0.00379312	0.00136843	0.00976575	0.00498332	0.00291231	0.00100452	0.00258794	0.00680935	0.00274317	0.00220648	0.0114574	0.0251492	0.0602886	0.0425467	0.0374936	0.00129214	0.0303712	0.0282846	0.033933	0.0332844	0.0102901	0.00477287	0.0140882	0.0296129	0.0197119	0.017778	0.0229955	0.0312262	0.00304519	0.0288232	0.0134393	0.0140213	0.0169519	0.0132648	0.0209344	0.0135491	0.00869426	0.00837988	0.00294154	0.00439173	0.0128617	0.0157021	0.00214266	0.000945663	0.0173384	0.00224821	0.00503488	0.00436355	0.015368
13.9907	0.00394223	0.00143469	0.0100855	0.00517305	0.00303816	0.00105182	0.00270141	0.00707754	0.0028641	0.00230988	0.0118886	0.0259908	0.0618452	0.0439272	0.0387192	0.00136994	0.0312057	0.029202	0.0350313	0.0341877	0.0107464	0.00501088	0.0145713	0.030528	0.0203689	0.0183955	0.0236815	0.0322513	0.0031988	0.0296952	0.0138701	0.0145188	0.0174379	0.013669	0.0214862	0.0139418	0.00901831	0.00866579	0.00306226	0.00457666	0.0132565	0.0162196	0.00224017	0.000989751	0.0178513	0.00234451	0.00521893	0.00452813	0.0158415
14.0205	0.00409658	0.00150389	0.010414	0.00536924	0.00316898	0.00110121	0.00281936	0.0073553	0.00298988	0.00241778	0.0123344	0.0268577	0.0634354	0.0453466	0.0399794	0.00145221	0.0320608	0.0301473	0.0361614	0.0351124	0.0112217	0.00525977	0.0150697	0.0314682	0.0210461	0.019032	0.0243861	0.0333062	0.00335959	0.0305916	0.0143132	0.0150324	0.0179359	0.0140843	0.0220507	0.0143448	0.00935272	0.00896047	0.00318746	0.00476861	0.0136621	0.0167523	0.00234172	0.00103572	0.0183773	0.00244457	0.00540891	0.00469842	0.0163274
14.0503	0.00425633	0.00157614	0.0107513	0.0055721	0.00330495	0.00115276	0.00294193	0.00764291	0.00312069	0.00253035	0.012795	0.0277504	0.0650592	0.0468055	0.0412746	0.00153919	0.0329366	0.0311209	0.0373236	0.0360587	0.0117166	0.00551995	0.0155838	0.0324338	0.0217439	0.0196879	0.0251097	0.0343912	0.00352787	0.0315129	0.0147692	0.0155625	0.018446	0.014511	0.0226282	0.0147581	0.00969777	0.00926415	0.0033173	0.0049678	0.0140786	0.0173005	0.00244746	0.00108364	0.0189168	0.00254854	0.00560497	0.00487458	0.016826
14.0801	0.00442164	0.00165156	0.0110978	0.00578179	0.00344623	0.00120656	0.00306928	0.00794064	0.00325668	0.00264777	0.0132709	0.0286694	0.0667165	0.0483047	0.0426052	0.00163112	0.0338334	0.0321235	0.0385186	0.0370269	0.0122317	0.00579184	0.016114	0.0334253	0.0224627	0.0203635	0.0258525	0.0355068	0.00370394	0.0324595	0.0152381	0.0161094	0.0189683	0.0149494	0.0232188	0.015182	0.0100537	0.00957703	0.00345192	0.00517446	0.0145062	0.0178645	0.00255753	0.00113359	0.0194701	0.00265653	0.00580728	0.00505679	0.0173375
14.1099	0.00459265	0.00173027	0.0114534	0.00599852	0.00359299	0.0012627	0.00320156	0.00824876	0.00339804	0.00277022	0.0137624	0.0296152	0.0684073	0.0498445	0.0439718	0.00172824	0.0347514	0.0331555	0.0397469	0.0380169	0.0127676	0.00607587	0.0166606	0.0344429	0.0232029	0.0210592	0.0266151	0.0366532	0.00388809	0.0334319	0.0157202	0.0166736	0.0195031	0.0153996	0.0238228	0.0156168	0.0104208	0.00989936	0.00359147	0.00538881	0.0149453	0.0184446	0.00267208	0.00118564	0.0200373	0.00276869	0.00601599	0.00524523	0.0178622
14.1397	0.00476954	0.0018124	0.0118184	0.00622248	0.00374543	0.00132127	0.00333893	0.00856755	0.00354495	0.00289788	0.0142699	0.0305882	0.0701315	0.0514255	0.0453747	0.00183081	0.0356909	0.0342175	0.0410089	0.0390292	0.013325	0.0063725	0.0172239	0.0354871	0.0239649	0.0217755	0.0273976	0.037831	0.00408066	0.0344305	0.0162159	0.0172553	0.0200505	0.015862	0.0244405	0.0160627	0.0107993	0.0102313	0.0037361	0.00561109	0.0153958	0.0190413	0.00279128	0.00123987	0.0206189	0.00288515	0.00623128	0.00544008	0.0184003
14.1695	0.00495247	0.00189808	0.0121929	0.00645387	0.00390371	0.00138237	0.00348155	0.00889731	0.00369758	0.00303094	0.0147938	0.0315889	0.071889	0.0530482	0.0468143	0.00193912	0.036652	0.03531	0.0423052	0.0400638	0.0139046	0.00668216	0.0178043	0.0365581	0.0247491	0.0225127	0.0282004	0.0390404	0.00428196	0.0354557	0.0167255	0.017855	0.0206108	0.0163368	0.0250721	0.0165199	0.0111894	0.0105732	0.00388597	0.00584154	0.0158582	0.0196548	0.00291529	0.00129636	0.0212149	0.00300606	0.00645331	0.00564152	0.018952
14.1994	0.00514161	0.00198744	0.0125772	0.00669288	0.00406803	0.00144609	0.00362959	0.00923832	0.00385612	0.00316961	0.0153344	0.0326179	0.0736797	0.0547132	0.048291	0.00205343	0.037635	0.0364335	0.0436361	0.0411208	0.014507	0.00700532	0.0184023	0.0376563	0.025556	0.0232711	0.0290238	0.0402818	0.00449233	0.036508	0.0172492	0.0184731	0.021184	0.0168244	0.0257178	0.0169886	0.0115916	0.0109252	0.00404124	0.00608039	0.0163326	0.0202856	0.00304428	0.0013552	0.0218257	0.00313156	0.00668225	0.00584974	0.0195175
14.2292	0.00533713	0.00208063	0.0129714	0.00693972	0.00423857	0.00151252	0.00378322	0.00959087	0.00402076	0.00331407	0.0158922	0.0336754	0.0755034	0.0564207	0.049805	0.00217405	0.03864	0.0375885	0.0450022	0.0422004	0.0151329	0.00734246	0.0190181	0.0387821	0.0263858	0.0240513	0.0298681	0.0415555	0.00471212	0.0375877	0.0177873	0.0191099	0.0217704	0.0173249	0.0263779	0.0174691	0.012006	0.0112876	0.00420208	0.00632789	0.0168192	0.0209339	0.00317841	0.00141648	0.0224516	0.00326182	0.0069183	0.00606492	0.020097
14.259	0.0055392	0.00217777	0.0133756	0.0071946	0.00441553	0.00158178	0.00394262	0.00995525	0.00419171	0.00346455	0.0164674	0.034762	0.0773599	0.0581714	0.0513568	0.00230129	0.0396672	0.0387755	0.0464038	0.0433028	0.015783	0.00769406	0.019652	0.0399356	0.027239	0.0248535	0.0307337	0.0428617	0.00494168	0.0386953	0.0183401	0.0197658	0.0223702	0.0178388	0.0270527	0.0179616	0.0124329	0.0116606	0.00436865	0.0065843	0.0173183	0.0216001	0.00331787	0.00148027	0.0230928	0.00339698	0.00716161	0.00628728	0.0206908
14.2888	0.005748	0.00227902	0.0137901	0.00745774	0.00459912	0.00165396	0.00410795	0.0103318	0.00436914	0.00362124	0.0170606	0.0358781	0.0792489	0.0599655	0.0529465	0.00243545	0.0407168	0.039995	0.0478413	0.0444281	0.0164579	0.00806061	0.0203045	0.0411174	0.028116	0.0256781	0.0316208	0.0442008	0.00518136	0.0398313	0.0189079	0.0204411	0.0229835	0.0183662	0.0277424	0.0184663	0.0128726	0.0120445	0.00454112	0.00684988	0.01783	0.0222847	0.00346284	0.00154668	0.0237497	0.0035372	0.00741239	0.006517	0.021299
14.3186	0.00596371	0.00238453	0.0142149	0.00772934	0.00478953	0.00172918	0.0042794	0.0107207	0.00455328	0.00378438	0.017672	0.0370241	0.0811702	0.0618034	0.0545744	0.00257688	0.0417889	0.0412475	0.0493151	0.0455764	0.0171584	0.00844261	0.0209759	0.0423275	0.0290172	0.0265255	0.0325298	0.045573	0.00543156	0.0409959	0.019491	0.0211363	0.0236105	0.0189075	0.0284473	0.0189836	0.0133254	0.0124394	0.00471967	0.00712487	0.0183546	0.0229878	0.00361349	0.0016158	0.0244225	0.00368265	0.00767082	0.00675429	0.021922
14.3484	0.00618652	0.00249445	0.0146503	0.00800963	0.00498696	0.00180755	0.00445716	0.0111224	0.00474433	0.00395418	0.0183021	0.0382003	0.0831235	0.0636854	0.0562408	0.00272592	0.0428837	0.0425335	0.0508256	0.0467478	0.0178851	0.00884057	0.0216666	0.0435663	0.0299428	0.0273961	0.0334609	0.0469786	0.00569264	0.0421897	0.0200897	0.0218517	0.0242514	0.019463	0.0291677	0.0195136	0.0137916	0.0128458	0.00490447	0.00740955	0.0188923	0.02371	0.00377004	0.00168773	0.0251114	0.0038335	0.00793708	0.00699935	0.0225598
14.3782	0.00641661	0.00260895	0.0150965	0.00829882	0.00519164	0.00188919	0.0046414	0.0115371	0.0049425	0.00413086	0.0189513	0.0394072	0.0851084	0.0656118	0.0579457	0.00288292	0.0440012	0.0438533	0.052373	0.0479425	0.0186388	0.00925502	0.0223768	0.0448341	0.0308934	0.0282902	0.0344145	0.0484176	0.00596499	0.043413	0.0207043	0.0225878	0.0249063	0.020033	0.0299038	0.0200566	0.0142715	0.0132637	0.00509572	0.00770419	0.0194433	0.0244516	0.00393266	0.00176256	0.0258168	0.00398993	0.00821137	0.0072524	0.0232127
14.408	0.00665418	0.00272817	0.0155536	0.00859715	0.00540378	0.00197421	0.00483234	0.0119652	0.00514801	0.00431468	0.0196198	0.0406451	0.0871247	0.0675828	0.0596893	0.00304825	0.0451417	0.0452074	0.0539577	0.0491605	0.0194202	0.00968647	0.023107	0.046131	0.0318691	0.0292081	0.0353907	0.0498904	0.00624902	0.0446662	0.0213351	0.0233448	0.0255755	0.0206178	0.030656	0.0206128	0.0147654	0.0136935	0.00529359	0.00800905	0.0200079	0.025213	0.00410158	0.00184041	0.026539	0.0041521	0.00849389	0.00751365	0.0238809
14.4378	0.00689941	0.0028523	0.0160217	0.00890484	0.00562359	0.00206273	0.00503016	0.0124069	0.00536107	0.00450585	0.0203081	0.0419143	0.089172	0.0695987	0.0614717	0.00322231	0.0463052	0.0465963	0.0555799	0.0504019	0.0202299	0.0101355	0.0238575	0.0474574	0.0328705	0.0301502	0.03639	0.0513971	0.00654512	0.0459496	0.0219825	0.0241232	0.0262591	0.0212178	0.0314245	0.0211826	0.0152737	0.0141354	0.00549828	0.00832442	0.0205863	0.0259944	0.00427698	0.00192138	0.0272783	0.0043202	0.00878485	0.00778332	0.0245646
14.4676	0.0071525	0.00298151	0.0165012	0.00922213	0.0058513	0.00215489	0.00523505	0.0128626	0.00558193	0.00470464	0.0210166	0.0432152	0.0912499	0.0716596	0.063293	0.00340548	0.0474918	0.0480203	0.0572399	0.0516669	0.0210686	0.0106026	0.0246286	0.0488133	0.0338978	0.0311169	0.0374125	0.0529377	0.00685373	0.0472637	0.0226467	0.0249232	0.0269574	0.0218331	0.0322097	0.0217662	0.0157966	0.0145897	0.00570997	0.00865058	0.0211786	0.0267964	0.0044591	0.00200558	0.0280349	0.00449442	0.00908444	0.00806163	0.025264
14.4974	0.00741366	0.00311597	0.0169921	0.00954925	0.00608715	0.00225081	0.00544724	0.0133326	0.00581079	0.00491129	0.0217457	0.0445481	0.0933579	0.0737655	0.0651532	0.00359818	0.0487017	0.0494799	0.0589378	0.0529555	0.0219371	0.0110884	0.0254206	0.0501991	0.0349513	0.0321084	0.0384585	0.0545125	0.00717526	0.0486089	0.0233281	0.0257454	0.0276704	0.0224642	0.0330118	0.0223638	0.0163344	0.0150567	0.00592888	0.0089878	0.0217852	0.0276191	0.00464815	0.00209312	0.0288093	0.00467495	0.00939289	0.0083488	0.0259792
14.5272	0.00768308	0.00325587	0.0174946	0.00988644	0.00633135	0.00235063	0.00566691	0.0138172	0.00604791	0.00512606	0.0224957	0.0459132	0.0954956	0.0759166	0.0670522	0.00380085	0.0499347	0.0509753	0.0606737	0.0542679	0.0228361	0.0115933	0.0262339	0.0516148	0.0360315	0.0331251	0.0395283	0.0561215	0.00751015	0.0499853	0.0240269	0.0265901	0.0283984	0.0231114	0.0338311	0.0229757	0.0168876	0.0155366	0.00615519	0.00933639	0.0224062	0.0284631	0.00484435	0.00218412	0.0296015	0.00486199	0.00971039	0.00864507	0.0267106
14.557	0.00796098	0.00340138	0.0180089	0.010234	0.00658415	0.00245448	0.00589429	0.0143168	0.00629352	0.00534921	0.023267	0.0473107	0.0976626	0.0781128	0.0689901	0.00401391	0.0511911	0.0525071	0.0624478	0.0556041	0.0237662	0.0121181	0.0270688	0.0530607	0.0371385	0.0341673	0.0406221	0.0577648	0.00785884	0.0513935	0.0247436	0.0274576	0.0291415	0.023775	0.034668	0.0236022	0.0174564	0.0160298	0.00638912	0.00969663	0.0230418	0.0293287	0.00504794	0.0022787	0.0304121	0.00505574	0.0100372	0.00895067	0.0274582
14.5868	0.00824755	0.00355271	0.0185352	0.010592	0.00684579	0.00256251	0.0061296	0.0148315	0.00654786	0.00558101	0.0240599	0.048741	0.0998585	0.0803541	0.0709666	0.00423784	0.0524708	0.0540754	0.0642602	0.0569641	0.0247281	0.0126632	0.0279256	0.0545368	0.0382727	0.0352352	0.04174	0.0594423	0.00822178	0.0528338	0.0254784	0.0283482	0.0299	0.0244553	0.0355228	0.0242435	0.0180411	0.0165364	0.00663088	0.0100688	0.0236923	0.0302163	0.00525916	0.00237699	0.0312413	0.0052564	0.0103734	0.00926583	0.0282222
14.6166	0.00854303	0.00371005	0.0190736	0.0109609	0.00711651	0.00267486	0.00637304	0.0153619	0.00681118	0.00582174	0.0248749	0.0502041	0.102083	0.0826405	0.0729818	0.00447311	0.053774	0.0556807	0.0661109	0.0583482	0.0257226	0.0132293	0.0288047	0.0560433	0.0394345	0.0363293	0.0428825	0.0611542	0.00859943	0.0543064	0.0262317	0.0292625	0.030674	0.0251527	0.0363957	0.0249	0.0186422	0.0170568	0.00688067	0.0104533	0.0243578	0.0311261	0.00547826	0.00247911	0.0320894	0.00546419	0.0107194	0.00959081	0.0290029
14.6464	0.00884761	0.0038736	0.0196244	0.0113409	0.00739656	0.00279168	0.00662484	0.0159081	0.00708373	0.00607167	0.0257123	0.0517003	0.104335	0.0849717	0.0750353	0.0047202	0.0551004	0.0573232	0.0679999	0.0597564	0.0267503	0.013817	0.0297062	0.0575804	0.040624	0.0374496	0.0440495	0.0629003	0.00899225	0.0558117	0.0270038	0.0302006	0.0314638	0.0258675	0.0372871	0.0255718	0.01926	0.0175912	0.00713872	0.0108503	0.0250387	0.0320586	0.00570548	0.0025852	0.0329567	0.00567933	0.0110754	0.00992584	0.0298003
14.6762	0.00916153	0.00404357	0.0201877	0.0117321	0.00768621	0.00291313	0.00688524	0.0164705	0.00736578	0.00633109	0.0265725	0.0532298	0.106614	0.0873475	0.077127	0.00497962	0.0564503	0.0590031	0.069927	0.0611887	0.0278118	0.0144267	0.0306306	0.0591479	0.0418415	0.0385966	0.0452414	0.0646807	0.00940072	0.05735	0.0277951	0.031163	0.0322694	0.0266001	0.0381972	0.0262593	0.0198949	0.0181399	0.00740525	0.0112601	0.025735	0.033014	0.00594108	0.00269538	0.0338435	0.00590202	0.0114415	0.0102712	0.0306147
14.706	0.00948501	0.00422017	0.0207638	0.012135	0.0079857	0.00303936	0.00715446	0.0170495	0.00765756	0.00660029	0.0274557	0.0547925	0.10892	0.0897677	0.0792566	0.00525189	0.0578235	0.0607208	0.0718923	0.0626454	0.0289079	0.0150593	0.0315781	0.0607461	0.0430874	0.0397705	0.0464584	0.0664952	0.00982531	0.0589217	0.0286059	0.03215	0.0330911	0.0273507	0.0391265	0.0269628	0.0205471	0.0187033	0.00768048	0.0116832	0.026447	0.0339928	0.00618534	0.0028098	0.0347502	0.00613251	0.0118181	0.0106271	0.0314462
14.7358	0.00981827	0.00440361	0.0213528	0.0125497	0.0082953	0.00317053	0.00743274	0.0176453	0.00795936	0.00687956	0.0283624	0.0563886	0.111252	0.0922318	0.0814238	0.00553755	0.05922	0.0624764	0.0738955	0.0641264	0.0300391	0.0157152	0.032549	0.062375	0.0443619	0.0409714	0.0477005	0.0683437	0.0102665	0.0605269	0.0294365	0.0331619	0.0339291	0.0281198	0.0400752	0.0276825	0.0212172	0.0192816	0.00796464	0.0121197	0.0271749	0.0349953	0.00643853	0.00292859	0.0356771	0.00637102	0.0122053	0.0109938	0.0322949
14.7656	0.0101615	0.00459413	0.0219548	0.0129766	0.00861528	0.00330682	0.00772031	0.0182583	0.00827144	0.00716922	0.0292929	0.0580181	0.11361	0.0947396	0.0836283	0.00583716	0.0606398	0.0642701	0.0759365	0.0656319	0.0312062	0.0163951	0.0335435	0.0640345	0.0456652	0.0421997	0.0489681	0.0702262	0.0107248	0.062166	0.0302874	0.0341991	0.0347835	0.0289077	0.0410436	0.0284186	0.0219055	0.019875	0.00825798	0.01257	0.027919	0.0360218	0.00670093	0.00305192	0.0366244	0.00661778	0.0126034	0.0113715	0.0331611
14.7954	0.0105151	0.00479193	0.0225702	0.0134158	0.00894591	0.00344839	0.00801743	0.0188888	0.00859407	0.00746956	0.0302475	0.0596811	0.115993	0.0972905	0.0858696	0.00615129	0.0620827	0.0661021	0.078015	0.0671621	0.0324096	0.0170995	0.0345619	0.0657247	0.0469975	0.0434554	0.0502611	0.0721424	0.0112007	0.0638392	0.0311589	0.035262	0.0356546	0.0297146	0.042032	0.0291715	0.0226124	0.020484	0.00856072	0.0130344	0.0286793	0.0370726	0.00697282	0.00317991	0.0375926	0.00687304	0.0130127	0.0117606	0.0340448
14.8252	0.0108791	0.00499727	0.0231991	0.0138677	0.00928747	0.00359543	0.00832434	0.0195371	0.00892752	0.0077809	0.0312265	0.0613774	0.1184	0.099884	0.0881474	0.00648052	0.0635487	0.0679725	0.0801306	0.068717	0.03365	0.0178293	0.0356045	0.0674456	0.0483591	0.0447389	0.0515798	0.0740921	0.0116947	0.0655467	0.0320513	0.0363507	0.0365425	0.0305411	0.0430408	0.0299413	0.0233383	0.0211087	0.00887311	0.0135133	0.029456	0.0381481	0.00725452	0.00331273	0.0385819	0.00713705	0.0134334	0.0121614	0.0349461
14.855	0.0112538	0.00521038	0.0238417	0.0143325	0.00964024	0.0037481	0.00864129	0.0202036	0.00927208	0.00810356	0.0322304	0.063107	0.120832	0.102519	0.0904612	0.00682546	0.0650377	0.0698814	0.0822829	0.0702968	0.0349281	0.0185849	0.0366714	0.069197	0.0497502	0.0460503	0.0529243	0.0760751	0.0122073	0.0672889	0.032965	0.0374656	0.0374474	0.0313873	0.0440701	0.0307285	0.0240836	0.0217495	0.00919539	0.0140069	0.0302494	0.0392485	0.00754631	0.00345053	0.0395927	0.00741005	0.0138658	0.012574	0.0358653
14.8848	0.0116395	0.00543149	0.0244982	0.0148106	0.0100045	0.00390661	0.00896854	0.0208885	0.00962803	0.00843786	0.0332592	0.0648699	0.123287	0.105196	0.0928105	0.00718672	0.0665496	0.0718289	0.0844716	0.0719017	0.0362442	0.019367	0.037763	0.070979	0.051171	0.0473896	0.0542948	0.0780911	0.0127391	0.069066	0.0339003	0.038607	0.0383696	0.0322537	0.0451204	0.0315332	0.0248488	0.0224067	0.00952782	0.0145156	0.0310597	0.040374	0.00784851	0.00359347	0.0406251	0.0076923	0.01431	0.0129987	0.0368024
14.9146	0.0120365	0.00566086	0.0251688	0.0153021	0.0103806	0.00407113	0.00930634	0.0215922	0.00999565	0.00878412	0.0343135	0.0666658	0.125764	0.107913	0.0951948	0.00756495	0.0680842	0.073815	0.0866962	0.0735318	0.0375991	0.0201762	0.0388794	0.0727913	0.0526216	0.0487572	0.0556912	0.0801399	0.0132905	0.0708781	0.0348578	0.0397752	0.0393091	0.0331405	0.0461918	0.0323556	0.0256342	0.0230805	0.00987065	0.0150397	0.0318869	0.0415251	0.00816145	0.00374172	0.0416797	0.00798406	0.0147665	0.0134359	0.0377575
14.9444	0.0124449	0.00589874	0.0258538	0.0158075	0.0107687	0.00424186	0.00965497	0.022315	0.0103752	0.00914269	0.0353934	0.0684946	0.128264	0.11067	0.0976134	0.00796081	0.0696413	0.0758397	0.0889561	0.0751873	0.0389931	0.0210132	0.0400208	0.074634	0.0541022	0.050153	0.0571138	0.0822211	0.013862	0.0727254	0.0358377	0.0409705	0.0402662	0.0340482	0.0472846	0.033196	0.0264404	0.0237714	0.0102241	0.0155796	0.0327312	0.0427019	0.00848546	0.00389545	0.0427566	0.00828559	0.0152354	0.0138858	0.0387308
14.9742	0.0128651	0.00614539	0.0265533	0.0163269	0.0111692	0.00441901	0.0100147	0.0230573	0.0107671	0.00951389	0.0364992	0.070356	0.130786	0.113466	0.100066	0.00837494	0.0712209	0.0779029	0.0912506	0.0768683	0.0404267	0.0218787	0.0411874	0.0765069	0.055613	0.0515771	0.0585625	0.0843344	0.0144542	0.0746081	0.0368404	0.0421931	0.041241	0.034977	0.0483992	0.0340547	0.0272678	0.0244795	0.0105886	0.0161355	0.0335929	0.0439046	0.00882087	0.00405482	0.0438561	0.00859716	0.015717	0.0143487	0.0397223
15.0041	0.0132972	0.00640108	0.0272676	0.0168607	0.0115825	0.00460277	0.0103857	0.0238192	0.0111714	0.00989806	0.0376313	0.0722497	0.133328	0.116299	0.102551	0.00880805	0.0728226	0.0800046	0.0935791	0.0785752	0.0419004	0.0227732	0.0423794	0.0784097	0.0571541	0.0530297	0.0600376	0.0864794	0.0150675	0.0765263	0.0378662	0.0434432	0.0422337	0.0359273	0.0495356	0.0349319	0.0281168	0.0252052	0.0109641	0.0167078	0.0344719	0.0451335	0.00916803	0.00422	0.0449786	0.00891905	0.0162115	0.0148248	0.0407321
15.0339	0.0137417	0.00666607	0.0279968	0.0174091	0.0120087	0.00479337	0.0107685	0.0246012	0.0115887	0.0102956	0.0387897	0.0741754	0.135891	0.119169	0.105069	0.00926082	0.0744463	0.0821446	0.0959408	0.080308	0.0434147	0.0236975	0.0435969	0.0803423	0.0587257	0.0545108	0.0615389	0.0886556	0.0157026	0.0784802	0.0389157	0.0447212	0.0432445	0.0368994	0.0506942	0.0358278	0.028988	0.0259487	0.0113512	0.0172968	0.0353685	0.0463888	0.00952729	0.00439119	0.0461244	0.00925152	0.0167194	0.0153145	0.0417603
15.0637	0.0141986	0.00694065	0.0287413	0.0179725	0.0124482	0.00499101	0.0111631	0.0254035	0.012019	0.0107067	0.0399749	0.0761328	0.138474	0.122075	0.107619	0.00973398	0.0760917	0.0843228	0.0983349	0.0820671	0.0449698	0.0246521	0.04484	0.0823044	0.0603279	0.0560204	0.0630666	0.0908626	0.0163599	0.08047	0.0399892	0.0460271	0.0442736	0.0378936	0.0518751	0.0367426	0.0298817	0.0267105	0.01175	0.0179028	0.0362828	0.0476706	0.00989902	0.00456856	0.0472936	0.00959486	0.0172407	0.0158181	0.0428071
15.0935	0.0146684	0.00722508	0.0295011	0.0185512	0.0129014	0.00519592	0.0115699	0.0262264	0.0124628	0.0111319	0.0411869	0.0781214	0.141076	0.125014	0.110199	0.0102282	0.0777585	0.0865388	0.100761	0.0838526	0.0465661	0.0256377	0.0461089	0.0842959	0.0619607	0.0575584	0.0646206	0.0930999	0.0170399	0.0824955	0.0410869	0.0473612	0.045321	0.0389101	0.0530785	0.0376764	0.0307986	0.0274907	0.0121608	0.0185261	0.0372148	0.0489792	0.0102836	0.00475228	0.0484865	0.00994936	0.0177759	0.0163359	0.0438723
15.1233	0.0151512	0.00751966	0.0302767	0.0191454	0.0133685	0.00540832	0.0119892	0.0270703	0.0129204	0.0115715	0.0424261	0.0801407	0.143696	0.127986	0.11281	0.0107443	0.0794466	0.0887925	0.103217	0.0856648	0.048204	0.026655	0.0474037	0.0863163	0.0636243	0.059125	0.066201	0.095367	0.0177432	0.084557	0.0422095	0.0487237	0.046387	0.0399494	0.0543046	0.0386296	0.031739	0.0282896	0.0125839	0.0191672	0.0381647	0.0503145	0.0106814	0.00494256	0.0497035	0.0103153	0.0183252	0.016868	0.0449562
15.1531	0.0156474	0.00782468	0.0310681	0.0197554	0.0138499	0.00562844	0.0124212	0.0279354	0.0133919	0.0120258	0.0436925	0.0821903	0.146335	0.13099	0.115449	0.0112831	0.0811556	0.0910834	0.105702	0.0875039	0.0498836	0.0277046	0.0487245	0.0883655	0.0653187	0.06072	0.0678079	0.0976633	0.0184703	0.0866544	0.0433571	0.0501147	0.0474717	0.0410116	0.0555534	0.0396022	0.0327035	0.0291077	0.0130196	0.0198262	0.0391326	0.0516767	0.0110927	0.00513958	0.0509447	0.0106929	0.0188888	0.0174149	0.0460587
15.1829	0.0161573	0.00814043	0.0318755	0.0203816	0.0143459	0.00585652	0.0128664	0.028822	0.0138779	0.0124952	0.0449864	0.0842695	0.14899	0.134023	0.118117	0.0118451	0.0828851	0.0934112	0.108217	0.0893703	0.0516053	0.0287871	0.0500712	0.0904429	0.0670439	0.0623433	0.069441	0.0999883	0.0192216	0.0887877	0.0445302	0.0515344	0.0485751	0.042097	0.0568252	0.0405945	0.0336925	0.0299451	0.0134681	0.0205035	0.0401184	0.0530659	0.0115181	0.00534353	0.0522103	0.0110826	0.019467	0.0179768	0.0471799
15.2127	0.016681	0.00846721	0.0326993	0.0210241	0.0148569	0.00609281	0.0133248	0.0297303	0.0143784	0.0129801	0.0463079	0.0863777	0.151661	0.137084	0.120813	0.0124313	0.0846348	0.0957755	0.110758	0.0912641	0.0533691	0.0299032	0.051444	0.0925483	0.0688001	0.0639948	0.0711005	0.102341	0.0199976	0.0909568	0.0457291	0.0529828	0.0496974	0.0432058	0.0581199	0.0416065	0.0347067	0.0308022	0.0139298	0.0211994	0.0411222	0.054482	0.0119579	0.0055546	0.0535005	0.0114846	0.0200601	0.018554	0.0483197
15.2425	0.017219	0.00880533	0.0335396	0.0216834	0.0153831	0.00633754	0.0137969	0.0306607	0.014894	0.0134808	0.0476571	0.0885142	0.154349	0.140172	0.123535	0.0130424	0.0864043	0.0981756	0.113325	0.0931856	0.0551753	0.0310535	0.0528429	0.0946812	0.0705871	0.0656744	0.0727862	0.104721	0.0207989	0.0931617	0.0469543	0.05446	0.0508388	0.0443384	0.0594377	0.0426384	0.0357464	0.0316792	0.014405	0.0219143	0.0421441	0.0559251	0.0124124	0.005773	0.0548156	0.0118992	0.0206684	0.0191469	0.0494783
15.2723	0.0177715	0.0091551	0.0343967	0.0223598	0.015925	0.00659097	0.014283	0.0316133	0.0154247	0.0139976	0.0490342	0.0906784	0.15705	0.143284	0.126282	0.0136793	0.0881933	0.100611	0.115917	0.095135	0.0570238	0.0322386	0.0542678	0.0968412	0.0724051	0.0673818	0.0744981	0.107128	0.0216259	0.0954021	0.048206	0.0559661	0.0519992	0.0454948	0.0607785	0.0436902	0.0368122	0.0325764	0.0148939	0.0226483	0.0431841	0.0573952	0.0128822	0.00599892	0.0561556	0.0123267	0.0212922	0.0197556	0.0506555
15.3021	0.0183387	0.00951684	0.0352707	0.0230533	0.0164828	0.00685335	0.0147833	0.0325885	0.0159711	0.014531	0.0504391	0.0928694	0.159766	0.146418	0.129054	0.0143426	0.0900014	0.103081	0.118533	0.0971126	0.0589147	0.033459	0.0557187	0.0990277	0.0742538	0.069117	0.076236	0.109561	0.0224792	0.0976779	0.0494845	0.0575011	0.0531787	0.0466753	0.0621423	0.0447622	0.0379046	0.0334941	0.0153969	0.0234019	0.0442422	0.058892	0.0133676	0.00623257	0.0575206	0.0127673	0.0219317	0.0203805	0.0518514
15.3319	0.018921	0.00989086	0.0361618	0.0237645	0.0170568	0.00712494	0.0152982	0.0335865	0.0165332	0.0150814	0.051872	0.0950864	0.162494	0.149573	0.131848	0.0150332	0.0918279	0.105585	0.12117	0.0991185	0.060848	0.0347154	0.0571956	0.10124	0.0761333	0.0708796	0.0779999	0.112019	0.023359	0.0999888	0.0507903	0.059065	0.0543773	0.04788	0.0635291	0.0458542	0.0390241	0.0344325	0.0159142	0.0241752	0.0453183	0.0604156	0.013869	0.00647414	0.0589109	0.0132215	0.0225871	0.0210218	0.053066
15.3617	0.0195187	0.0102775	0.0370702	0.0244935	0.0176475	0.00740602	0.0158279	0.0346074	0.0171116	0.015649	0.0533328	0.0973284	0.165234	0.152745	0.134665	0.015752	0.0936725	0.108122	0.123828	0.101153	0.0628236	0.0360084	0.0586983	0.103478	0.0780434	0.0726694	0.0797895	0.114501	0.024266	0.102334	0.0521236	0.0606577	0.0555952	0.049109	0.0649388	0.0469665	0.0401712	0.035392	0.0164461	0.0249686	0.0464125	0.0619658	0.0143869	0.00672384	0.0603263	0.0136894	0.0232587	0.0216798	0.0542991
15.3915	0.020132	0.010677	0.0379961	0.0252406	0.0182551	0.00769684	0.0163727	0.0356516	0.0177063	0.0162342	0.0548216	0.0995946	0.167985	0.155934	0.137503	0.0164996	0.0955347	0.11069	0.126504	0.103216	0.0648413	0.0373384	0.0602268	0.105741	0.0799841	0.0744859	0.0816047	0.117007	0.0252005	0.104715	0.0534846	0.0622792	0.0568322	0.0503624	0.0663712	0.048099	0.0413463	0.0363728	0.0169931	0.0257823	0.0475245	0.0635423	0.0149216	0.00698186	0.0617671	0.0141714	0.0239469	0.0223548	0.0555508
15.4213	0.0207613	0.0110899	0.0389396	0.0260061	0.01888	0.00799769	0.016933	0.0367191	0.0183178	0.0168375	0.0563383	0.101884	0.170745	0.159135	0.14036	0.0172769	0.0974139	0.11329	0.129197	0.105308	0.0669009	0.038706	0.0617809	0.108028	0.081955	0.076329	0.0834453	0.119535	0.0261629	0.107129	0.0548736	0.0639294	0.0580883	0.0516404	0.0678261	0.0492517	0.0425499	0.037375	0.0175552	0.0266167	0.0486545	0.0651448	0.0154737	0.00724842	0.0632331	0.0146677	0.0246517	0.0230471	0.0568209
15.4511	0.0214068	0.0115163	0.039901	0.0267902	0.0195225	0.00830883	0.017509	0.0378103	0.0189463	0.017459	0.0578828	0.104195	0.173514	0.162348	0.143235	0.0180848	0.0993094	0.11592	0.131906	0.107429	0.0690022	0.0401118	0.0633604	0.110338	0.083956	0.0781981	0.085311	0.122084	0.0271536	0.109576	0.0562909	0.065608	0.0593634	0.0529428	0.0693034	0.0504246	0.0437824	0.038399	0.0181329	0.0274718	0.0498022	0.0667731	0.0160434	0.00752371	0.0647243	0.0151787	0.0253735	0.0237568	0.0581094
15.4809	0.0220687	0.0119567	0.0408802	0.0275931	0.0201829	0.00863055	0.0181011	0.0389252	0.019592	0.0180993	0.059455	0.106528	0.176289	0.165568	0.146126	0.018924	0.101221	0.118579	0.134628	0.109579	0.0711448	0.0415561	0.0649651	0.11267	0.0859868	0.0800929	0.0872014	0.124655	0.028173	0.112056	0.0577366	0.067315	0.0606574	0.0542697	0.0708028	0.0516176	0.0450443	0.039445	0.0187265	0.028348	0.0509675	0.0684269	0.0166313	0.00780793	0.0662407	0.0157046	0.0261124	0.0244842	0.0594161
15.5107	0.0227475	0.0124113	0.0418775	0.0284152	0.0208615	0.00896312	0.0187095	0.0400641	0.0202553	0.0187586	0.0610548	0.10888	0.179069	0.168794	0.149032	0.0197952	0.103147	0.121265	0.137361	0.111757	0.0733284	0.0430394	0.0665948	0.115025	0.0880471	0.0820128	0.0891164	0.127244	0.0292215	0.114568	0.0592109	0.06905	0.0619703	0.0556211	0.0723239	0.0528306	0.046336	0.0405131	0.0193363	0.0292456	0.0521503	0.0701056	0.0172377	0.00810128	0.0677822	0.0162457	0.0268686	0.0252296	0.0607409
15.5405	0.0234433	0.0128806	0.0428929	0.0292565	0.0215587	0.00930684	0.0193345	0.041227	0.0209365	0.0194373	0.062682	0.11125	0.181852	0.172022	0.151952	0.0206993	0.105088	0.123977	0.140105	0.113964	0.0755524	0.0445622	0.0682491	0.1174	0.0901365	0.0839572	0.0910555	0.129853	0.0302994	0.117111	0.0607139	0.0708127	0.0633017	0.0569968	0.0738664	0.0540636	0.0476577	0.0416035	0.0199625	0.0301646	0.0533503	0.0718088	0.0178631	0.00840396	0.0693484	0.0168023	0.0276424	0.0259931	0.0620837
15.5703	0.0241564	0.0133648	0.0439264	0.0301173	0.0222746	0.00966199	0.0199764	0.042414	0.0216357	0.0201358	0.0643363	0.113638	0.184637	0.175249	0.154883	0.0216371	0.107043	0.126713	0.142855	0.116199	0.0778164	0.0461247	0.0699277	0.119794	0.0922546	0.0859257	0.0930182	0.132478	0.0314069	0.119685	0.0622456	0.0726029	0.0646515	0.0583966	0.0754299	0.0553165	0.0490099	0.0427164	0.0206054	0.0311053	0.0545675	0.073536	0.0185078	0.00871617	0.0709394	0.0173746	0.028434	0.026775	0.0634442
15.6001	0.024887	0.0138643	0.0449781	0.0309978	0.0230097	0.0100289	0.0206355	0.0436253	0.0223532	0.0208542	0.0660174	0.116042	0.187422	0.178472	0.157824	0.0226092	0.10901	0.129472	0.145612	0.118463	0.0801196	0.0477272	0.0716303	0.122208	0.0944008	0.0879175	0.0950041	0.13512	0.0325444	0.122287	0.0638062	0.0744202	0.0660194	0.0598204	0.077014	0.056589	0.0503929	0.0438519	0.0212653	0.0320678	0.0558016	0.0752866	0.0191722	0.00903809	0.0725547	0.0179629	0.0292434	0.0275753	0.0648223
15.6299	0.0256355	0.0143795	0.0460479	0.031898	0.0237641	0.0104077	0.021312	0.0448609	0.0230892	0.021593	0.067725	0.11846	0.190204	0.181688	0.160772	0.0236163	0.110989	0.132252	0.148372	0.120754	0.0824616	0.0493702	0.0733565	0.124639	0.0965747	0.089932	0.0970127	0.137777	0.0337121	0.124918	0.0653956	0.076264	0.0674052	0.0612679	0.0786181	0.0578809	0.0518067	0.0450102	0.0219425	0.0330524	0.0570523	0.0770599	0.0198567	0.00936991	0.074194	0.0185674	0.0300708	0.0283943	0.0662177
15.6597	0.026402	0.0149107	0.0471359	0.0328183	0.0245382	0.0107989	0.0220063	0.0461209	0.0238441	0.0223524	0.0694587	0.120891	0.192981	0.184893	0.163726	0.0246593	0.11298	0.135051	0.151132	0.123073	0.0848414	0.0510536	0.0751057	0.127087	0.0987754	0.0919684	0.0990434	0.140448	0.0349102	0.127575	0.0670137	0.0781339	0.0688084	0.0627389	0.0802416	0.0591921	0.0532518	0.0461914	0.0226373	0.0340592	0.0583194	0.0788553	0.0205617	0.00971182	0.0758571	0.0191884	0.0309164	0.0292321	0.0676302
15.6895	0.0271868	0.0154583	0.048242	0.0337586	0.0253321	0.0112027	0.0227185	0.0474053	0.0246179	0.0231327	0.0712181	0.123334	0.195751	0.188084	0.166683	0.0257387	0.11498	0.137868	0.153892	0.125418	0.0872582	0.0527778	0.0768776	0.12955	0.101002	0.094026	0.101095	0.143131	0.0361389	0.130258	0.0686604	0.0800293	0.0702287	0.0642328	0.081884	0.0605223	0.0547282	0.0473954	0.02335	0.0350882	0.0596025	0.080672	0.0212874	0.010064	0.0775434	0.0198261	0.0317801	0.0300888	0.0690596
15.7193	0.02799	0.0160226	0.049366	0.0347191	0.0261461	0.0116193	0.023449	0.0487141	0.025411	0.0239343	0.0730027	0.125787	0.198511	0.191258	0.169642	0.0268553	0.11699	0.140698	0.156649	0.127788	0.0897112	0.0545428	0.0786716	0.132026	0.103255	0.0961037	0.103168	0.145825	0.0373984	0.132964	0.0703354	0.0819497	0.0716655	0.0657494	0.0835446	0.0618712	0.056236	0.0486225	0.0240807	0.0361396	0.0609013	0.0825091	0.0220343	0.0104266	0.0792525	0.0204807	0.0326622	0.0309645	0.0705054
15.7491	0.028812	0.016604	0.0505079	0.0356998	0.0269803	0.0120491	0.0241979	0.0500472	0.0262234	0.0247573	0.074812	0.128247	0.201258	0.19441	0.172599	0.0280095	0.119008	0.143542	0.159399	0.130184	0.0921994	0.0563485	0.0804871	0.134515	0.105532	0.0982008	0.105261	0.148529	0.0386887	0.135693	0.0720387	0.0838942	0.0731185	0.0672881	0.0852227	0.0632384	0.0577752	0.0498725	0.0248297	0.0372135	0.0622156	0.0843658	0.0228026	0.0107998	0.0809839	0.0211524	0.0335627	0.0318592	0.0719674
15.779	0.0296528	0.0172028	0.0516674	0.0367008	0.0278351	0.0124923	0.0249654	0.0514046	0.0270554	0.025602	0.0766453	0.130715	0.20399	0.197537	0.175551	0.029202	0.121033	0.146396	0.162142	0.132603	0.0947217	0.058195	0.0823234	0.137015	0.107833	0.100316	0.107373	0.15124	0.0400099	0.138442	0.0737697	0.0858622	0.074587	0.0688483	0.0869174	0.0646237	0.0593459	0.0511454	0.0255973	0.0383099	0.0635448	0.086241	0.0235925	0.0111838	0.0827368	0.0218415	0.0344815	0.032773	0.0734452
15.8088	0.0305127	0.0178193	0.0528443	0.037722	0.0287104	0.0129493	0.0257518	0.0527862	0.027907	0.0264687	0.078502	0.133187	0.206703	0.200635	0.178497	0.0304334	0.123064	0.149257	0.164873	0.135045	0.0972769	0.0600822	0.0841799	0.139525	0.110156	0.102449	0.109502	0.153959	0.0413621	0.141209	0.0755282	0.0878528	0.0760705	0.0704295	0.088628	0.0660266	0.0609479	0.0524412	0.0263836	0.0394288	0.0648886	0.0881338	0.0244044	0.0115786	0.0845107	0.0225481	0.0354188	0.0337059	0.0749383
15.8386	0.0313918	0.018454	0.0540384	0.0387635	0.0296066	0.0134203	0.0265573	0.0541919	0.0287786	0.0273575	0.0803814	0.135663	0.209394	0.2037	0.181433	0.0317039	0.125099	0.152123	0.167592	0.137508	0.0998639	0.0620097	0.0860559	0.142042	0.112501	0.104598	0.111649	0.156682	0.0427453	0.143992	0.0773137	0.0898651	0.0775683	0.072031	0.0903535	0.0674467	0.062581	0.0537598	0.0271889	0.0405703	0.0662466	0.090043	0.0252385	0.0119845	0.0863049	0.0232723	0.0363743	0.0346577	0.0764465
15.8684	0.0322902	0.0191071	0.0552494	0.0398252	0.0305236	0.0139055	0.0273821	0.0556215	0.0296701	0.0282687	0.0822827	0.138139	0.21206	0.206728	0.184356	0.0330143	0.127137	0.154992	0.170295	0.139991	0.102481	0.0639773	0.0879506	0.144565	0.114866	0.106762	0.113812	0.159409	0.0441593	0.14679	0.0791256	0.0918982	0.0790796	0.073652	0.0920931	0.0688836	0.064245	0.0551011	0.0280133	0.0417343	0.0676183	0.0919676	0.0260949	0.0124016	0.0881184	0.0240143	0.0373482	0.0356285	0.0779691
15.8982	0.0332081	0.019779	0.0564768	0.0409069	0.0314615	0.0144053	0.0282262	0.0570747	0.0305818	0.0292024	0.084205	0.140615	0.214696	0.209714	0.187263	0.0343646	0.129178	0.157859	0.172979	0.142493	0.105128	0.0659846	0.0898632	0.147092	0.117249	0.108939	0.11599	0.162137	0.0456041	0.149599	0.0809633	0.0939511	0.0806037	0.0752917	0.0938456	0.0703367	0.0659396	0.0564648	0.0288571	0.0429208	0.0690033	0.0939062	0.0269739	0.0128301	0.0899506	0.0247743	0.0383403	0.0366181	0.0795058
15.928	0.0341455	0.0204701	0.0577204	0.0420087	0.0324204	0.0149199	0.0290899	0.0585514	0.0315136	0.0301587	0.0861475	0.143088	0.2173	0.212655	0.190151	0.0357554	0.131219	0.160723	0.175642	0.14501	0.107801	0.068031	0.0917928	0.149622	0.119651	0.111129	0.118181	0.164864	0.0470796	0.152417	0.0828261	0.0960225	0.0821399	0.0769492	0.0956102	0.0718056	0.0676645	0.0578508	0.0297202	0.0441297	0.0704009	0.0958575	0.0278755	0.0132699	0.0918003	0.0255523	0.0393506	0.0376264	0.081056
15.9578	0.0351026	0.0211806	0.0589797	0.0431302	0.0334004	0.0154496	0.0299733	0.0600513	0.0324657	0.0311378	0.0881091	0.145557	0.219868	0.215547	0.193016	0.0371868	0.133259	0.16358	0.178282	0.147542	0.110501	0.0701161	0.0937385	0.152152	0.122068	0.11333	0.120384	0.16759	0.0485855	0.155241	0.0847132	0.0981113	0.0836871	0.0786237	0.0973856	0.0732896	0.069419	0.0592588	0.030603	0.0453609	0.0718107	0.0978203	0.0287999	0.0137213	0.0936667	0.0263485	0.0403787	0.0386533	0.082619
15.9876	0.0360794	0.0219109	0.0602542	0.0442713	0.0344014	0.0159945	0.0308765	0.0615741	0.0334381	0.0321398	0.0900889	0.148019	0.222394	0.218385	0.195855	0.0386591	0.135297	0.166427	0.180895	0.150086	0.113225	0.0722391	0.0956994	0.15468	0.124499	0.11554	0.122598	0.170311	0.0501216	0.158069	0.0866237	0.100216	0.0852445	0.0803139	0.0991708	0.0747882	0.0712026	0.0606884	0.0315054	0.0466143	0.0732321	0.099793	0.0297472	0.0141842	0.0955487	0.0271628	0.0414247	0.0396984	0.0841944
16.0174	0.0370759	0.0226613	0.0615433	0.0454318	0.0354234	0.016555	0.0317995	0.0631193	0.0344309	0.0331647	0.0920857	0.150472	0.224876	0.221165	0.198664	0.0401722	0.13733	0.16926	0.18348	0.15264	0.115972	0.0743992	0.0976744	0.157204	0.126943	0.117759	0.124822	0.173026	0.0516876	0.160898	0.0885566	0.102336	0.0868111	0.082019	0.100964	0.0763008	0.0730147	0.0621394	0.0324275	0.0478897	0.0746645	0.101774	0.0307173	0.0146589	0.0974451	0.0279955	0.0424882	0.0407615	0.0857814
16.0472	0.0380922	0.0234322	0.0628466	0.0466113	0.0364662	0.0171313	0.0327424	0.0646866	0.035444	0.0342126	0.0940984	0.152913	0.227309	0.223882	0.201439	0.0417263	0.139357	0.172076	0.186032	0.155202	0.118739	0.0765955	0.0996624	0.159722	0.129397	0.119983	0.127052	0.175732	0.0532832	0.163724	0.0905109	0.104469	0.0883859	0.0837377	0.102765	0.0778266	0.0748546	0.0636114	0.0333694	0.0491869	0.0761072	0.103762	0.0317103	0.0151454	0.0993548	0.0288464	0.0435691	0.0418424	0.0873795
16.077	0.0391282	0.0242237	0.0641634	0.0478096	0.0375299	0.0177236	0.0337054	0.0662755	0.0364775	0.0352836	0.0961258	0.155342	0.229689	0.226533	0.204177	0.0433213	0.141377	0.174871	0.18855	0.157768	0.121525	0.078827	0.101662	0.162231	0.131861	0.122213	0.129289	0.178427	0.0549079	0.166545	0.0924854	0.106614	0.0899677	0.0854689	0.104572	0.079365	0.0767213	0.0651038	0.0343312	0.0505057	0.0775597	0.105756	0.0327261	0.0156436	0.101276	0.0297156	0.0446671	0.0429406	0.0889878
16.1068	0.0401839	0.0250363	0.0654931	0.0490262	0.0386142	0.018332	0.0346883	0.0678856	0.0375313	0.0363775	0.0981665	0.157756	0.23201	0.229112	0.206873	0.0449571	0.143388	0.177642	0.19103	0.160337	0.124327	0.0810924	0.103673	0.16473	0.134331	0.124445	0.13153	0.181109	0.0565612	0.169356	0.0944788	0.108769	0.0915555	0.0872112	0.106384	0.0809153	0.078614	0.0666162	0.0353128	0.0518458	0.0790212	0.107753	0.0337646	0.0161538	0.103209	0.0306031	0.0457817	0.0440558	0.0906058
16.1366	0.0412593	0.02587	0.0668349	0.0502608	0.0397191	0.0189568	0.0356912	0.0695161	0.0386053	0.0374943	0.100219	0.160151	0.23427	0.231617	0.209523	0.0466333	0.145388	0.180385	0.19347	0.162904	0.127144	0.0833906	0.105694	0.167215	0.136806	0.126679	0.133773	0.183775	0.0582427	0.172155	0.0964897	0.110933	0.093148	0.0889633	0.108198	0.0824766	0.0805317	0.068148	0.0363141	0.053207	0.0804911	0.109752	0.0348257	0.0166758	0.105151	0.0315088	0.0469128	0.0451875	0.0922325
16.1664	0.0423542	0.0267253	0.0681882	0.051513	0.0408441	0.0195981	0.036714	0.0711666	0.0396996	0.038634	0.102283	0.162526	0.236462	0.234042	0.212124	0.0483498	0.147374	0.183097	0.195867	0.165468	0.129972	0.0857203	0.107723	0.169684	0.139283	0.128912	0.136016	0.186423	0.0599517	0.174938	0.0985166	0.113104	0.0947441	0.0907238	0.110015	0.0840482	0.0824733	0.0696986	0.0373353	0.0545888	0.0819686	0.111751	0.0359093	0.0172097	0.1071	0.0324326	0.04806	0.0463353	0.0938672
16.1962	0.0434686	0.0276024	0.0695522	0.0527822	0.0419892	0.0202561	0.0377567	0.0728363	0.0408139	0.0397965	0.104355	0.164879	0.238583	0.236384	0.21467	0.050106	0.149346	0.185772	0.198218	0.168024	0.132811	0.0880798	0.109758	0.172135	0.141761	0.131142	0.138258	0.18905	0.0616877	0.177702	0.100558	0.11528	0.0963424	0.0924914	0.111831	0.0856292	0.0844375	0.0712675	0.038376	0.0559909	0.083453	0.113749	0.037015	0.0177555	0.109056	0.0333745	0.0492227	0.0474986	0.095509
16.226	0.0446023	0.0285014	0.070926	0.0540678	0.043154	0.020931	0.0388193	0.0745246	0.0419483	0.0409815	0.106435	0.167207	0.240627	0.238639	0.217158	0.0519014	0.1513	0.188409	0.200521	0.170569	0.135657	0.0904675	0.1118	0.174564	0.144237	0.133367	0.140496	0.191653	0.0634499	0.180442	0.102612	0.11746	0.0979416	0.0942644	0.113647	0.0872187	0.0864231	0.0728538	0.0394364	0.057413	0.0849435	0.115742	0.0381427	0.0183133	0.111017	0.0343343	0.0504007	0.048677	0.0971571
16.2558	0.0457551	0.0294225	0.0723088	0.0553694	0.0443381	0.0216228	0.0399015	0.0762307	0.0431024	0.0421889	0.108521	0.169508	0.242591	0.240801	0.219585	0.0537353	0.153236	0.191001	0.202773	0.173101	0.138507	0.0928819	0.113846	0.176969	0.146708	0.135586	0.142728	0.194229	0.0652375	0.183155	0.104677	0.11964	0.0995405	0.0960414	0.115459	0.088816	0.0884287	0.0744568	0.0405161	0.0588546	0.0864393	0.117731	0.039292	0.0188828	0.112981	0.0353119	0.0515933	0.0498697	0.0988105
16.2856	0.046927	0.030366	0.0736998	0.0566863	0.0455412	0.0223317	0.0410033	0.0779537	0.0442762	0.0434185	0.110612	0.171779	0.244469	0.242869	0.221944	0.0556071	0.15515	0.193547	0.20497	0.175615	0.141359	0.095321	0.115895	0.179347	0.149172	0.137796	0.144952	0.196775	0.0670497	0.185837	0.106751	0.12182	0.101138	0.0978207	0.117268	0.09042	0.0904528	0.0760758	0.0416151	0.0603152	0.0879396	0.119712	0.0404626	0.0194642	0.114947	0.036307	0.0528002	0.0510761	0.100468
16.3154	0.0481176	0.0313319	0.075098	0.0580179	0.0467629	0.0230577	0.0421245	0.0796927	0.0454694	0.04467	0.112705	0.174017	0.246256	0.244837	0.224233	0.0575158	0.157041	0.196041	0.207111	0.178107	0.144211	0.0977828	0.117946	0.181696	0.151626	0.139995	0.147165	0.199288	0.0688857	0.188484	0.108833	0.123998	0.102731	0.0996008	0.11907	0.0920297	0.092494	0.0777098	0.0427331	0.0617943	0.0894435	0.121683	0.0416541	0.0200574	0.116913	0.0373194	0.0540208	0.0522955	0.10213
16.3452	0.0493267	0.0323203	0.0765024	0.0593634	0.0480026	0.0238009	0.0432649	0.0814468	0.0466819	0.0459431	0.114799	0.17622	0.247948	0.246702	0.226447	0.0594605	0.158907	0.19848	0.209192	0.180574	0.147058	0.100265	0.119997	0.184011	0.154068	0.14218	0.149365	0.201765	0.0707444	0.191092	0.110919	0.12617	0.104321	0.10138	0.120864	0.0936443	0.0945505	0.079358	0.0438698	0.0632914	0.0909501	0.123643	0.042866	0.0206622	0.118877	0.0383488	0.0552544	0.0535273	0.103794
16.375	0.0505541	0.0333313	0.0779122	0.0607221	0.04926	0.0245613	0.0444243	0.083215	0.0479134	0.0472374	0.116893	0.178386	0.24954	0.24846	0.228581	0.0614401	0.160746	0.200859	0.211211	0.183011	0.149899	0.102766	0.122046	0.186291	0.156495	0.14435	0.151551	0.204202	0.0726249	0.193657	0.113007	0.128336	0.105904	0.103156	0.12265	0.0952626	0.0966207	0.0810195	0.0450251	0.0648058	0.0924587	0.125589	0.0440979	0.0212787	0.120837	0.039395	0.0565006	0.0547706	0.105459
16.4048	0.0517995	0.034365	0.0793262	0.0620933	0.0505344	0.025339	0.0456024	0.0849963	0.0491636	0.0485526	0.118983	0.180511	0.251028	0.250109	0.230633	0.0634533	0.162554	0.203176	0.213165	0.185416	0.15273	0.105284	0.124092	0.188532	0.158905	0.146503	0.153718	0.206596	0.0745262	0.196174	0.115096	0.130493	0.107479	0.104928	0.124424	0.0968837	0.0987028	0.0826932	0.0461987	0.0663371	0.0939682	0.127519	0.0453492	0.0219066	0.122792	0.0404576	0.0577586	0.0560247	0.107125
16.4346	0.0530625	0.0354214	0.0807436	0.0634762	0.0518253	0.026134	0.046799	0.0867894	0.0504322	0.0498882	0.12107	0.182594	0.252407	0.251645	0.232598	0.0654988	0.164331	0.205425	0.215051	0.187783	0.155548	0.107815	0.126134	0.190731	0.161295	0.148635	0.155866	0.208943	0.076447	0.198641	0.117183	0.132638	0.109045	0.106694	0.126185	0.0985065	0.100795	0.0843781	0.0473901	0.0678845	0.0954778	0.129432	0.0466194	0.0225459	0.12474	0.0415362	0.0590278	0.0572887	0.10879
16.4644	0.0543429	0.0365004	0.0821631	0.0648699	0.0531321	0.0269462	0.0480138	0.0885933	0.0517189	0.0512438	0.123149	0.184632	0.253673	0.253064	0.234472	0.0675751	0.166074	0.207604	0.216868	0.190108	0.158349	0.110357	0.128169	0.192885	0.163661	0.150746	0.157992	0.21124	0.0783861	0.201052	0.119266	0.13477	0.110601	0.108452	0.127932	0.10013	0.102895	0.0860731	0.0485991	0.0694474	0.0969864	0.131324	0.0479078	0.0231964	0.126679	0.0426305	0.0603076	0.0585617	0.110453
16.4942	0.0556401	0.0376019	0.0835838	0.0662735	0.054454	0.0277755	0.0492463	0.0904067	0.0530233	0.0526188	0.125221	0.186621	0.254822	0.254365	0.236251	0.0696807	0.167781	0.209708	0.218612	0.192388	0.16113	0.112908	0.130197	0.194991	0.166001	0.152831	0.160092	0.213482	0.0803425	0.203405	0.121341	0.136885	0.112144	0.1102	0.129663	0.101753	0.105002	0.0877772	0.0498252	0.071025	0.0984933	0.133195	0.0492138	0.023858	0.128607	0.04374	0.0615972	0.0598428	0.112114
16.524	0.0569539	0.0387258	0.0850046	0.0676862	0.0557904	0.0286218	0.0504964	0.0922284	0.0543451	0.0540126	0.127282	0.188561	0.255849	0.255543	0.237931	0.0718138	0.169449	0.211733	0.220281	0.194618	0.163889	0.115466	0.132215	0.197045	0.168313	0.154889	0.162165	0.215667	0.0823146	0.205694	0.123406	0.138983	0.113673	0.111937	0.131375	0.103374	0.107112	0.0894891	0.051068	0.0726166	0.0999974	0.135041	0.0505367	0.0245304	0.130522	0.0448642	0.0628959	0.0611312	0.113771
16.5539	0.0582839	0.039872	0.0864244	0.069107	0.0571406	0.0294852	0.0517635	0.094057	0.0556839	0.0554248	0.129331	0.190447	0.256751	0.256598	0.23951	0.0739726	0.171077	0.213677	0.221874	0.196795	0.16662	0.118026	0.134222	0.199045	0.170594	0.156918	0.164209	0.21779	0.0843012	0.207916	0.125459	0.14106	0.115188	0.113661	0.133068	0.104993	0.109225	0.0912078	0.0523272	0.0742214	0.101498	0.136861	0.0518757	0.0252136	0.132422	0.0460026	0.0642029	0.0624258	0.115422
16.5837	0.0596295	0.0410403	0.0878421	0.070535	0.0585037	0.0303653	0.0530473	0.0958912	0.0570393	0.0568545	0.131366	0.192277	0.257524	0.257526	0.240984	0.0761551	0.172662	0.215535	0.223386	0.198913	0.169321	0.120588	0.136217	0.200988	0.17284	0.158916	0.16622	0.219848	0.0863009	0.210067	0.127496	0.143114	0.116685	0.115369	0.13474	0.106607	0.111337	0.0929318	0.0536021	0.0758386	0.102993	0.138652	0.0532301	0.0259074	0.134305	0.0471546	0.0655175	0.0637257	0.117068
16.6135	0.0609904	0.0422304	0.0892565	0.0719692	0.0598789	0.0312621	0.0543473	0.0977295	0.0584108	0.0583013	0.133385	0.19405	0.258165	0.258325	0.24235	0.0783593	0.174202	0.217305	0.224818	0.200969	0.171988	0.123146	0.138197	0.20287	0.175049	0.160879	0.168196	0.221837	0.0883121	0.212144	0.129515	0.145142	0.118164	0.11706	0.136388	0.108217	0.113448	0.09466	0.0548923	0.0774673	0.104483	0.140413	0.0545989	0.0266115	0.136169	0.0483197	0.0668388	0.0650299	0.118707
16.6433	0.062366	0.0434419	0.0906665	0.0734087	0.0612655	0.0321754	0.055663	0.0995706	0.0597979	0.0597642	0.135385	0.195762	0.25867	0.258994	0.243604	0.080583	0.175696	0.218983	0.226165	0.202959	0.174617	0.1257	0.140161	0.204688	0.177218	0.162806	0.170134	0.223752	0.0903335	0.214142	0.131513	0.147143	0.119622	0.118733	0.138011	0.10982	0.115553	0.0963912	0.0561973	0.0791068	0.105966	0.142141	0.0559815	0.0273256	0.138013	0.0494973	0.068166	0.0663373	0.120337
16.6731	0.0637557	0.0446747	0.092071	0.0748524	0.0626626	0.0331049	0.056994	0.101413	0.0612001	0.0612426	0.137365	0.197411	0.259037	0.259532	0.244745	0.0828239	0.17714	0.220566	0.227427	0.204878	0.177205	0.128246	0.142107	0.206439	0.179345	0.164694	0.172033	0.225591	0.0923633	0.216058	0.133487	0.149114	0.121059	0.120385	0.139608	0.111416	0.117652	0.0981239	0.0575164	0.080756	0.107441	0.143834	0.0573768	0.0280496	0.139834	0.0506866	0.0694983	0.0676469	0.121957
16.7029	0.0651592	0.0459282	0.0934689	0.0762993	0.0640692	0.0340504	0.0583397	0.103255	0.062617	0.0627357	0.139323	0.198995	0.259263	0.259936	0.245769	0.0850796	0.178534	0.222052	0.228601	0.206724	0.179748	0.13078	0.144033	0.208121	0.181427	0.166541	0.17389	0.227348	0.0944001	0.217888	0.135434	0.151053	0.122474	0.122015	0.141176	0.113004	0.119742	0.0998569	0.0588492	0.0824141	0.108907	0.14549	0.058784	0.0287833	0.141631	0.0518871	0.0708347	0.0689578	0.123567
16.7327	0.0665758	0.047202	0.0948591	0.0777483	0.0654844	0.0350117	0.0596996	0.105095	0.064048	0.0642427	0.141257	0.200512	0.259347	0.260206	0.246674	0.0873476	0.179875	0.223437	0.229687	0.208492	0.182242	0.133299	0.145938	0.209731	0.18346	0.168345	0.175703	0.229022	0.0964422	0.21963	0.137351	0.152956	0.123863	0.123622	0.142714	0.114581	0.12182	0.101589	0.0601949	0.0840801	0.110364	0.147107	0.0602021	0.0295263	0.143402	0.053098	0.0721746	0.0702688	0.125165
16.7625	0.0680049	0.0484958	0.0962403	0.0791985	0.0669073	0.0359884	0.0610732	0.106932	0.0654924	0.0657626	0.143165	0.201959	0.259285	0.260341	0.247459	0.0896253	0.181161	0.224719	0.230681	0.210178	0.184684	0.135802	0.14782	0.211265	0.185444	0.170104	0.177469	0.230608	0.0984878	0.221279	0.139236	0.154823	0.125227	0.125202	0.144221	0.116148	0.123885	0.103318	0.061553	0.085753	0.111809	0.148684	0.0616301	0.0302784	0.145144	0.0543186	0.0735169	0.0715788	0.126751
16.7923	0.0694459	0.0498089	0.0976116	0.0806488	0.068337	0.0369802	0.0624597	0.108764	0.0669499	0.0672946	0.145044	0.203334	0.259076	0.260341	0.248122	0.09191	0.182391	0.225895	0.231583	0.211779	0.187069	0.138283	0.149678	0.212722	0.187374	0.171816	0.179186	0.232103	0.100535	0.222834	0.141085	0.156651	0.126563	0.126756	0.145694	0.117703	0.125934	0.105044	0.0629228	0.0874319	0.113243	0.150217	0.0630671	0.0310393	0.146855	0.0555481	0.0748608	0.0728869	0.128322
16.8221	0.0708983	0.0511407	0.0989718	0.0820981	0.0697725	0.0379868	0.0638587	0.110589	0.0684196	0.0688377	0.146893	0.204637	0.25872	0.260206	0.24866	0.094199	0.183562	0.226965	0.232391	0.213292	0.189395	0.140742	0.151509	0.214098	0.189249	0.173478	0.180852	0.233503	0.102583	0.22429	0.142895	0.158437	0.127871	0.128281	0.147132	0.119244	0.127965	0.106764	0.0643036	0.0891157	0.114664	0.151707	0.0645119	0.0318087	0.148535	0.0567857	0.0762053	0.0741919	0.129878
16.8519	0.0723613	0.0524908	0.10032	0.0835455	0.0712127	0.0390078	0.0652694	0.112406	0.0699011	0.070391	0.14871	0.205863	0.258215	0.259935	0.249074	0.0964894	0.184674	0.227925	0.233104	0.214714	0.191657	0.143173	0.153312	0.215391	0.191067	0.17509	0.182465	0.234805	0.104629	0.225647	0.144665	0.16018	0.129148	0.129775	0.148534	0.12077	0.129975	0.108477	0.0656948	0.0908034	0.116071	0.153149	0.0659635	0.0325864	0.150181	0.0580307	0.0775497	0.0754929	0.131418
16.8817	0.0738344	0.0538584	0.101655	0.0849899	0.0726568	0.0400429	0.0666913	0.114214	0.0713936	0.0719535	0.150494	0.207013	0.257562	0.259529	0.249361	0.0987783	0.185725	0.228774	0.233721	0.216041	0.193853	0.145575	0.155086	0.216599	0.192825	0.176648	0.184022	0.236006	0.106672	0.2269	0.14639	0.161877	0.130394	0.131238	0.149898	0.122281	0.131962	0.110183	0.0670955	0.092494	0.117463	0.154544	0.0674209	0.033372	0.151792	0.0592821	0.0788929	0.0767887	0.132941
16.9115	0.0753168	0.0552429	0.102975	0.0864302	0.0741036	0.0410916	0.0681236	0.11601	0.0728966	0.0735241	0.152241	0.208085	0.25676	0.258988	0.249521	0.101063	0.186713	0.229511	0.234241	0.217271	0.195979	0.147943	0.156828	0.217721	0.19452	0.178151	0.185523	0.237104	0.108709	0.228048	0.148069	0.163526	0.131607	0.132668	0.151223	0.123775	0.133925	0.111878	0.0685051	0.0941864	0.118839	0.155889	0.0688829	0.0341652	0.153365	0.0605393	0.0802342	0.0780783	0.134445
16.9413	0.076808	0.0566436	0.10428	0.0878655	0.0755523	0.0421536	0.0695657	0.117794	0.0744092	0.075102	0.153951	0.209076	0.255809	0.258315	0.249555	0.10334	0.187637	0.230135	0.234663	0.218401	0.198031	0.150276	0.158538	0.218753	0.196151	0.179597	0.186964	0.238096	0.11074	0.229089	0.1497	0.165125	0.132786	0.134063	0.152507	0.125251	0.13586	0.113563	0.0699228	0.0958795	0.120198	0.157183	0.0703485	0.0349656	0.154899	0.0618012	0.0815725	0.0793608	0.135931
16.9711	0.0783071	0.0580597	0.105569	0.0892947	0.0770017	0.0432283	0.0710168	0.119563	0.0759309	0.076686	0.155622	0.209987	0.254712	0.257508	0.249461	0.105607	0.188496	0.230644	0.234988	0.219429	0.200007	0.15257	0.160213	0.219694	0.197717	0.180986	0.188345	0.23898	0.112762	0.230021	0.151279	0.166673	0.13393	0.135422	0.153749	0.126708	0.137766	0.115236	0.0713478	0.0975722	0.121539	0.158424	0.0718166	0.0357731	0.156393	0.0630671	0.082907	0.0806351	0.137395
17.0009	0.0798134	0.0594905	0.106841	0.0907169	0.078451	0.0443154	0.0724763	0.121316	0.077461	0.078275	0.157252	0.210815	0.253468	0.256571	0.24924	0.10786	0.189288	0.231038	0.235213	0.220354	0.201904	0.154822	0.161852	0.220543	0.199214	0.182315	0.189664	0.239753	0.114773	0.230843	0.152804	0.168168	0.135038	0.136745	0.154947	0.128145	0.13964	0.116895	0.0727794	0.0992636	0.122861	0.15961	0.0732861	0.0365872	0.157845	0.0643362	0.0842368	0.0819003	0.138839
17.0307	0.0813264	0.0609352	0.108094	0.0921311	0.0798992	0.0454144	0.0739433	0.123052	0.0789986	0.0798681	0.158839	0.21156	0.252079	0.255506	0.248892	0.110096	0.190013	0.231317	0.235339	0.221173	0.203717	0.15703	0.163454	0.221298	0.200642	0.183583	0.190919	0.240414	0.116771	0.231553	0.154275	0.169607	0.136108	0.138029	0.156101	0.12956	0.141481	0.118538	0.0742168	0.100952	0.124164	0.160742	0.0747558	0.0374077	0.159254	0.0656074	0.085561	0.0831553	0.14026
17.0605	0.0828451	0.062393	0.109329	0.0935364	0.0813452	0.0465248	0.0754173	0.124769	0.0805431	0.0814641	0.160382	0.21222	0.250549	0.254313	0.248419	0.112313	0.19067	0.23148	0.235366	0.221884	0.205446	0.15919	0.165017	0.221959	0.201999	0.184789	0.192108	0.24096	0.118756	0.23215	0.155687	0.17099	0.137141	0.139275	0.15721	0.130953	0.143286	0.120165	0.0756592	0.102638	0.125446	0.161816	0.0762247	0.0382341	0.160617	0.06688	0.0868789	0.0843994	0.141658
17.0903	0.084369	0.063863	0.110543	0.0949319	0.0827882	0.0476461	0.0768973	0.126466	0.0820936	0.0830619	0.16188	0.212797	0.248879	0.252996	0.247821	0.114507	0.191258	0.231528	0.235294	0.222488	0.207088	0.1613	0.16654	0.222523	0.203284	0.185932	0.193232	0.241392	0.120724	0.232634	0.15704	0.172314	0.138135	0.14048	0.158272	0.132323	0.145054	0.121775	0.0771058	0.104318	0.126706	0.162833	0.0776917	0.0390662	0.161935	0.0681531	0.0881894	0.0856315	0.143032
17.1201	0.0858972	0.0653444	0.111737	0.0963168	0.0842271	0.0487778	0.0783827	0.128141	0.0836496	0.0846605	0.16333	0.213288	0.247072	0.251556	0.247099	0.116676	0.191777	0.231462	0.235123	0.222982	0.208639	0.163358	0.168021	0.222991	0.204494	0.18701	0.194287	0.241707	0.122675	0.233003	0.158333	0.173579	0.139088	0.141645	0.159286	0.133668	0.146783	0.123365	0.0785559	0.105993	0.127944	0.163791	0.0791556	0.0399037	0.163205	0.0694258	0.0894919	0.086851	0.144381
17.1499	0.087429	0.0668363	0.112909	0.0976901	0.0856612	0.0499195	0.0798727	0.129793	0.0852101	0.0862588	0.164733	0.213694	0.245132	0.249998	0.246256	0.118816	0.192226	0.231281	0.234854	0.223366	0.210098	0.165361	0.16946	0.223361	0.20563	0.188024	0.195274	0.241906	0.124606	0.233259	0.159563	0.174783	0.140002	0.142768	0.160252	0.134988	0.148471	0.124934	0.0800085	0.107661	0.129158	0.164689	0.0806154	0.0407462	0.164427	0.0706973	0.0907855	0.0880568	0.145704
17.1797	0.0889637	0.068338	0.114059	0.0990512	0.0870894	0.0510707	0.0813665	0.13142	0.0867745	0.0878557	0.166085	0.214014	0.243063	0.248323	0.245293	0.120924	0.192604	0.230987	0.234487	0.22364	0.211464	0.167306	0.170854	0.223634	0.20669	0.188971	0.196192	0.241987	0.126515	0.2334	0.16073	0.175924	0.140874	0.143849	0.161169	0.136281	0.150117	0.126482	0.0814629	0.109322	0.130348	0.165527	0.08207	0.0415934	0.165599	0.0719668	0.0920694	0.0892484	0.147001
17.2095	0.0905005	0.0698485	0.115186	0.100399	0.088511	0.0522308	0.0828633	0.133023	0.0883419	0.0894502	0.167387	0.214249	0.240868	0.246536	0.244213	0.122997	0.192913	0.230581	0.234024	0.223804	0.212734	0.169192	0.172203	0.22381	0.207673	0.189852	0.197039	0.24195	0.128402	0.233427	0.161832	0.177003	0.141704	0.144887	0.162036	0.137547	0.151718	0.128007	0.0829184	0.110973	0.131514	0.166304	0.0835185	0.042445	0.166721	0.0732333	0.0933428	0.0904248	0.14827
17.2393	0.0920386	0.0713669	0.11629	0.101733	0.0899252	0.0533994	0.0843624	0.134598	0.0899115	0.0910412	0.168638	0.214399	0.238552	0.244639	0.243017	0.125033	0.19315	0.230064	0.233464	0.223858	0.213906	0.171016	0.173506	0.223887	0.208578	0.190667	0.197815	0.241797	0.130264	0.233342	0.162868	0.178017	0.142492	0.145881	0.162852	0.138785	0.153274	0.129507	0.084374	0.112615	0.132653	0.167019	0.0849597	0.0433007	0.167792	0.0744963	0.0946052	0.0915856	0.149512
17.2691	0.0935774	0.0728925	0.117369	0.103053	0.0913311	0.054576	0.0858631	0.136146	0.0914826	0.0926277	0.169835	0.214465	0.23612	0.242636	0.241709	0.12703	0.193318	0.229439	0.232809	0.223802	0.21498	0.172777	0.174762	0.223868	0.209406	0.191414	0.19852	0.241527	0.1321	0.233143	0.163839	0.178966	0.143238	0.146832	0.163618	0.139994	0.154783	0.130983	0.0858291	0.114245	0.133767	0.167672	0.0863928	0.0441602	0.168811	0.0757547	0.0958556	0.09273	0.150725
17.2989	0.095116	0.0744244	0.118423	0.104358	0.092728	0.05576	0.0873645	0.137665	0.0930544	0.0942086	0.17098	0.214446	0.233578	0.240532	0.240291	0.128983	0.193415	0.228706	0.232061	0.223639	0.215955	0.174472	0.175969	0.223752	0.210155	0.192094	0.199154	0.241141	0.133909	0.232834	0.164743	0.17985	0.143941	0.147739	0.164331	0.141173	0.156244	0.132431	0.0872829	0.115864	0.134853	0.168262	0.0878167	0.0450231	0.169777	0.077008	0.0970936	0.0938574	0.151909
17.3287	0.0966537	0.0759618	0.119453	0.105647	0.0941152	0.0569511	0.0888658	0.139154	0.0946261	0.095783	0.172069	0.214344	0.230929	0.23833	0.238766	0.130891	0.193442	0.227869	0.23122	0.223368	0.21683	0.1761	0.177127	0.223541	0.210826	0.192706	0.199715	0.24064	0.135688	0.232415	0.165581	0.180667	0.144601	0.148602	0.164993	0.142322	0.157656	0.133853	0.0887345	0.11747	0.135911	0.16879	0.0892306	0.0458893	0.170691	0.0782553	0.0983184	0.0949673	0.153063
17.3586	0.0981898	0.0775037	0.120457	0.10692	0.0954921	0.0581487	0.0903665	0.140613	0.0961969	0.09735	0.173104	0.21416	0.228181	0.236035	0.237139	0.132752	0.1934	0.22693	0.230289	0.222991	0.217603	0.17766	0.178235	0.223235	0.211418	0.193251	0.200204	0.240026	0.137436	0.231887	0.166352	0.181418	0.145217	0.14942	0.165603	0.14344	0.159018	0.135245	0.0901832	0.119063	0.136941	0.169255	0.0906336	0.0467585	0.17155	0.0794961	0.0995294	0.0960593	0.154186
17.3884	0.0997235	0.0790496	0.121435	0.108176	0.096858	0.0593525	0.0918656	0.14204	0.097766	0.0989084	0.174084	0.213895	0.225339	0.233651	0.235411	0.134563	0.19329	0.225892	0.22927	0.22251	0.218276	0.179151	0.179292	0.222835	0.211932	0.193728	0.200621	0.239301	0.139153	0.231253	0.167057	0.182102	0.145791	0.150194	0.166161	0.144526	0.160329	0.136608	0.0916283	0.120641	0.137943	0.169658	0.0920249	0.0476303	0.172356	0.0807295	0.100726	0.0971329	0.155279
17.4182	0.101254	0.0805985	0.122386	0.109416	0.0982123	0.0605619	0.0933625	0.143435	0.0993327	0.100458	0.175007	0.213549	0.222408	0.231183	0.233588	0.136322	0.193111	0.224757	0.228163	0.221928	0.218848	0.18057	0.180298	0.222343	0.212367	0.194138	0.200966	0.238466	0.140836	0.230515	0.167696	0.182719	0.146321	0.150924	0.166667	0.145579	0.161589	0.137941	0.0930691	0.122203	0.138914	0.169997	0.0934036	0.0485046	0.173108	0.0819551	0.101908	0.0981878	0.156341
17.448	0.102781	0.0821498	0.123312	0.110638	0.0995545	0.0617766	0.0948565	0.144797	0.100896	0.101997	0.175874	0.213126	0.219396	0.228634	0.231673	0.138026	0.192866	0.223528	0.226972	0.221246	0.219319	0.181918	0.181251	0.221761	0.212725	0.194482	0.201239	0.237523	0.142485	0.229675	0.16827	0.183269	0.146808	0.15161	0.16712	0.146599	0.162796	0.139243	0.0945048	0.123749	0.139856	0.170275	0.0947692	0.0493811	0.173806	0.0831722	0.103075	0.0992237	0.157371
17.4778	0.104304	0.0837027	0.12421	0.111842	0.100884	0.0629961	0.0963469	0.146125	0.102456	0.103525	0.176685	0.212625	0.216307	0.226011	0.22967	0.139675	0.192554	0.222208	0.225699	0.220466	0.219689	0.183193	0.182152	0.22109	0.213004	0.19476	0.201441	0.236476	0.144098	0.228736	0.168779	0.183752	0.147252	0.152252	0.167522	0.147586	0.163951	0.140512	0.0959348	0.125278	0.140768	0.170491	0.0961208	0.0502595	0.174449	0.0843804	0.104226	0.10024	0.158368
17.5076	0.105821	0.0852565	0.125082	0.113028	0.102201	0.0642202	0.0978329	0.14742	0.10401	0.105041	0.177439	0.212048	0.21315	0.223317	0.227584	0.141267	0.192178	0.220802	0.224345	0.219593	0.21996	0.184395	0.183	0.220333	0.213207	0.194972	0.201573	0.235326	0.145674	0.227701	0.169225	0.184168	0.147655	0.152851	0.167872	0.148539	0.165054	0.141749	0.0973584	0.12679	0.141648	0.170645	0.0974579	0.0511398	0.175039	0.085579	0.105361	0.101237	0.159334
17.5374	0.107332	0.0868107	0.125927	0.114197	0.103504	0.0654483	0.099314	0.14868	0.10556	0.106544	0.178136	0.211399	0.209931	0.220558	0.225417	0.142799	0.191738	0.219312	0.222914	0.218627	0.220132	0.185524	0.183795	0.219491	0.213334	0.195119	0.201635	0.234077	0.147212	0.226572	0.169608	0.184518	0.148015	0.153407	0.168171	0.149458	0.166103	0.142952	0.098775	0.128283	0.142498	0.170738	0.0987799	0.0520217	0.175575	0.0867677	0.106479	0.102215	0.160267
17.5672	0.108837	0.0883646	0.126745	0.115347	0.104794	0.0666802	0.100789	0.149906	0.107103	0.108034	0.178777	0.210677	0.206655	0.217739	0.223176	0.144272	0.191235	0.217742	0.221407	0.217574	0.220207	0.186579	0.184536	0.218568	0.213386	0.195202	0.201628	0.232732	0.148711	0.225353	0.169931	0.184803	0.148333	0.153921	0.168419	0.150342	0.167099	0.144121	0.100184	0.129757	0.143316	0.170771	0.100086	0.052905	0.176058	0.087946	0.107581	0.103173	0.161167
17.597	0.110335	0.0899177	0.127536	0.116478	0.106069	0.0679156	0.102259	0.151096	0.108639	0.109511	0.179362	0.209886	0.20333	0.214864	0.220864	0.145683	0.190672	0.216097	0.219829	0.216436	0.220185	0.18756	0.185224	0.217564	0.213363	0.195223	0.201552	0.231294	0.150171	0.224047	0.170195	0.185022	0.148611	0.154393	0.168616	0.15119	0.168043	0.145255	0.101585	0.131211	0.144102	0.170744	0.101377	0.0537896	0.176487	0.0891137	0.108666	0.104111	0.162034
17.6268	0.111826	0.0914693	0.128301	0.117592	0.107331	0.0691541	0.103721	0.152252	0.110168	0.110972	0.179891	0.209028	0.199962	0.211939	0.218486	0.147031	0.19005	0.214379	0.21818	0.215216	0.220068	0.188467	0.185858	0.216484	0.213268	0.195181	0.201409	0.229766	0.151591	0.222658	0.170401	0.185177	0.148848	0.154824	0.168764	0.152004	0.168933	0.146355	0.102976	0.132645	0.144857	0.170659	0.102651	0.0546754	0.176864	0.0902703	0.109734	0.10503	0.162868
17.6566	0.113308	0.0930191	0.129039	0.118687	0.108578	0.0703956	0.105176	0.153372	0.111689	0.112419	0.180364	0.208104	0.196557	0.208968	0.216047	0.148317	0.18937	0.212593	0.216465	0.213919	0.219858	0.189302	0.186438	0.21533	0.2131	0.195078	0.201201	0.228152	0.15297	0.221189	0.170551	0.185269	0.149046	0.155214	0.168863	0.152782	0.169772	0.147418	0.104359	0.134058	0.145579	0.170517	0.103908	0.0555623	0.17719	0.0914156	0.110784	0.105929	0.163669
17.6864	0.114781	0.0945666	0.12975	0.119764	0.10981	0.0716397	0.106623	0.154457	0.1132	0.11385	0.180782	0.207118	0.193123	0.205957	0.213551	0.149538	0.188634	0.210744	0.214687	0.212548	0.219557	0.190063	0.186964	0.214104	0.212863	0.194915	0.200927	0.226456	0.154307	0.219644	0.170648	0.185298	0.149206	0.155565	0.168914	0.153525	0.170559	0.148446	0.105732	0.13545	0.14627	0.170318	0.105148	0.0564502	0.177464	0.0925493	0.111817	0.106809	0.164436
17.7162	0.116245	0.0961113	0.130436	0.120823	0.111028	0.0728863	0.108062	0.155506	0.114702	0.115265	0.181146	0.206071	0.189664	0.20291	0.211003	0.150696	0.187844	0.208834	0.212848	0.211106	0.219167	0.190752	0.187436	0.21281	0.212556	0.194694	0.20059	0.224681	0.155602	0.218027	0.170692	0.185266	0.149327	0.155878	0.168918	0.154232	0.171295	0.149438	0.107094	0.13682	0.146928	0.170063	0.106371	0.057339	0.177688	0.0936715	0.112833	0.107669	0.165171
17.746	0.117699	0.0976529	0.131096	0.121864	0.112232	0.0741352	0.109492	0.15652	0.116194	0.116663	0.181456	0.204965	0.186189	0.199832	0.208408	0.151789	0.187001	0.206869	0.210951	0.209599	0.21869	0.19137	0.187856	0.211451	0.212182	0.194415	0.200191	0.222832	0.156854	0.216341	0.170688	0.185174	0.149412	0.156153	0.168876	0.154904	0.17198	0.150394	0.108445	0.138168	0.147554	0.169755	0.107577	0.0582287	0.177862	0.0947817	0.113831	0.108511	0.165871
17.7758	0.119142	0.0991909	0.131731	0.122887	0.11342	0.0753862	0.110912	0.157499	0.117676	0.118044	0.181713	0.203804	0.182701	0.196728	0.20577	0.152818	0.186109	0.204852	0.208999	0.20803	0.218129	0.191918	0.188222	0.21003	0.211742	0.19408	0.199732	0.220912	0.158064	0.214592	0.170636	0.185023	0.149461	0.156392	0.168788	0.15554	0.172616	0.151313	0.109786	0.139494	0.148148	0.169393	0.108766	0.0591192	0.177989	0.0958801	0.114812	0.109334	0.166539
17.8056	0.120575	0.100725	0.132341	0.123893	0.114594	0.0766391	0.112323	0.158443	0.119146	0.119408	0.181918	0.20259	0.179208	0.193603	0.203093	0.153783	0.185168	0.202787	0.206997	0.206403	0.217485	0.192396	0.188536	0.208549	0.211238	0.19369	0.199213	0.218925	0.15923	0.212782	0.170539	0.184815	0.149476	0.156595	0.168657	0.15614	0.173204	0.152196	0.111114	0.140797	0.14871	0.16898	0.109937	0.0600106	0.178067	0.0969665	0.115776	0.11014	0.167173
17.8354	0.121996	0.102255	0.132926	0.124882	0.115754	0.0778939	0.113723	0.159352	0.120604	0.120755	0.182072	0.201326	0.175715	0.190461	0.200383	0.154684	0.18418	0.200679	0.204946	0.204722	0.216763	0.192806	0.188797	0.207013	0.210671	0.193247	0.198637	0.216875	0.160354	0.210917	0.170399	0.184551	0.149456	0.156764	0.168483	0.156705	0.173744	0.153042	0.112431	0.142077	0.14924	0.168517	0.111091	0.0609029	0.1781	0.098041	0.116722	0.110927	0.167775
17.8652	0.123406	0.103781	0.133488	0.125854	0.116899	0.0791504	0.115112	0.160226	0.12205	0.122083	0.182176	0.200013	0.172227	0.187308	0.197645	0.155521	0.183149	0.198533	0.202851	0.202991	0.215964	0.19315	0.189007	0.205423	0.210044	0.192753	0.198006	0.214767	0.161434	0.208999	0.170219	0.184233	0.149405	0.156899	0.168267	0.157235	0.174237	0.153852	0.113735	0.143334	0.149739	0.168006	0.112228	0.0617962	0.178088	0.0991036	0.117651	0.111697	0.168343
17.895	0.124803	0.105302	0.134026	0.12681	0.118029	0.0804086	0.116491	0.161066	0.123483	0.123394	0.182231	0.198655	0.16875	0.184146	0.194881	0.156296	0.182076	0.196351	0.200714	0.201215	0.215092	0.193428	0.189166	0.203785	0.209358	0.192208	0.197321	0.212603	0.162471	0.207034	0.170002	0.183863	0.149322	0.157003	0.168012	0.157729	0.174685	0.154625	0.115027	0.144568	0.150205	0.167447	0.113349	0.0626904	0.178032	0.100154	0.118564	0.112451	0.168879
17.9248	0.126188	0.106818	0.134542	0.12775	0.119146	0.0816683	0.117858	0.161873	0.124902	0.124686	0.182238	0.197253	0.165288	0.180981	0.192098	0.157009	0.180962	0.194138	0.198538	0.199398	0.214148	0.193643	0.189274	0.2021	0.208616	0.191614	0.196583	0.210388	0.163464	0.205025	0.169748	0.183442	0.14921	0.157075	0.167717	0.158189	0.17509	0.155363	0.116306	0.145779	0.150641	0.166843	0.114452	0.0635858	0.177933	0.101193	0.11946	0.113188	0.169383
17.9546	0.12756	0.108329	0.135036	0.128675	0.120249	0.0829296	0.119214	0.162645	0.126308	0.12596	0.182199	0.195812	0.161846	0.177816	0.189298	0.157661	0.179811	0.191899	0.196327	0.197543	0.213137	0.193796	0.189333	0.200372	0.207818	0.190973	0.195796	0.208126	0.164415	0.202976	0.169462	0.182972	0.149069	0.157119	0.167385	0.158615	0.175451	0.156064	0.117572	0.146966	0.151046	0.166195	0.115539	0.0644824	0.177793	0.10222	0.12034	0.11391	0.169854
17.9844	0.128919	0.109835	0.135508	0.129585	0.121338	0.0841923	0.120558	0.163385	0.1277	0.127216	0.182115	0.194332	0.158429	0.174657	0.186487	0.158253	0.178625	0.189636	0.194085	0.195654	0.212062	0.193888	0.189344	0.198604	0.206968	0.190287	0.19496	0.205821	0.165323	0.200892	0.169145	0.182455	0.148901	0.157133	0.167018	0.159007	0.175772	0.15673	0.118824	0.14813	0.15142	0.165505	0.11661	0.0653804	0.177614	0.103236	0.121204	0.114616	0.170293
18.0142	0.130264	0.111335	0.135959	0.13048	0.122414	0.0854565	0.12189	0.164092	0.129077	0.128453	0.181987	0.192817	0.15504	0.171505	0.183668	0.158787	0.177405	0.187354	0.191813	0.193736	0.210924	0.193923	0.189306	0.196799	0.206067	0.189557	0.194077	0.203476	0.166188	0.198775	0.168799	0.181893	0.148707	0.157121	0.166616	0.159365	0.176052	0.15736	0.120063	0.14927	0.151764	0.164775	0.117666	0.0662798	0.177396	0.104241	0.122052	0.115308	0.1707
18.044	0.131595	0.11283	0.13639	0.131362	0.123477	0.0867221	0.123209	0.164766	0.13044	0.129672	0.181817	0.19127	0.151683	0.168366	0.180845	0.159263	0.176154	0.185056	0.189516	0.191792	0.209728	0.193901	0.189222	0.194961	0.205118	0.188784	0.193151	0.201094	0.167011	0.196631	0.168427	0.181288	0.148488	0.157083	0.166181	0.159689	0.176294	0.157956	0.121289	0.150386	0.152079	0.164006	0.118706	0.0671809	0.177141	0.105234	0.122885	0.115986	0.171076
18.0738	0.132912	0.114318	0.136802	0.132229	0.124526	0.0879891	0.124516	0.165409	0.131787	0.130871	0.181605	0.189692	0.148362	0.165242	0.178021	0.159684	0.174873	0.182746	0.187196	0.189825	0.208476	0.193825	0.189091	0.193092	0.204121	0.187971	0.192182	0.198681	0.167793	0.194462	0.168031	0.180641	0.148247	0.15702	0.165714	0.159982	0.1765	0.158517	0.1225	0.151479	0.152364	0.1632	0.119732	0.0680839	0.176851	0.106217	0.123703	0.116651	0.171421
18.1036	0.134214	0.1158	0.137195	0.133084	0.125563	0.0892575	0.12581	0.16602	0.133118	0.132053	0.181355	0.188085	0.145079	0.162136	0.175201	0.160051	0.173566	0.180427	0.184856	0.18784	0.207172	0.193697	0.188915	0.191195	0.20308	0.187119	0.191172	0.196238	0.168533	0.192273	0.167613	0.179956	0.147984	0.156934	0.165219	0.160242	0.176669	0.159044	0.123697	0.152549	0.152621	0.162358	0.120743	0.068989	0.176527	0.107188	0.124507	0.117304	0.171736
18.1335	0.135502	0.117275	0.13757	0.133926	0.126588	0.0905272	0.127091	0.1666	0.134434	0.133216	0.181066	0.186453	0.141839	0.159053	0.172388	0.160365	0.172234	0.178103	0.1825	0.185839	0.205819	0.193519	0.188696	0.189273	0.201996	0.186229	0.190124	0.19377	0.169232	0.190066	0.167174	0.179233	0.1477	0.156826	0.164695	0.16047	0.176805	0.159538	0.124881	0.153595	0.152849	0.161483	0.121741	0.0698964	0.17617	0.10815	0.125298	0.117944	0.172019
18.1633	0.136775	0.118744	0.137927	0.134756	0.1276	0.0917982	0.128359	0.167149	0.135733	0.13436	0.18074	0.184798	0.138642	0.155994	0.169585	0.160628	0.17088	0.175777	0.18013	0.183825	0.204419	0.193293	0.188433	0.187329	0.200872	0.185304	0.189039	0.191279	0.169892	0.187845	0.166718	0.178476	0.147398	0.156697	0.164145	0.160668	0.176908	0.159999	0.12605	0.154619	0.15305	0.160576	0.122725	0.0708062	0.175782	0.109101	0.126074	0.118573	0.172273
18.1931	0.138033	0.120205	0.138268	0.135575	0.1286	0.0930705	0.129614	0.167669	0.137016	0.135487	0.18038	0.183122	0.135493	0.152963	0.166795	0.160842	0.169504	0.173452	0.177749	0.181803	0.202976	0.19302	0.188129	0.185366	0.199709	0.184345	0.187919	0.188769	0.170512	0.185614	0.166245	0.177685	0.147078	0.156548	0.163569	0.160835	0.17698	0.160427	0.127205	0.155619	0.153225	0.15964	0.123696	0.0717189	0.175365	0.110042	0.126838	0.119192	0.172498
18.2229	0.139275	0.121659	0.138593	0.136382	0.129589	0.094344	0.130855	0.168158	0.138283	0.136594	0.179986	0.181426	0.132392	0.149962	0.16402	0.16101	0.16811	0.17113	0.17536	0.179773	0.201493	0.192704	0.187784	0.183385	0.198509	0.183353	0.186767	0.186243	0.171093	0.183375	0.165758	0.176864	0.146742	0.156381	0.162971	0.160972	0.177023	0.160824	0.128345	0.156595	0.153373	0.158675	0.124656	0.0726346	0.174919	0.110974	0.127589	0.1198	0.172693
18.2527	0.140501	0.123105	0.138902	0.137178	0.130566	0.0956187	0.132083	0.168618	0.139532	0.137684	0.17956	0.179714	0.129342	0.146993	0.161264	0.161132	0.1667	0.168814	0.172966	0.17774	0.199972	0.192347	0.187399	0.181391	0.197275	0.182331	0.185584	0.183704	0.171636	0.181131	0.165257	0.176014	0.146391	0.156197	0.162351	0.16108	0.177037	0.16119	0.129472	0.157549	0.153495	0.157683	0.125603	0.0735536	0.174447	0.111896	0.128327	0.120399	0.172859
18.2825	0.141711	0.124543	0.139197	0.137964	0.131532	0.0968944	0.133297	0.16905	0.140765	0.138756	0.179104	0.177987	0.126344	0.144059	0.158529	0.161212	0.165275	0.166508	0.170568	0.175706	0.198417	0.191949	0.186976	0.179384	0.196008	0.18128	0.184372	0.181155	0.172142	0.178884	0.164745	0.175137	0.146026	0.155996	0.161711	0.16116	0.177023	0.161525	0.130583	0.158481	0.153593	0.156667	0.126539	0.0744762	0.17395	0.112808	0.129055	0.120989	0.172997
18.3123	0.142905	0.125972	0.139478	0.138739	0.132487	0.0981712	0.134497	0.169452	0.14198	0.139809	0.178619	0.176247	0.123399	0.141161	0.155818	0.16125	0.163837	0.164213	0.16817	0.173672	0.196832	0.191515	0.186516	0.177368	0.19471	0.180201	0.183133	0.178598	0.172612	0.176639	0.164222	0.174235	0.14565	0.155781	0.161053	0.161212	0.176984	0.16183	0.131681	0.159389	0.153666	0.155628	0.127465	0.0754027	0.173428	0.113712	0.129771	0.12157	0.173107
18.3421	0.144082	0.127393	0.139745	0.139505	0.13343	0.0994488	0.135683	0.169827	0.143178	0.140845	0.178106	0.174496	0.120509	0.138302	0.153131	0.16125	0.162388	0.161931	0.165774	0.171642	0.195217	0.191045	0.18602	0.175344	0.193382	0.179097	0.181869	0.176037	0.173045	0.174396	0.16369	0.173311	0.145262	0.155551	0.160378	0.161237	0.176921	0.162107	0.132764	0.160275	0.153716	0.154567	0.12838	0.0763333	0.172884	0.114608	0.130476	0.122144	0.173189
18.3719	0.145243	0.128803	0.139999	0.140261	0.134363	0.100727	0.136855	0.170174	0.144358	0.141863	0.177567	0.172736	0.117674	0.135483	0.150472	0.161213	0.160929	0.159665	0.163382	0.169617	0.193577	0.190541	0.18549	0.173315	0.192028	0.177968	0.180581	0.173473	0.173444	0.172158	0.163151	0.172366	0.144864	0.155308	0.159687	0.161236	0.176834	0.162355	0.133832	0.161138	0.153744	0.153487	0.129285	0.0772683	0.172319	0.115494	0.131171	0.122711	0.173244
18.4017	0.146387	0.130204	0.140241	0.141007	0.135285	0.102006	0.138013	0.170494	0.14552	0.142863	0.177004	0.17097	0.114894	0.132705	0.147842	0.161141	0.159464	0.157416	0.160996	0.167599	0.191914	0.190006	0.184926	0.171283	0.190648	0.176817	0.179272	0.170909	0.173809	0.169928	0.162604	0.171402	0.144458	0.155052	0.158983	0.16121	0.176725	0.162575	0.134886	0.161979	0.153749	0.152389	0.130181	0.0782081	0.171733	0.116373	0.131856	0.123271	0.173272
18.4315	0.147513	0.131594	0.140471	0.141745	0.136196	0.103286	0.139156	0.170786	0.146664	0.143846	0.176418	0.169197	0.112171	0.129969	0.145243	0.161037	0.157992	0.155187	0.158619	0.16559	0.190231	0.189442	0.18433	0.169249	0.189244	0.175645	0.177943	0.168348	0.174141	0.167707	0.162051	0.170422	0.144045	0.154786	0.158266	0.161159	0.176594	0.162768	0.135926	0.162798	0.153734	0.151274	0.131068	0.0791529	0.171129	0.117243	0.132531	0.123824	0.173274
18.4613	0.148621	0.132974	0.140689	0.142473	0.137097	0.104566	0.140285	0.171052	0.147791	0.144812	0.175811	0.167421	0.109505	0.127278	0.142676	0.160902	0.156516	0.152979	0.156253	0.163591	0.18853	0.18885	0.183702	0.167216	0.187818	0.174454	0.176595	0.165791	0.174441	0.165496	0.161493	0.169426	0.143625	0.154508	0.157539	0.161083	0.176443	0.162935	0.136951	0.163595	0.153698	0.150144	0.131947	0.0801029	0.170507	0.118106	0.133198	0.124371	0.17325
18.4911	0.149712	0.134342	0.140896	0.143192	0.137987	0.105845	0.1414	0.171292	0.148899	0.14576	0.175183	0.165643	0.106895	0.124631	0.140141	0.160739	0.155037	0.150793	0.153898	0.161604	0.186815	0.188232	0.183045	0.165185	0.186371	0.173245	0.175231	0.163242	0.174709	0.163298	0.160931	0.168417	0.1432	0.154221	0.156802	0.160985	0.176272	0.163077	0.137961	0.164369	0.153642	0.149001	0.132816	0.0810586	0.169869	0.118961	0.133855	0.124913	0.1732
18.5209	0.150785	0.135698	0.141092	0.143901	0.138866	0.107125	0.142499	0.171506	0.149989	0.146691	0.174536	0.163864	0.104342	0.12203	0.137641	0.16055	0.153557	0.148631	0.151558	0.159629	0.185087	0.187591	0.18236	0.163157	0.184905	0.172019	0.173851	0.160701	0.174947	0.161114	0.160364	0.167397	0.14277	0.153925	0.156057	0.160864	0.176083	0.163194	0.138957	0.165121	0.153568	0.147847	0.133678	0.0820201	0.169215	0.119808	0.134504	0.125449	0.173125
18.5507	0.151839	0.137041	0.141277	0.144602	0.139735	0.108404	0.143583	0.171694	0.151061	0.147605	0.173871	0.162086	0.101845	0.119475	0.135177	0.160338	0.152077	0.146494	0.149233	0.157668	0.183349	0.186927	0.181647	0.161135	0.183422	0.170779	0.172458	0.158172	0.175155	0.158945	0.159795	0.166367	0.142337	0.15362	0.155305	0.160721	0.175875	0.163286	0.139938	0.165851	0.153476	0.146681	0.134533	0.0829877	0.168547	0.120648	0.135145	0.12598	0.173025
18.5805	0.152874	0.138371	0.141453	0.145293	0.140592	0.109683	0.144652	0.171857	0.152114	0.148502	0.17319	0.16031	0.0994049	0.116967	0.132748	0.160103	0.150598	0.144383	0.146926	0.155723	0.181603	0.186242	0.180907	0.159119	0.181922	0.169525	0.171052	0.155656	0.175335	0.156793	0.159222	0.165329	0.141902	0.153308	0.154547	0.160558	0.175651	0.163355	0.140905	0.16656	0.153367	0.145507	0.135379	0.0839616	0.167866	0.121481	0.135778	0.126506	0.1729
18.6103	0.15389	0.139687	0.141618	0.145976	0.141439	0.11096	0.145706	0.171994	0.153149	0.149382	0.172494	0.158538	0.09702	0.114506	0.130356	0.159848	0.149122	0.142299	0.144637	0.153792	0.179852	0.185538	0.180143	0.157111	0.180408	0.168259	0.169636	0.153154	0.175488	0.154658	0.158647	0.164285	0.141465	0.152988	0.153785	0.160374	0.175409	0.163401	0.141857	0.167246	0.153241	0.144325	0.136218	0.0849422	0.167172	0.122307	0.136403	0.127027	0.172751
18.6401	0.154887	0.140989	0.141774	0.146648	0.142274	0.112237	0.146744	0.172108	0.154165	0.150246	0.171783	0.156771	0.0946903	0.112092	0.128001	0.159576	0.147649	0.140244	0.142369	0.151879	0.178098	0.184817	0.179355	0.155113	0.17888	0.166983	0.16821	0.150669	0.175614	0.152541	0.158069	0.163235	0.141028	0.152662	0.15302	0.160171	0.175151	0.163425	0.142794	0.16791	0.1531	0.143137	0.13705	0.0859297	0.166467	0.123126	0.137021	0.127544	0.172579
18.6699	0.155864	0.142275	0.14192	0.147311	0.143099	0.113511	0.147766	0.172196	0.155162	0.151092	0.17106	0.155009	0.0924151	0.109727	0.125683	0.159288	0.146182	0.138217	0.140122	0.149982	0.176343	0.18408	0.178545	0.153125	0.177339	0.165697	0.166775	0.148202	0.175714	0.150444	0.15749	0.162183	0.140591	0.152329	0.152252	0.159949	0.174877	0.163428	0.143717	0.168553	0.152944	0.141943	0.137875	0.0869242	0.165751	0.123938	0.137632	0.128057	0.172383
18.6997	0.15682	0.143547	0.142057	0.147964	0.143912	0.114784	0.148772	0.172261	0.156141	0.151923	0.170325	0.153255	0.0901938	0.107408	0.123404	0.158987	0.14472	0.136219	0.137897	0.148102	0.174589	0.183328	0.177713	0.151149	0.175788	0.164404	0.165334	0.145755	0.175789	0.148367	0.156909	0.161128	0.140154	0.151991	0.151483	0.159709	0.174588	0.163409	0.144624	0.169173	0.152774	0.140746	0.138692	0.087926	0.165025	0.124744	0.138235	0.128565	0.172163
18.7295	0.157757	0.144802	0.142184	0.148607	0.144713	0.116055	0.149761	0.172302	0.1571	0.152736	0.169579	0.15151	0.0880256	0.105138	0.121162	0.158674	0.143265	0.134252	0.135696	0.146241	0.172838	0.182563	0.176861	0.149185	0.174226	0.163104	0.163887	0.143329	0.17584	0.14631	0.156326	0.160073	0.139719	0.151647	0.150715	0.159452	0.174283	0.16337	0.145517	0.169771	0.15259	0.139546	0.139502	0.0889353	0.16429	0.125543	0.138832	0.129068	0.171921
18.7593	0.158672	0.14604	0.142303	0.14924	0.145503	0.117323	0.150734	0.17232	0.158041	0.153533	0.168824	0.149774	0.0859097	0.102915	0.118959	0.15835	0.141818	0.132314	0.133519	0.144398	0.171092	0.181786	0.175989	0.147234	0.172656	0.161798	0.162436	0.140926	0.175868	0.144274	0.155741	0.159019	0.139286	0.151297	0.149947	0.159178	0.173964	0.163312	0.146395	0.170347	0.152394	0.138344	0.140305	0.0899523	0.163546	0.126335	0.139421	0.129568	0.171656
18.7891	0.159567	0.147261	0.142413	0.149861	0.14628	0.118587	0.151689	0.172314	0.158963	0.154314	0.16806	0.148048	0.0838453	0.100739	0.116793	0.158019	0.14038	0.130408	0.131367	0.142573	0.169353	0.180997	0.175099	0.145298	0.171079	0.160488	0.160981	0.138546	0.175875	0.14226	0.155156	0.157966	0.138855	0.150943	0.14918	0.158888	0.17363	0.163235	0.147257	0.170901	0.152187	0.137142	0.141101	0.0909771	0.162795	0.127121	0.140004	0.130063	0.171369
18.8189	0.160439	0.148464	0.142513	0.150472	0.147046	0.119849	0.152628	0.172286	0.159866	0.155078	0.167287	0.146333	0.0818314	0.0986103	0.114666	0.157682	0.138951	0.128533	0.129242	0.140768	0.167622	0.180199	0.174192	0.143377	0.169494	0.159175	0.159523	0.136191	0.175859	0.140268	0.154569	0.156917	0.138428	0.150584	0.148416	0.158582	0.173281	0.163139	0.148105	0.171432	0.151968	0.135941	0.141889	0.0920099	0.162036	0.1279	0.140581	0.130553	0.17106
18.8487	0.161291	0.149648	0.142605	0.151071	0.147798	0.121106	0.153549	0.172235	0.16075	0.155826	0.166508	0.14463	0.0798671	0.0965282	0.112577	0.15734	0.137533	0.126689	0.127143	0.138981	0.165901	0.179393	0.173269	0.141473	0.167904	0.15786	0.158064	0.133863	0.175824	0.138298	0.15398	0.155872	0.138004	0.150221	0.147655	0.158262	0.172919	0.163025	0.148937	0.171942	0.151738	0.13474	0.14267	0.0930508	0.16127	0.128673	0.14115	0.131039	0.17073
18.8785	0.16212	0.150814	0.142688	0.151658	0.148538	0.12236	0.154452	0.172162	0.161614	0.156557	0.165723	0.142941	0.0779515	0.0944923	0.110525	0.156996	0.136125	0.124877	0.125072	0.137213	0.164191	0.178579	0.172331	0.139584	0.166309	0.156544	0.156604	0.131561	0.175769	0.136351	0.153391	0.154831	0.137585	0.149853	0.146898	0.157928	0.172542	0.162893	0.149754	0.172428	0.151499	0.133543	0.143444	0.0940999	0.160499	0.12944	0.141713	0.13152	0.170378
18.9084	0.162926	0.15196	0.142763	0.152233	0.149266	0.123608	0.155337	0.172067	0.16246	0.157272	0.164931	0.141264	0.0760836	0.092502	0.108511	0.15665	0.134729	0.123096	0.123028	0.135464	0.162495	0.177758	0.171379	0.137713	0.16471	0.155228	0.155144	0.129288	0.175695	0.134426	0.152799	0.153797	0.13717	0.149481	0.146145	0.15758	0.172152	0.162745	0.150556	0.172893	0.15125	0.132348	0.144209	0.0951574	0.159721	0.1302	0.142269	0.131997	0.170005
18.9382	0.16371	0.153085	0.142828	0.152796	0.14998	0.124852	0.156203	0.17195	0.163286	0.157971	0.164135	0.139602	0.0742623	0.0905569	0.106534	0.156305	0.133345	0.121347	0.121013	0.133735	0.160812	0.176931	0.170413	0.13586	0.163108	0.153913	0.153686	0.127044	0.175603	0.132524	0.152207	0.15277	0.13676	0.149105	0.145396	0.157219	0.171747	0.16258	0.151342	0.173334	0.150992	0.131158	0.144967	0.0962233	0.158938	0.130953	0.142819	0.132468	0.169611
18.968	0.164471	0.15419	0.142885	0.153345	0.15068	0.12609	0.157051	0.171812	0.164093	0.158653	0.163335	0.137955	0.0724868	0.0886562	0.104595	0.155961	0.131973	0.119629	0.119026	0.132024	0.159145	0.176099	0.169435	0.134024	0.161504	0.1526	0.152229	0.124829	0.175494	0.130645	0.151613	0.15175	0.136355	0.148725	0.144654	0.156845	0.171328	0.162399	0.152112	0.173753	0.150727	0.129972	0.145716	0.0972976	0.15815	0.1317	0.143361	0.132934	0.169197
18.9978	0.165208	0.155274	0.142933	0.153881	0.151367	0.127322	0.157879	0.171653	0.16488	0.159319	0.162532	0.136323	0.0707558	0.0867993	0.102692	0.155621	0.130614	0.117943	0.117068	0.130333	0.157494	0.175263	0.168446	0.132208	0.159898	0.151289	0.150775	0.122645	0.175369	0.128789	0.151017	0.150739	0.135956	0.148341	0.143916	0.15646	0.170896	0.162202	0.152866	0.174149	0.150454	0.128792	0.146457	0.0983804	0.157357	0.132441	0.143897	0.133395	0.168762
19.0276	0.165922	0.156337	0.142973	0.154404	0.152039	0.128548	0.158689	0.171474	0.165648	0.159968	0.161725	0.134706	0.0690685	0.0849856	0.100824	0.155285	0.129269	0.116288	0.115139	0.12866	0.15586	0.174423	0.167446	0.13041	0.158291	0.149982	0.149324	0.120491	0.175227	0.126955	0.15042	0.149737	0.135562	0.147953	0.143185	0.156062	0.17045	0.16199	0.153605	0.174522	0.150174	0.127618	0.147189	0.0994717	0.15656	0.133174	0.144426	0.133851	0.168308
19.0574	0.166611	0.157377	0.143004	0.154912	0.152698	0.129767	0.159478	0.171273	0.166397	0.160601	0.160916	0.133106	0.0674238	0.0832142	0.0989931	0.154955	0.127937	0.114664	0.11324	0.127007	0.154244	0.17358	0.166436	0.128632	0.156684	0.14868	0.147877	0.118369	0.175071	0.125144	0.149821	0.148744	0.135174	0.14756	0.142461	0.155654	0.16999	0.161763	0.154327	0.174872	0.149887	0.126451	0.147912	0.100571	0.155759	0.133901	0.144948	0.134301	0.167833
19.0872	0.167277	0.158394	0.143027	0.155405	0.153342	0.130979	0.160247	0.171053	0.167126	0.161217	0.160105	0.131521	0.0658206	0.0814845	0.0971969	0.154632	0.126619	0.113071	0.111369	0.125371	0.152647	0.172735	0.165417	0.126874	0.155078	0.147382	0.146435	0.116278	0.1749	0.123357	0.14922	0.147762	0.134792	0.147164	0.141743	0.155235	0.169516	0.161522	0.155033	0.175198	0.149594	0.125291	0.148626	0.10168	0.154953	0.134622	0.145463	0.134744	0.167339
19.117	0.167918	0.159389	0.14304	0.155883	0.153971	0.132182	0.160996	0.170812	0.167835	0.161817	0.159292	0.129954	0.0642579	0.0797955	0.0954354	0.154317	0.125315	0.111508	0.109528	0.123755	0.15107	0.171888	0.164389	0.125135	0.153473	0.14609	0.144997	0.114219	0.174714	0.121591	0.148617	0.146789	0.134416	0.146764	0.141031	0.154806	0.169029	0.161267	0.155723	0.175501	0.149295	0.124139	0.149331	0.102796	0.154144	0.135335	0.14597	0.135182	0.166826
19.1468	0.168535	0.160361	0.143046	0.156346	0.154586	0.133378	0.161724	0.170552	0.168524	0.1624	0.158477	0.128404	0.0627347	0.0781465	0.0937081	0.15401	0.124026	0.109975	0.107716	0.122156	0.149513	0.171039	0.163354	0.123416	0.151869	0.144803	0.143566	0.112193	0.174516	0.119848	0.148012	0.145828	0.134047	0.146359	0.140327	0.154367	0.168527	0.160998	0.156396	0.175781	0.148991	0.122996	0.150025	0.103921	0.153331	0.136041	0.146469	0.135613	0.166293
19.1766	0.169126	0.161309	0.143042	0.156793	0.155185	0.134565	0.16243	0.170273	0.169194	0.162966	0.157662	0.12687	0.0612499	0.0765366	0.0920143	0.153713	0.122751	0.108472	0.105932	0.120576	0.147976	0.170189	0.162311	0.121717	0.150267	0.143524	0.14214	0.110199	0.174304	0.118128	0.147405	0.144877	0.133683	0.14595	0.139629	0.153918	0.168012	0.160716	0.157053	0.176037	0.148682	0.121862	0.150709	0.105055	0.152515	0.13674	0.146961	0.136037	0.165742
19.2064	0.169693	0.162232	0.143031	0.157224	0.155769	0.135743	0.163116	0.169974	0.169843	0.163515	0.156846	0.125354	0.0598025	0.074965	0.0903535	0.153426	0.121491	0.106997	0.104178	0.119014	0.14646	0.169338	0.161262	0.120038	0.148668	0.142251	0.14072	0.108238	0.174079	0.116429	0.146796	0.143938	0.133326	0.145537	0.138939	0.153459	0.167483	0.16042	0.157693	0.176269	0.148368	0.120737	0.151383	0.106196	0.151695	0.137431	0.147445	0.136454	0.165172
19.2362	0.170235	0.163132	0.14301	0.157638	0.156337	0.136912	0.163779	0.169656	0.170472	0.164047	0.15603	0.123854	0.0583916	0.0734307	0.088725	0.15315	0.120246	0.105551	0.102452	0.117469	0.144965	0.168486	0.160207	0.118379	0.147072	0.140985	0.139307	0.106308	0.173842	0.114752	0.146184	0.143009	0.132975	0.145119	0.138255	0.152992	0.16694	0.160112	0.158316	0.176477	0.148049	0.119622	0.152046	0.107345	0.150872	0.138115	0.147921	0.136864	0.164584
19.266	0.170751	0.164006	0.142981	0.158035	0.15689	0.13807	0.164421	0.16932	0.171081	0.164562	0.155213	0.122372	0.0570161	0.0719329	0.0871283	0.152885	0.119015	0.104134	0.100754	0.115941	0.14349	0.167634	0.159146	0.116741	0.145479	0.139727	0.137902	0.104412	0.173594	0.113097	0.14557	0.142092	0.132629	0.144696	0.137578	0.152516	0.166383	0.15979	0.158922	0.176661	0.147726	0.118518	0.152697	0.108502	0.150046	0.138791	0.148388	0.137267	0.163978
19.2958	0.171241	0.164856	0.142944	0.158415	0.157427	0.139218	0.16504	0.168965	0.17167	0.165059	0.154396	0.120907	0.055675	0.0704705	0.0855626	0.152632	0.117798	0.102743	0.0990846	0.11443	0.142037	0.166782	0.15808	0.115122	0.14389	0.138477	0.136504	0.102547	0.173333	0.111463	0.144953	0.141186	0.13229	0.144269	0.136908	0.152032	0.165812	0.159457	0.159511	0.17682	0.147399	0.117424	0.153337	0.109667	0.149216	0.139459	0.148846	0.137662	0.163353
19.3256	0.171706	0.16568	0.142898	0.158777	0.157948	0.140355	0.165636	0.168591	0.172238	0.165539	0.153578	0.11946	0.0543674	0.0690429	0.0840274	0.152391	0.116596	0.101379	0.0974424	0.112936	0.140605	0.165929	0.15701	0.113523	0.142305	0.137236	0.135113	0.100714	0.173061	0.10985	0.144334	0.140291	0.131956	0.143837	0.136244	0.151539	0.165227	0.159111	0.160083	0.176956	0.147068	0.116341	0.153965	0.110839	0.148383	0.140119	0.149296	0.138048	0.162711
19.3554	0.172145	0.166479	0.142844	0.159121	0.158453	0.14148	0.166209	0.168199	0.172785	0.166002	0.152761	0.118028	0.0530922	0.0676489	0.0825219	0.152161	0.115408	0.100042	0.0958274	0.111458	0.139194	0.165076	0.155935	0.111944	0.140724	0.136002	0.13373	0.0989136	0.172778	0.108258	0.143711	0.139407	0.131627	0.143399	0.135586	0.151038	0.164628	0.158753	0.160638	0.177066	0.146733	0.11527	0.15458	0.112018	0.147546	0.14077	0.149736	0.138427	0.162052
19.3852	0.172558	0.167252	0.142781	0.159447	0.158941	0.142594	0.166759	0.16779	0.173311	0.166446	0.151943	0.116614	0.0518486	0.0662877	0.0810455	0.151943	0.114235	0.0987296	0.0942391	0.109997	0.137803	0.164222	0.154855	0.110385	0.139147	0.134777	0.132356	0.0971441	0.172484	0.106686	0.143086	0.138533	0.131304	0.142956	0.134935	0.150529	0.164015	0.158383	0.161175	0.177153	0.146394	0.114211	0.155182	0.113204	0.146706	0.141413	0.150167	0.138797	0.161375
19.415	0.172944	0.167999	0.14271	0.159754	0.159413	0.143695	0.167286	0.167362	0.173816	0.166873	0.151125	0.115216	0.0506356	0.0649584	0.0795975	0.151738	0.113075	0.0974421	0.092677	0.10855	0.136432	0.163368	0.153772	0.108845	0.137575	0.13356	0.130989	0.0954056	0.172178	0.105134	0.142457	0.137669	0.130985	0.142508	0.134289	0.150012	0.163388	0.158001	0.161695	0.177214	0.146052	0.113163	0.155771	0.114397	0.145862	0.142046	0.150588	0.139158	0.160681
19.4448	0.173305	0.16872	0.142631	0.160042	0.159868	0.144783	0.167788	0.166917	0.174299	0.167281	0.150306	0.113835	0.0494522	0.0636601	0.0781771	0.151543	0.111929	0.0961784	0.0911407	0.10712	0.135081	0.162513	0.152685	0.107324	0.136009	0.132352	0.129631	0.0936977	0.171861	0.103602	0.141825	0.136816	0.130671	0.142054	0.133648	0.149488	0.162747	0.157608	0.162197	0.17725	0.145706	0.112129	0.156346	0.115596	0.145015	0.14267	0.150999	0.13951	0.159971
19.4746	0.17364	0.169415	0.142543	0.160311	0.160307	0.145858	0.168266	0.166454	0.174761	0.167671	0.149487	0.112469	0.0482977	0.0623919	0.0767837	0.15136	0.110797	0.094938	0.0896297	0.105704	0.13375	0.161657	0.151595	0.105821	0.134447	0.131152	0.128281	0.0920199	0.171533	0.10209	0.141189	0.135972	0.130362	0.141595	0.133013	0.148956	0.162092	0.157203	0.162681	0.177262	0.145356	0.111107	0.156908	0.116801	0.144164	0.143285	0.151399	0.139853	0.159243
19.5044	0.173948	0.170083	0.142447	0.16056	0.160729	0.146919	0.16872	0.165974	0.175201	0.168042	0.148667	0.111119	0.047171	0.0611528	0.0754165	0.151188	0.109677	0.09372	0.0881434	0.104303	0.132437	0.1608	0.150501	0.104338	0.13289	0.129961	0.12694	0.0903718	0.171193	0.100596	0.14055	0.135137	0.130056	0.141129	0.132382	0.148417	0.161423	0.156787	0.163148	0.177248	0.145002	0.110099	0.157454	0.118011	0.143308	0.143889	0.151789	0.140187	0.1585
19.5342	0.17423	0.170725	0.142342	0.160789	0.161135	0.147966	0.169148	0.165476	0.175618	0.168394	0.147847	0.109784	0.0460715	0.059942	0.074075	0.151027	0.108571	0.0925236	0.0866813	0.102915	0.131142	0.159941	0.149404	0.102872	0.131339	0.128778	0.125607	0.0887528	0.170843	0.0991214	0.139908	0.13431	0.129754	0.140657	0.131755	0.14787	0.160739	0.156359	0.163597	0.177209	0.144644	0.109105	0.157986	0.119227	0.142449	0.144483	0.152167	0.140511	0.15774
19.564	0.174485	0.171339	0.142229	0.160999	0.161524	0.148998	0.169552	0.164962	0.176013	0.168727	0.147025	0.108464	0.0449981	0.0587587	0.0727583	0.150875	0.107477	0.0913481	0.0852428	0.101542	0.129865	0.15908	0.148305	0.101424	0.129793	0.127603	0.124283	0.0871625	0.17048	0.0976649	0.139261	0.133491	0.129454	0.140179	0.131132	0.147316	0.160042	0.15592	0.164028	0.177145	0.144282	0.108124	0.158502	0.120447	0.141586	0.145067	0.152534	0.140824	0.156964
19.5938	0.174714	0.171927	0.142108	0.161188	0.161896	0.150014	0.16993	0.16443	0.176386	0.16904	0.146202	0.107159	0.0439502	0.0576019	0.0714658	0.150732	0.106396	0.0901926	0.0838274	0.100182	0.128605	0.158217	0.147202	0.0999941	0.128253	0.126436	0.122967	0.0856001	0.170106	0.0962264	0.13861	0.13268	0.129158	0.139694	0.130512	0.146755	0.159331	0.15547	0.164441	0.177055	0.143917	0.107159	0.159003	0.121672	0.140718	0.14564	0.15289	0.141128	0.156172
19.6236	0.174917	0.172487	0.141978	0.161357	0.162251	0.151015	0.170283	0.163881	0.176735	0.169334	0.145378	0.105868	0.0429268	0.0564709	0.0701968	0.150598	0.105326	0.0890564	0.0824346	0.0988358	0.127361	0.157352	0.146096	0.0985811	0.126718	0.125278	0.121659	0.0840652	0.16972	0.0948055	0.137956	0.131876	0.128863	0.139202	0.129895	0.146187	0.158606	0.155008	0.164837	0.176939	0.143547	0.106209	0.159487	0.122901	0.139846	0.146201	0.153232	0.141422	0.155365
19.6534	0.175093	0.173021	0.141841	0.161504	0.162589	0.152	0.17061	0.163315	0.177061	0.169609	0.144551	0.104591	0.0419274	0.0553649	0.0689507	0.150472	0.104268	0.0879387	0.0810637	0.0975019	0.126133	0.156483	0.144987	0.0971849	0.125189	0.124126	0.12036	0.0825572	0.169321	0.093402	0.137297	0.131078	0.128571	0.138704	0.12928	0.145611	0.157866	0.154536	0.165214	0.176798	0.143173	0.105275	0.159954	0.124133	0.138969	0.146751	0.153563	0.141705	0.154542
19.6833	0.175242	0.173527	0.141695	0.161631	0.162911	0.152968	0.170911	0.162733	0.177363	0.169863	0.143722	0.103327	0.040951	0.0542829	0.0677267	0.150352	0.103221	0.0868387	0.0797141	0.0961804	0.124919	0.155611	0.143875	0.0958052	0.123665	0.122983	0.119069	0.0810755	0.16891	0.0920154	0.136634	0.130285	0.128279	0.138198	0.128667	0.145029	0.157113	0.154052	0.165574	0.176631	0.142794	0.104358	0.160405	0.125368	0.138087	0.147288	0.15388	0.141977	0.153705
19.7131	0.175365	0.174006	0.14154	0.161737	0.163216	0.153918	0.171186	0.162134	0.177642	0.170096	0.142891	0.102076	0.0399971	0.0532244	0.0665243	0.150238	0.102185	0.0857556	0.0783855	0.0948709	0.123719	0.154735	0.142761	0.0944416	0.122147	0.121847	0.117786	0.0796194	0.168486	0.0906454	0.135966	0.129497	0.127988	0.137686	0.128055	0.144439	0.156346	0.153557	0.165915	0.176439	0.142411	0.103458	0.160838	0.126605	0.1372	0.147814	0.154185	0.142238	0.152852
19.7429	0.175462	0.174458	0.141378	0.161822	0.163503	0.154851	0.171435	0.161518	0.177896	0.170309	0.142057	0.100838	0.0390648	0.0521884	0.0653429	0.150129	0.10116	0.0846887	0.0770771	0.0935732	0.122532	0.153855	0.141643	0.0930938	0.120635	0.120718	0.116512	0.0781884	0.168049	0.0892917	0.135294	0.128714	0.127698	0.137166	0.127444	0.143842	0.155565	0.153051	0.166239	0.17622	0.142023	0.102575	0.161253	0.127845	0.136308	0.148326	0.154475	0.142489	0.151985
19.7727	0.175532	0.174883	0.141207	0.161885	0.163775	0.155766	0.171657	0.160886	0.178125	0.170501	0.14122	0.0996125	0.0381536	0.0511744	0.0641817	0.150024	0.100145	0.0836372	0.0757885	0.0922869	0.121357	0.15297	0.140523	0.0917613	0.119129	0.119595	0.115245	0.076782	0.167599	0.087954	0.134617	0.127934	0.127407	0.136638	0.126833	0.143238	0.15477	0.152534	0.166544	0.175976	0.141629	0.101712	0.161649	0.129085	0.135411	0.148826	0.154752	0.142728	0.151103
19.8025	0.175576	0.17528	0.141028	0.161927	0.164029	0.156662	0.171852	0.160238	0.17833	0.170672	0.140379	0.0983987	0.0372629	0.0501815	0.0630403	0.149922	0.0991391	0.0826005	0.0745192	0.0910116	0.120194	0.15208	0.139399	0.0904438	0.117629	0.11848	0.113986	0.0753994	0.167135	0.0866319	0.133935	0.127157	0.127116	0.136103	0.126222	0.142627	0.153962	0.152005	0.166832	0.175705	0.141231	0.100867	0.162027	0.130327	0.134509	0.149312	0.155014	0.142956	0.150207
19.8323	0.175593	0.17565	0.14084	0.161947	0.164266	0.157539	0.17202	0.159573	0.178509	0.170822	0.139535	0.0971964	0.0363919	0.0492092	0.061918	0.149822	0.098143	0.0815778	0.0732685	0.0897472	0.119042	0.151184	0.138273	0.089141	0.116135	0.117371	0.112735	0.0740401	0.166656	0.0853252	0.133248	0.126383	0.126823	0.13556	0.125611	0.142009	0.15314	0.151466	0.167102	0.175409	0.140826	0.100043	0.162385	0.131569	0.133601	0.149784	0.155261	0.143172	0.149297
19.8621	0.175584	0.175992	0.140645	0.161946	0.164487	0.158396	0.172161	0.158893	0.178663	0.17095	0.138686	0.0960052	0.0355401	0.0482567	0.0608143	0.149723	0.097156	0.0805684	0.0720361	0.0884933	0.117899	0.150282	0.137143	0.0878526	0.114647	0.116268	0.111492	0.0727037	0.166164	0.0840336	0.132557	0.12561	0.126529	0.135009	0.124997	0.141383	0.152304	0.150915	0.167353	0.175086	0.140416	0.09924	0.162724	0.13281	0.132687	0.150242	0.155494	0.143377	0.148374
19.8919	0.175549	0.176308	0.14044	0.161922	0.164691	0.159233	0.172275	0.158196	0.178792	0.171056	0.137834	0.0948249	0.034707	0.0473234	0.0597287	0.149623	0.0961777	0.0795717	0.0708215	0.0872497	0.116766	0.149374	0.136011	0.0865782	0.113165	0.115171	0.110257	0.0713894	0.165656	0.0827568	0.13186	0.124838	0.126232	0.13445	0.124382	0.140751	0.151455	0.150353	0.167587	0.174738	0.14	0.0984588	0.163043	0.13405	0.131768	0.150685	0.155711	0.14357	0.147437
19.9217	0.175487	0.176595	0.140228	0.161877	0.164877	0.16005	0.172362	0.157484	0.178894	0.171141	0.136976	0.093655	0.0338919	0.0464087	0.0586606	0.149523	0.0952078	0.0785871	0.0696241	0.086016	0.115641	0.148459	0.134875	0.0853174	0.11169	0.11408	0.109029	0.0700968	0.165133	0.0814944	0.131159	0.124067	0.125933	0.133883	0.123765	0.140111	0.150593	0.149781	0.167802	0.174363	0.139578	0.0977002	0.163342	0.135289	0.130843	0.151113	0.155912	0.143751	0.146486
19.9515	0.175399	0.176856	0.140007	0.16181	0.165047	0.160845	0.172422	0.156756	0.17897	0.171203	0.136113	0.0924952	0.0330945	0.045512	0.0576097	0.14942	0.0942459	0.077614	0.0684436	0.0847922	0.114524	0.147536	0.133736	0.08407	0.11022	0.112995	0.107808	0.0688253	0.164595	0.0802464	0.130452	0.123295	0.12563	0.133308	0.123145	0.139464	0.149718	0.149196	0.167999	0.173963	0.139149	0.0969651	0.16362	0.136526	0.129912	0.151526	0.156097	0.14392	0.145522
19.9813	0.175285	0.17709	0.139778	0.16172	0.1652	0.16162	0.172454	0.156012	0.179019	0.171242	0.135245	0.0913452	0.0323141	0.0446328	0.0565753	0.149314	0.0932919	0.0766517	0.0672794	0.083578	0.113414	0.146606	0.132594	0.0828357	0.108757	0.111916	0.106594	0.0675745	0.164041	0.0790124	0.12974	0.122523	0.125324	0.132725	0.122521	0.13881	0.148829	0.148601	0.168177	0.173537	0.138713	0.0962543	0.163877	0.13776	0.128975	0.151923	0.156265	0.144077	0.144546
20.0111	0.175145	0.177296	0.139541	0.161609	0.165335	0.162372	0.172458	0.155254	0.179041	0.171259	0.134372	0.0902048	0.0315504	0.0437705	0.0555572	0.149204	0.0923454	0.0756998	0.0661313	0.0823732	0.11231	0.145668	0.131448	0.0816142	0.107301	0.110841	0.105388	0.0663438	0.163471	0.0777921	0.129023	0.121749	0.125014	0.132134	0.121894	0.138149	0.147928	0.147995	0.168337	0.173085	0.138271	0.0955685	0.164112	0.13899	0.128033	0.152305	0.156417	0.144222	0.143557
20.0409	0.174979	0.177475	0.139295	0.161476	0.165453	0.163102	0.172435	0.15448	0.179037	0.171253	0.133493	0.0890736	0.0308029	0.0429247	0.0545548	0.149089	0.0914061	0.0747577	0.0649988	0.0811776	0.111212	0.144722	0.1303	0.0804052	0.105851	0.109772	0.104188	0.0651328	0.162884	0.0765855	0.1283	0.120973	0.124698	0.131534	0.121263	0.13748	0.147014	0.147378	0.168478	0.172606	0.13782	0.0949083	0.164326	0.140216	0.127084	0.15267	0.156551	0.144355	0.142556
20.0707	0.174787	0.177627	0.139041	0.16132	0.165554	0.16381	0.172385	0.153691	0.179005	0.171225	0.132607	0.0879513	0.0300711	0.0420947	0.0535678	0.148967	0.0904737	0.073825	0.0638815	0.0799911	0.110119	0.143767	0.129148	0.0792086	0.104407	0.108708	0.102995	0.063941	0.162281	0.0753921	0.127572	0.120195	0.124378	0.130926	0.120627	0.136804	0.146088	0.146749	0.1686	0.172103	0.137363	0.0942745	0.164518	0.141437	0.126129	0.153018	0.156668	0.144476	0.141543
20.1005	0.174569	0.177752	0.138778	0.161143	0.165636	0.164494	0.172307	0.152888	0.178945	0.171173	0.131716	0.0868378	0.0293546	0.0412802	0.0525957	0.148838	0.089548	0.0729011	0.062779	0.0788135	0.10903	0.142804	0.127994	0.0780239	0.102971	0.107649	0.101809	0.062768	0.161661	0.074212	0.126839	0.119415	0.124052	0.13031	0.119985	0.13612	0.14515	0.146109	0.168703	0.171573	0.136898	0.0936673	0.164687	0.142652	0.125169	0.153349	0.156768	0.144584	0.140517
20.1303	0.174325	0.177851	0.138507	0.160944	0.165701	0.165155	0.172201	0.15207	0.178858	0.171097	0.130818	0.0857328	0.0286531	0.0404807	0.0516383	0.148702	0.0886288	0.0719857	0.0616912	0.0776448	0.107946	0.141831	0.126836	0.0768511	0.101541	0.106594	0.10063	0.0616134	0.161024	0.0730448	0.126101	0.118631	0.12372	0.129685	0.119339	0.135429	0.144199	0.145458	0.168786	0.171018	0.136424	0.0930872	0.164835	0.143862	0.124202	0.153663	0.156849	0.14468	0.139481
20.1601	0.174055	0.177922	0.138227	0.160722	0.165747	0.165792	0.172068	0.151237	0.178743	0.170999	0.129913	0.084636	0.0279662	0.0396958	0.0506952	0.148556	0.0877158	0.0710783	0.0606175	0.0764848	0.106864	0.14085	0.125675	0.0756899	0.100119	0.105544	0.0994575	0.0604767	0.16037	0.0718904	0.125357	0.117843	0.123382	0.129052	0.118686	0.134731	0.143237	0.144796	0.168849	0.170438	0.135943	0.0925344	0.164959	0.145064	0.123229	0.153959	0.156911	0.144763	0.138433
20.1899	0.17376	0.177967	0.137938	0.160479	0.165775	0.166405	0.171907	0.150391	0.178599	0.170877	0.129001	0.0835473	0.0272935	0.038925	0.0497661	0.148401	0.0868089	0.0701787	0.0595578	0.0753335	0.105786	0.139858	0.12451	0.0745401	0.0987038	0.104499	0.0982912	0.0593575	0.159698	0.0707487	0.124609	0.117051	0.123037	0.128411	0.118027	0.134025	0.142263	0.144123	0.168893	0.169833	0.135452	0.0920089	0.16506	0.146258	0.122251	0.154238	0.156955	0.144834	0.137374
20.2197	0.173439	0.177985	0.137641	0.160214	0.165784	0.166993	0.171719	0.149531	0.178428	0.170731	0.128082	0.0824665	0.0266347	0.0381681	0.0488507	0.148235	0.0859078	0.0692863	0.0585117	0.0741907	0.10471	0.138858	0.123343	0.0734016	0.097296	0.103458	0.0971313	0.0582555	0.159009	0.0696194	0.123854	0.116255	0.122685	0.127761	0.117362	0.133311	0.141277	0.143439	0.168916	0.169202	0.134953	0.0915106	0.165138	0.147445	0.121267	0.154498	0.15698	0.144893	0.136305
20.2495	0.173093	0.177977	0.137335	0.159928	0.165774	0.167556	0.171504	0.148657	0.178228	0.170562	0.127156	0.0813934	0.0259895	0.0374245	0.0479487	0.148058	0.0850123	0.068401	0.057479	0.0730565	0.103635	0.137848	0.122173	0.0722741	0.0958957	0.102421	0.0959776	0.0571704	0.158302	0.0685024	0.123095	0.115454	0.122325	0.127103	0.11669	0.13259	0.140281	0.142744	0.168918	0.168547	0.134446	0.0910392	0.165193	0.148622	0.120277	0.15474	0.156986	0.144939	0.135225
20.2793	0.172721	0.177942	0.13702	0.159619	0.165744	0.168094	0.171261	0.147771	0.177999	0.170369	0.126223	0.0803279	0.0253575	0.036694	0.0470598	0.14787	0.0841224	0.0675225	0.0564594	0.0719307	0.102563	0.136828	0.121	0.0711576	0.0945031	0.101389	0.0948302	0.0561018	0.157577	0.0673976	0.122331	0.114648	0.121957	0.126437	0.11601	0.131861	0.139273	0.142038	0.168898	0.167866	0.133929	0.0905943	0.165224	0.149789	0.119281	0.154964	0.156972	0.144972	0.134135
20.3091	0.172324	0.177881	0.136697	0.15929	0.165693	0.168606	0.170991	0.146871	0.177742	0.170152	0.125282	0.0792698	0.0247386	0.0359762	0.0461838	0.147668	0.0832377	0.0666504	0.0554527	0.0708134	0.101492	0.135798	0.119825	0.0700518	0.0931184	0.100361	0.0936889	0.0550493	0.156834	0.0663049	0.121561	0.113837	0.12158	0.125763	0.115324	0.131124	0.138255	0.141321	0.168857	0.167161	0.133402	0.0901752	0.165231	0.150946	0.11828	0.155168	0.156939	0.144993	0.133035
20.3389	0.171902	0.177794	0.136365	0.158938	0.165623	0.169092	0.170694	0.145958	0.177456	0.169912	0.124334	0.078219	0.0241323	0.0352708	0.0453205	0.147454	0.0823583	0.0657845	0.0544587	0.0697046	0.100421	0.134758	0.118646	0.0689567	0.0917416	0.0993367	0.0925537	0.0540126	0.156074	0.0652241	0.120787	0.11302	0.121195	0.125081	0.114629	0.13038	0.137227	0.140593	0.168794	0.166432	0.132866	0.0897811	0.165214	0.152092	0.117274	0.155353	0.156886	0.145001	0.131926
20.3687	0.171456	0.177681	0.136023	0.158566	0.165531	0.169552	0.170371	0.145033	0.177141	0.169647	0.123379	0.0771754	0.0235385	0.0345775	0.0444696	0.147225	0.0814839	0.0649247	0.0534772	0.0686042	0.0993513	0.133709	0.117465	0.0678721	0.090373	0.0983169	0.0914245	0.0529915	0.155295	0.0641551	0.120007	0.112198	0.120801	0.124392	0.113927	0.129628	0.136189	0.139855	0.168708	0.165679	0.132321	0.089411	0.165173	0.153226	0.116262	0.155519	0.156813	0.144996	0.130807
20.3985	0.170984	0.177541	0.135673	0.158173	0.165419	0.169985	0.17002	0.144096	0.176797	0.169359	0.122416	0.0761389	0.0229568	0.033896	0.043631	0.146982	0.0806145	0.0640708	0.0525079	0.0675123	0.0982818	0.13265	0.116282	0.0667979	0.0890127	0.0973011	0.0903012	0.0519856	0.154498	0.0630978	0.119223	0.111369	0.120398	0.123694	0.113216	0.128868	0.135141	0.139105	0.1686	0.164902	0.131765	0.0890637	0.165108	0.154347	0.115245	0.155665	0.156719	0.144979	0.12968
20.4283	0.170487	0.177377	0.135313	0.157758	0.165284	0.170391	0.169643	0.143147	0.176425	0.169047	0.121445	0.0751095	0.0223872	0.0332261	0.0428044	0.146725	0.0797499	0.0632224	0.0515508	0.0664289	0.0972124	0.131581	0.115096	0.0657341	0.0876608	0.0962893	0.0891839	0.0509947	0.153683	0.0620521	0.118433	0.110534	0.119985	0.122989	0.112497	0.1281	0.134083	0.138345	0.168468	0.164102	0.131199	0.0887379	0.165018	0.155455	0.114224	0.155792	0.156605	0.144949	0.128544
20.4581	0.169966	0.177186	0.134945	0.157323	0.165127	0.17077	0.16924	0.142186	0.176023	0.168711	0.120467	0.074087	0.0218292	0.0325674	0.0419897	0.146452	0.0788901	0.0623796	0.0506056	0.065354	0.0961429	0.130503	0.113909	0.0646805	0.0863175	0.0952815	0.0880724	0.0500185	0.15285	0.0610179	0.117639	0.109693	0.119563	0.122276	0.111769	0.127324	0.133017	0.137574	0.168312	0.163278	0.130623	0.0884324	0.164904	0.156548	0.113197	0.155899	0.15647	0.144907	0.1274
20.488	0.16942	0.17697	0.134567	0.156867	0.164948	0.171121	0.16881	0.141214	0.175592	0.168351	0.119481	0.0730714	0.0212827	0.0319197	0.0411867	0.146164	0.0780349	0.0615422	0.0496722	0.0642877	0.0950731	0.129415	0.112719	0.063637	0.0849831	0.0942776	0.0869668	0.0490568	0.152	0.0599951	0.116841	0.108846	0.11913	0.121555	0.111033	0.126539	0.131941	0.136792	0.168132	0.162431	0.130037	0.0881455	0.164766	0.157627	0.112166	0.155985	0.156314	0.144851	0.126248
20.5178	0.16885	0.176728	0.13418	0.156391	0.164746	0.171444	0.168355	0.140232	0.175133	0.167967	0.118488	0.0720626	0.0207475	0.0312828	0.0403952	0.145859	0.0771843	0.0607101	0.0487504	0.06323	0.0940029	0.128318	0.111527	0.0626037	0.0836575	0.0932777	0.085867	0.0481092	0.151131	0.0589836	0.116037	0.107992	0.118687	0.120827	0.110288	0.125747	0.130857	0.136	0.167927	0.161561	0.12944	0.0878758	0.164603	0.15869	0.111131	0.156052	0.156137	0.144783	0.125088
20.5476	0.168255	0.176461	0.133783	0.155895	0.16452	0.171739	0.167874	0.139238	0.174644	0.16756	0.117487	0.0710606	0.0202233	0.0306565	0.0396151	0.145538	0.0763382	0.0598832	0.0478402	0.062181	0.0929321	0.127211	0.110334	0.0615804	0.0823409	0.0922817	0.0847729	0.0471757	0.150245	0.0579833	0.11523	0.107132	0.118233	0.120093	0.109535	0.124947	0.129765	0.135198	0.167697	0.160669	0.128833	0.0876215	0.164416	0.159737	0.110092	0.156098	0.155939	0.144703	0.123921
20.5774	0.167637	0.176168	0.133377	0.155378	0.164271	0.172006	0.167368	0.138235	0.174126	0.167129	0.116479	0.0700654	0.01971	0.0300405	0.0388462	0.145201	0.0754966	0.0590614	0.0469413	0.0611406	0.0918607	0.126095	0.109139	0.060567	0.0810336	0.0912895	0.0836846	0.0462558	0.149341	0.0569942	0.114417	0.106265	0.117769	0.119351	0.108772	0.124139	0.128666	0.134385	0.167442	0.159755	0.128214	0.0873811	0.164204	0.160768	0.109048	0.156124	0.15572	0.144609	0.122747
20.6072	0.166994	0.175851	0.132962	0.154842	0.163998	0.172245	0.166836	0.137221	0.17358	0.166674	0.115463	0.069077	0.0192074	0.0294347	0.0380885	0.144846	0.0746593	0.0582446	0.0460537	0.0601091	0.0907886	0.124971	0.107943	0.0595636	0.0797356	0.0903012	0.0826021	0.0453495	0.14842	0.0560161	0.113601	0.105391	0.117294	0.118602	0.108	0.123322	0.127558	0.133562	0.167161	0.158819	0.127585	0.0871529	0.163968	0.16178	0.108001	0.156129	0.15548	0.144503	0.121567
20.637	0.166328	0.175509	0.132537	0.154287	0.1637	0.172454	0.166279	0.136198	0.173005	0.166196	0.11444	0.0680952	0.0187152	0.0288388	0.0373417	0.144475	0.0738264	0.0574328	0.0451773	0.0590864	0.0897157	0.123837	0.106746	0.0585702	0.0784471	0.0893167	0.0815253	0.0444565	0.147481	0.055049	0.11278	0.104512	0.116807	0.117846	0.10722	0.122498	0.126444	0.132729	0.166854	0.157862	0.126945	0.0869352	0.163707	0.162774	0.106951	0.156114	0.155218	0.144384	0.12038
20.6668	0.165638	0.175141	0.132102	0.153712	0.163378	0.172634	0.165698	0.135165	0.172401	0.165694	0.11341	0.0671202	0.0182334	0.0282526	0.0366058	0.144086	0.0729979	0.056626	0.0443119	0.0580727	0.0886421	0.122695	0.105548	0.0575865	0.0771682	0.0883361	0.0804543	0.0435766	0.146525	0.0540929	0.111956	0.103625	0.11631	0.117084	0.10643	0.121665	0.125323	0.131886	0.16652	0.156883	0.126293	0.0867264	0.163421	0.163749	0.105897	0.156078	0.154934	0.144253	0.119188
20.6966	0.164925	0.17475	0.131658	0.153117	0.16303	0.172786	0.165093	0.134124	0.171768	0.165169	0.112373	0.0661519	0.0177617	0.027676	0.0358806	0.14368	0.0721736	0.0558242	0.0434575	0.057068	0.0875677	0.121545	0.104349	0.0566127	0.075899	0.0873592	0.079389	0.0427096	0.145553	0.0531476	0.111127	0.102732	0.115801	0.116316	0.105632	0.120823	0.124195	0.131033	0.166161	0.155884	0.125631	0.0865248	0.163111	0.164705	0.10484	0.156021	0.154629	0.144108	0.11799
20.7264	0.164188	0.174333	0.131203	0.152504	0.162658	0.172907	0.164463	0.133074	0.171107	0.164621	0.111329	0.0651903	0.0172999	0.0271088	0.035166	0.143255	0.0713536	0.0550273	0.042614	0.0560723	0.0864926	0.120387	0.103149	0.0556487	0.0746397	0.0863861	0.0783295	0.0418554	0.144563	0.0522132	0.110295	0.101833	0.11528	0.115541	0.104824	0.119974	0.123061	0.13017	0.165774	0.154865	0.124957	0.086329	0.162776	0.16564	0.10378	0.155943	0.154303	0.143951	0.116787
20.7562	0.163429	0.173892	0.130739	0.151873	0.162259	0.173	0.16381	0.132015	0.170418	0.164049	0.110279	0.0642354	0.0168479	0.0265509	0.034462	0.142814	0.0705378	0.0542354	0.0417812	0.0550859	0.0854169	0.11922	0.10195	0.0546945	0.0733904	0.0854169	0.0772757	0.0410137	0.143558	0.0512894	0.109458	0.100928	0.114748	0.11476	0.104008	0.119116	0.121921	0.129297	0.165361	0.153825	0.124272	0.0861375	0.162418	0.166554	0.102718	0.155845	0.153954	0.143781	0.115579
20.786	0.162646	0.173427	0.130265	0.151223	0.161836	0.173062	0.163133	0.130948	0.1697	0.163455	0.109221	0.0632873	0.0164056	0.026002	0.0337683	0.142354	0.0697262	0.0534484	0.0409592	0.0541086	0.0843405	0.118047	0.10075	0.0537501	0.0721512	0.0844513	0.0762277	0.0401844	0.142536	0.0503763	0.108618	0.100016	0.114204	0.113974	0.103183	0.118251	0.120776	0.128415	0.16492	0.152766	0.123576	0.0859488	0.162035	0.167446	0.101653	0.155725	0.153584	0.143597	0.114366
20.8158	0.161841	0.172937	0.129781	0.150555	0.161386	0.173095	0.162434	0.129874	0.168954	0.162838	0.108158	0.0623459	0.0159727	0.0254621	0.033085	0.141877	0.0689189	0.0526664	0.0401479	0.0531408	0.0832636	0.116865	0.0995499	0.0528154	0.0709222	0.0834895	0.0751856	0.0393673	0.141498	0.0494739	0.107775	0.0990989	0.113649	0.113181	0.102349	0.117376	0.119626	0.127524	0.164452	0.151688	0.122869	0.0857615	0.161627	0.168315	0.100587	0.155585	0.153193	0.143401	0.11315
20.8456	0.161014	0.172424	0.129286	0.149869	0.16091	0.173097	0.161711	0.128792	0.168181	0.162198	0.107088	0.0614113	0.0155491	0.0249309	0.0324119	0.141381	0.0681157	0.0518894	0.0393471	0.0521823	0.0821863	0.115677	0.0983504	0.0518905	0.0697035	0.0825315	0.0741492	0.0385622	0.140445	0.048582	0.106928	0.0981754	0.113082	0.112383	0.101507	0.116494	0.118471	0.126623	0.163957	0.150592	0.12215	0.0855745	0.161196	0.169162	0.0995187	0.155424	0.152779	0.143192	0.11193
20.8754	0.160164	0.171886	0.128782	0.149165	0.160409	0.173069	0.160967	0.127703	0.167379	0.161536	0.106013	0.0604834	0.0151347	0.0244085	0.0317489	0.140868	0.0673168	0.0511175	0.0385569	0.0512334	0.0811088	0.114483	0.0971515	0.0509753	0.0684953	0.0815772	0.0731187	0.0377691	0.139376	0.0477006	0.106077	0.0972463	0.112503	0.11158	0.100656	0.115604	0.117311	0.125713	0.163435	0.149477	0.12142	0.0853866	0.160741	0.169984	0.098449	0.155242	0.152344	0.14297	0.110706
20.9052	0.159293	0.171325	0.128267	0.148444	0.159881	0.173011	0.160201	0.126608	0.166551	0.160851	0.104931	0.0595624	0.0147292	0.0238945	0.0310959	0.140337	0.0665221	0.0503506	0.0377771	0.050294	0.080031	0.113281	0.0959533	0.0500699	0.0672976	0.0806266	0.0720941	0.0369877	0.138293	0.0468296	0.105224	0.0963116	0.111913	0.110772	0.0997973	0.114705	0.116148	0.124795	0.162885	0.148344	0.120678	0.0851965	0.160262	0.170782	0.097378	0.155039	0.151888	0.142735	0.10948
20.935	0.1584	0.17074	0.127742	0.147706	0.159327	0.172923	0.159413	0.125505	0.165695	0.160144	0.103844	0.0586483	0.0143327	0.0233889	0.0304528	0.139787	0.0657315	0.0495889	0.0370077	0.0493643	0.0789533	0.112074	0.0947561	0.0491742	0.0661106	0.0796797	0.0710755	0.0362179	0.137194	0.0459691	0.104367	0.0953716	0.111311	0.109959	0.0989303	0.113798	0.11498	0.123867	0.162307	0.147193	0.119926	0.0850034	0.15976	0.171555	0.0963061	0.154816	0.15141	0.142487	0.108251
20.9648	0.157485	0.170131	0.127207	0.146951	0.158746	0.172804	0.158604	0.124397	0.164812	0.159415	0.102752	0.057741	0.0139448	0.0228916	0.0298196	0.139221	0.0649452	0.0488324	0.0362486	0.0484443	0.0778758	0.110861	0.09356	0.0482882	0.0649344	0.0787365	0.0700627	0.0354596	0.136082	0.0451189	0.103507	0.0944263	0.110698	0.109141	0.0980554	0.112884	0.113809	0.122931	0.161703	0.146026	0.119162	0.0848062	0.159234	0.172302	0.0952334	0.154572	0.15091	0.142225	0.107019
20.9946	0.15655	0.169499	0.126661	0.14618	0.15814	0.172655	0.157774	0.123282	0.163902	0.158665	0.101655	0.0568407	0.0135656	0.0224025	0.0291961	0.138636	0.0641631	0.0480811	0.0354999	0.0475342	0.0767986	0.109642	0.0923654	0.047412	0.0637689	0.077797	0.069056	0.0347126	0.134955	0.0442791	0.102644	0.0934762	0.110073	0.108318	0.0971729	0.111961	0.112635	0.121987	0.161071	0.144842	0.118387	0.0846042	0.158685	0.173023	0.0941603	0.154307	0.150389	0.14195	0.105786
21.0244	0.155593	0.168844	0.126105	0.145392	0.157507	0.172475	0.156924	0.122162	0.162966	0.157893	0.100553	0.0559473	0.0131947	0.0219214	0.0285823	0.138034	0.0633853	0.0473351	0.0347614	0.0466339	0.075722	0.108418	0.0911724	0.0465455	0.0626145	0.0768612	0.0680554	0.0339769	0.133815	0.0434495	0.101778	0.0925213	0.109438	0.107491	0.0962829	0.111031	0.111458	0.121034	0.160412	0.143642	0.117601	0.0843964	0.158113	0.173717	0.0930871	0.154022	0.149847	0.141662	0.104552
21.0542	0.154616	0.168166	0.125538	0.144588	0.156849	0.172265	0.156054	0.121036	0.162003	0.157099	0.0994459	0.0550609	0.0128322	0.0214482	0.027978	0.137414	0.0626117	0.0465945	0.0340331	0.0457436	0.0746462	0.107189	0.0899812	0.0456887	0.061471	0.0759291	0.0670608	0.0332523	0.132661	0.0426301	0.100909	0.0915619	0.108791	0.10666	0.0953858	0.110093	0.110278	0.120074	0.159726	0.142426	0.116804	0.0841823	0.157518	0.174382	0.0920139	0.153716	0.149284	0.14136	0.103316
21.084	0.153619	0.167465	0.124961	0.143769	0.156164	0.172025	0.155165	0.119906	0.161015	0.156284	0.0983351	0.0541815	0.0124778	0.0209829	0.0273832	0.136776	0.0618424	0.0458594	0.033315	0.0448634	0.0735713	0.105956	0.0887922	0.0448417	0.0603387	0.0750007	0.0660724	0.0325387	0.131495	0.0418209	0.100038	0.0905982	0.108133	0.105824	0.0944817	0.109147	0.109096	0.119105	0.159013	0.141196	0.115997	0.0839611	0.156901	0.17502	0.0909411	0.15339	0.148699	0.141045	0.10208
21.1138	0.152602	0.16674	0.124373	0.142934	0.155454	0.171753	0.154256	0.11877	0.160001	0.155448	0.0972202	0.0533093	0.0121315	0.0205252	0.0267979	0.136122	0.0610774	0.0451297	0.032607	0.0439932	0.0724977	0.104718	0.0876054	0.0440045	0.0592176	0.074076	0.0650902	0.031836	0.130316	0.0410218	0.0991635	0.0896305	0.107464	0.104985	0.093571	0.108194	0.107912	0.118129	0.158273	0.13995	0.115178	0.0837324	0.156261	0.175628	0.0898689	0.153044	0.148094	0.140716	0.100843
21.1436	0.151566	0.165994	0.123775	0.142084	0.154717	0.171452	0.15333	0.11763	0.158962	0.154592	0.0961016	0.0524441	0.011793	0.0200753	0.0262218	0.13545	0.0603166	0.0444057	0.031909	0.0431332	0.0714256	0.103477	0.0864212	0.0431769	0.0581079	0.073155	0.0641143	0.0311441	0.129125	0.0402328	0.0982867	0.0886591	0.106786	0.104142	0.0926538	0.107233	0.106726	0.117146	0.157507	0.13869	0.114349	0.0834954	0.155599	0.176207	0.0887975	0.152678	0.147468	0.140373	0.0996063
21.1734	0.150511	0.165224	0.123166	0.141219	0.153956	0.171119	0.152385	0.116486	0.157899	0.153715	0.0949797	0.0515861	0.0114623	0.0196328	0.025655	0.134761	0.0595602	0.0436873	0.0312211	0.0422835	0.0703551	0.102232	0.0852397	0.0423592	0.0570095	0.0722377	0.0631447	0.0304628	0.127922	0.0394539	0.0974074	0.0876842	0.106097	0.103296	0.0917306	0.106265	0.105539	0.116156	0.156715	0.137417	0.11351	0.0832499	0.154916	0.176755	0.0877274	0.152291	0.146821	0.140016	0.0983699
21.2032	0.149436	0.164433	0.122547	0.140339	0.153169	0.170757	0.151422	0.115337	0.15681	0.152817	0.0938547	0.0507353	0.0111392	0.0191978	0.0250973	0.134055	0.0588082	0.0429746	0.0305431	0.041444	0.0692867	0.100984	0.0840612	0.0415512	0.0559225	0.0713242	0.0621815	0.0297922	0.126708	0.038685	0.0965256	0.0867061	0.105398	0.102447	0.0908016	0.105291	0.104351	0.115158	0.155896	0.13613	0.11266	0.0829954	0.154211	0.177273	0.0866586	0.151885	0.146154	0.139645	0.0971343
21.233	0.148343	0.163619	0.121917	0.139445	0.152357	0.170364	0.150442	0.114185	0.155698	0.1519	0.0927269	0.0498918	0.0108237	0.0187701	0.0245487	0.133333	0.0580606	0.0422677	0.0298751	0.0406149	0.0682204	0.0997331	0.082886	0.0407529	0.0548472	0.0704143	0.0612247	0.0291321	0.125483	0.037926	0.0956415	0.0857251	0.10469	0.101594	0.0898672	0.104309	0.103162	0.114154	0.155052	0.134831	0.1118	0.0827316	0.153484	0.177759	0.0855915	0.15146	0.145466	0.13926	0.0958998
21.2629	0.147233	0.162783	0.121276	0.138536	0.151521	0.169942	0.149445	0.113029	0.154561	0.150963	0.0915966	0.0490556	0.0105155	0.0183497	0.024009	0.132594	0.0573173	0.0415667	0.029217	0.0397961	0.0671567	0.0984797	0.0817141	0.0399645	0.0537834	0.0695083	0.0602744	0.0284824	0.124248	0.037177	0.0947551	0.0847414	0.103973	0.100738	0.0889276	0.103321	0.101973	0.113144	0.154183	0.133519	0.110931	0.0824581	0.152737	0.178213	0.0845263	0.151015	0.144758	0.138861	0.0946667
21.2927	0.146104	0.161926	0.120624	0.137614	0.15066	0.169489	0.148433	0.11187	0.153402	0.150006	0.0904642	0.0482267	0.0102145	0.0179365	0.0234782	0.131839	0.0565786	0.0408717	0.0285687	0.0389878	0.0660958	0.0972241	0.0805459	0.0391858	0.0527314	0.068606	0.0593308	0.027843	0.123003	0.0364379	0.0938665	0.0837553	0.103246	0.0998799	0.0879832	0.102326	0.100783	0.112127	0.153289	0.132195	0.110051	0.0821747	0.151968	0.178634	0.0834632	0.15055	0.144031	0.138448	0.0934355
21.3225	0.144959	0.161046	0.119962	0.136679	0.149776	0.169006	0.147404	0.110708	0.152219	0.14903	0.0893299	0.0474052	0.00992073	0.0175304	0.0229563	0.131067	0.0558442	0.0401827	0.0279302	0.0381899	0.065038	0.0959668	0.0793816	0.0384168	0.0516911	0.0677076	0.0583937	0.0272139	0.121748	0.0357086	0.0929757	0.0827672	0.102512	0.099019	0.0870343	0.101325	0.0995938	0.111104	0.152371	0.13086	0.109162	0.0818813	0.15118	0.179022	0.0824026	0.150067	0.143284	0.138019	0.0922064
21.3523	0.143796	0.160146	0.11929	0.13573	0.148867	0.168494	0.14636	0.109543	0.151015	0.148035	0.0881942	0.0465911	0.00963393	0.0171313	0.0224431	0.13028	0.0551144	0.0394997	0.0273015	0.0374025	0.0639835	0.094708	0.0782214	0.0376577	0.0506627	0.066813	0.0574634	0.0265949	0.120484	0.0349892	0.0920828	0.0817774	0.10177	0.0981556	0.0860813	0.100318	0.0984045	0.110076	0.151428	0.129515	0.108264	0.0815775	0.150371	0.179377	0.0813446	0.149564	0.142518	0.137577	0.0909799
21.3821	0.142618	0.159224	0.118607	0.134768	0.147936	0.167953	0.145301	0.108375	0.149788	0.147022	0.0870573	0.0457845	0.009354	0.0167391	0.0219385	0.129476	0.0543891	0.038823	0.0266826	0.0366257	0.0629327	0.0934482	0.0770654	0.0369083	0.0496462	0.0659223	0.0565399	0.025986	0.119212	0.0342795	0.091188	0.0807861	0.101019	0.09729	0.0851245	0.0993057	0.0972157	0.109042	0.150462	0.128159	0.107357	0.0812634	0.149543	0.179697	0.0802896	0.149043	0.141732	0.137119	0.0897562
21.4119	0.141423	0.158281	0.117913	0.133793	0.146981	0.167382	0.144228	0.107205	0.14854	0.14599	0.0859195	0.0449855	0.00908083	0.0163537	0.0214425	0.128658	0.0536684	0.0381524	0.0260733	0.0358594	0.0618858	0.0921877	0.0759141	0.0361686	0.0486417	0.0650355	0.0556233	0.0253872	0.117931	0.0335796	0.0902913	0.0797937	0.100262	0.0964223	0.0841643	0.0982877	0.0960277	0.108004	0.149473	0.126793	0.106441	0.0809387	0.148695	0.179982	0.0792377	0.148504	0.140928	0.136647	0.0885357
21.4417	0.140213	0.157318	0.117209	0.132807	0.146005	0.166782	0.143141	0.106033	0.147271	0.14494	0.0847813	0.044194	0.00881431	0.0159752	0.0209549	0.127824	0.0529523	0.0374882	0.0254736	0.0351037	0.0608431	0.0909268	0.0747675	0.0354388	0.0476492	0.0641527	0.0547136	0.0247983	0.116643	0.0328894	0.0893927	0.0788004	0.099498	0.0955528	0.0832011	0.0972644	0.0948409	0.10696	0.148462	0.125418	0.105517	0.0806034	0.147829	0.180232	0.0781891	0.147946	0.140105	0.13616	0.0873188
21.4715	0.138988	0.156334	0.116494	0.131808	0.145006	0.166154	0.14204	0.104859	0.145981	0.143873	0.083643	0.0434102	0.0085543	0.0156033	0.0204757	0.126975	0.0522408	0.0368303	0.0248836	0.0343586	0.059805	0.0896659	0.0736259	0.0347187	0.0466688	0.063274	0.0538109	0.0242193	0.115347	0.0322089	0.0884924	0.0778066	0.0987274	0.0946815	0.0822353	0.0962363	0.0936553	0.105912	0.147428	0.124035	0.104584	0.0802575	0.146943	0.180446	0.0771442	0.14737	0.139264	0.135657	0.0861057
21.5013	0.137748	0.15533	0.115769	0.130797	0.143987	0.165497	0.140927	0.103684	0.144671	0.142788	0.0825048	0.042634	0.0083007	0.0152381	0.0200049	0.126111	0.051534	0.0361788	0.0243031	0.0336241	0.0587717	0.0884054	0.0724895	0.0340083	0.0457006	0.0623993	0.0529153	0.0236501	0.114045	0.031538	0.0875904	0.0768126	0.0979507	0.0938086	0.0812671	0.0952035	0.0924714	0.104859	0.146373	0.122643	0.103643	0.079901	0.14604	0.180624	0.0761031	0.146776	0.138405	0.13514	0.0848968
21.5311	0.136495	0.154305	0.115034	0.129775	0.142947	0.164812	0.139801	0.102507	0.143342	0.141686	0.0813672	0.0418655	0.00805339	0.0148794	0.0195423	0.125232	0.0508319	0.0355339	0.0237321	0.0329002	0.0577436	0.0871456	0.0713585	0.0333078	0.0447445	0.0615287	0.0520269	0.0230907	0.112736	0.0308767	0.0866868	0.0758187	0.0971684	0.0929344	0.0802969	0.0941664	0.0912893	0.103803	0.145297	0.121244	0.102695	0.0795339	0.145118	0.180765	0.0750662	0.146165	0.137528	0.134607	0.0836924
21.5609	0.135228	0.153262	0.114288	0.128742	0.141886	0.164099	0.138663	0.101329	0.141995	0.140567	0.0802305	0.0411048	0.00781225	0.0145271	0.0190878	0.12434	0.0501345	0.0348954	0.0231705	0.0321869	0.0567209	0.0858869	0.0702332	0.0326169	0.0438008	0.0606624	0.0511458	0.022541	0.111422	0.030225	0.0857818	0.0748252	0.0963807	0.0920589	0.0793253	0.0931253	0.0901094	0.102742	0.144201	0.119838	0.101739	0.0791561	0.144179	0.180869	0.0740335	0.145536	0.136634	0.134058	0.0824928
21.5907	0.133947	0.152198	0.113532	0.127698	0.140806	0.163359	0.137513	0.10015	0.140629	0.139432	0.079095	0.0403519	0.00757716	0.0141813	0.0186413	0.123433	0.049442	0.0342636	0.0226183	0.0314842	0.0557039	0.0846297	0.0691138	0.0319358	0.0428692	0.0598003	0.050272	0.0220008	0.110102	0.0295828	0.0848754	0.0738324	0.0955879	0.0911824	0.0783524	0.0920806	0.0889318	0.101679	0.143086	0.118425	0.100776	0.0787679	0.143223	0.180935	0.0730053	0.144891	0.135723	0.133494	0.0812983
21.6205	0.132655	0.151116	0.112766	0.126643	0.139708	0.162592	0.136353	0.0989703	0.139245	0.138281	0.0779611	0.0396068	0.00734802	0.0138418	0.0182029	0.122512	0.0487542	0.0336384	0.0220755	0.0307921	0.054693	0.0833744	0.0680005	0.0312644	0.0419501	0.0589426	0.0494057	0.0214702	0.108778	0.02895	0.0839677	0.0728407	0.0947903	0.0903049	0.0773787	0.0910325	0.0877568	0.100612	0.141951	0.117006	0.0998064	0.0783692	0.14225	0.180963	0.0719818	0.144228	0.134795	0.132915	0.0801092
21.6503	0.13135	0.150014	0.11199	0.125578	0.138591	0.161799	0.135182	0.0977902	0.137845	0.137114	0.0768291	0.0388696	0.00712471	0.0135086	0.0177723	0.121578	0.0480713	0.0330199	0.021542	0.0301107	0.0536883	0.0821212	0.0668934	0.0306027	0.0410433	0.0580893	0.0485469	0.0209491	0.107449	0.0283267	0.0830589	0.0718503	0.0939882	0.0894267	0.0764046	0.0899813	0.0865847	0.0995422	0.140799	0.115582	0.0988304	0.0779601	0.141261	0.180954	0.0709633	0.143549	0.133851	0.132319	0.0789258
21.6801	0.130034	0.148894	0.111204	0.124504	0.137457	0.160979	0.134	0.0966098	0.136428	0.135933	0.0756995	0.0381403	0.00690712	0.0131815	0.0173496	0.120631	0.0473933	0.0324081	0.0210177	0.0294398	0.0526903	0.0808707	0.0657929	0.0299507	0.0401488	0.0572405	0.0476957	0.0204374	0.106116	0.0277128	0.082149	0.0708616	0.0931816	0.0885478	0.0754304	0.0889276	0.0854157	0.09847	0.13963	0.114153	0.0978482	0.0775408	0.140256	0.180905	0.06995	0.142854	0.132891	0.131708	0.0777483
21.7099	0.128707	0.147756	0.110409	0.12342	0.136306	0.160133	0.132809	0.0954294	0.134996	0.134736	0.0745724	0.0374189	0.00669515	0.0128605	0.0169345	0.119671	0.0467203	0.0318032	0.0205026	0.0287794	0.0516992	0.0796231	0.0646991	0.0293083	0.0392668	0.0563963	0.0468521	0.0199351	0.10478	0.0271083	0.0812382	0.0698749	0.0923709	0.0876685	0.0744564	0.0878715	0.0842501	0.0973955	0.138444	0.112719	0.0968603	0.0771115	0.139235	0.180818	0.068942	0.142142	0.131916	0.131081	0.0765771
21.7397	0.127369	0.1466	0.109603	0.122327	0.135138	0.159262	0.131609	0.0942493	0.133548	0.133525	0.0734483	0.0367056	0.00648867	0.0125456	0.0165272	0.118698	0.0460522	0.031205	0.0199967	0.0281296	0.0507152	0.0783788	0.0636123	0.0286756	0.0383973	0.0555568	0.0460164	0.019442	0.103441	0.026513	0.0803265	0.0688904	0.091556	0.0867889	0.0734831	0.0868135	0.0830881	0.0963192	0.137242	0.111282	0.095867	0.0766721	0.138199	0.180691	0.0679395	0.141415	0.130925	0.130438	0.0754124
21.7695	0.126021	0.145427	0.108788	0.121225	0.133956	0.158366	0.1304	0.0930696	0.132086	0.132301	0.0723276	0.0360003	0.00628758	0.0122367	0.0161273	0.117714	0.0453892	0.0306137	0.0194998	0.0274903	0.0497387	0.0771381	0.0625327	0.0280526	0.0375402	0.0547221	0.0451885	0.0189582	0.1021	0.0259271	0.0794142	0.0679085	0.090737	0.0859091	0.0725109	0.085754	0.08193	0.0952412	0.136025	0.109842	0.0948687	0.076223	0.137149	0.180525	0.0669428	0.140672	0.12992	0.129779	0.0742545
21.7993	0.124665	0.144237	0.107964	0.120115	0.132759	0.157446	0.129183	0.0918907	0.13061	0.131063	0.0712105	0.035303	0.00609179	0.0119337	0.015735	0.116717	0.0447312	0.0300293	0.0190119	0.0268615	0.0487699	0.0759016	0.0614604	0.0274391	0.0366955	0.0538923	0.0443686	0.0184835	0.100757	0.0253503	0.0785013	0.0669295	0.0899141	0.0850293	0.07154	0.0846932	0.080776	0.0941619	0.134795	0.108399	0.0938657	0.0757643	0.136085	0.180319	0.065952	0.139914	0.1289	0.129105	0.0731036
21.8291	0.123299	0.14303	0.10713	0.118997	0.131548	0.156502	0.127958	0.0907127	0.129122	0.129812	0.0700974	0.0346139	0.00590117	0.0116365	0.01535	0.115708	0.0440783	0.0294518	0.018533	0.026243	0.0478091	0.0746694	0.0603957	0.0268352	0.0358634	0.0530674	0.0435566	0.0180178	0.099412	0.0247828	0.077588	0.0659537	0.089087	0.0841496	0.0705707	0.0836317	0.0796263	0.0930816	0.133551	0.106953	0.0928583	0.0752962	0.135006	0.180074	0.0649672	0.139141	0.127867	0.128414	0.07196
21.8589	0.121925	0.141806	0.106288	0.117871	0.130324	0.155535	0.126726	0.089536	0.127621	0.128548	0.0689887	0.0339328	0.00571563	0.011345	0.0149724	0.114688	0.0434306	0.0288813	0.0180629	0.025635	0.0468566	0.073442	0.0593388	0.0262408	0.0350437	0.0522476	0.0427528	0.0175612	0.0980666	0.0242243	0.0766745	0.0649813	0.0882559	0.0832702	0.0696036	0.0825697	0.0784811	0.0920006	0.132294	0.105507	0.091847	0.0748188	0.133915	0.179789	0.0639888	0.138354	0.126819	0.127707	0.0708238
21.8887	0.120544	0.140567	0.105436	0.116738	0.129088	0.154545	0.125487	0.0883606	0.126109	0.127273	0.0678846	0.03326	0.00553506	0.0110593	0.014602	0.113658	0.0427881	0.0283177	0.0176017	0.0250373	0.0459126	0.0722197	0.0582899	0.0256559	0.0342365	0.051433	0.0419572	0.0171136	0.0967208	0.0236749	0.0757608	0.0640126	0.0874205	0.0823911	0.0686388	0.0815076	0.0773408	0.0909192	0.131026	0.104059	0.0908321	0.0743324	0.13281	0.179463	0.0630168	0.137552	0.125759	0.126984	0.0696953
21.9185	0.119155	0.139312	0.104576	0.115598	0.127841	0.153532	0.124241	0.087187	0.124586	0.125986	0.0667856	0.0325953	0.00535936	0.0107791	0.0142387	0.112616	0.0421508	0.0277611	0.0171492	0.0244499	0.0449774	0.071003	0.0572492	0.0250804	0.0334418	0.0506236	0.0411698	0.0166748	0.0953751	0.0231346	0.0748471	0.063048	0.0865808	0.0815126	0.0676767	0.0804458	0.0762056	0.0898377	0.129747	0.102611	0.089814	0.0738372	0.131693	0.179098	0.0620515	0.136736	0.124686	0.126246	0.0685748
21.9483	0.11776	0.138042	0.103707	0.114452	0.126582	0.152498	0.122989	0.0860152	0.123053	0.124688	0.0656918	0.0319388	0.00518843	0.0105045	0.0138825	0.111565	0.0415188	0.0272116	0.0167054	0.0238727	0.0440511	0.069792	0.0562168	0.0245144	0.0326595	0.0498197	0.0403908	0.0162447	0.0940299	0.0226032	0.0739336	0.0620877	0.0857367	0.0806348	0.0667176	0.0793848	0.0750756	0.0887564	0.128458	0.101163	0.0887931	0.0733335	0.130564	0.178693	0.0610929	0.135906	0.1236	0.125492	0.0674624
21.9781	0.116358	0.136758	0.102829	0.113299	0.125314	0.151443	0.121731	0.0848457	0.121511	0.123379	0.0646037	0.0312905	0.00502216	0.0102354	0.0135333	0.110503	0.0408921	0.026669	0.0162701	0.0233057	0.0431341	0.0685873	0.0551931	0.0239578	0.0318897	0.0490213	0.0396203	0.0158234	0.0926859	0.0220808	0.0730205	0.0611319	0.084888	0.0797577	0.0657619	0.0783249	0.0739512	0.0876757	0.12716	0.099716	0.0877698	0.0728214	0.129424	0.178247	0.0601412	0.135062	0.122503	0.124722	0.0663583
22.0079	0.114952	0.135459	0.101943	0.112141	0.124036	0.150368	0.120469	0.0836786	0.11996	0.122061	0.0635215	0.0306505	0.00486047	0.00997175	0.013191	0.109432	0.0402707	0.0261335	0.0158435	0.0227488	0.0422266	0.0673891	0.0541781	0.0234105	0.0311322	0.0482285	0.0388582	0.0154107	0.0913434	0.0215672	0.0721078	0.060181	0.0840346	0.0788815	0.0648098	0.0772664	0.0728325	0.0865958	0.125853	0.0982701	0.0867444	0.0723012	0.128273	0.177762	0.0591966	0.134205	0.121395	0.123936	0.0652627
22.0378	0.11354	0.134147	0.10105	0.110977	0.122749	0.149272	0.119201	0.0825141	0.118402	0.120733	0.0624456	0.0300187	0.00470325	0.00971341	0.0128555	0.108352	0.0396548	0.025605	0.0154252	0.0222019	0.0413287	0.0661977	0.053172	0.0228724	0.0303872	0.0474414	0.0381047	0.0150066	0.0900029	0.0210625	0.0711959	0.0592351	0.0831763	0.0780063	0.0638617	0.0762098	0.0717197	0.085517	0.124538	0.096826	0.0857174	0.0717732	0.127111	0.177237	0.0582592	0.133335	0.120275	0.123134	0.0641758
22.0676	0.112124	0.132822	0.100148	0.109809	0.121455	0.148158	0.117929	0.0813525	0.116836	0.119396	0.0613763	0.0293952	0.00455041	0.00946034	0.0125267	0.107263	0.0390443	0.0250836	0.0150154	0.021665	0.0404408	0.0650136	0.0521751	0.0223436	0.0296545	0.0466601	0.0373598	0.0146109	0.088665	0.0205664	0.0702848	0.0582946	0.082313	0.0771323	0.0629178	0.0751555	0.0706131	0.0844397	0.123217	0.0953842	0.084689	0.0712375	0.125939	0.176672	0.0573292	0.132452	0.119145	0.122318	0.0630978
22.0974	0.110705	0.131484	0.0992393	0.108636	0.120153	0.147025	0.116653	0.0801942	0.115265	0.118051	0.0603139	0.0287801	0.00440185	0.00921247	0.0122046	0.106166	0.0384393	0.0245692	0.0146138	0.021138	0.0395629	0.063837	0.0511874	0.021824	0.0289342	0.0458848	0.0366237	0.0142236	0.08733	0.0200791	0.0693747	0.0573597	0.0814445	0.0762595	0.0619783	0.0741038	0.0695129	0.0833641	0.121889	0.0939454	0.0836599	0.0706945	0.124757	0.176067	0.0564067	0.131557	0.118005	0.121486	0.0620288
22.1272	0.109282	0.130134	0.0983229	0.107458	0.118845	0.145873	0.115373	0.0790392	0.113688	0.116697	0.0592586	0.0281732	0.00425747	0.00896974	0.0118891	0.105061	0.0378398	0.0240618	0.0142205	0.0206207	0.0386953	0.0626683	0.0502093	0.0213134	0.0282261	0.0451156	0.0358963	0.0138446	0.0859984	0.0196004	0.0684658	0.0564307	0.0805708	0.0753882	0.0610436	0.0730551	0.0684193	0.0822905	0.120555	0.09251	0.0826302	0.0701444	0.123566	0.175423	0.0554918	0.130649	0.116856	0.120639	0.060969
22.157	0.107856	0.128772	0.0973994	0.106277	0.11753	0.144705	0.11409	0.0778879	0.112107	0.115337	0.0582107	0.0275746	0.00411718	0.00873207	0.01158	0.103948	0.0372459	0.0235614	0.0138353	0.0201132	0.0378382	0.0615077	0.0492407	0.0208119	0.0275303	0.0443525	0.0351778	0.0134738	0.0846707	0.0191303	0.0675584	0.0555077	0.0796917	0.0745182	0.060114	0.0720099	0.0673325	0.0812193	0.119216	0.0910786	0.0816004	0.0695874	0.122366	0.17474	0.0545846	0.12973	0.115697	0.119776	0.0599185
22.1868	0.106429	0.127399	0.0964691	0.105093	0.11621	0.14352	0.112805	0.0767405	0.110521	0.11397	0.0571705	0.0269843	0.0039809	0.0084994	0.0112773	0.102829	0.0366575	0.0230681	0.0134581	0.0196154	0.0369917	0.0603557	0.048282	0.0203194	0.0268466	0.0435957	0.0344682	0.0131111	0.0833474	0.0186686	0.0666525	0.0545909	0.0788072	0.0736499	0.0591896	0.0709683	0.0662527	0.0801507	0.117873	0.0896517	0.0805709	0.0690239	0.121159	0.174018	0.0536852	0.128799	0.11453	0.1189	0.0588775
22.2166	0.105	0.126016	0.0955321	0.103905	0.114885	0.14232	0.111517	0.0755973	0.108933	0.112596	0.0561384	0.0264024	0.00384853	0.00827165	0.010981	0.101702	0.0360749	0.0225818	0.0130889	0.0191271	0.036156	0.0592124	0.0473331	0.0198358	0.0261751	0.0428453	0.0337675	0.0127564	0.0820288	0.0182154	0.0657483	0.0536807	0.0779173	0.0727833	0.0582707	0.0699309	0.0651801	0.079085	0.116525	0.0882298	0.079542	0.0684541	0.119943	0.173257	0.0527938	0.127857	0.113355	0.118008	0.0578461
22.2464	0.10357	0.124623	0.0945888	0.102716	0.113555	0.141104	0.110226	0.0744585	0.107343	0.111217	0.0551144	0.0258287	0.00371998	0.00804877	0.0106909	0.100569	0.0354979	0.0221025	0.0127276	0.0186482	0.0353312	0.0580782	0.0463944	0.0193611	0.0255157	0.0421013	0.0330758	0.0124097	0.0807154	0.0177705	0.0648461	0.0527772	0.077022	0.0719184	0.0573575	0.068898	0.0641148	0.0780225	0.115175	0.0868135	0.0785143	0.0678783	0.11872	0.172459	0.0519105	0.126903	0.112172	0.117103	0.0568244
22.2762	0.10214	0.12322	0.0936394	0.101523	0.112222	0.139873	0.108934	0.0733244	0.105751	0.109833	0.054099	0.0252634	0.00359516	0.00783067	0.0104069	0.0994305	0.0349266	0.0216302	0.0123741	0.0181788	0.0345176	0.0569534	0.0454659	0.0188951	0.0248682	0.041364	0.0323932	0.0120707	0.0794077	0.0173339	0.0639461	0.0518806	0.0761214	0.0710555	0.0564503	0.06787	0.0630571	0.0769634	0.113821	0.0854032	0.0774879	0.0672967	0.11749	0.171622	0.0510353	0.125939	0.110982	0.116183	0.0558125
22.306	0.10071	0.121809	0.0926842	0.100329	0.110884	0.138629	0.107641	0.0721951	0.104159	0.108444	0.0530923	0.0247064	0.00347399	0.0076173	0.010129	0.0982864	0.0343611	0.0211649	0.0120282	0.0177185	0.0337152	0.0558383	0.0445477	0.0184378	0.0242327	0.0406333	0.0317196	0.0117395	0.0781061	0.0169056	0.0630483	0.0509912	0.0752155	0.0701945	0.0555493	0.0668472	0.0620071	0.0759082	0.112465	0.0839995	0.0764634	0.0667096	0.116254	0.170748	0.0501683	0.124964	0.109785	0.115249	0.0548105
22.3358	0.0992802	0.12039	0.0917234	0.099134	0.109544	0.137371	0.106347	0.0710711	0.102567	0.107052	0.0520946	0.0241576	0.00335638	0.00740857	0.0098571	0.0971372	0.0338014	0.0207065	0.01169	0.0172675	0.0329241	0.054733	0.04364	0.0179891	0.023609	0.0399095	0.0310551	0.0114159	0.0768109	0.0164854	0.062153	0.050109	0.0743046	0.0693356	0.0546546	0.0658299	0.060965	0.0748569	0.111107	0.0826028	0.075441	0.0661173	0.115012	0.169838	0.0493096	0.123979	0.108582	0.114303	0.0538186
22.3656	0.0978521	0.118962	0.0907574	0.0979375	0.108201	0.136101	0.105052	0.0699524	0.100976	0.105656	0.0511061	0.0236172	0.00324225	0.00720444	0.00959109	0.0959834	0.0332474	0.020255	0.0113593	0.0168255	0.0321445	0.053638	0.0427429	0.0175489	0.0229971	0.0391925	0.0303999	0.0110998	0.0755226	0.0160732	0.0612605	0.0492343	0.0733888	0.0684789	0.0537665	0.0648185	0.059931	0.07381	0.109747	0.0812136	0.0744212	0.0655201	0.113765	0.168891	0.0484593	0.122984	0.107373	0.113342	0.0528367
22.3954	0.0964258	0.117528	0.0897865	0.0967403	0.106855	0.13482	0.103757	0.0688394	0.0993864	0.104257	0.050127	0.0230849	0.00313151	0.00700482	0.00933089	0.0948254	0.0326994	0.0198105	0.011036	0.0163926	0.0313764	0.0525534	0.0418565	0.0171172	0.0223969	0.0384825	0.0297537	0.0107911	0.0742416	0.0156691	0.0603708	0.0483673	0.0724683	0.0676244	0.0528851	0.0638134	0.0589051	0.0727677	0.108385	0.0798323	0.0734043	0.0649182	0.112512	0.167908	0.0476175	0.12198	0.106159	0.112369	0.0518651
22.4252	0.0950018	0.116087	0.0888108	0.0955428	0.105508	0.133527	0.102462	0.0677322	0.0977995	0.102856	0.0491576	0.022561	0.00302409	0.00680965	0.00907642	0.0936637	0.0321572	0.0193728	0.01072	0.0159684	0.03062	0.0514794	0.0409809	0.0166939	0.0218084	0.0377795	0.0291168	0.0104897	0.0729682	0.0152728	0.0594842	0.0475081	0.0715435	0.0667722	0.0520106	0.0628148	0.0578876	0.0717302	0.107023	0.0784595	0.0723906	0.0643119	0.111256	0.16689	0.0467842	0.120966	0.10494	0.111384	0.0509037
22.455	0.0935807	0.114641	0.0878309	0.0943453	0.104159	0.132224	0.101167	0.0666312	0.0962158	0.101454	0.048198	0.0220452	0.00291989	0.00661886	0.0088276	0.0924988	0.031621	0.018942	0.0104113	0.015553	0.0298753	0.0504164	0.0401162	0.0162788	0.0212313	0.0370837	0.0284892	0.0101955	0.0717029	0.0148844	0.0586008	0.0466569	0.0706146	0.0659225	0.0511431	0.061823	0.0568786	0.0706979	0.10566	0.0770956	0.0713805	0.0637015	0.109995	0.165838	0.0459595	0.119942	0.103716	0.110386	0.0499527
22.4848	0.092163	0.113189	0.0868469	0.0931481	0.102809	0.130911	0.0998737	0.0655366	0.0946361	0.10005	0.0472484	0.0215377	0.00281885	0.00643239	0.00858435	0.091331	0.0310907	0.018518	0.0101096	0.0151463	0.0291425	0.0493645	0.0392625	0.0158719	0.0206657	0.0363951	0.0278707	0.00990836	0.070446	0.0145038	0.0577209	0.0458139	0.069682	0.0650753	0.0502829	0.0608385	0.0558782	0.0696708	0.104297	0.0757409	0.0703744	0.0630872	0.10873	0.164751	0.0451435	0.11891	0.102489	0.109377	0.0490121
22.5146	0.0907492	0.111732	0.0858591	0.0919517	0.101458	0.12959	0.098581	0.0644485	0.093061	0.0986458	0.0463091	0.0210383	0.00272088	0.00625017	0.00834658	0.0901608	0.0305663	0.0181007	0.00981505	0.0147481	0.0284214	0.048324	0.0384198	0.0154731	0.0201114	0.0357138	0.0272615	0.00962819	0.0691978	0.0141308	0.0568446	0.0449791	0.0687462	0.0642307	0.04943	0.0598615	0.0548866	0.0686494	0.102934	0.074396	0.0693726	0.0624694	0.107463	0.163631	0.0443361	0.11787	0.101259	0.108356	0.048082
22.5444	0.0893398	0.110272	0.084868	0.0907562	0.100106	0.12826	0.0972899	0.0633672	0.0914914	0.0972416	0.0453801	0.0205471	0.00262592	0.00607213	0.0081142	0.0889887	0.030048	0.0176903	0.00952738	0.0143583	0.0277123	0.0472949	0.0375883	0.0150823	0.0195684	0.0350398	0.0266616	0.00935486	0.0679587	0.0137653	0.0559721	0.0441527	0.0678075	0.0633888	0.0485847	0.0588923	0.0539038	0.0676339	0.101571	0.0730612	0.0683754	0.0618483	0.106192	0.162479	0.0435374	0.116821	0.100025	0.107324	0.0471624
22.5742	0.0879354	0.108808	0.0838738	0.0895621	0.0987547	0.126923	0.0960006	0.062293	0.0899279	0.095838	0.0444617	0.020064	0.00253387	0.00589821	0.00788714	0.087815	0.0295356	0.0172865	0.00924653	0.0139769	0.0270151	0.0462777	0.0367681	0.0146993	0.0190365	0.0343733	0.0260709	0.00908827	0.0667291	0.0134074	0.0551036	0.0433349	0.0668664	0.0625496	0.0477469	0.0579311	0.05293	0.0666244	0.100209	0.071737	0.0673831	0.0612241	0.10492	0.161295	0.0427476	0.115764	0.0987894	0.106281	0.0462533
22.604	0.0865364	0.107341	0.0828768	0.0883696	0.0974033	0.125579	0.0947134	0.0612261	0.0883712	0.0944356	0.0435539	0.0195889	0.00244467	0.00572834	0.00766531	0.0866402	0.0290293	0.0168895	0.00897241	0.0136036	0.0263299	0.0452723	0.035959	0.0143242	0.0185156	0.0337143	0.0254894	0.0088283	0.0655092	0.0130569	0.0542393	0.0425258	0.0659235	0.0617133	0.046917	0.0569784	0.0519653	0.0656213	0.0988482	0.0704236	0.0663961	0.0605973	0.103646	0.16008	0.0419665	0.1147	0.0975514	0.105229	0.0453549
22.6338	0.0851433	0.105872	0.0818774	0.0871791	0.0960526	0.124229	0.0934287	0.0601666	0.086822	0.0930348	0.0426571	0.0191219	0.00235825	0.00556246	0.00744863	0.0854649	0.0285291	0.016499	0.00870491	0.0132384	0.0256567	0.0442791	0.0351614	0.0139568	0.0180056	0.0330629	0.0249172	0.00857482	0.0642993	0.0127138	0.0533792	0.0417254	0.0649793	0.0608799	0.0460949	0.0560342	0.0510098	0.0646248	0.0974886	0.0691216	0.0654146	0.059968	0.10237	0.158835	0.0411943	0.113628	0.0963119	0.104166	0.044467
22.6636	0.0837566	0.104402	0.080876	0.0859908	0.0947029	0.122873	0.0921468	0.0591149	0.085281	0.0916362	0.0417712	0.0186628	0.00227453	0.0054005	0.00723702	0.0842893	0.0280349	0.0161152	0.00844394	0.0128812	0.0249955	0.0432981	0.034375	0.0135969	0.0175064	0.0324191	0.0243542	0.00832774	0.0630999	0.0123778	0.0525237	0.0409339	0.0640343	0.0600495	0.0452807	0.055099	0.0500636	0.063635	0.0961308	0.0678311	0.0644389	0.0593366	0.101094	0.15756	0.0404309	0.112549	0.0950714	0.103095	0.0435899
22.6934	0.0823769	0.10293	0.0798728	0.0848051	0.0933547	0.121513	0.0908681	0.058071	0.0837487	0.0902404	0.0408963	0.0182118	0.00219345	0.0052424	0.00703038	0.0831139	0.0275468	0.0157379	0.00818938	0.0125319	0.0243462	0.0423295	0.0336001	0.0132446	0.0170179	0.0317829	0.0238004	0.00808692	0.061911	0.012049	0.0516729	0.0401514	0.0630891	0.0592222	0.0444747	0.0541729	0.0491268	0.0626523	0.094775	0.0665527	0.0634693	0.0587032	0.0998167	0.156257	0.0396764	0.111464	0.0938301	0.102014	0.0427235
22.7232	0.0810044	0.101459	0.0788683	0.0836222	0.0920083	0.120148	0.0895928	0.0570353	0.0822258	0.0888478	0.0400328	0.0177686	0.00211493	0.00508809	0.00682865	0.0819392	0.0270648	0.0153672	0.00794113	0.0121903	0.023709	0.0413735	0.0328366	0.0128996	0.01654	0.0311544	0.0232558	0.00785225	0.0607332	0.0117273	0.050827	0.039378	0.0621444	0.0583981	0.0436768	0.0532563	0.0481994	0.0616768	0.0934217	0.0652865	0.062506	0.0580683	0.0985398	0.154926	0.0389309	0.110372	0.0925887	0.100925	0.0418678
22.753	0.0796398	0.0999871	0.0778627	0.0824423	0.0906641	0.11878	0.0883213	0.0560078	0.0807129	0.087459	0.0391805	0.0173333	0.00203891	0.00493752	0.00663173	0.0807656	0.0265888	0.0150029	0.0076991	0.0118563	0.0230837	0.0404301	0.0320845	0.0125619	0.0160725	0.0305337	0.0227203	0.00762361	0.0595664	0.0114125	0.049986	0.0386137	0.0612007	0.0575773	0.0428872	0.0523493	0.0472816	0.0607087	0.0920711	0.064033	0.0615494	0.0574321	0.0972633	0.153569	0.0381942	0.109274	0.0913475	0.0998282	0.0410228
22.7828	0.0782835	0.0985164	0.0768564	0.0812659	0.0893226	0.11741	0.0870539	0.0549889	0.0792106	0.0860745	0.0383396	0.0169057	0.00196532	0.00479061	0.00643955	0.0795936	0.026119	0.0146451	0.00746317	0.0115299	0.0224703	0.0394996	0.031344	0.0122314	0.0156154	0.0299208	0.0221939	0.0074009	0.0584112	0.0111046	0.0491503	0.0378587	0.0602586	0.0567598	0.0421059	0.0514522	0.0463734	0.0597483	0.0907236	0.0627923	0.0605996	0.0567949	0.0959876	0.152185	0.0374665	0.10817	0.090107	0.0987239	0.0401886
22.8126	0.0769359	0.0970472	0.0758499	0.080093	0.0879842	0.116037	0.085791	0.0539787	0.0777195	0.0846948	0.0375103	0.016486	0.00189409	0.00464731	0.00625203	0.0784234	0.0256552	0.0142936	0.00723324	0.0112108	0.0218688	0.0385819	0.0306149	0.011908	0.0151685	0.0293156	0.0216767	0.00718398	0.0572676	0.0108035	0.0483199	0.037113	0.0593188	0.0559457	0.041333	0.0505653	0.0454749	0.0587957	0.0893797	0.0615648	0.0596569	0.056157	0.0947131	0.150777	0.0367477	0.10706	0.0888676	0.0976128	0.0393651
22.8425	0.0755974	0.0955801	0.0748434	0.078924	0.0866493	0.114663	0.0845328	0.0529774	0.0762401	0.0833203	0.0366925	0.0160739	0.00182517	0.00450755	0.00606908	0.0772556	0.0251976	0.0139485	0.00700921	0.010899	0.0212792	0.0376773	0.0298972	0.0115915	0.0147316	0.0287184	0.0211684	0.00697275	0.0561359	0.010509	0.047495	0.0363767	0.058382	0.0551352	0.0405686	0.0496886	0.0445862	0.0578512	0.0880396	0.0603508	0.0587216	0.0555187	0.0934402	0.149345	0.0360378	0.105945	0.0876297	0.0964954	0.0385525
22.8723	0.0742685	0.0941156	0.0738373	0.0777591	0.0853184	0.113288	0.0832797	0.0519851	0.0747729	0.0819517	0.0358864	0.0156695	0.00175849	0.00437128	0.00589061	0.0760906	0.024746	0.0136097	0.00679097	0.0105944	0.0207013	0.0367858	0.0291911	0.011282	0.0143047	0.0281289	0.0206692	0.00676709	0.0550164	0.0102212	0.0466757	0.0356498	0.0574487	0.0543283	0.0398128	0.0488225	0.0437073	0.0569149	0.0867038	0.0591504	0.0577938	0.0548803	0.0921694	0.147889	0.0353369	0.104826	0.0863938	0.095372	0.0377506
22.9021	0.0729496	0.0926542	0.072832	0.0765985	0.0839919	0.111913	0.082032	0.051002	0.0733185	0.0805893	0.035092	0.0152726	0.00169398	0.00423844	0.00571656	0.0749288	0.0243005	0.0132771	0.00657842	0.0102968	0.0201352	0.0359074	0.0284964	0.0109791	0.0138876	0.0275474	0.0201789	0.00656688	0.0539091	0.00993982	0.0458623	0.0349324	0.0565196	0.0535251	0.0390656	0.0479672	0.0428383	0.055987	0.0853726	0.0579639	0.0568736	0.0542422	0.0909009	0.146412	0.034645	0.103702	0.0851602	0.0942434	0.0369596
22.9319	0.071641	0.0911967	0.0718278	0.0754426	0.0826701	0.110538	0.08079	0.0500284	0.0718772	0.0792335	0.0343093	0.0148833	0.00163159	0.00410895	0.00554685	0.0737705	0.0238611	0.0129506	0.00637145	0.0100061	0.0195807	0.0350423	0.0278131	0.010683	0.0134802	0.0269737	0.0196975	0.00637202	0.0528144	0.00966486	0.0450549	0.0342246	0.0555953	0.0527258	0.038327	0.0471228	0.0419792	0.0550677	0.0840465	0.0567916	0.0559614	0.0536045	0.0896353	0.144914	0.0339619	0.102574	0.0839294	0.0931099	0.0361793
22.9617	0.0703432	0.0897434	0.0708252	0.0742915	0.0813537	0.109164	0.079554	0.0490644	0.0704497	0.077885	0.0335384	0.0145014	0.00157126	0.00398278	0.00538138	0.0726161	0.0234278	0.0126303	0.00616997	0.00972229	0.0190378	0.0341905	0.0271413	0.0103934	0.0130823	0.026408	0.019225	0.00618238	0.0517324	0.00939621	0.0442536	0.0335263	0.0546764	0.0519304	0.0375972	0.0462896	0.0411301	0.0541571	0.0827258	0.0556337	0.0550573	0.0529677	0.0883729	0.143396	0.0332878	0.101442	0.0827018	0.0919722	0.0354098
22.9915	0.0690566	0.088295	0.0698244	0.0731454	0.080043	0.107792	0.0783244	0.04811	0.0690363	0.0765441	0.0327793	0.014127	0.00151293	0.00385984	0.00522009	0.0714662	0.0230004	0.0123161	0.00597386	0.00944516	0.0185063	0.0333521	0.0264808	0.0101102	0.0126939	0.0258501	0.0187612	0.00599786	0.0506633	0.00913377	0.0434586	0.0328377	0.0537635	0.051139	0.0368761	0.0454676	0.0402911	0.0532555	0.0814109	0.0544902	0.0541614	0.0523321	0.0871141	0.141858	0.0326227	0.100306	0.0814777	0.0908309	0.0346511
23.0213	0.0677814	0.0868521	0.068826	0.0720046	0.0787384	0.106422	0.0771015	0.0471656	0.0676375	0.0752112	0.0320321	0.0137598	0.00145654	0.0037401	0.0050629	0.0703209	0.0225791	0.0120079	0.00578302	0.00917463	0.0179863	0.0325271	0.0258317	0.00983338	0.0123147	0.0253002	0.0183062	0.00581834	0.0496072	0.00887743	0.04267	0.0321587	0.0528571	0.0503518	0.0361638	0.0446572	0.0394621	0.0523631	0.0801022	0.0533614	0.0532739	0.051698	0.0858591	0.140303	0.0319664	0.0991674	0.0802575	0.0896863	0.0339032
23.0511	0.0665182	0.0854151	0.0678302	0.0708693	0.0774404	0.105054	0.0758856	0.0462312	0.0662536	0.0738867	0.0312967	0.0134	0.00140205	0.00362349	0.00490972	0.0691807	0.0221638	0.0117057	0.00559736	0.00891058	0.0174775	0.0317155	0.0251939	0.0095628	0.0119447	0.0247582	0.0178599	0.00564371	0.0485642	0.00862711	0.041888	0.0314893	0.0519579	0.0495688	0.0354604	0.0438584	0.0386433	0.0514798	0.0788001	0.0522475	0.0523949	0.0510658	0.0846085	0.138731	0.031319	0.098026	0.0790417	0.0885393	0.033166
23.0809	0.0652671	0.0839845	0.0668374	0.0697397	0.0761495	0.10369	0.0746769	0.0453069	0.064885	0.0725712	0.0305731	0.0130473	0.00134938	0.00350995	0.00476048	0.068046	0.0217545	0.0114093	0.00541676	0.0086529	0.0169799	0.0309173	0.0245674	0.00929836	0.0115836	0.0242241	0.0174221	0.00547387	0.0475345	0.00838271	0.0411127	0.0308297	0.0510663	0.0487902	0.0347658	0.0430715	0.0378347	0.0506061	0.0775051	0.0511485	0.0515245	0.0504357	0.0833625	0.137143	0.0306806	0.0968822	0.0778306	0.0873902	0.0324396
23.1107	0.0640286	0.0825609	0.0658481	0.0686161	0.074866	0.10233	0.0734759	0.0443929	0.0635322	0.071265	0.0298615	0.0127017	0.0012985	0.00339942	0.00461511	0.0669172	0.0213511	0.0111189	0.00524113	0.00840148	0.0164934	0.0301326	0.0239521	0.00903996	0.0112315	0.0236979	0.0169929	0.0053087	0.0465183	0.00814412	0.0403442	0.0301797	0.0501828	0.0480161	0.0340801	0.0422965	0.0370362	0.0497418	0.0762173	0.0500646	0.050663	0.0498081	0.0821214	0.13554	0.0300509	0.0957364	0.0766245	0.0862396	0.0317239
23.1405	0.0628029	0.0811448	0.0648626	0.0674986	0.0735904	0.100974	0.0722828	0.0434894	0.0621953	0.0699684	0.0291616	0.0123632	0.00124935	0.00329186	0.00447353	0.0657945	0.0209537	0.0108342	0.00507036	0.00815621	0.0160178	0.0293614	0.0233479	0.0087875	0.0108881	0.0231795	0.0165722	0.00514811	0.0455156	0.00791126	0.0395827	0.0295395	0.0493078	0.0472466	0.0334034	0.0415337	0.0362481	0.0488874	0.0749374	0.0489959	0.0498102	0.0491834	0.0808857	0.133924	0.0294302	0.0945889	0.0754238	0.0850883	0.031019
23.1703	0.0615903	0.0797366	0.0638812	0.0663875	0.0723232	0.0996226	0.071098	0.0425964	0.0608748	0.0686818	0.0284736	0.0120317	0.00120188	0.00318721	0.00433566	0.0646783	0.0205621	0.0105552	0.00490436	0.00791698	0.0155531	0.0286036	0.0227549	0.00854087	0.0105532	0.022669	0.0161598	0.00499197	0.0445265	0.00768403	0.0388283	0.0289089	0.0484417	0.0464819	0.0327356	0.0407832	0.0354702	0.0480428	0.0736656	0.0479425	0.0489665	0.0485619	0.0796556	0.132294	0.0288183	0.0934402	0.0742289	0.0839366	0.0303247
23.2001	0.0603912	0.0783369	0.0629045	0.065283	0.0710646	0.0982768	0.0699217	0.0417141	0.0595709	0.0674057	0.0277973	0.011707	0.00115604	0.00308541	0.00420143	0.0635689	0.0201763	0.0102819	0.00474303	0.00768369	0.015099	0.0278593	0.0221729	0.00829998	0.0102268	0.0221664	0.0157558	0.00484019	0.0435511	0.00746232	0.0380812	0.0282881	0.047585	0.045722	0.0320768	0.040045	0.0347026	0.0472082	0.0724023	0.0469045	0.0481317	0.0479439	0.0784315	0.130653	0.0282152	0.0922905	0.0730402	0.0827853	0.0296412
23.2299	0.0592058	0.076946	0.0619328	0.0641853	0.0698151	0.0969368	0.0687543	0.0408426	0.0582839	0.0661404	0.0271329	0.0113892	0.00111177	0.00298641	0.00407077	0.0624667	0.0197964	0.0100142	0.00458626	0.00745622	0.0146555	0.0271285	0.0216018	0.00806473	0.00990873	0.0216716	0.0153601	0.00469267	0.0425895	0.00724605	0.0373414	0.0276769	0.046738	0.0449671	0.0314269	0.0393194	0.0339454	0.0463838	0.0711478	0.0458818	0.0473061	0.0473298	0.0772137	0.129001	0.0276208	0.0911404	0.0718578	0.0816349	0.0289683
23.2597	0.0580343	0.0755645	0.0609664	0.0630947	0.0685752	0.0956031	0.067596	0.039982	0.0570141	0.0648862	0.0264801	0.0110782	0.00106905	0.00289015	0.0039436	0.061372	0.0194222	0.00975211	0.00443395	0.00723448	0.0142225	0.026411	0.0210417	0.00783503	0.00959879	0.0211846	0.0149725	0.00454929	0.0416417	0.00703511	0.0366091	0.0270755	0.0459009	0.0442174	0.030786	0.0386065	0.0331986	0.0455697	0.0699026	0.0448746	0.0464896	0.0467199	0.0760024	0.127339	0.0270353	0.0899901	0.0706823	0.080486	0.028306
23.2895	0.056877	0.0741928	0.0600058	0.0620112	0.0673451	0.0942763	0.0664472	0.0391323	0.0557616	0.0636435	0.025839	0.0107738	0.00102781	0.00279659	0.00381986	0.0602851	0.0190537	0.00949546	0.00428602	0.00701835	0.0137997	0.0257069	0.0204923	0.00761077	0.00929689	0.0207053	0.014593	0.00440996	0.0407078	0.00682941	0.0358844	0.0264837	0.045074	0.043473	0.0301542	0.0379063	0.0324622	0.0447661	0.068667	0.0438829	0.0456824	0.0461145	0.0747979	0.125668	0.0264584	0.0888401	0.0695138	0.0793392	0.0276544
23.3193	0.0557341	0.0728312	0.0590513	0.0609352	0.0661253	0.0929566	0.0653081	0.0382937	0.0545268	0.0624125	0.0252095	0.010476	0.000988012	0.00270567	0.00369947	0.0592063	0.0186909	0.00924423	0.00414236	0.00680773	0.0133871	0.0250161	0.0199537	0.00739186	0.00900286	0.0202338	0.0142216	0.00427457	0.0397879	0.00662886	0.0351675	0.0259015	0.0442575	0.0427339	0.0295313	0.037219	0.0317362	0.043973	0.0674412	0.0429067	0.0448844	0.045514	0.0736006	0.12399	0.0258903	0.0876908	0.0683528	0.0781951	0.0270133
23.3491	0.0546058	0.0714803	0.0581034	0.0598668	0.0649162	0.0916445	0.0641792	0.0374663	0.0533097	0.0611936	0.0245916	0.0101847	0.000949614	0.00261734	0.00358236	0.0581359	0.0183338	0.00899836	0.00400289	0.00660253	0.0129845	0.0243386	0.0194257	0.00717822	0.00871657	0.01977	0.0138581	0.00414303	0.038882	0.00643335	0.0344583	0.025329	0.0434516	0.0420005	0.0289174	0.0365448	0.0310207	0.0431907	0.0662257	0.041946	0.0440957	0.0449187	0.0724108	0.122305	0.0253309	0.0865426	0.0671995	0.0770543	0.0263828
23.3789	0.0534923	0.0701404	0.0571625	0.0588063	0.0637179	0.0903406	0.0630605	0.0366502	0.0521106	0.0599871	0.0239851	0.0098999	0.000912572	0.00253156	0.00346846	0.0570741	0.0179822	0.00875779	0.00386749	0.00640263	0.0125918	0.0236743	0.0189083	0.00696974	0.00843788	0.0193139	0.0135025	0.00401524	0.0379901	0.00624279	0.0337572	0.0247661	0.0426565	0.0412727	0.0283125	0.0358836	0.0303156	0.0424192	0.0650208	0.0410007	0.0433163	0.0443289	0.0712286	0.120614	0.0247801	0.0853959	0.0660542	0.0759175	0.0257628
23.4087	0.0523938	0.068812	0.056229	0.0577538	0.062531	0.0890451	0.0619526	0.0358453	0.0509296	0.0587932	0.0233901	0.00962141	0.000876844	0.00244826	0.0033577	0.0560212	0.0176362	0.00852244	0.00373609	0.00620794	0.0122088	0.0230231	0.0184013	0.00676634	0.00816666	0.0188654	0.0131547	0.00389109	0.0371122	0.0060571	0.0330641	0.0242127	0.0418722	0.0405508	0.0277167	0.0352356	0.029621	0.0416586	0.0638267	0.0400709	0.0425463	0.0437449	0.0700543	0.118919	0.024238	0.0842511	0.0649172	0.0747852	0.0251532
23.4385	0.0513103	0.0674953	0.0553031	0.0567097	0.0613557	0.0877584	0.0608555	0.0350519	0.0497668	0.0576122	0.0228064	0.00934918	0.00084239	0.00236741	0.00325003	0.0549775	0.0172957	0.00829225	0.00360858	0.00601836	0.0118353	0.022385	0.0179048	0.00656792	0.00790275	0.0184245	0.0128146	0.0037705	0.0362483	0.00587616	0.0323791	0.0236688	0.0410988	0.0398349	0.0271297	0.0346008	0.0289369	0.0409092	0.0626437	0.0391564	0.0417856	0.043167	0.0688882	0.117219	0.0237044	0.0831085	0.0637888	0.0736581	0.0245541
23.4683	0.0502422	0.0661908	0.0543855	0.0556739	0.0601923	0.086481	0.0597697	0.03427	0.0486224	0.0564445	0.022234	0.00908314	0.000809168	0.00228895	0.00314536	0.0539432	0.0169606	0.00806716	0.00348489	0.0058338	0.0114712	0.0217599	0.0174185	0.00637439	0.00764603	0.0179911	0.0124821	0.00365336	0.0353985	0.00569989	0.0317024	0.0231344	0.0403363	0.0391251	0.0265518	0.0339794	0.0282634	0.0401709	0.0614722	0.0382574	0.0410343	0.0425954	0.0677306	0.115517	0.0231794	0.0819687	0.0626692	0.0725367	0.0239653
23.4981	0.0491894	0.0648988	0.0534763	0.0546469	0.0590411	0.0852132	0.0586953	0.0334995	0.0474964	0.0552901	0.0216728	0.00882321	0.000777142	0.00221283	0.00304364	0.0529186	0.0166308	0.00784709	0.00336491	0.00565414	0.0111163	0.0211476	0.0169424	0.00618568	0.00739635	0.0175653	0.0121572	0.00353958	0.0345626	0.0055282	0.0310341	0.0226095	0.0395848	0.0384216	0.0259828	0.0333714	0.0276003	0.039444	0.0603124	0.0373736	0.0402923	0.0420303	0.0665816	0.113813	0.0226629	0.080832	0.0615588	0.0714217	0.0233869
23.5279	0.048152	0.0636196	0.0525761	0.0536287	0.0579024	0.0839553	0.0576327	0.0327407	0.046389	0.0541495	0.0211226	0.00856928	0.000746272	0.00213901	0.00294479	0.0519039	0.0163064	0.00763198	0.00324856	0.0054793	0.0107706	0.0205482	0.0164764	0.00600168	0.00715358	0.0171469	0.0118398	0.00342907	0.0337408	0.005361	0.0303742	0.0220939	0.0388442	0.0377245	0.0254227	0.0327768	0.0269478	0.0387286	0.0591646	0.0365049	0.0395597	0.0414721	0.0654415	0.112108	0.0221549	0.0796988	0.0604578	0.0703137	0.0228188
23.5577	0.0471302	0.0623537	0.0516851	0.0526195	0.0567765	0.0827076	0.0565821	0.0319936	0.0453002	0.0530226	0.0205835	0.00832129	0.000716522	0.00206744	0.00284877	0.0508994	0.0159873	0.00742176	0.00313575	0.00530917	0.0104338	0.0199615	0.0160204	0.00582232	0.00691758	0.0167359	0.0115297	0.00332174	0.0329329	0.00519819	0.0297228	0.0215877	0.0381145	0.037034	0.0248715	0.0321957	0.0263058	0.0380247	0.0580289	0.0356514	0.0388364	0.0409209	0.0643105	0.110402	0.0216553	0.0785695	0.0593664	0.0692133	0.0222609
23.5875	0.046124	0.0611013	0.0508038	0.0516196	0.0556636	0.0814705	0.0555437	0.0312582	0.04423	0.0519099	0.0200552	0.00807915	0.000687857	0.00199807	0.00275549	0.0499051	0.0156734	0.00721636	0.0030264	0.00514368	0.0101057	0.0193874	0.0155742	0.0056475	0.00668823	0.0163323	0.0112269	0.00321751	0.0321389	0.00503968	0.02908	0.0210907	0.0373957	0.0363503	0.0243292	0.031628	0.0256743	0.0373324	0.0569057	0.0348129	0.0381224	0.0403768	0.0631887	0.108698	0.0211641	0.0774446	0.0582849	0.0681211	0.0217132
23.6174	0.0451334	0.0598628	0.0499326	0.0506291	0.0545639	0.0802443	0.0545178	0.0305346	0.0431785	0.0508114	0.0195378	0.00784276	0.00066024	0.00193086	0.00266491	0.0489213	0.0153646	0.00701572	0.00292042	0.00498271	0.00978622	0.0188258	0.0151379	0.00547715	0.00646538	0.0159359	0.0109314	0.00311627	0.0313588	0.00488539	0.0284459	0.0206029	0.0366877	0.0356734	0.0237957	0.0310739	0.0250534	0.0366519	0.0557951	0.0339893	0.0374176	0.03984	0.0620765	0.106995	0.0206812	0.0763244	0.0572135	0.0670378	0.0211756
23.6472	0.0441584	0.0586384	0.0490716	0.0496483	0.0534777	0.0790291	0.0535046	0.0298228	0.0421457	0.0497274	0.019031	0.00761205	0.000633639	0.00186575	0.00257695	0.0479483	0.015061	0.00681976	0.00281772	0.00482619	0.0094752	0.0182766	0.0147112	0.00531117	0.00624891	0.0155469	0.0106429	0.00301795	0.0305925	0.00473521	0.0278205	0.0201244	0.0359904	0.0350035	0.0232711	0.0305332	0.024443	0.0359833	0.0546973	0.0331805	0.0367222	0.0393107	0.0609739	0.105294	0.0202067	0.0752094	0.0561524	0.0659638	0.0206481
23.677	0.043199	0.0574285	0.0482214	0.0486772	0.0524051	0.0778254	0.0525044	0.0291229	0.0411316	0.0486579	0.0185348	0.00738693	0.000608019	0.0018027	0.00249157	0.0469861	0.0147624	0.00662842	0.00271823	0.00467401	0.00917247	0.0177397	0.0142942	0.0051495	0.00603869	0.015165	0.0103615	0.00292247	0.0298399	0.00458908	0.0272039	0.0196549	0.0353038	0.0343408	0.0227552	0.030006	0.023843	0.0353265	0.0536126	0.0323863	0.0360359	0.0387888	0.0598812	0.103597	0.0197404	0.0740998	0.0551018	0.0648998	0.0201306
23.7068	0.0422552	0.0562334	0.0473821	0.0477162	0.0513464	0.0766333	0.0515172	0.0284349	0.0401361	0.0476032	0.0180491	0.0071673	0.000583349	0.00174167	0.00240869	0.0460349	0.0144687	0.00644161	0.00262185	0.00452608	0.00887786	0.0172149	0.0138865	0.00499204	0.00583459	0.0147903	0.010087	0.00282973	0.029101	0.00444689	0.0265963	0.0191944	0.0346277	0.0336853	0.0222481	0.0294921	0.0232536	0.0346817	0.052541	0.0316066	0.0353588	0.0382745	0.0587985	0.101904	0.0192824	0.0729962	0.054062	0.0638463	0.019623
23.7366	0.041327	0.0550534	0.0465542	0.0467653	0.0503017	0.075453	0.0505433	0.027759	0.0391593	0.0465634	0.0175737	0.00695308	0.000559598	0.0016826	0.00232827	0.0450949	0.01418	0.00625928	0.00252852	0.00438233	0.00859122	0.0167021	0.0134883	0.00483871	0.0056365	0.0144226	0.0098193	0.00273967	0.0283758	0.00430857	0.0259975	0.0187429	0.0339621	0.0330373	0.0217497	0.0289916	0.0226747	0.0340489	0.0514828	0.0308413	0.0346908	0.0377678	0.0577259	0.100215	0.0188325	0.071899	0.0530332	0.062804	0.0191253
23.7664	0.0404142	0.0538887	0.0457377	0.0458246	0.0492711	0.0742847	0.0495829	0.0270952	0.0382011	0.0455385	0.0171086	0.00674419	0.000536735	0.00162545	0.00225024	0.0441662	0.0138961	0.00608135	0.00243815	0.00424264	0.0083124	0.0162012	0.0130993	0.00468943	0.00544428	0.014062	0.00955833	0.00265221	0.027664	0.00417403	0.0254077	0.0183002	0.033307	0.0323968	0.0212599	0.0285043	0.0221062	0.0334282	0.0504381	0.0300902	0.0340318	0.0372686	0.0566637	0.0985326	0.0183906	0.0708084	0.0520154	0.0617733	0.0186374
23.7962	0.0395168	0.0527397	0.044933	0.0448945	0.0482549	0.0731287	0.048636	0.0264436	0.0372613	0.0445288	0.0166536	0.00654053	0.00051473	0.00157017	0.00217454	0.0432489	0.0136171	0.00590776	0.00235066	0.00410695	0.00804122	0.015712	0.0127195	0.00454413	0.00525781	0.0137083	0.00930397	0.00256726	0.0269657	0.00404318	0.0248269	0.0178664	0.0326621	0.0317641	0.0207788	0.0280301	0.0215481	0.0328195	0.049407	0.0293532	0.0333819	0.036777	0.0556119	0.0968564	0.0179569	0.0697248	0.051009	0.0607548	0.0181592
23.826	0.0386347	0.0516067	0.0441403	0.043975	0.0472531	0.071985	0.0477029	0.0258042	0.03634	0.0435342	0.0162086	0.00634202	0.000493554	0.00151671	0.00210113	0.0423432	0.0133428	0.00573842	0.00226598	0.00397516	0.00777753	0.0152345	0.0123488	0.00440272	0.005077	0.0133615	0.00905609	0.00248477	0.0262806	0.00391594	0.0242552	0.0174413	0.0320274	0.0311391	0.0203062	0.0275688	0.0210005	0.0322229	0.0483896	0.0286301	0.0327408	0.0362928	0.0545708	0.0951873	0.0175311	0.0686487	0.050014	0.059749	0.0176906
23.8558	0.0377677	0.0504899	0.0433597	0.0430662	0.0462658	0.0708538	0.0467836	0.0251771	0.035437	0.042555	0.0157735	0.00614857	0.000473181	0.00146503	0.00202994	0.0414491	0.0130731	0.00557326	0.00218403	0.00384718	0.00752118	0.0147684	0.0119871	0.00426513	0.00490171	0.0130216	0.00881459	0.00240465	0.0256088	0.00379223	0.0236926	0.0170248	0.0314029	0.030522	0.0198421	0.0271202	0.0204632	0.0316382	0.047386	0.0279206	0.0321087	0.0358159	0.0535404	0.0935261	0.0171133	0.0675803	0.0490307	0.0587565	0.0172316
23.8856	0.0369158	0.0493898	0.0425913	0.0421684	0.0452931	0.0697352	0.0458781	0.0245625	0.0345522	0.041591	0.0153482	0.00596009	0.000453581	0.00141507	0.00196092	0.0405667	0.0128081	0.00541223	0.00210474	0.00372293	0.00727201	0.0143136	0.0116342	0.00413127	0.00473184	0.0126884	0.00857934	0.00232684	0.0249501	0.00367197	0.023139	0.0166169	0.0307884	0.029913	0.0193864	0.0266841	0.0199362	0.0310655	0.0463964	0.0272248	0.0314853	0.0353463	0.0525208	0.0918735	0.0167033	0.0665201	0.0480591	0.0577776	0.0167821
23.9154	0.0360786	0.0483065	0.0418353	0.0412816	0.0443352	0.0686293	0.0449866	0.0239605	0.0336855	0.0406424	0.0149325	0.0057765	0.00043473	0.00136679	0.00189402	0.039696	0.0125476	0.00525523	0.00202803	0.00360232	0.00702987	0.01387	0.0112901	0.00400108	0.00456729	0.0123619	0.00835021	0.00225127	0.0243044	0.00355508	0.0225946	0.0162175	0.0301839	0.0293122	0.0189392	0.0262603	0.0194195	0.0305046	0.0454207	0.0265423	0.0308706	0.0348837	0.0515121	0.0902301	0.0163012	0.0654684	0.0470995	0.0568128	0.016342
23.9452	0.0352562	0.0472405	0.0410916	0.0404061	0.043392	0.0675362	0.0441091	0.0233711	0.0328367	0.0397093	0.0145262	0.0055977	0.000416601	0.00132014	0.00182919	0.0388372	0.0122916	0.00510221	0.00195384	0.00348527	0.0067946	0.0134374	0.0109547	0.00387446	0.00440794	0.012042	0.00812707	0.00217789	0.0236716	0.00344149	0.0220594	0.0158265	0.0295893	0.0287196	0.0185003	0.0258484	0.0189131	0.0299555	0.0444591	0.0258731	0.0302646	0.0344281	0.0505146	0.0885966	0.0159068	0.0644254	0.0461519	0.0558626	0.0159112
23.975	0.0344482	0.046192	0.0403603	0.0395418	0.0424635	0.0664559	0.0432455	0.0227945	0.0320057	0.0387915	0.0141293	0.0054236	0.000399169	0.00127506	0.00176637	0.0379902	0.0120401	0.00495308	0.00188208	0.0033717	0.00656606	0.0130156	0.0106279	0.00375136	0.00425371	0.0117287	0.00790979	0.00210662	0.0230515	0.00333111	0.0215332	0.0154438	0.0290045	0.0281353	0.0180696	0.0254481	0.0184168	0.0294179	0.0435116	0.0252169	0.0296671	0.0339791	0.0495281	0.0869737	0.0155201	0.0633915	0.0452164	0.0549273	0.0154895
24.0048	0.0336546	0.0451614	0.0396413	0.0386889	0.0415499	0.0653884	0.0423958	0.0222308	0.0311922	0.0378892	0.0137417	0.00525413	0.000382411	0.00123151	0.00170551	0.0371552	0.0117929	0.00480778	0.00181271	0.00326152	0.00634409	0.0126045	0.0103096	0.00363168	0.00410448	0.0114219	0.00769821	0.00203742	0.022444	0.00322387	0.0210163	0.0150694	0.0284296	0.0275595	0.0176472	0.0250591	0.0179306	0.0288918	0.0425782	0.0245735	0.029078	0.0335366	0.0485529	0.0853619	0.0151409	0.0623671	0.0442932	0.0540075	0.015077
24.0346	0.0328751	0.044149	0.0389346	0.0378475	0.0406511	0.0643338	0.0415601	0.0216802	0.0303961	0.0370024	0.0133631	0.00508918	0.000366302	0.00118944	0.00164656	0.036332	0.01155	0.00466624	0.00174564	0.00315465	0.00612854	0.012204	0.00999973	0.00351537	0.00396017	0.0111215	0.00749221	0.00197022	0.021849	0.00311969	0.0205084	0.014703	0.0278643	0.0269923	0.0172329	0.0246809	0.0174546	0.0283769	0.0416589	0.0239428	0.0284972	0.0331004	0.0475891	0.0837619	0.0147693	0.0613523	0.0433823	0.0531034	0.0146735
24.0644	0.0321095	0.0431552	0.03824	0.0370178	0.0397671	0.063292	0.0407381	0.0211429	0.0296172	0.0361309	0.0129934	0.00492869	0.000350821	0.0011488	0.00158948	0.0355208	0.0113114	0.00452838	0.00168081	0.00305101	0.00591927	0.0118139	0.0096982	0.00340233	0.00382068	0.0108274	0.00729162	0.00190496	0.0212662	0.0030185	0.0200097	0.0143447	0.0273087	0.0264337	0.0168267	0.0243131	0.0169885	0.0278729	0.0407537	0.0233246	0.0279247	0.0326702	0.0466366	0.0821742	0.0144052	0.0603476	0.0424839	0.0522153	0.0142789
24.0942	0.0313576	0.0421803	0.0375573	0.0361997	0.0388979	0.062263	0.0399299	0.0206189	0.0288552	0.0352748	0.0126325	0.00477254	0.000335944	0.00110954	0.00153421	0.0347214	0.0110769	0.00439413	0.00161815	0.00295053	0.00571614	0.0114339	0.00940493	0.00329251	0.00368592	0.0105396	0.0070963	0.0018416	0.0206957	0.00292024	0.0195201	0.0139943	0.0267626	0.0258838	0.0164285	0.0239553	0.0165323	0.0273797	0.0398627	0.0227187	0.0273604	0.0322457	0.0456955	0.0805994	0.0140485	0.059353	0.041598	0.0513437	0.0138932
24.124	0.0306192	0.0412246	0.0368864	0.0353934	0.0380435	0.0612467	0.0391352	0.0201085	0.0281099	0.0344341	0.0122803	0.00462067	0.000321651	0.00107161	0.00148071	0.033934	0.0108466	0.00426342	0.00155761	0.00285311	0.005519	0.011064	0.00911982	0.00318582	0.0035558	0.010258	0.0069061	0.00178009	0.0201372	0.00282482	0.0190396	0.0136518	0.0262262	0.0253426	0.0160382	0.023607	0.016086	0.026897	0.0389859	0.022125	0.026804	0.0318268	0.044766	0.0790381	0.0136991	0.058369	0.0407247	0.0504888	0.0135161
24.1538	0.0298941	0.0402885	0.0362271	0.034599	0.0372037	0.0602431	0.038354	0.0196118	0.027381	0.0336086	0.0119365	0.00447298	0.000307922	0.00103497	0.00142892	0.0331583	0.0106203	0.00413617	0.00149912	0.0027587	0.00532771	0.0107039	0.00884277	0.0030822	0.00343021	0.0099825	0.00672086	0.00172037	0.0195905	0.00273218	0.0185681	0.013317	0.0256992	0.0248103	0.0156558	0.0232677	0.0156495	0.0264244	0.0381231	0.0215432	0.0262556	0.0314132	0.043848	0.0774907	0.0133569	0.0573957	0.039864	0.0496508	0.0131476
24.1836	0.0291822	0.039372	0.035579	0.0338165	0.0363786	0.059252	0.0375861	0.0191288	0.0266683	0.0327983	0.011601	0.00432939	0.000294734	0.000999559	0.00137881	0.0323945	0.010398	0.00401232	0.00144261	0.0026672	0.00514213	0.0103536	0.0085737	0.00298156	0.00330908	0.00971304	0.00654043	0.00166239	0.0190555	0.00264225	0.0181056	0.0129899	0.0251816	0.0242868	0.0152812	0.0229369	0.0152227	0.0259617	0.0372744	0.0209732	0.025715	0.0310046	0.0429416	0.0759578	0.0130218	0.0564334	0.0390159	0.04883	0.0127875
24.2134	0.0284832	0.0384755	0.034942	0.033046	0.0355681	0.0582735	0.0368312	0.0186596	0.0259715	0.0320032	0.0112738	0.00418982	0.000282071	0.000965339	0.00133033	0.0316425	0.0101796	0.0038918	0.00138803	0.00257854	0.00496213	0.0100127	0.00831249	0.00288385	0.00319229	0.00944954	0.00636466	0.00160612	0.0185321	0.00255496	0.0176522	0.0126703	0.0246735	0.0237723	0.0149142	0.022614	0.0148055	0.0255086	0.0364397	0.0204148	0.025182	0.0306009	0.0420469	0.0744398	0.0126939	0.0554823	0.0381806	0.0480265	0.0124359
24.2432	0.0277969	0.0375991	0.0343157	0.0322875	0.034772	0.0573073	0.0360893	0.0182043	0.0252903	0.0312231	0.0109545	0.00405416	0.000269912	0.000932264	0.00128343	0.0309021	0.00996507	0.00377454	0.00133533	0.00249265	0.00478758	0.00968123	0.00805903	0.00278899	0.00307975	0.00919191	0.0061934	0.0015515	0.0180201	0.00247025	0.0172076	0.0123581	0.0241746	0.0232668	0.0145549	0.0222985	0.0143977	0.0250647	0.035619	0.0198679	0.0246566	0.0302016	0.0411638	0.0729372	0.0123729	0.0545425	0.037358	0.0472403	0.0120925
24.273	0.0271232	0.0367426	0.0336999	0.031541	0.0339904	0.0563534	0.0353601	0.0177628	0.0246245	0.0304579	0.0106431	0.00392236	0.000258239	0.000900291	0.00123807	0.0301734	0.00975436	0.00366046	0.00128443	0.00240945	0.00461833	0.00935892	0.00781318	0.00269691	0.00297135	0.00894008	0.0060265	0.00149849	0.0175193	0.00238805	0.0167719	0.0120533	0.023685	0.0227703	0.0142031	0.0219899	0.0139994	0.0246297	0.0348121	0.0193322	0.0241387	0.0298067	0.0402925	0.0714505	0.0120588	0.0536142	0.0365481	0.0464715	0.0117571
24.3028	0.0264619	0.0359061	0.0330942	0.0308066	0.0332229	0.0554116	0.0346434	0.017335	0.0239736	0.0297075	0.0103394	0.00379431	0.000247034	0.000869378	0.0011942	0.0294562	0.0095474	0.0035495	0.0012353	0.00232887	0.00445426	0.00904561	0.00757479	0.00260755	0.00286697	0.00869396	0.00586382	0.00144706	0.0170295	0.00230829	0.016345	0.0117557	0.0232046	0.0222828	0.0138587	0.0216877	0.0136104	0.0242033	0.0340191	0.0188076	0.0236281	0.0294159	0.0394328	0.06998	0.0117515	0.0526977	0.035751	0.0457199	0.0114298
24.3326	0.0258128	0.0350893	0.0324983	0.0300842	0.0324697	0.0544818	0.0339389	0.0169207	0.0233374	0.0289718	0.0100432	0.00366993	0.000236281	0.000839483	0.00115179	0.0287506	0.00934412	0.00344158	0.00118786	0.00225084	0.00429525	0.00874114	0.0073437	0.00252083	0.00276649	0.00845349	0.00570521	0.00139715	0.0165506	0.00223093	0.0159268	0.0114652	0.0227334	0.0218043	0.0135217	0.0213914	0.0132306	0.0237851	0.0332399	0.0182939	0.0231247	0.029029	0.0385849	0.0685262	0.011451	0.051793	0.0349666	0.0449854	0.0111104
24.3624	0.0251758	0.0342917	0.0319119	0.029374	0.0317305	0.0535639	0.0332465	0.0165195	0.0227156	0.0282506	0.00975434	0.00354915	0.000225963	0.000810569	0.00111079	0.0280563	0.00914446	0.00333665	0.00114208	0.00217528	0.00414117	0.00844531	0.00711972	0.0024367	0.00266977	0.00821857	0.00555055	0.00134874	0.0160824	0.00215588	0.0155173	0.0111816	0.0222712	0.0213349	0.0131919	0.0211004	0.0128598	0.0233749	0.0324742	0.017791	0.0226285	0.0286457	0.0377487	0.0670894	0.011157	0.0509002	0.0341949	0.0442675	0.0107987
24.3923	0.0245506	0.033513	0.0313348	0.0286758	0.0310051	0.0526577	0.0325659	0.0161311	0.0221079	0.0275439	0.00947272	0.00343188	0.000216063	0.000782598	0.00107115	0.0273733	0.00894837	0.00323462	0.0010979	0.00210213	0.00399189	0.00815796	0.00690266	0.00235508	0.00257668	0.00798912	0.0053997	0.00130177	0.0156248	0.0020831	0.0151164	0.010905	0.021818	0.0208745	0.0128693	0.0208142	0.012498	0.0229723	0.0317222	0.0172987	0.0221392	0.028266	0.0369243	0.06567	0.0108696	0.0500194	0.0334359	0.0435657	0.0104946
24.4221	0.0239373	0.0327523	0.0307666	0.0279896	0.0302936	0.0517632	0.0318968	0.0157551	0.021514	0.0268513	0.00919813	0.00331804	0.000206567	0.000755535	0.00103285	0.0267016	0.00875578	0.00313545	0.00105526	0.00203132	0.00384729	0.00787891	0.0066923	0.00227591	0.00248707	0.00776506	0.00525253	0.00125623	0.0151775	0.00201253	0.014724	0.010635	0.0213737	0.0204232	0.0125537	0.0205325	0.0121451	0.0225769	0.0309836	0.0168168	0.0216568	0.0278896	0.0361116	0.0642683	0.0105887	0.0491508	0.0326895	0.0428796	0.010198
24.4519	0.0233356	0.0320091	0.0302071	0.0273155	0.0295956	0.0508802	0.0312391	0.0153909	0.0209336	0.0261729	0.00893043	0.00320755	0.000197459	0.000729346	0.000995837	0.026041	0.00856663	0.00303905	0.00101412	0.00196278	0.00370727	0.00760799	0.00648841	0.00219912	0.00240079	0.00754631	0.00510893	0.00121206	0.0147405	0.0019441	0.01434	0.0103717	0.0209382	0.0199808	0.012245	0.0202547	0.0118008	0.0221886	0.0302583	0.0163452	0.0211812	0.0275164	0.0353106	0.0628846	0.010314	0.0482943	0.0319556	0.0422084	0.00990879
24.4817	0.0227453	0.0312823	0.029656	0.0266534	0.028911	0.0500086	0.0305925	0.0150379	0.0203663	0.0255084	0.00866946	0.00310033	0.000188724	0.000703999	0.000960076	0.0253915	0.00838087	0.00294536	0.00097444	0.00189644	0.00357169	0.00734503	0.00629075	0.00212466	0.0023177	0.00733279	0.00496878	0.00116924	0.0143134	0.00187776	0.0139644	0.0101149	0.0205114	0.0195474	0.0119432	0.0199804	0.0114651	0.0218069	0.0295462	0.0158837	0.0207123	0.0271462	0.0345214	0.0615193	0.0100456	0.04745	0.0312342	0.0415512	0.00962676
24.5115	0.0221665	0.0305711	0.0291131	0.0260032	0.0282397	0.0491482	0.0299568	0.0146954	0.0198119	0.0248575	0.00841506	0.0029963	0.00018035	0.000679464	0.000925528	0.024753	0.00819844	0.00285433	0.000936162	0.00183225	0.00344045	0.00708983	0.00609907	0.00205247	0.00223763	0.00712441	0.00483197	0.00112772	0.0138963	0.00181346	0.0135969	0.00986449	0.0200931	0.019123	0.0116482	0.0197092	0.0111379	0.0214317	0.0288473	0.0154322	0.02025	0.0267789	0.0337438	0.0601725	0.00978339	0.0466178	0.0305253	0.0409073	0.00935182
24.5413	0.0215988	0.0298745	0.028578	0.0253649	0.0275815	0.0482991	0.0293317	0.0143628	0.0192701	0.0242202	0.00816708	0.00289539	0.000172321	0.000655713	0.000892156	0.0241253	0.00801928	0.00276588	0.000899244	0.00177012	0.00331344	0.00684225	0.00591314	0.00198248	0.00216044	0.00692109	0.0046984	0.00108748	0.0134888	0.00175114	0.0132376	0.00962026	0.0196834	0.0187074	0.0113597	0.0194408	0.0108189	0.0210627	0.0281613	0.0149906	0.0197942	0.0264144	0.0329779	0.0588445	0.00952717	0.0457978	0.0298287	0.0402756	0.00908381
24.5711	0.0210423	0.0291915	0.0280507	0.0247385	0.0269362	0.047461	0.028717	0.0140393	0.0187406	0.0235963	0.00792538	0.00279751	0.000164626	0.000632717	0.000859924	0.0235084	0.00784334	0.00267994	0.000863643	0.00171001	0.00319054	0.0066021	0.00573272	0.00191463	0.00208598	0.00672276	0.00456797	0.00104849	0.0130909	0.00169074	0.0128863	0.00938212	0.0192819	0.0183005	0.0110777	0.0191748	0.010508	0.0206995	0.0274881	0.0145586	0.0193448	0.0260526	0.0322237	0.0575356	0.00927688	0.0449899	0.0291443	0.0396552	0.00882262
24.6009	0.0204968	0.0285212	0.0275307	0.0241237	0.0263037	0.046634	0.0281125	0.0137244	0.0182231	0.0229854	0.00768982	0.00270259	0.00015725	0.000610452	0.000828795	0.0229021	0.00767054	0.00259647	0.000829317	0.00165184	0.00307166	0.00636921	0.00555755	0.00184887	0.0020141	0.00652931	0.00444059	0.0010107	0.0127023	0.00163222	0.012543	0.00914991	0.0188887	0.0179024	0.0108021	0.0189109	0.0102051	0.020342	0.0268276	0.0141362	0.0189018	0.0256933	0.0314811	0.0562459	0.00903241	0.044194	0.0284721	0.0390453	0.00856809
24.6307	0.0199622	0.0278626	0.027018	0.0235206	0.0256837	0.0458179	0.0275179	0.0134172	0.0177174	0.0223874	0.00746025	0.00261056	0.000150183	0.000588894	0.000798736	0.0223065	0.00750084	0.00251539	0.000796224	0.00159557	0.00295669	0.00614341	0.00538743	0.00178514	0.00194468	0.00634068	0.00431618	0.000974099	0.0123229	0.00157553	0.0122074	0.00892349	0.0185034	0.0175129	0.0105327	0.0186488	0.00991007	0.0199899	0.0261796	0.0137232	0.018465	0.0253366	0.03075	0.0549756	0.00879365	0.04341	0.0278118	0.0384448	0.0083201
24.6605	0.0194384	0.0272149	0.0265124	0.0229291	0.025076	0.0450127	0.0269331	0.0131174	0.0172232	0.0218021	0.00723653	0.00252134	0.000143413	0.000568018	0.000769712	0.0217214	0.00733418	0.00243664	0.000764325	0.00154112	0.00284553	0.00592455	0.00522214	0.00172339	0.00187759	0.00615679	0.00419465	0.000938643	0.0119526	0.00152061	0.0118796	0.00870272	0.0181261	0.017132	0.0102694	0.0183883	0.00962267	0.0196431	0.025544	0.0133194	0.0180344	0.0249823	0.0300305	0.0537248	0.00856049	0.0426377	0.0271634	0.0378529	0.0080785
24.6903	0.0189253	0.0265772	0.0260137	0.0223489	0.0244805	0.0442183	0.0263577	0.0128241	0.0167402	0.0212293	0.00701854	0.00243486	0.000136927	0.000547803	0.000741689	0.0211468	0.0071705	0.00236016	0.00073358	0.00148845	0.00273808	0.00571245	0.00506147	0.00166355	0.00181272	0.00597754	0.00407592	0.000904305	0.0115912	0.00146741	0.0115593	0.00848743	0.0177564	0.0167594	0.010012	0.0181291	0.00934276	0.0193011	0.0249206	0.0129248	0.01761	0.0246304	0.0293225	0.0524936	0.00833283	0.0418769	0.0265267	0.0372688	0.00784314
24.7201	0.0184227	0.025949	0.0255216	0.0217802	0.0238969	0.0434347	0.0257917	0.0125371	0.0162683	0.0206687	0.00680615	0.00235104	0.000130715	0.000528229	0.000714635	0.0205825	0.00700974	0.0022859	0.000703952	0.00143749	0.00263425	0.00550695	0.00490524	0.00160559	0.00174995	0.00580286	0.00395993	0.000871057	0.0112385	0.00141589	0.0112464	0.00827747	0.0173942	0.0163951	0.00976054	0.017871	0.00907017	0.0189639	0.0243093	0.0125391	0.0171916	0.0242808	0.0286259	0.0512822	0.00811054	0.0411275	0.0259016	0.0366916	0.00761391
24.7499	0.0179306	0.0253296	0.0250361	0.0212226	0.0233251	0.0426619	0.0252348	0.0122557	0.0158071	0.02012	0.00659924	0.00226982	0.000124766	0.000509276	0.000688518	0.0200285	0.00685185	0.00221378	0.000675404	0.00138819	0.00253394	0.0053079	0.00475329	0.00154944	0.00168919	0.00563267	0.0038466	0.000838869	0.0108943	0.001366	0.0109409	0.00807269	0.0170394	0.016039	0.00951473	0.0176139	0.00880474	0.0186313	0.0237098	0.0121623	0.0167793	0.0239334	0.0279408	0.0500906	0.00789352	0.0403892	0.025288	0.0361208	0.00739064
24.7797	0.0174488	0.0247186	0.0245569	0.0206761	0.0227648	0.0418997	0.0246867	0.0119795	0.0153566	0.0195831	0.00639769	0.00219113	0.00011907	0.000490924	0.000663308	0.0194847	0.00669676	0.00214376	0.000647902	0.00134049	0.00243706	0.00511514	0.00460544	0.00149505	0.00163035	0.00546689	0.00373588	0.000807714	0.0105586	0.0013177	0.0106426	0.00787292	0.0166917	0.0156908	0.00927448	0.0173575	0.00854629	0.018303	0.0231221	0.0117943	0.016373	0.0235883	0.0272669	0.0489189	0.00768166	0.0396618	0.0246856	0.0355556	0.00717322
24.8095	0.0169773	0.0241154	0.024084	0.0201406	0.0222158	0.0411482	0.0241473	0.0117083	0.0149164	0.0190577	0.00620137	0.0021149	0.000113617	0.000473155	0.000638974	0.018951	0.00654443	0.00207578	0.00062141	0.00129435	0.00234354	0.00492853	0.00446157	0.00144239	0.00157335	0.00530543	0.00362769	0.000777563	0.0102312	0.00127094	0.0103513	0.00767801	0.0163509	0.0153505	0.00903963	0.0171017	0.00829465	0.0179789	0.0225459	0.0114348	0.0159726	0.0232455	0.0266044	0.0477669	0.00747484	0.0389449	0.0240943	0.0349956	0.0069615
24.8393	0.016516	0.0235199	0.0236172	0.0196158	0.021678	0.0404073	0.0236164	0.0114418	0.0144864	0.0185435	0.00601019	0.00204107	0.000108397	0.000455953	0.000615487	0.0184274	0.00639478	0.00200977	0.000595895	0.00124971	0.00225328	0.0047479	0.00432153	0.00139138	0.00151812	0.00514821	0.00352199	0.00074839	0.00991185	0.00122567	0.010067	0.0074878	0.0160167	0.0150179	0.00881005	0.0168465	0.00804964	0.0176587	0.0219811	0.0110837	0.0155781	0.0229048	0.025953	0.0466348	0.00727295	0.0382383	0.0235139	0.0344402	0.00675534
24.8691	0.0160647	0.0229316	0.0231563	0.0191017	0.021151	0.039677	0.0230938	0.0111795	0.0140663	0.0180404	0.00582402	0.00196956	0.000103402	0.000439301	0.000592818	0.0179138	0.00624777	0.00194568	0.000571326	0.00120651	0.00216621	0.00457313	0.00418521	0.001342	0.00146459	0.00499515	0.00341873	0.000720168	0.00960049	0.00118186	0.00978955	0.00730212	0.0156891	0.0146928	0.0085856	0.0165917	0.0078111	0.0173423	0.0214274	0.010741	0.0151896	0.0225663	0.0253129	0.0455225	0.00707587	0.0375417	0.0229443	0.0338891	0.00655462
24.8989	0.0156234	0.0223505	0.0227013	0.0185981	0.0206347	0.0389571	0.0225793	0.0109215	0.0136561	0.017548	0.00564277	0.00190031	9.86221e-05	0.000423182	0.000570939	0.0174101	0.00610334	0.00188346	0.00054767	0.00116473	0.00208225	0.00440409	0.00405249	0.0012942	0.0014127	0.00484618	0.00331784	0.000692872	0.00929696	0.00113946	0.00951874	0.00712082	0.0153677	0.014375	0.00836612	0.0163373	0.00757884	0.0170295	0.0208848	0.0104066	0.0148069	0.02223	0.0246838	0.04443	0.00688349	0.0368548	0.0223852	0.0333419	0.0063592
24.9287	0.015192	0.0217765	0.022252	0.0181049	0.0201289	0.0382476	0.0220727	0.0106674	0.0132556	0.0170662	0.00546634	0.00183326	9.40491e-05	0.000407581	0.000549825	0.0169163	0.00596142	0.00182306	0.000524898	0.0011243	0.00200134	0.00424063	0.00392328	0.00124792	0.0013624	0.0047012	0.00321928	0.000666474	0.00900112	0.00109844	0.00925448	0.00694375	0.0150524	0.0140643	0.00815149	0.0160832	0.0073527	0.0167202	0.020353	0.0100801	0.0144301	0.0218958	0.0240657	0.043357	0.00669571	0.0361771	0.0218366	0.0327983	0.00616895
24.9585	0.0147705	0.0212094	0.0218082	0.0176218	0.0196334	0.0375485	0.0215739	0.010417	0.0128644	0.0165946	0.00529462	0.00176835	8.96745e-05	0.000392484	0.000529448	0.0164322	0.00582198	0.00176441	0.00050298	0.00108518	0.0019234	0.00408264	0.00379748	0.00120312	0.00131362	0.00456015	0.003123	0.000640952	0.00871283	0.00105875	0.00899664	0.00677075	0.0147428	0.0137606	0.00794156	0.0158293	0.0071325	0.0164142	0.0198318	0.00976168	0.0140591	0.0215638	0.0234586	0.0423036	0.00651241	0.0355084	0.0212982	0.0322581	0.00598374
24.9883	0.0143586	0.0206493	0.02137	0.0171488	0.0191479	0.0368595	0.0210826	0.0101704	0.0124826	0.0161332	0.00512751	0.00170551	8.54906e-05	0.000377876	0.000509783	0.0159579	0.00568494	0.00170747	0.000481888	0.00104733	0.00184837	0.00393	0.00367499	0.00115977	0.00126634	0.00442293	0.00302897	0.00061628	0.00843194	0.00102035	0.00874508	0.00660167	0.0144389	0.0134636	0.00773621	0.0155756	0.00691809	0.0161113	0.0193212	0.00945105	0.013694	0.021234	0.0228624	0.0412696	0.00633349	0.0348482	0.0207698	0.031721	0.00580345
25.0181	0.0139565	0.0200962	0.0209371	0.0166857	0.0186722	0.0361805	0.0205988	0.00992739	0.0121099	0.0156815	0.00496492	0.0016447	8.14895e-05	0.000363742	0.000490806	0.0154933	0.00555026	0.00165218	0.000461595	0.0010107	0.0017762	0.00378262	0.00355574	0.00111782	0.00122049	0.00428946	0.00293713	0.000592435	0.00815832	0.000983213	0.00849967	0.00643637	0.0141403	0.0131732	0.00753529	0.0153221	0.0067093	0.0158115	0.0188208	0.00914812	0.0133348	0.0209063	0.022277	0.0402548	0.00615883	0.0341963	0.0202512	0.0311869	0.00562794
25.0479	0.013564	0.0195502	0.0205096	0.0162323	0.0182061	0.0355114	0.0201222	0.00968787	0.0117462	0.0152396	0.00480675	0.00158584	7.76639e-05	0.00035007	0.000472493	0.0150382	0.00541789	0.00159851	0.000442072	0.000975255	0.00170684	0.00364038	0.00343966	0.00107723	0.00117605	0.00415967	0.00284745	0.000569393	0.00789185	0.000947296	0.00826029	0.00627472	0.0138469	0.0128891	0.00733869	0.0150689	0.00650596	0.0155145	0.0183305	0.00885279	0.0129813	0.0205807	0.0217023	0.039259	0.00598834	0.0335522	0.0197424	0.0306557	0.00545711
25.0777	0.0131811	0.0190113	0.0200872	0.0157885	0.0177494	0.034852	0.0196527	0.00945181	0.0113913	0.014807	0.00465291	0.00152888	7.40067e-05	0.000336846	0.000454822	0.0145927	0.00528778	0.00154639	0.000423295	0.000940956	0.00164024	0.00350319	0.00332666	0.00103796	0.00113297	0.00403347	0.00275989	0.000547131	0.00763238	0.000912563	0.00802679	0.00611656	0.0135585	0.0126111	0.00714627	0.0148158	0.00630792	0.0152203	0.0178502	0.00856491	0.0126338	0.0202573	0.0211383	0.0382821	0.0058219	0.0329156	0.0192431	0.0301273	0.00529083
25.1075	0.0128078	0.0184796	0.01967	0.015354	0.017302	0.034202	0.0191903	0.00921915	0.0110451	0.0143837	0.00450331	0.00147378	7.05109e-05	0.000324057	0.000437769	0.0141566	0.00515986	0.00149578	0.000405239	0.000907763	0.00157635	0.00337098	0.00321668	0.000999968	0.00109122	0.00391077	0.00267441	0.000525627	0.00737978	0.000878981	0.00779904	0.00596179	0.0132748	0.012339	0.00695793	0.014563	0.00611503	0.0149287	0.0173797	0.00828438	0.012292	0.019936	0.0205848	0.0373238	0.00565943	0.0322862	0.0187531	0.0296015	0.00512899
25.1373	0.0124441	0.0179553	0.0192578	0.0149288	0.0168635	0.0335612	0.0187347	0.00898986	0.0107074	0.0139694	0.00435785	0.00142046	6.71701e-05	0.000311691	0.000421314	0.0137299	0.00503411	0.00144664	0.000387878	0.000875641	0.00151513	0.00324366	0.00310965	0.00096322	0.00105076	0.00379149	0.00259098	0.000504859	0.00713394	0.000846516	0.00757693	0.00581027	0.0129957	0.0120726	0.00677354	0.0143105	0.00592714	0.0146397	0.0169187	0.00801107	0.0119561	0.0196169	0.0200419	0.0363839	0.00550082	0.0316637	0.0182723	0.0290784	0.00497146
25.1672	0.0120899	0.0174386	0.0188505	0.0145127	0.0164339	0.0329294	0.0182858	0.00876391	0.010378	0.013564	0.00421644	0.00136889	6.39779e-05	0.000299736	0.000405435	0.0133126	0.00491047	0.00139892	0.00037119	0.000844553	0.00145655	0.00312116	0.00300551	0.000927679	0.00101155	0.00367556	0.00250956	0.000484806	0.00689471	0.000815134	0.00736031	0.00566189	0.012721	0.0118117	0.00659301	0.0140583	0.00574412	0.0143532	0.0164672	0.00774486	0.0116261	0.0192999	0.0195093	0.0354622	0.00534598	0.0310477	0.0178005	0.0285579	0.00481815
25.197	0.0117452	0.0169295	0.0184482	0.0141055	0.0160129	0.0323062	0.0178436	0.00854129	0.0100569	0.0131673	0.004079	0.001319	6.0928e-05	0.000288179	0.000390113	0.0129045	0.0047889	0.00135259	0.000355151	0.000814466	0.00140057	0.0030034	0.00290419	0.000893309	0.000973578	0.00356288	0.00243012	0.000465447	0.00666198	0.000784804	0.00714906	0.00551655	0.0124505	0.0115561	0.00641623	0.0138065	0.00556581	0.0140691	0.016025	0.00748563	0.0113019	0.0189851	0.0189871	0.0345584	0.00519482	0.030438	0.0173375	0.0280401	0.00466893
25.2268	0.0114101	0.0164282	0.0180508	0.0137071	0.0156002	0.0316914	0.0174079	0.00832199	0.00974379	0.0127791	0.00394543	0.00127076	5.80147e-05	0.00027701	0.000375329	0.0125056	0.00466936	0.00130759	0.00033974	0.000785347	0.00134714	0.00289031	0.00280565	0.000860075	0.000936799	0.00345336	0.00235261	0.000446761	0.00643563	0.000755495	0.00694306	0.00537414	0.0121841	0.0113056	0.0062431	0.0135551	0.0053921	0.0137873	0.0155919	0.00723327	0.0109836	0.0186725	0.018475	0.0336722	0.00504725	0.0298342	0.0168833	0.0275249	0.00452371
25.2566	0.0110844	0.0159349	0.0176582	0.0133173	0.0151958	0.0310846	0.0169787	0.008106	0.00943859	0.0123992	0.00381564	0.00122411	5.52323e-05	0.000266217	0.000361064	0.0121158	0.00455181	0.00126389	0.000324935	0.000757165	0.00129622	0.00278179	0.00270981	0.000827942	0.000901186	0.00334694	0.00227703	0.000428729	0.00621552	0.000727175	0.00674219	0.00523457	0.0119216	0.01106	0.00607353	0.0133042	0.00522285	0.0135078	0.0151677	0.00698765	0.0106712	0.018362	0.0179732	0.0328034	0.00490318	0.0292362	0.0164377	0.0270124	0.00438239
25.2864	0.0107681	0.0154497	0.0172703	0.012936	0.0147994	0.0304855	0.0165558	0.00789332	0.00914114	0.0120276	0.00368955	0.00117899	5.25752e-05	0.000255789	0.0003473	0.0117351	0.00443622	0.00122146	0.000310714	0.00072989	0.00124774	0.00267775	0.00261662	0.000796879	0.00086671	0.00324351	0.00220332	0.000411332	0.00600155	0.000699816	0.00654632	0.00509775	0.0116629	0.0108191	0.00590744	0.0130539	0.00505794	0.0132305	0.0147524	0.00674867	0.0103646	0.0180537	0.0174813	0.0319517	0.00476252	0.0286436	0.0160005	0.0265027	0.00424486
25.3162	0.0104611	0.0149728	0.0168872	0.0125631	0.0144109	0.0298939	0.0161393	0.00768394	0.00885128	0.0116641	0.00356706	0.00113538	5.00383e-05	0.000245715	0.000334019	0.0113633	0.00432255	0.00118025	0.000297059	0.000703493	0.00120164	0.00257806	0.00252604	0.000766852	0.000833344	0.003143	0.00213146	0.00039455	0.00579359	0.000673389	0.00635533	0.0049636	0.0114078	0.0105827	0.00574476	0.0128043	0.00489726	0.0129555	0.0143457	0.00651619	0.0100639	0.0177475	0.0169995	0.0311169	0.00462521	0.0280564	0.0155716	0.0259957	0.00411102
25.346	0.0101631	0.0145044	0.0165088	0.0121983	0.0140301	0.0293094	0.015729	0.00747787	0.00856887	0.0113085	0.0034481	0.00109322	4.76165e-05	0.000235985	0.000321205	0.0110004	0.00421077	0.00114023	0.000283948	0.000677947	0.00115782	0.0024826	0.002438	0.000737832	0.000801059	0.00304533	0.00206142	0.000378364	0.00559153	0.000647865	0.00616911	0.00483205	0.0111563	0.0103506	0.0055854	0.0125554	0.0047407	0.0126827	0.0139475	0.00629011	0.00976913	0.0174435	0.0165275	0.0302985	0.00449115	0.0274742	0.0151509	0.0254916	0.00398079
25.3758	0.00987401	0.0140445	0.0161351	0.0118417	0.0136567	0.0287317	0.0153248	0.00727512	0.00829374	0.0109608	0.00333257	0.00105246	4.5305e-05	0.000226589	0.000308842	0.0106463	0.00410086	0.00110136	0.000271364	0.000653224	0.00111619	0.00239119	0.00235245	0.000709786	0.000769828	0.0029504	0.00199317	0.000362758	0.00539524	0.000623218	0.00598754	0.00470303	0.0109082	0.0101226	0.0054293	0.0123073	0.00458815	0.012412	0.0135578	0.00607031	0.00948022	0.0171417	0.0160653	0.0294965	0.00436028	0.0268971	0.0147383	0.0249904	0.00385407
25.4056	0.0095934	0.0135933	0.015766	0.011493	0.0132908	0.0281605	0.0149268	0.00707568	0.00802575	0.0106208	0.0032204	0.00101308	4.3099e-05	0.000217517	0.000296915	0.010301	0.00399278	0.00106362	0.000259287	0.0006293	0.00107661	0.00230365	0.00226934	0.000682687	0.000739625	0.00285814	0.00192668	0.000347712	0.00520462	0.00059942	0.00581052	0.00457648	0.0106635	0.00989869	0.0052764	0.0120602	0.00443951	0.0121436	0.0131762	0.00585667	0.00919719	0.016842	0.0156127	0.0287104	0.00423252	0.0263248	0.0143336	0.0244923	0.00373077
25.4354	0.00932092	0.0131509	0.0154016	0.0111521	0.012932	0.0275955	0.014535	0.00687957	0.00776475	0.0102884	0.00311148	0.000975013	4.09942e-05	0.00020876	0.000285409	0.00996423	0.00388652	0.00102697	0.0002477	0.00060615	0.00103896	0.00221977	0.00218863	0.000656504	0.000710424	0.00276848	0.00186192	0.000333211	0.00501955	0.000576447	0.00563793	0.00445234	0.010422	0.00967858	0.00512663	0.0118141	0.00429468	0.0118773	0.0128028	0.00564909	0.00892004	0.0165445	0.0151697	0.0279401	0.00410781	0.0257573	0.0139368	0.0239973	0.00361081
25.4652	0.00905616	0.0127175	0.0150419	0.0108188	0.0125802	0.0270365	0.0141492	0.00668679	0.0075106	0.00996352	0.00300576	0.000938234	3.89861e-05	0.000200308	0.000274309	0.00963603	0.00378206	0.000991387	0.000236586	0.00058375	0.00100308	0.00213934	0.00211025	0.000631212	0.0006822	0.00268133	0.00179887	0.000319238	0.00483991	0.000554272	0.00546967	0.00433057	0.0101837	0.00946214	0.00497994	0.0115691	0.00415357	0.0116133	0.0124374	0.00544743	0.00864876	0.0162492	0.0147362	0.0271852	0.00398607	0.0251945	0.0135477	0.0235056	0.00349411
25.495	0.00879864	0.0122932	0.0146868	0.0104932	0.0122354	0.0264833	0.0137694	0.00649734	0.00726313	0.00964606	0.00290313	0.0009027	3.70707e-05	0.000192152	0.000263602	0.00931626	0.00367938	0.000956837	0.000225927	0.000562077	0.000968823	0.00206213	0.00203417	0.000606782	0.000654927	0.00259661	0.00173749	0.000305775	0.0046656	0.000532871	0.00530564	0.00421111	0.00994858	0.00924925	0.00483629	0.0113253	0.0040161	0.0113515	0.0120798	0.0052516	0.00838335	0.015956	0.0143121	0.0264455	0.00386725	0.0246363	0.0131663	0.0230173	0.00338058
25.5248	0.00854792	0.0118779	0.0143364	0.010175	0.0118973	0.0259357	0.0133957	0.00631123	0.00702222	0.00933593	0.00280354	0.000868374	3.52439e-05	0.000184284	0.000253274	0.00900484	0.00357846	0.000923295	0.000215708	0.00054111	0.00093604	0.00198791	0.00196033	0.000583188	0.00062858	0.00251425	0.00167776	0.000292808	0.0044965	0.000512221	0.00514574	0.00409394	0.00971652	0.00903977	0.00469562	0.0110829	0.00388217	0.0110921	0.01173	0.00506147	0.00812378	0.015665	0.0138973	0.0257208	0.00375127	0.0240828	0.0127925	0.0225325	0.00327014
[truncated: 264 more rows]
[truncated: 132 more columns]

## Sheet: Plants_to_Pollen
Level	Family	Genus	Species	Pollen type	Original name by L. Dupont (if modified)
1	ACANTHACEAE			Acanthaceae undiff.	Acanthaceae
1	AIZOACEAE			Aizoaceae
[truncated: 244 more rows]

## Sheet: Pollen_data
Age	Vachellia/Senegalia	Acalypha	Acanthaceae undiff.	Adenia	Afraegle	Afzelia	Aizoaceae	Alchemilla	Alchornea	Allanblackia	Allophylus	Aloe-type	Chenopodiaceae/Amaranthaceae	Ammannia	Anthocleista	Anthospermum-type	Asteraceae Liguliflorae	Asteraceae Tubuliflorae	Asteraceae Vernoniae	Avicennia	Balanites	Baphia-type	Barringtonia	Basella	Berlinia-type	Blighia-type	Borassus	Boscia/Maerua-type	Brachystegia	Brassicaceae	Bridelia	Burkea	Buxus	Notobuxus	Buxus madagascaria-type	Caesalpiniaceae	Calamus	Campanulaceae undiff.	Canarium	Canthium/Morelia-type	Caperonia-type	Capparis	Caryophyllaceae undiff.	Cassia-type	Casuarina	Celastraceae	Celtis	Centaurea	Cephalosphaera
[truncated: 220 more rows]
[truncated: 166 more columns]

[truncated: 1 more sheets: Used_Taxa]
